# Supplementary material for: Co-Expression Analysis Reveals Differential Expression of Homologous Genes Associated with Specific Terpenoid Biosynthesis in Rehmannia glutinosa
Source: MDPI journal article supplement (doi:10.3390/genes13061092), 2022-06-19
Supplement: s1 [file s1]

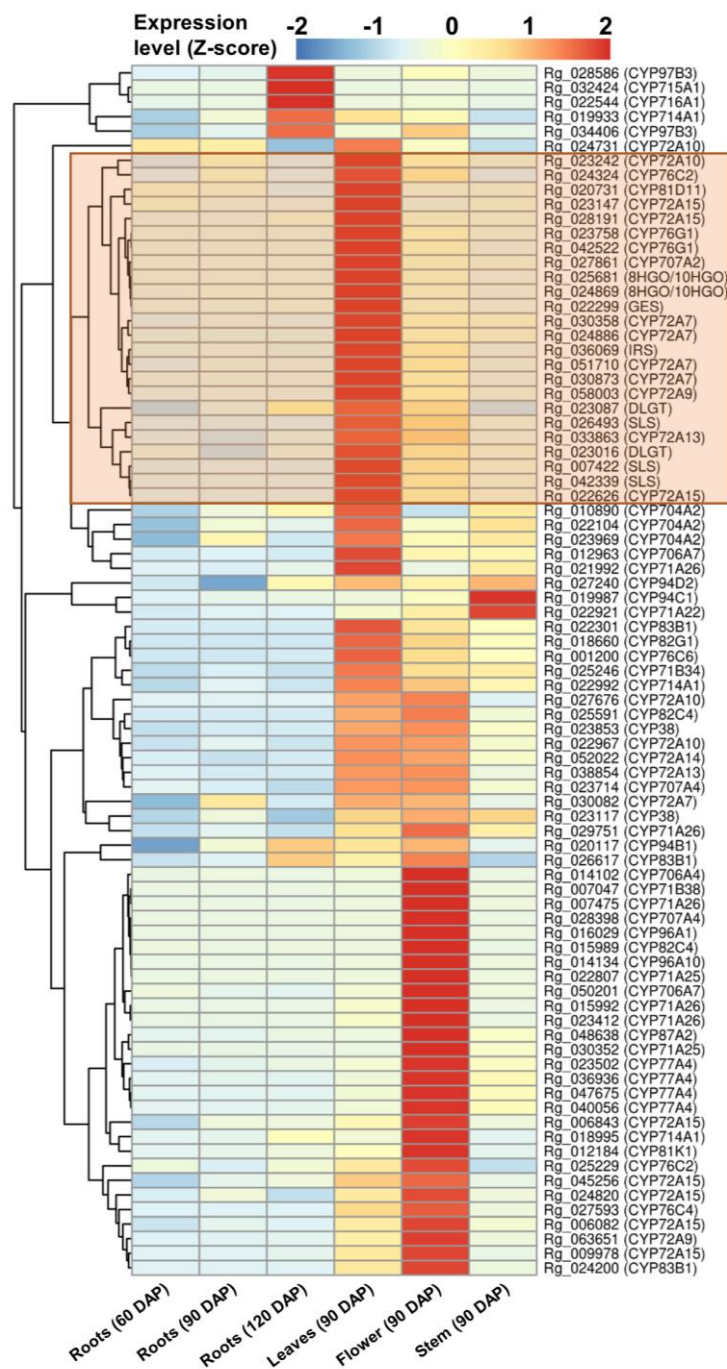

**Figure S1. Heatmap analysis of genes encoding CYP450.** Red box indicates CYP450-encoding genes that were co-expressed with secologanin synthesis genes.

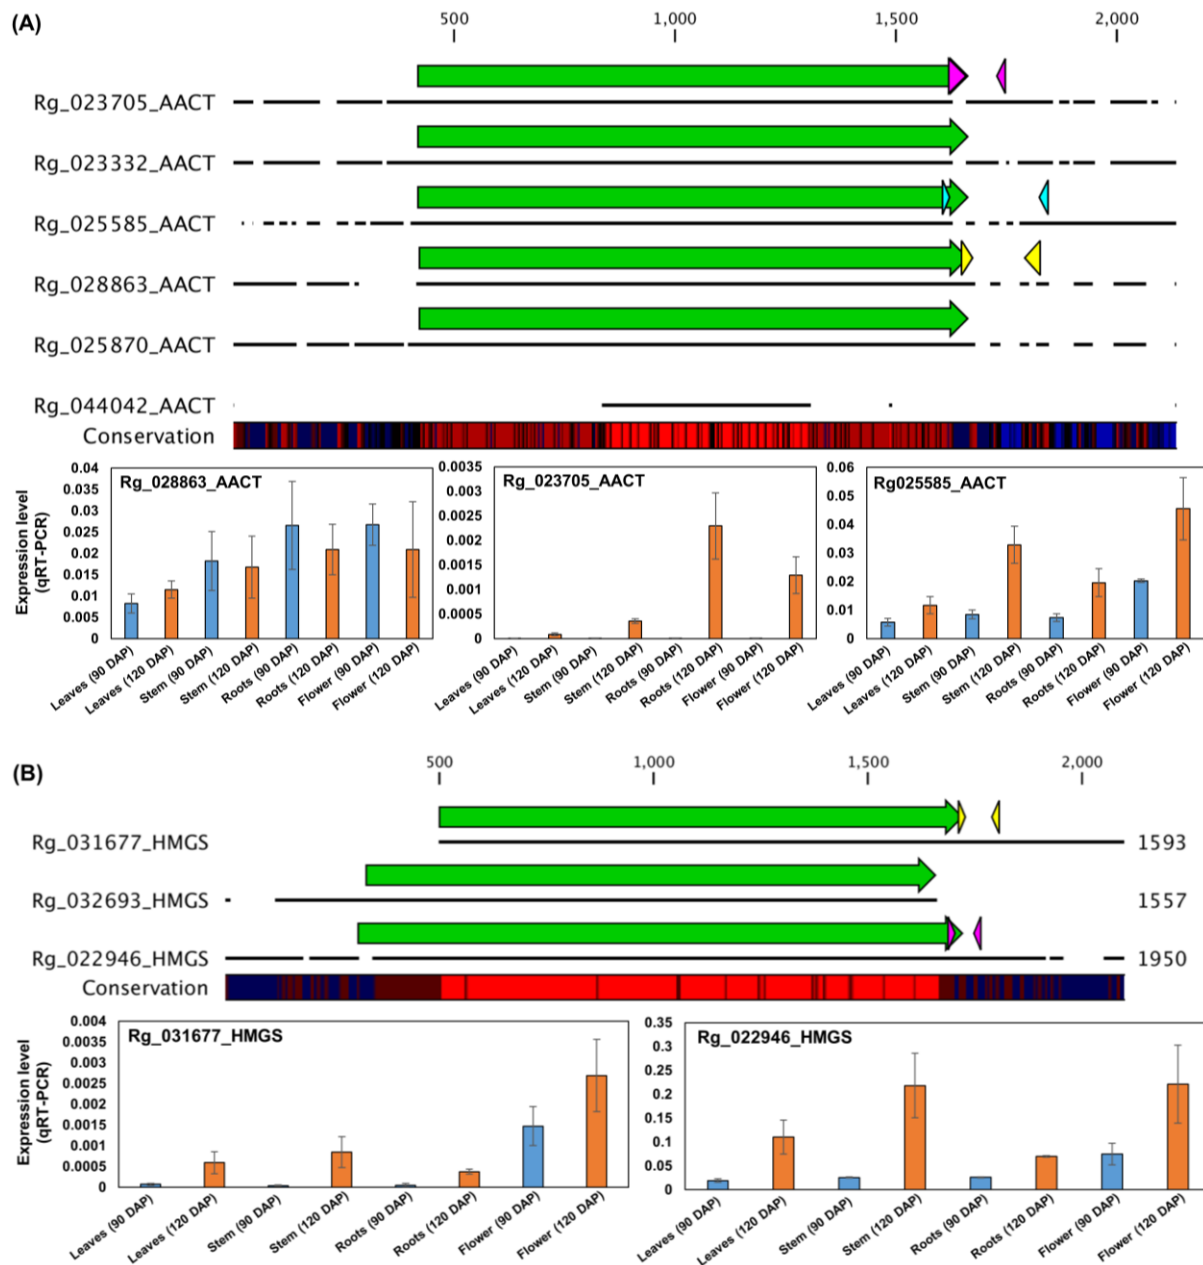

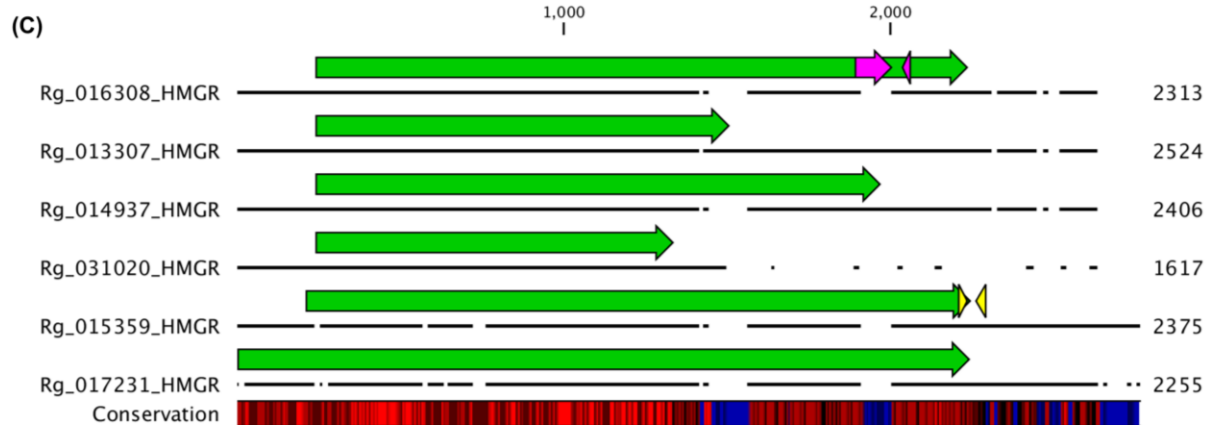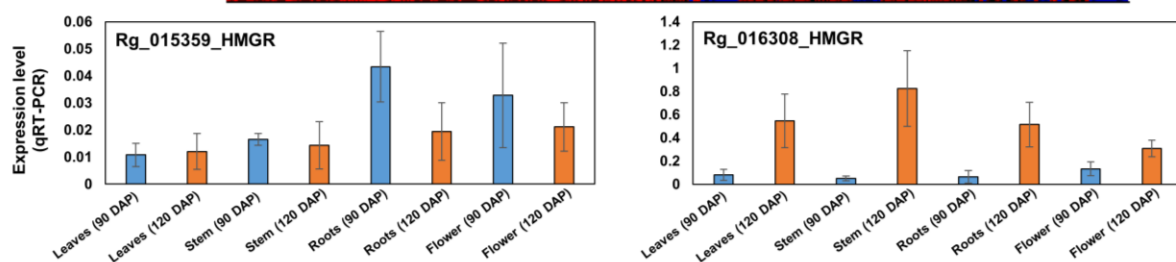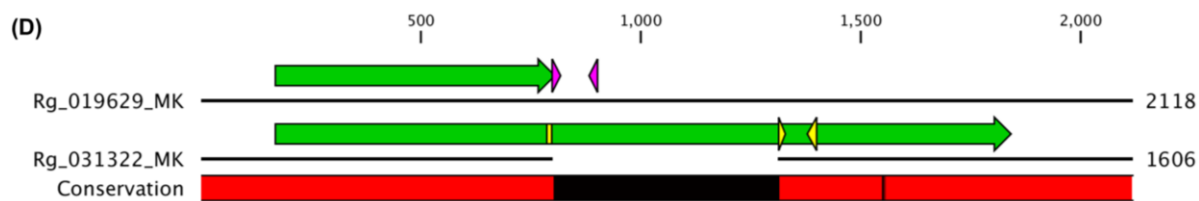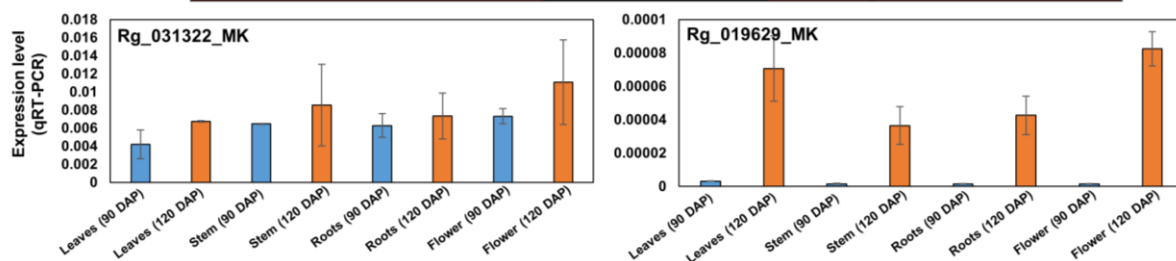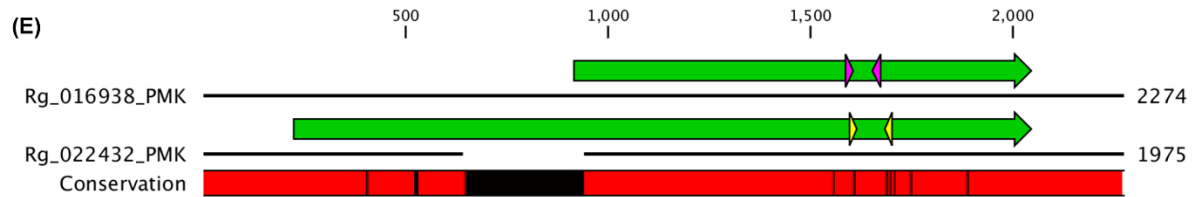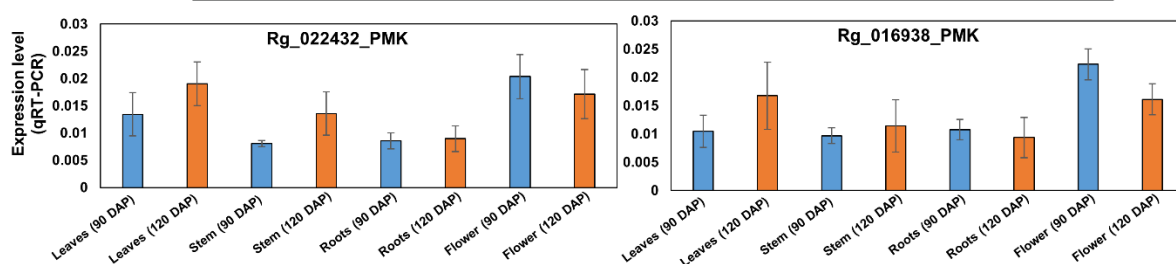

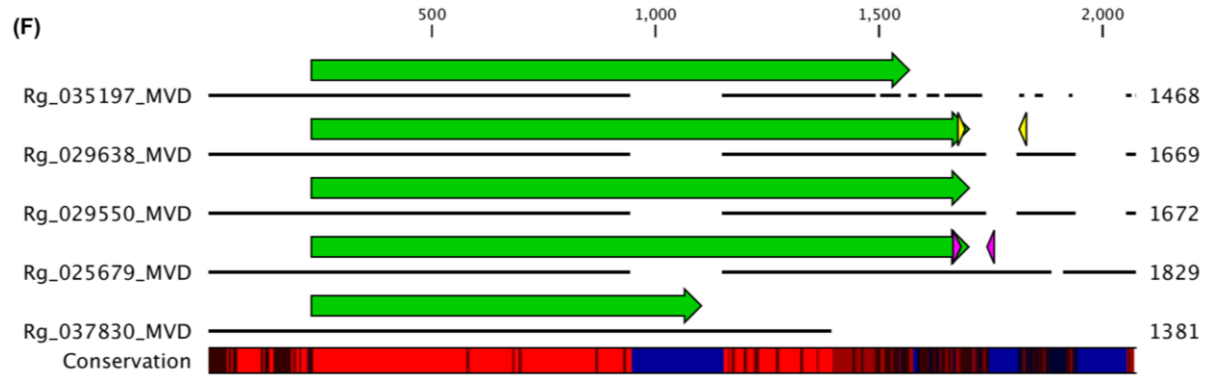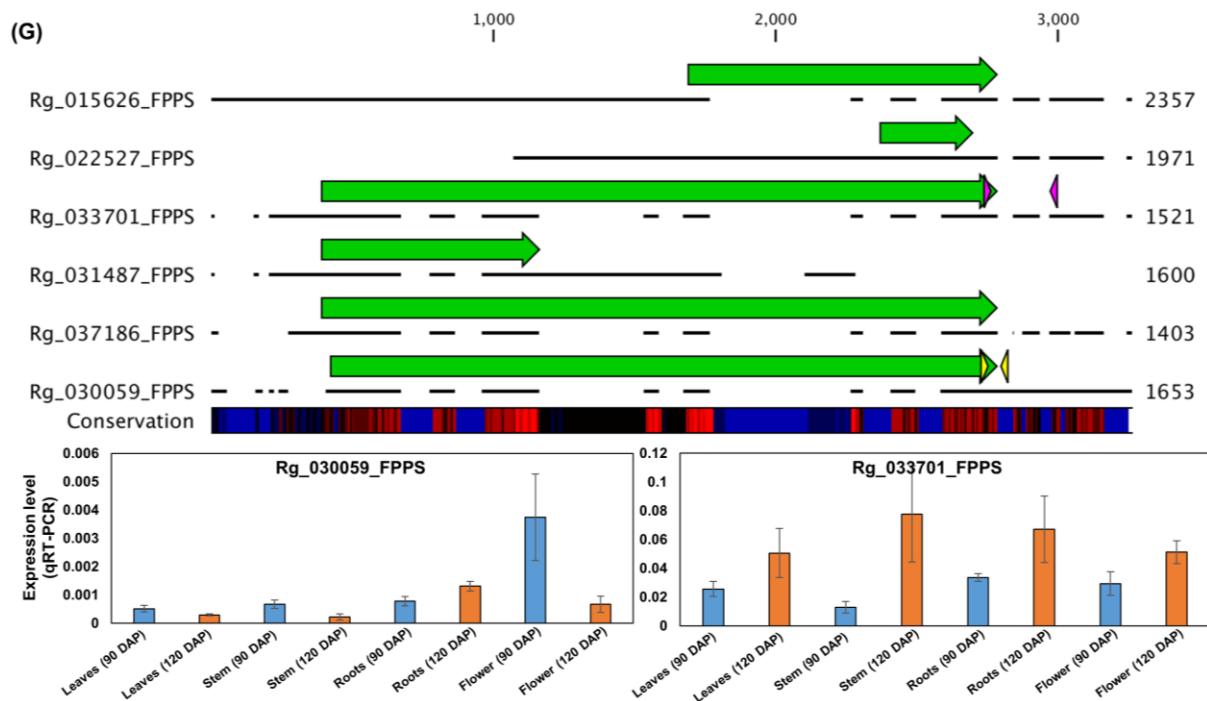

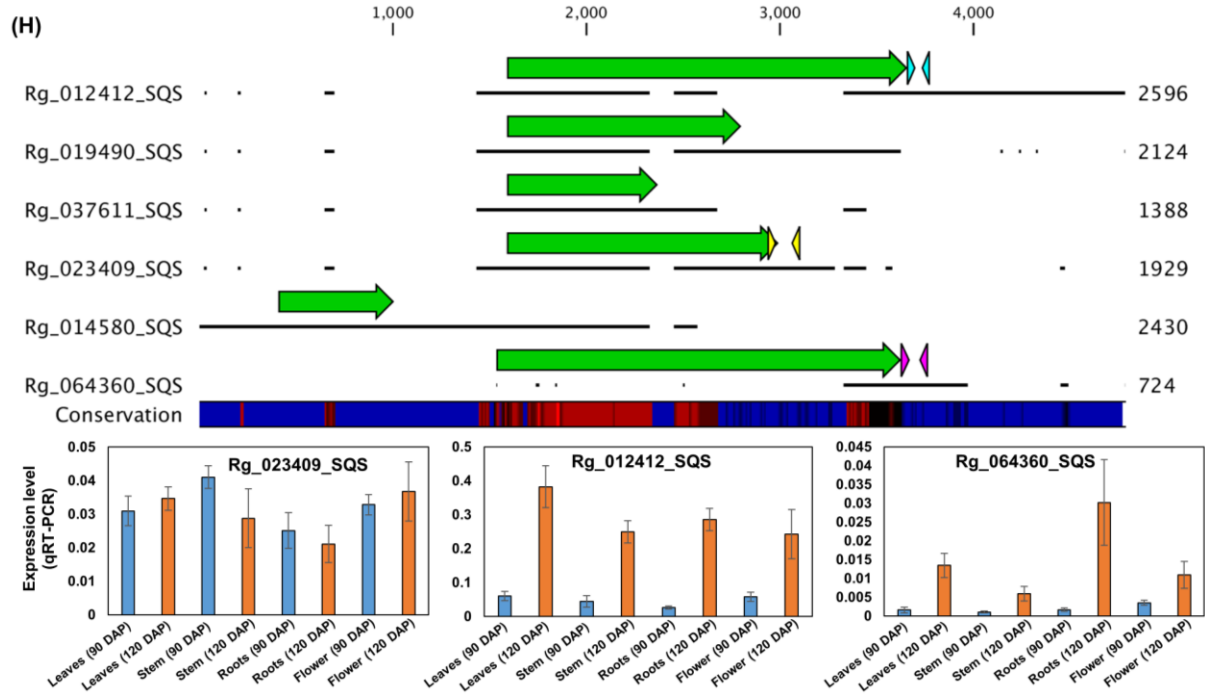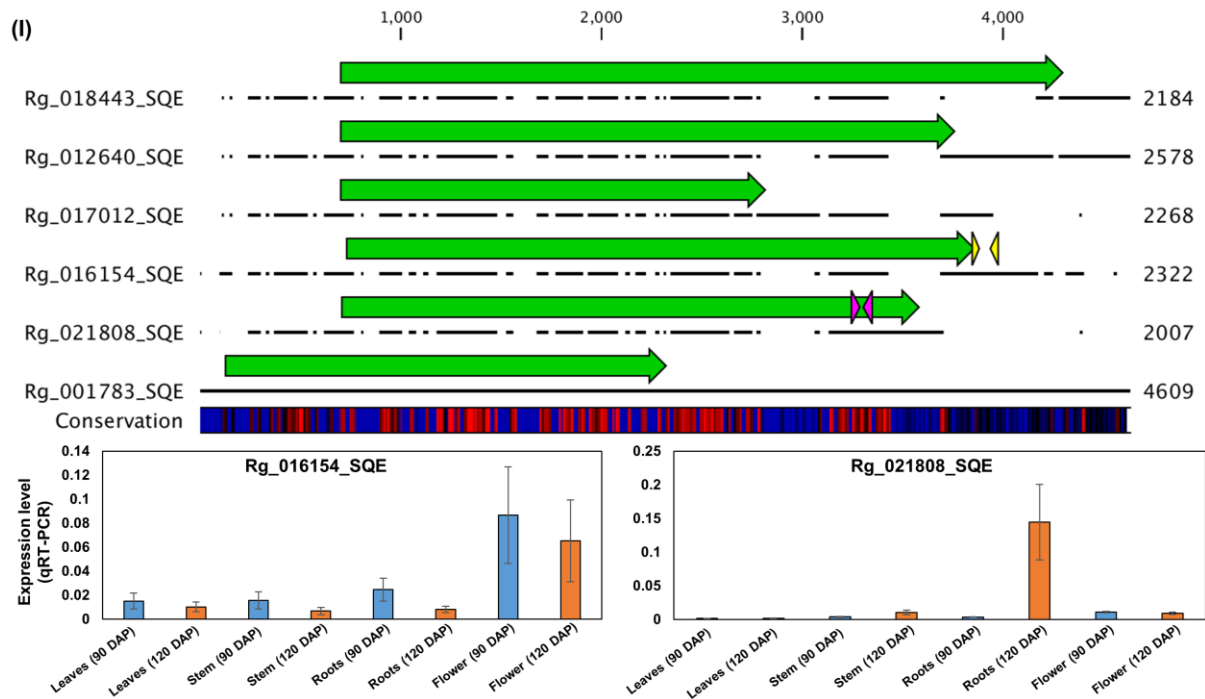

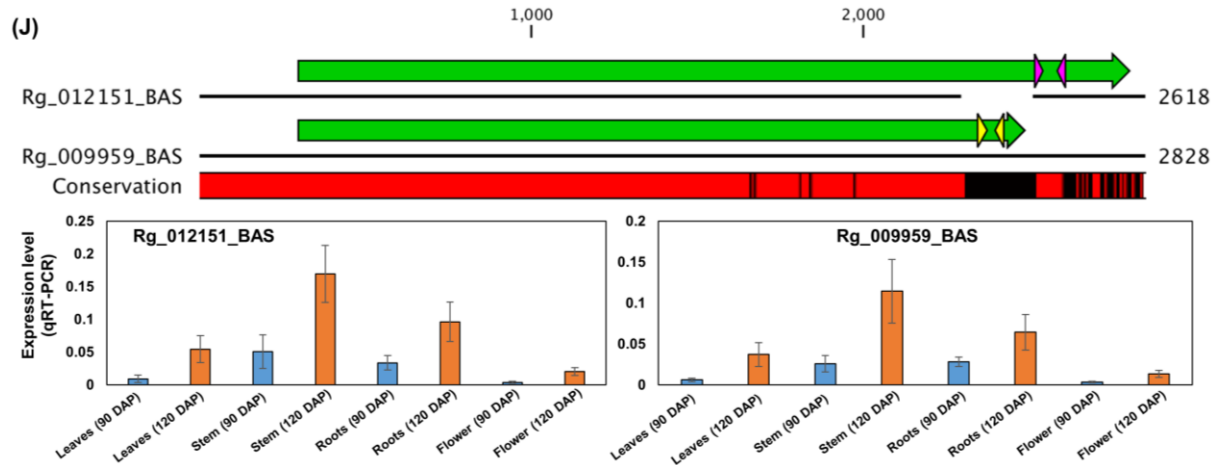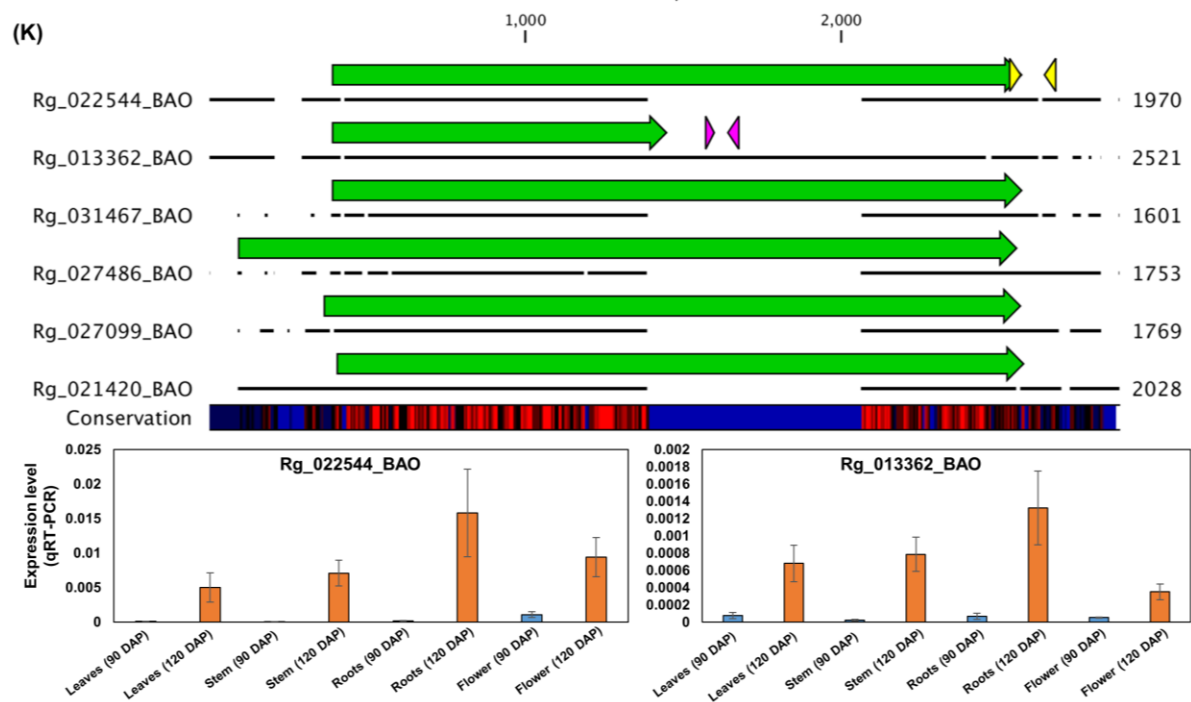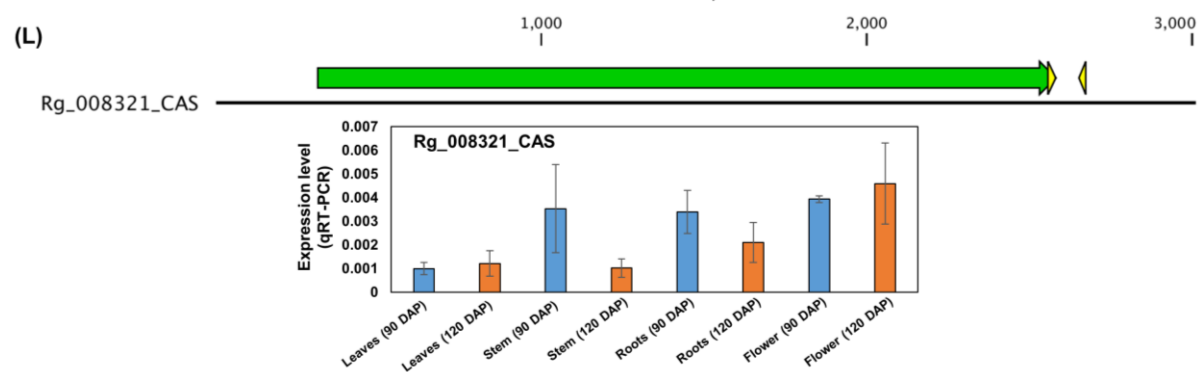

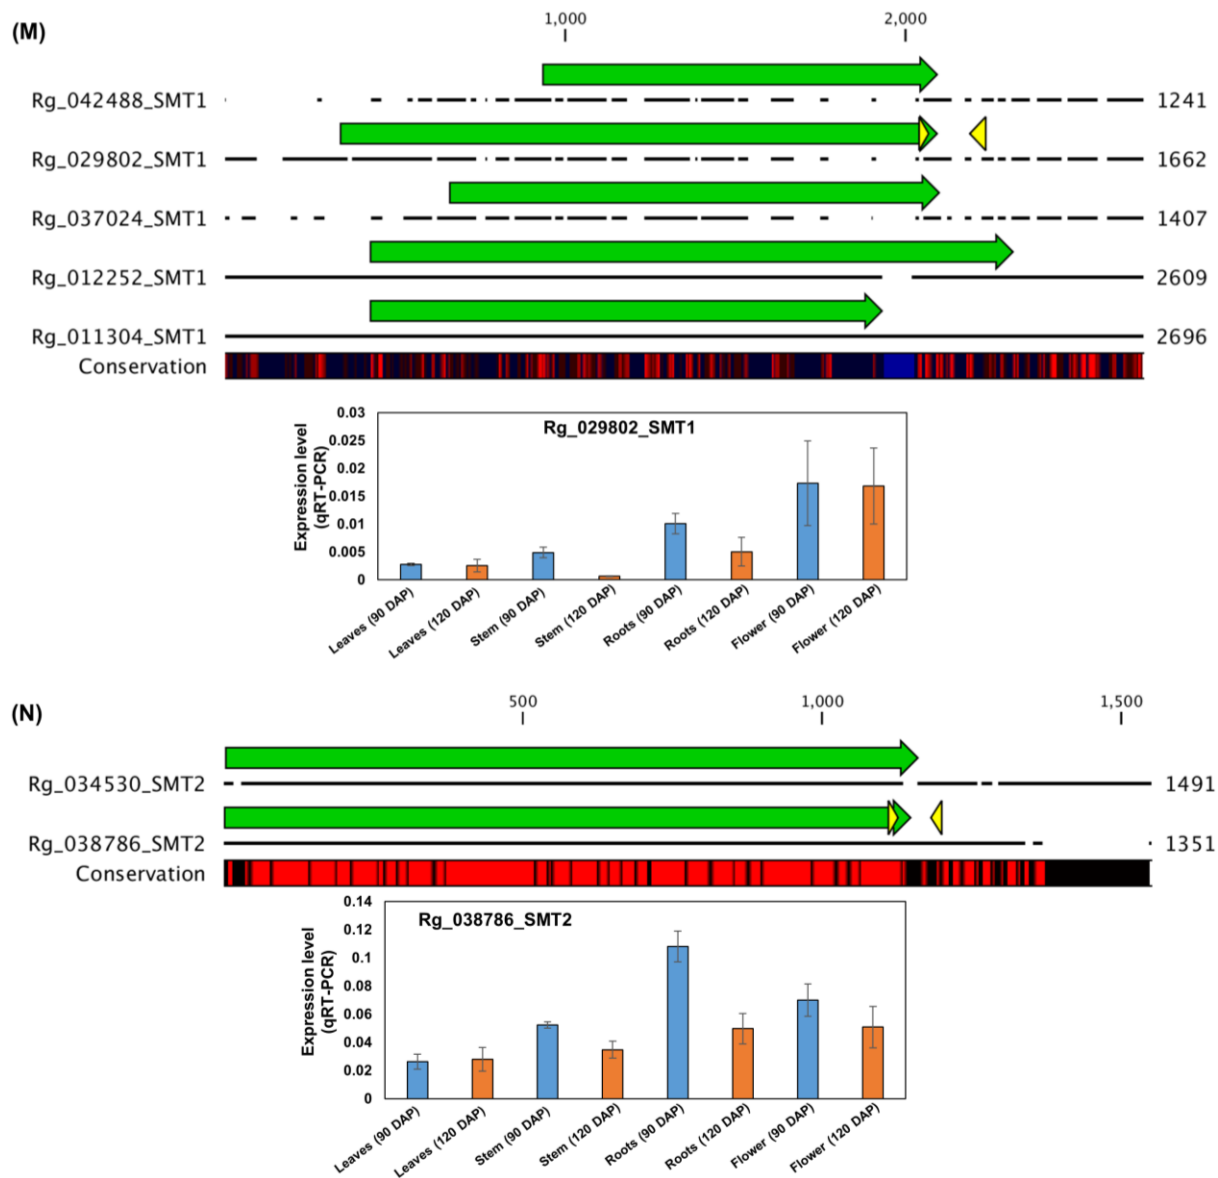

**Figure S2.** qRT-PCR test of the genes involved in sterol and saponin biosynthesis via the MVA pathway.

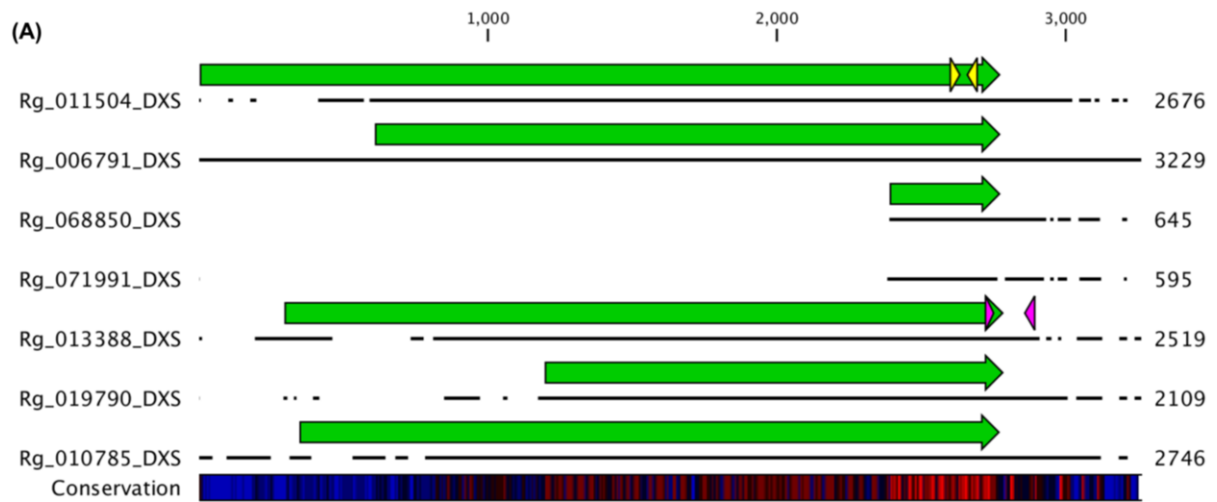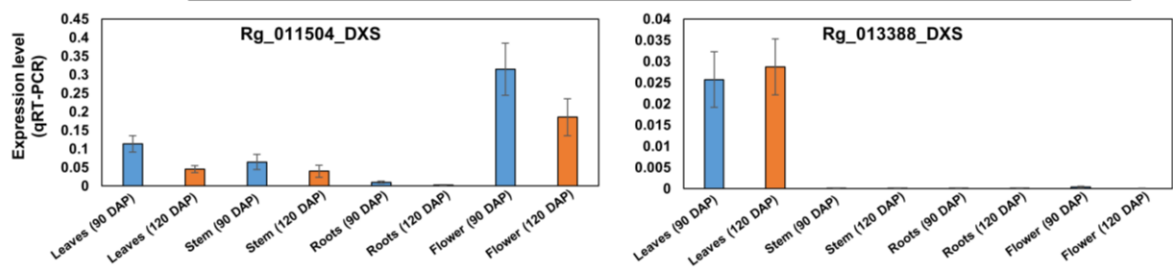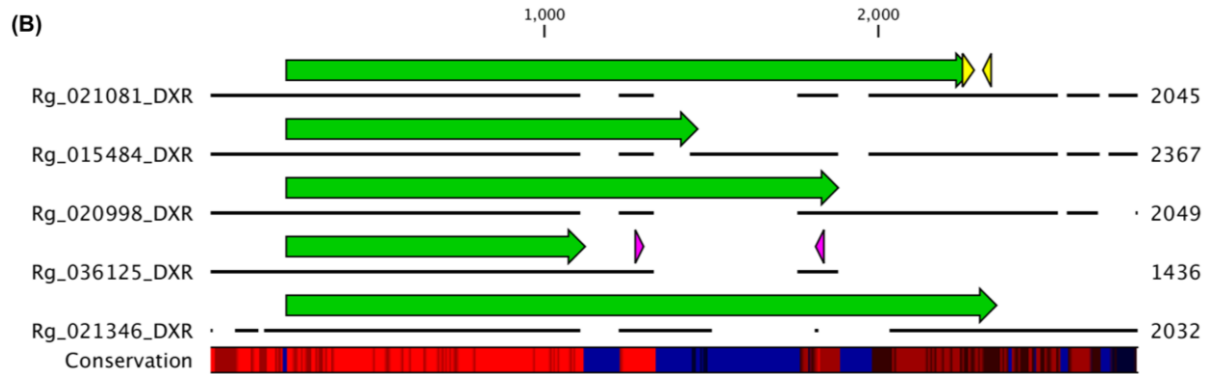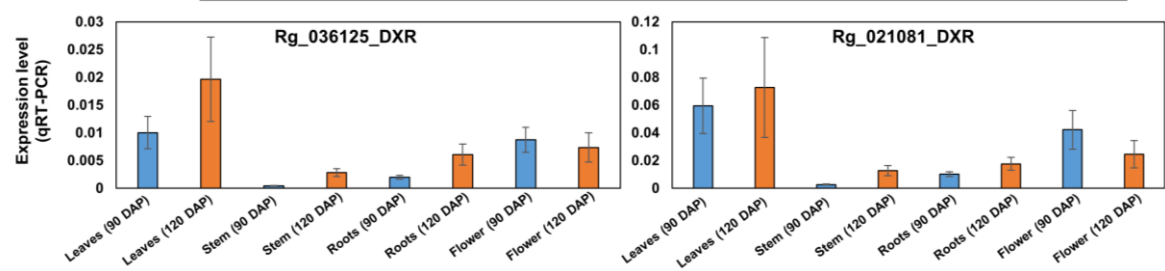



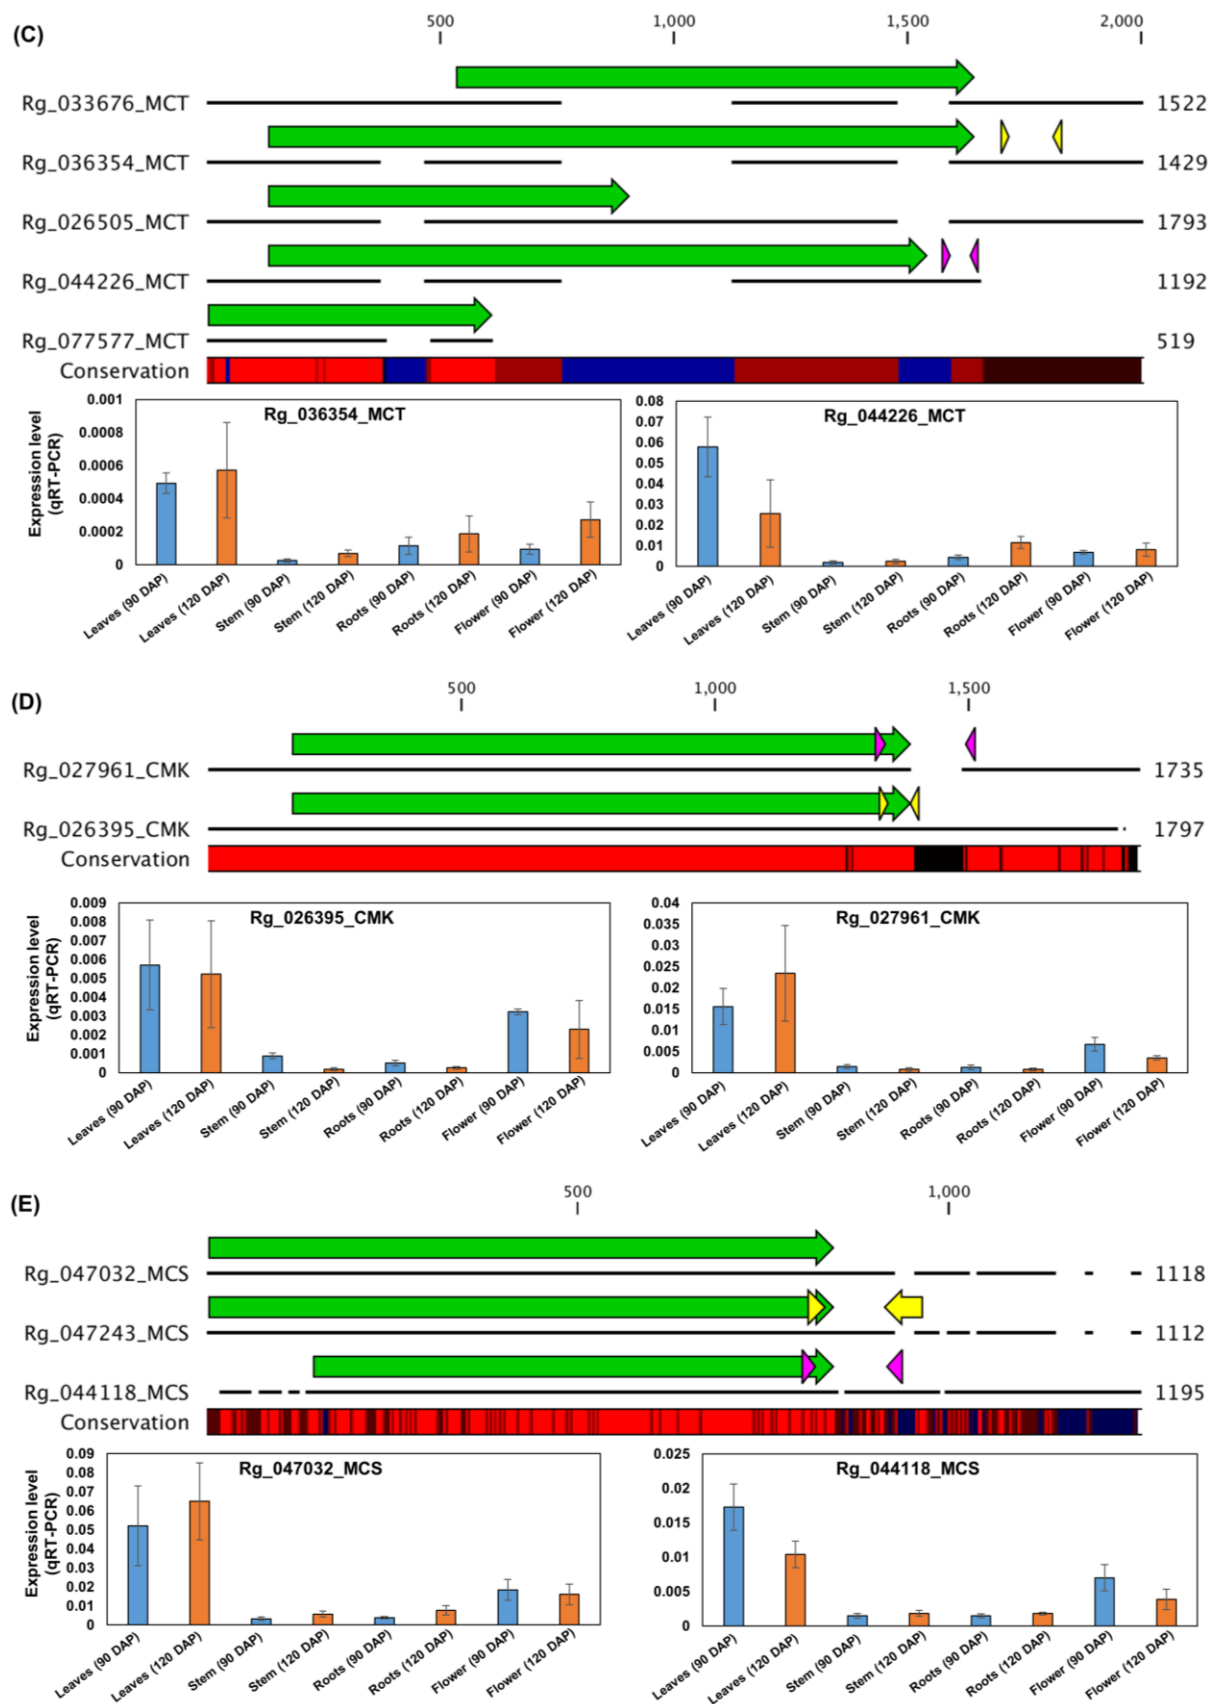

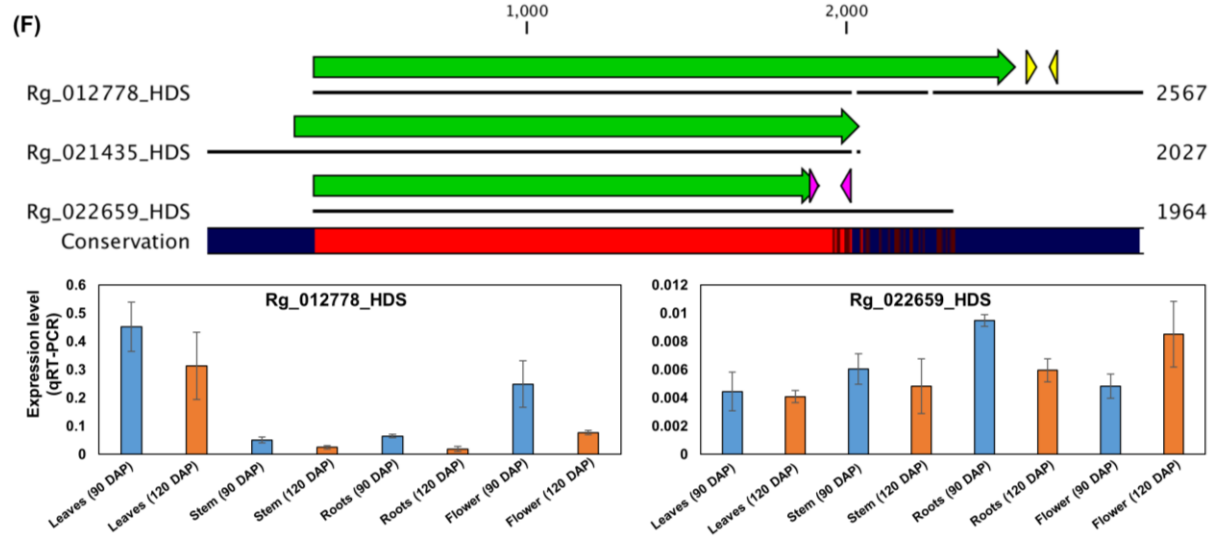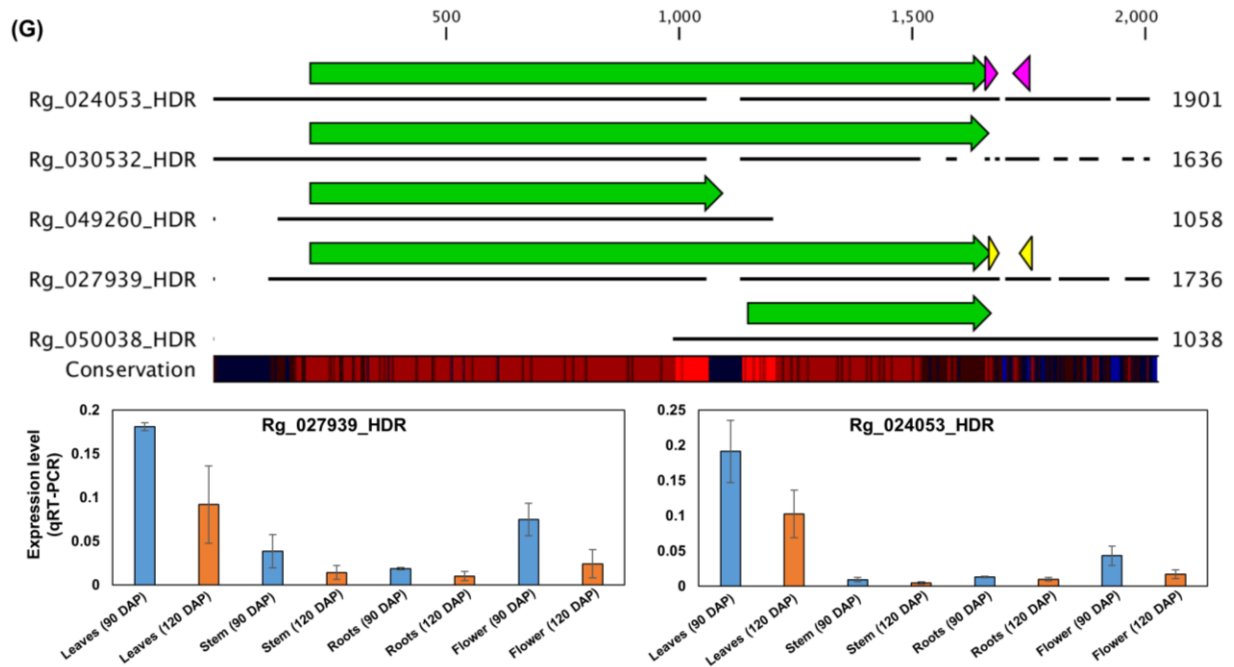

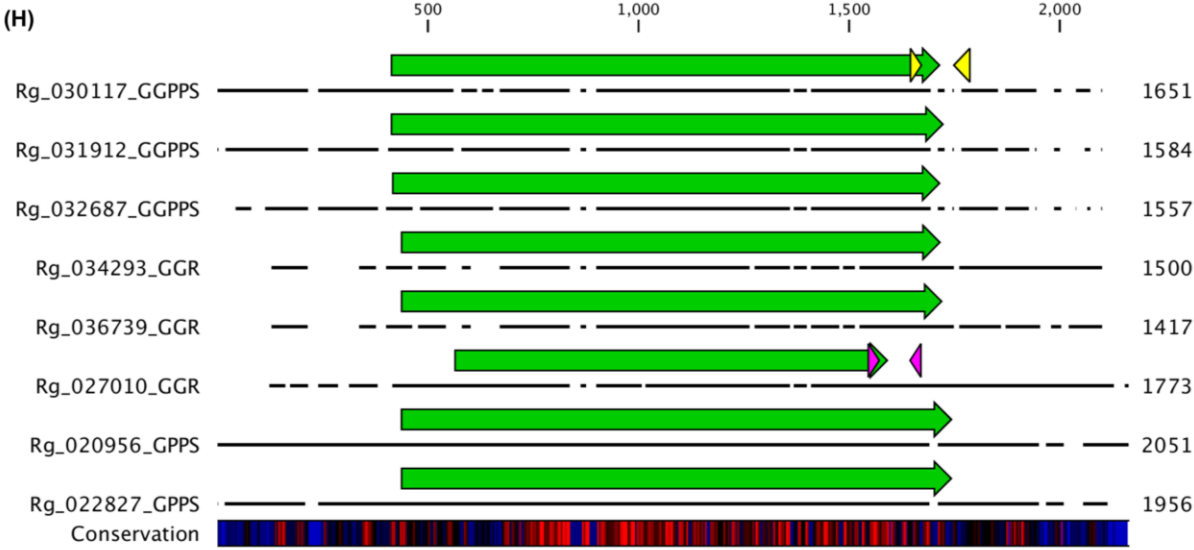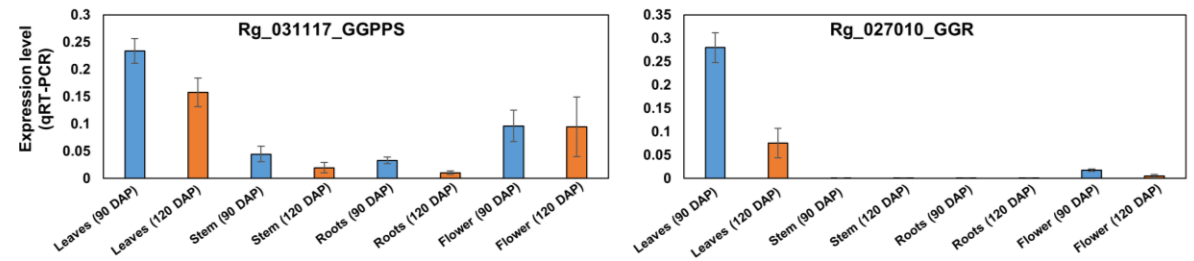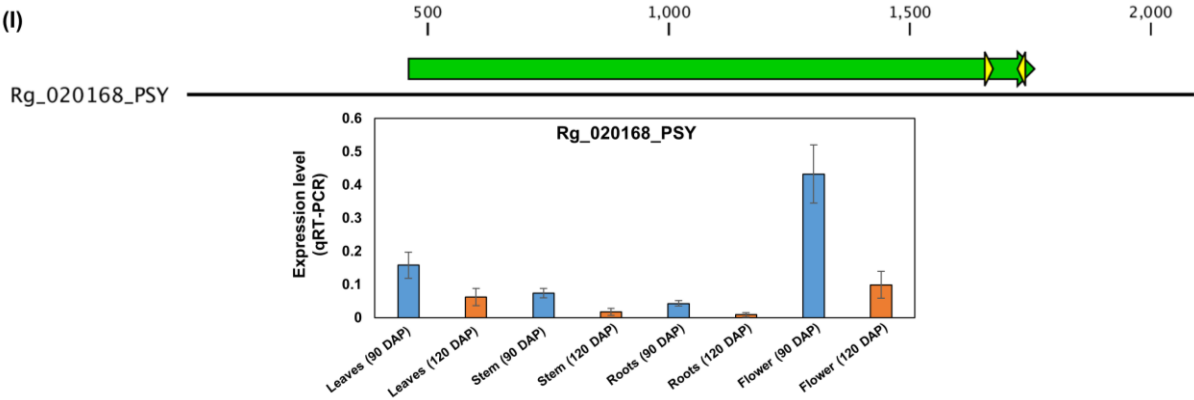

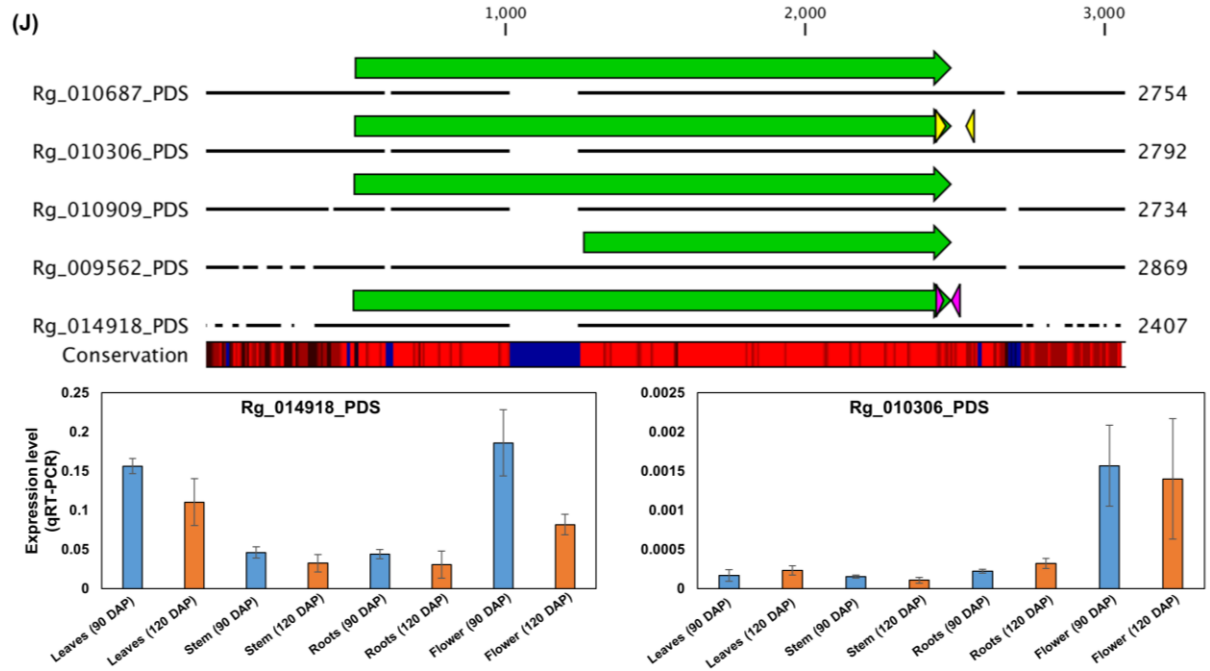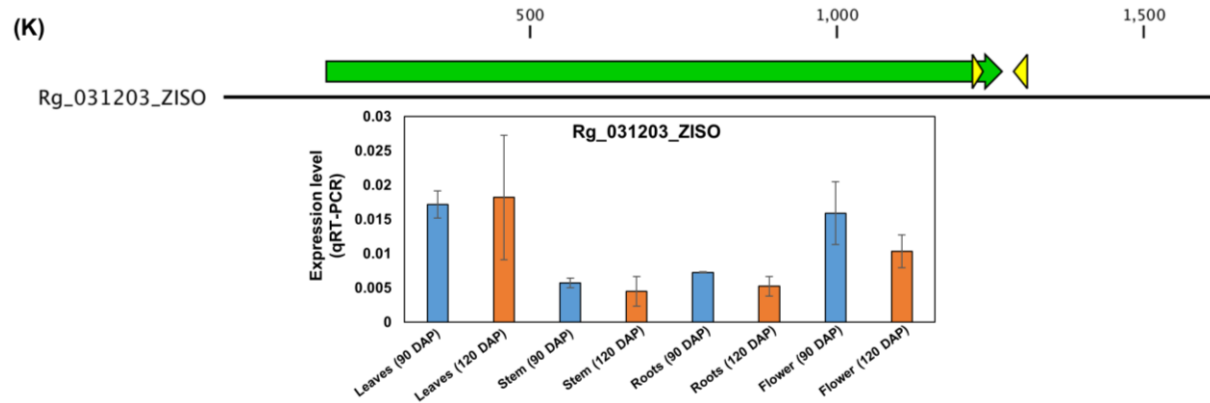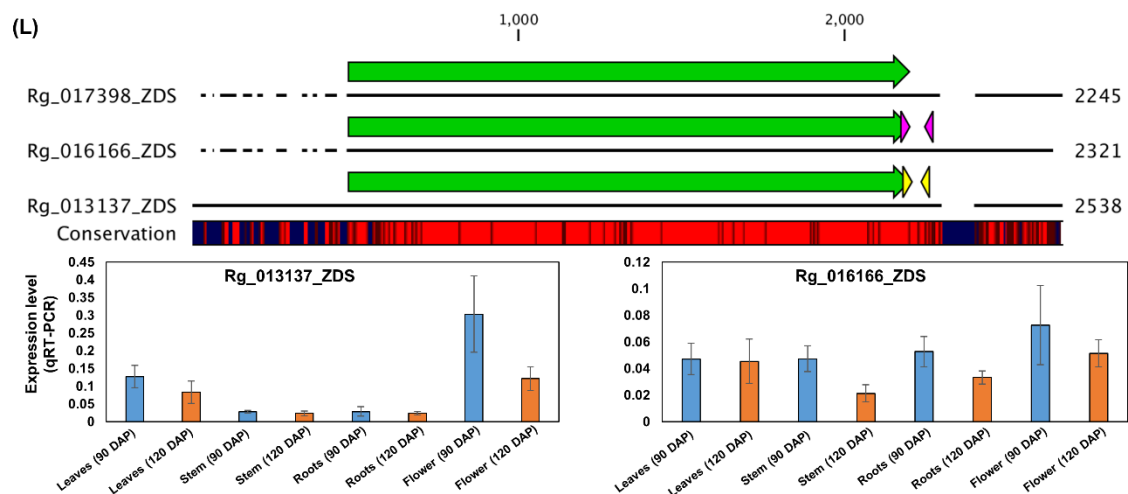

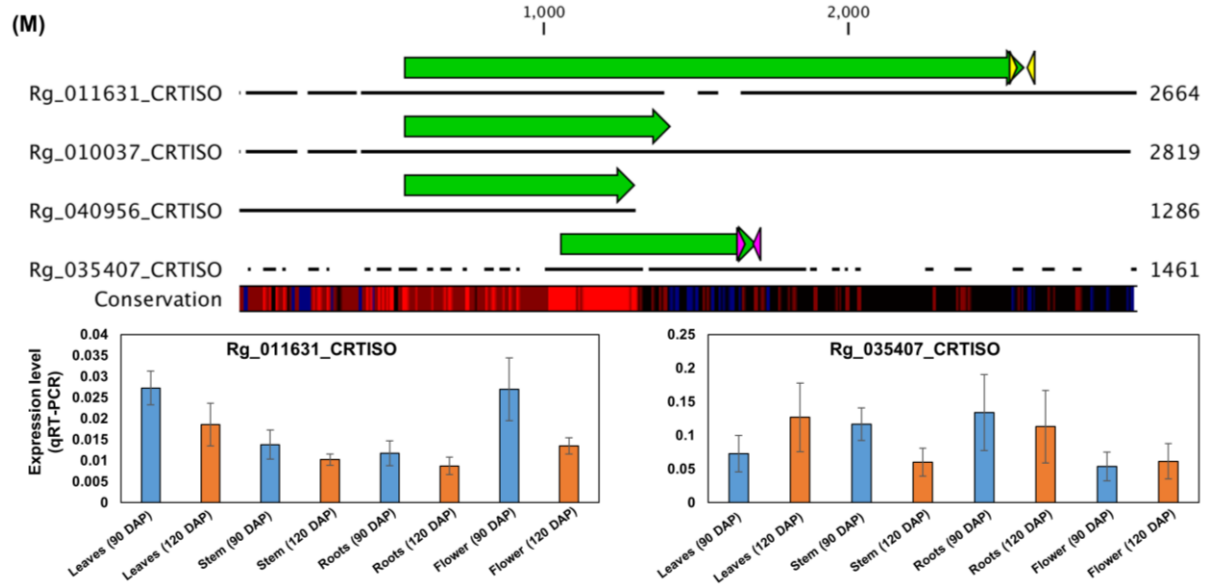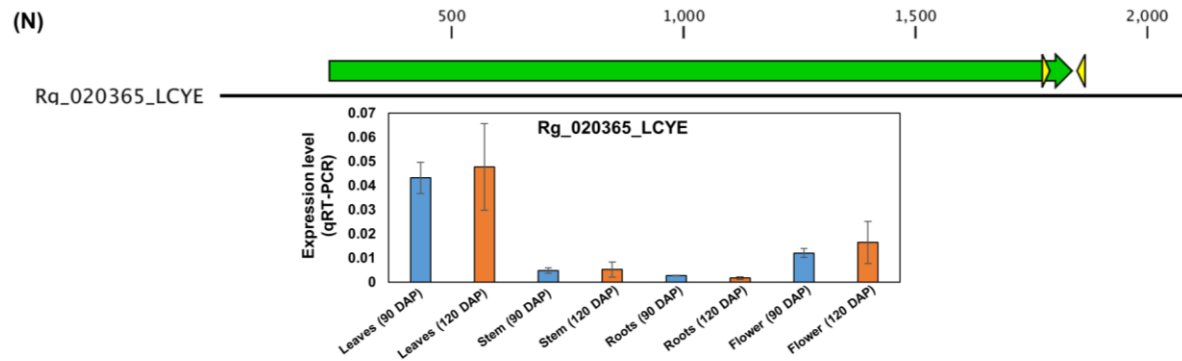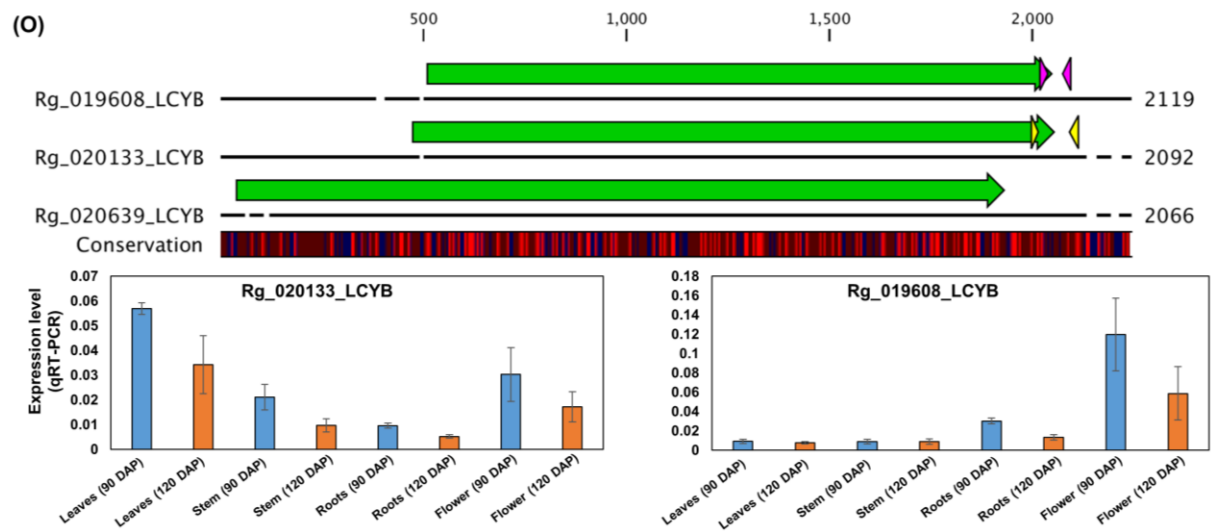

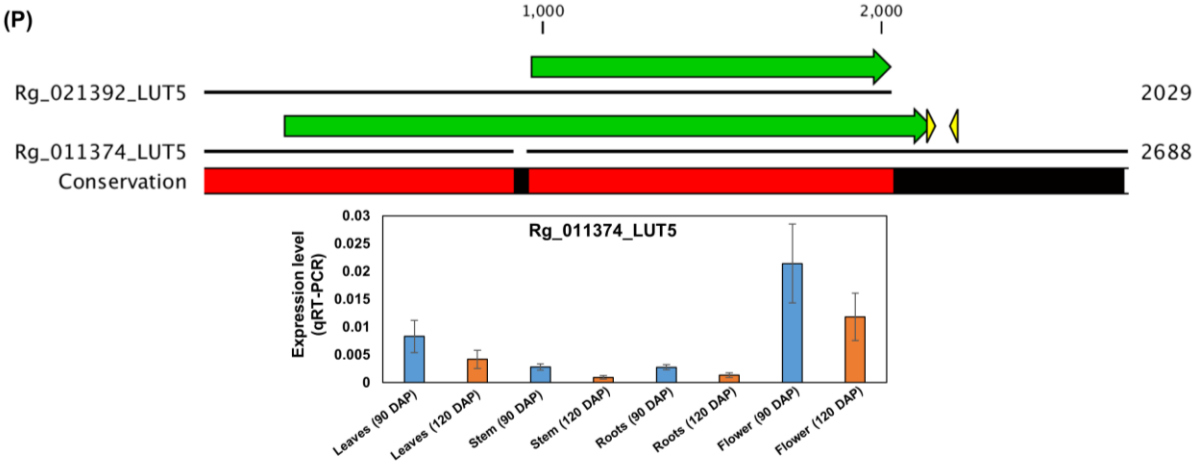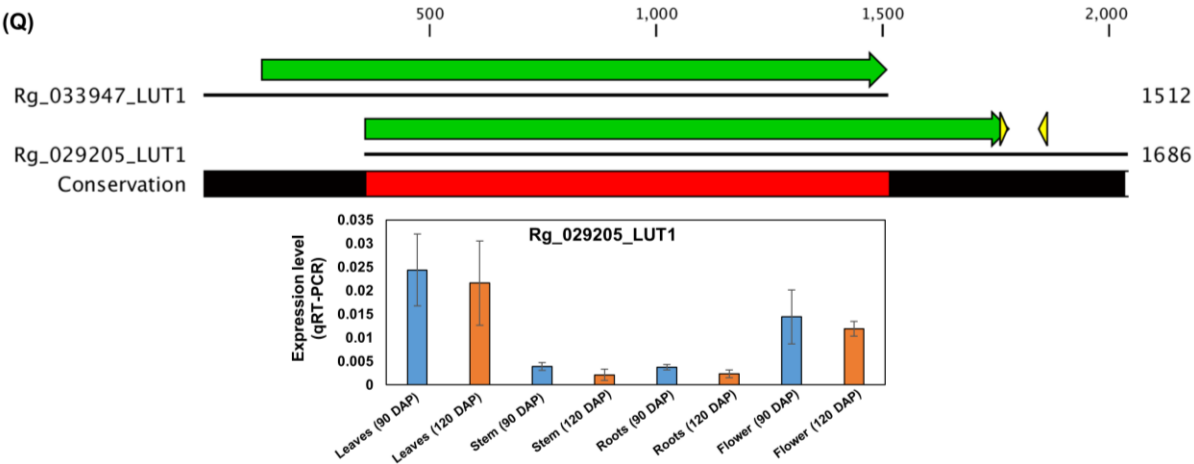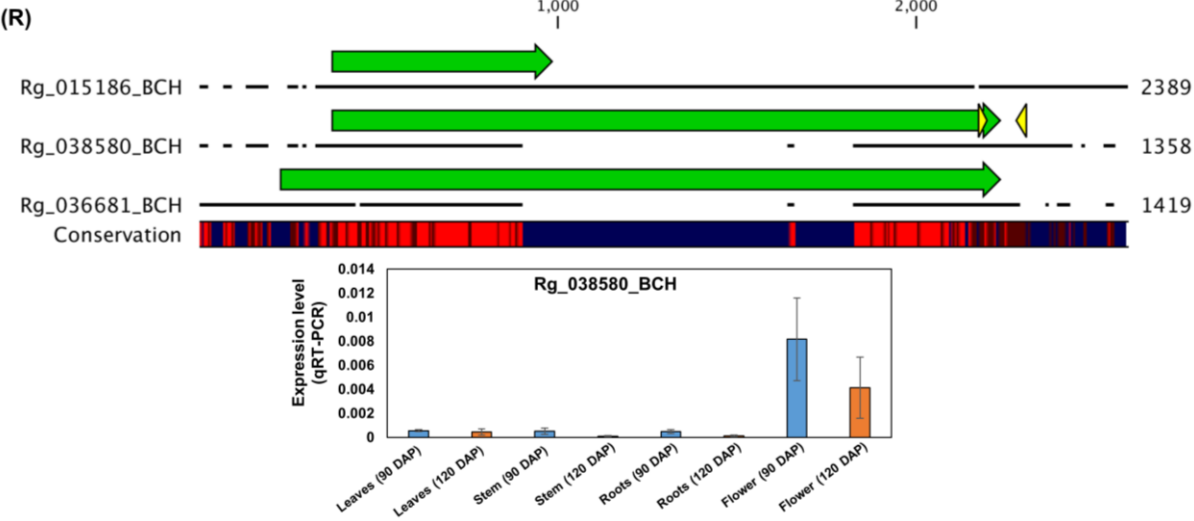

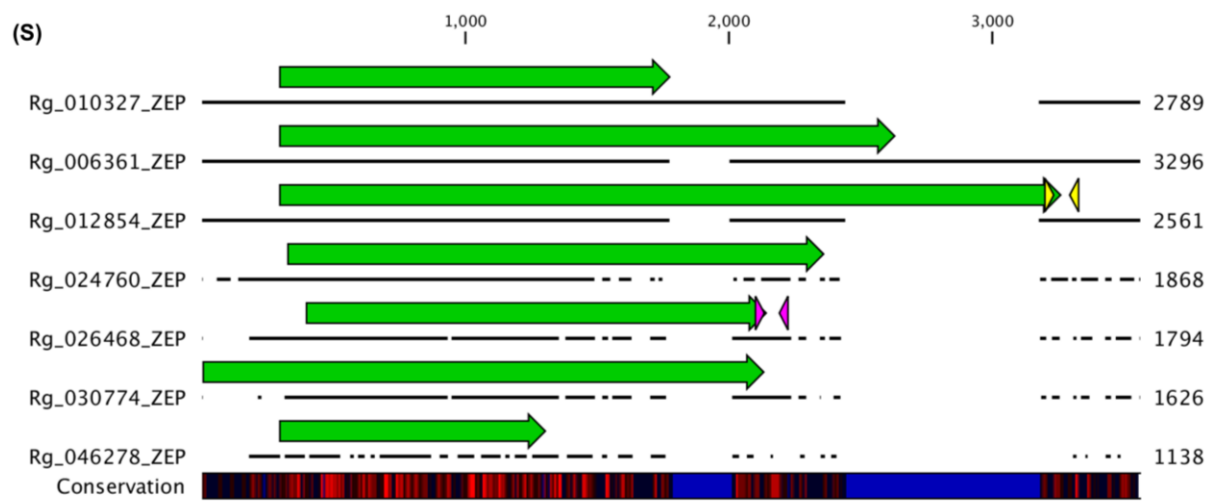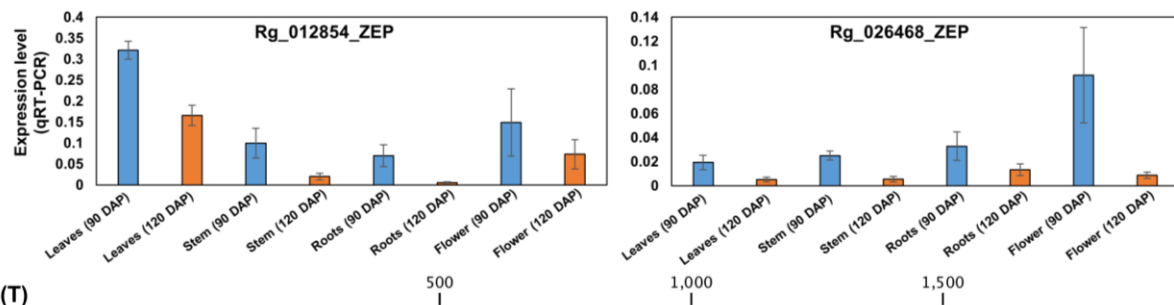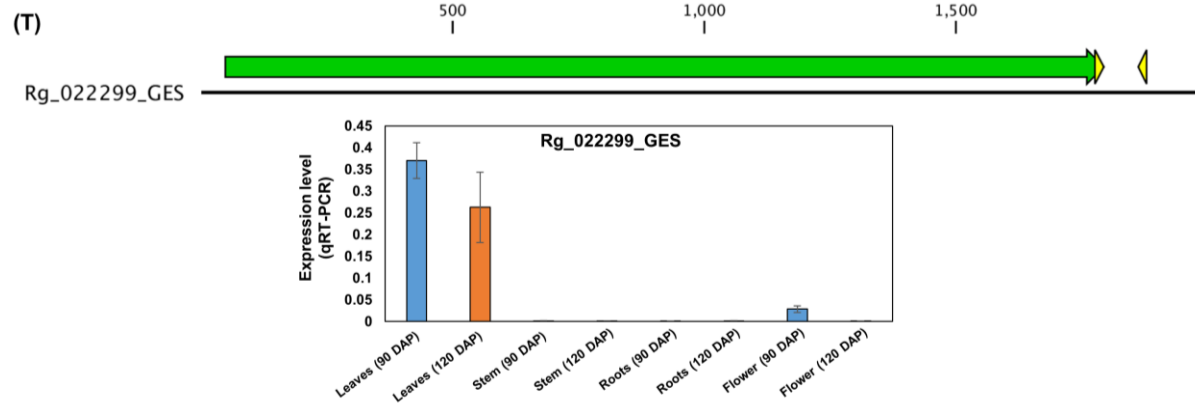

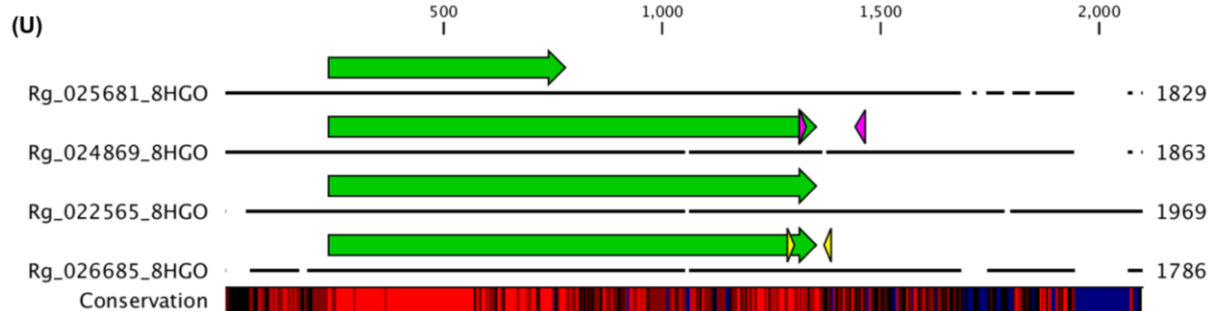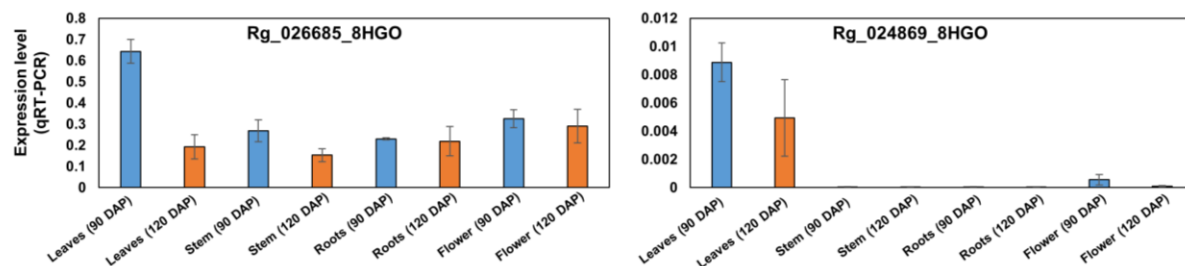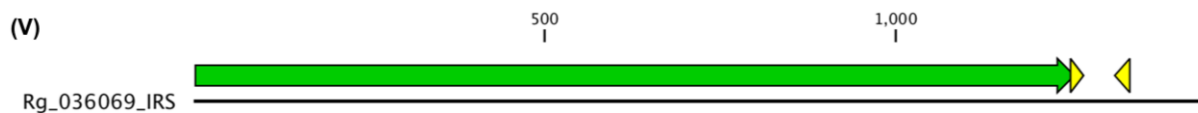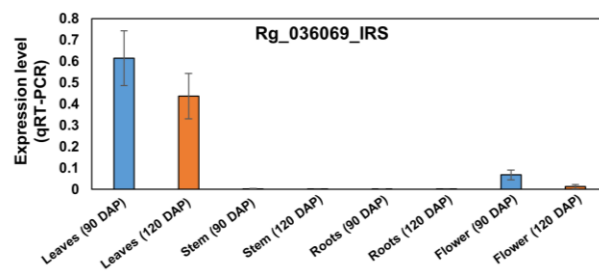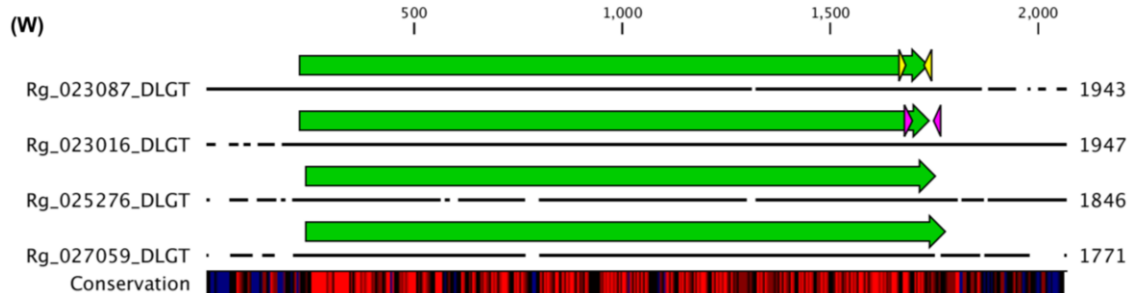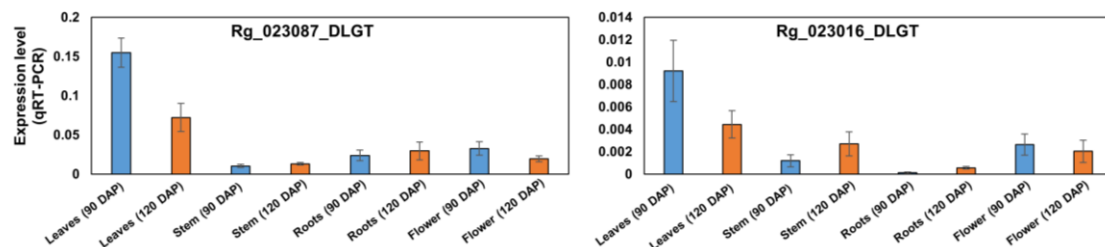



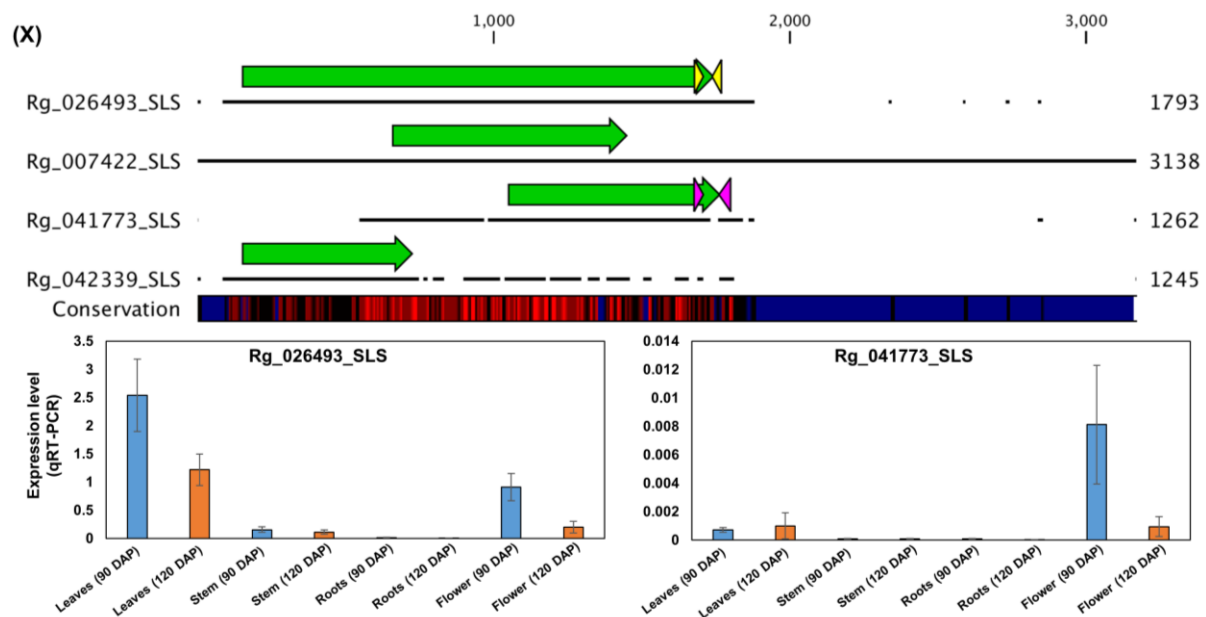

**Figure S3.** qRT-PCR analysis of the genes involved in carotenoid and iridoid product ion via the MEP pathway.

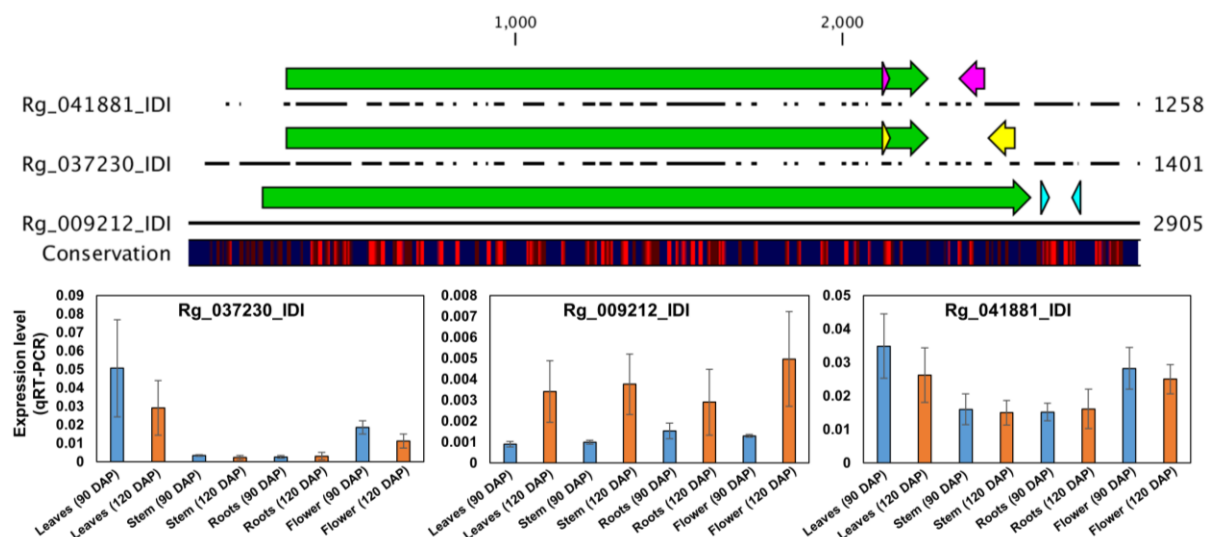

**Figure S4.** qRT-PCR test of the three IDI-encoding genes.
