# Supplementary material for: Co-Expression Analysis Reveals Differential Expression of Homologous Genes Associated with Specific Terpenoid Biosynthesis in Rehmannia glutinosa
Source: Genes (Basel). 2022 Jun 19;13(6):1092. doi: 10.3390/genes13061092 (PMC9222246; doi:10.3390/genes13061092)
Supplement: Supplementary file 1 [file genes-13-01092-s001.zip › genes-1750249-supplementary.xlsx]

## Sheet: Table S1
Table S1. Statistical results of Illumina RNA sequencing from 18 individual tissue samples.
* Decontamination indicates removal of bacterial sequences.
Samples		Raw RNA-Seq data							Adaptor & Quality Trimming		*After decontamination		Pre-processed Read (Cleaned reads)
		Sequencing Amount	Reads	Read Bases	GC(%)	AT(%)	Q20(%)	Q30(%)	Read Bases	%	Read Bases	%
Roots (60 DAP)	R. glutinosa_R1	3.4G	43169454	6518587554	58.68	41.32	97.75	94.06	5753038098	88.26	5654935888	86.75	39208062
	R. glutinosa_R2	3.6G	44842636	6771238036	54.88	45.12	97.75	94.14	6008614293	88.74	5936023200	87.67	40698882
	R. glutinosa_R3	3.8G	46717504	7054343104	53.54	46.46	97.55	93.8	6162126274	87.35	6106291135	86.56	42162586
Leaves (90 DAP)	R. glutinosa_L1	3.7G	44262930	6683702430	50.84	49.16	97.54	93.6	5834964529	87.3	5811838271	86.96	40490302
	R. glutinosa_L2	3.6G	43850428	6621414628	47.85	52.15	97.62	93.89	5800668847	87.6	5780788010	87.3	40076854
	R. glutinosa_L3	3.3G	40767238	6155852938	50.53	49.47	98.3	95.47	5512602779	89.55	5480601594	89.03	38022326
Flower (90 DAP)	R. glutinosa_F1	3.7G	34425552	5198258352	45.49	54.51	98.4	95.81	4697151927	90.36	4689054527	90.2	32234332
	R. glutinosa_F2	3.9G	36610178	5528136878	45.99	54.01	98.31	95.61	5002935941	90.5	4995046508	90.36	34146156
	R. glutinosa_F3	3.4G	42897984	6477595584	47.36	52.64	98.45	95.89	5826809051	89.95	5812723999	89.74	40361482
Roots (90 DAP)	R. glutinosa_R1	3.2G	39570242	5975106542	47.62	52.38	98	94.91	5322106562	89.07	5310581613	88.88	36446216
	R. glutinosa_R2	3.6G	50546512	7632523312	48.01	51.99	98.11	95.14	6808543880	89.2	6786680911	88.92	46725448
	R. glutinosa_R3	3.4G	41928084	6331140684	48.8	51.2	97.82	94.53	5604190957	88.52	5582065894	88.17	38262522
Stem (90 DAP)	R. glutinosa_S1	3.8G	49161824	7423435424	46.21	53.79	98.32	95.65	6680852983	90	6157586021	82.95	42311684
	R. glutinosa_S2	3.3G	41557022	6275110322	45.3	54.7	98.34	95.7	5677998287	90.48	5659792115	90.19	38770008
	R. glutinosa_S3	3.6G	46084546	6958766446	56.74	43.26	97.96	94.55	6174561006	88.73	6110412394	87.81	42457448
Roots (120 DAP)	R. glutinosa_R1	3.3G	40561074	6124722174	47.99	52.01	97.91	94.7	5457322715	89.1	5444100023	88.89	37236448
	R. glutinosa_R2	3.9G	50778928	7667618128	48.28	51.72	98.55	96.12	7043797751	91.86	7025209300	91.62	48176356
	R. glutinosa_R3	3.7G	48690190	7352218690	45.64	54.36	98.58	96.28	6722609869	91.44	6715322049	91.34	46147348

## Sheet: Table S2
Table S2. Statistical results of Pac-Bio sequencing.
*CCS indicates circular consensus subreads.
	Polymerase Read				Subread		Insert		*CCS
Sample	Base	No.	Mean length	N50	Mean length	N50	Mean length	N50	Mean length	High-quality isoforms	Low-quality isoforms	Total isoforms
R. glutinosa	39208375059	756582	51833.5	107448	2839.5	3134.5	4156.5	4650.5	3095	55093	373	55466

## Sheet: Table S3
Table S3. Mapping results of reads produced from 18 individual RNA samples.
Samples		Mapping of reads
		Clean read No.	Mapped read No.	%
Roots (60 DAP)	R. glutinosa_R1	39208062	32265218	0.8229
	R. glutinosa_R2	40698882	34203194	0.8404
	R. glutinosa_R3	42162586	33935306	0.8049
Leaves (90 DAP)	R. glutinosa_L1	40490302	30939728	0.7641
	R. glutinosa_L2	40076854	31057614	0.775
	R. glutinosa_L3	38022326	26798828	0.7048
Flower (90 DAP)	R. glutinosa_F1	32234332	24141838	0.7489
	R. glutinosa_F2	34146156	26390980	0.7729
	R. glutinosa_F3	40361482	27985042	0.6934
Roots (90 DAP)	R. glutinosa_R1	36446216	28171448	0.773
	R. glutinosa_R2	46725448	36016070	0.7708
	R. glutinosa_R3	38262522	30717798	0.8028
Stem (90 DAP)	R. glutinosa_S1	42311684	31865470	0.7531
	R. glutinosa_S2	38770008	28965872	0.7471
	R. glutinosa_S3	42457448	33594936	0.7913
Roots (120 DAP)	R. glutinosa_R1	37236448	29649002	0.7962
	R. glutinosa_R2	48176356	36581470	0.7593
	R. glutinosa_R3	46147348	28023360	0.6073

## Sheet: Table S4
Table S4. Expression information with annotation of unigenes.
Transcripts ID	Annotation					TPM																		Roots (60 DAP) vs. Roots (90 DAP)			Roots (60 DAP) vs. Roots (120 DAP)			Roots (90 DAP) vs. Roots (120 DAP)			Roots (90 DAP) vs. Leaves (90 DAP)			Roots (90 DAP) vs. Flower (90 DAP)			Roots (90 DAP) vs. Stem (90 DAP)
	NR blast	InterProScan	Araport11			Roots (60 DAP)			Roots (90 DAP)			Roots (120 DAP)			Leaves (90 DAP)			Flower (90 DAP)			Stem (90 DAP)
			Araport11	Gene name	Define	1	2	3	1	2	3	1	2	3	1	2	3	1	2	3	1	2	3	log2_FC	pvalue	padj	log2_FC	pvalue	padj	log2_FC	pvalue	padj	log2_FC	pvalue	padj	log2_FC	pvalue	padj	log2_FC	pvalue	padj
Rg_000001	midasin [Sesamum indicum]	IPR011704_ATPase, dynein-related, AAA domain; IPR027417_P-loop containing nucleoside triphosphate hydrolase; IPR012099_Midasin; IPR040848_Midasin, AAA lid domain 7; IPR003593_AAA+ ATPase domain; IPR041190_Midasin AAA lid domain 5; IPR036465_von Willebrand factor A-like domain superfamily	AT1G67120.1	.	midasin-like protein	0.56	2.57	4.99	6.48	7.76	7.46	9.61	10.58	5.86	1.32	1.81	1.94	3.65	3.98	2.92	2.24	5.35	0.7	-0.0772948	0.745952	0.873089	0.401755	0.0921503	0.23543	0.47905	0.0429632	0.1281	-1.22334	3.31112e-07	5.22439e-06	-1.11262	3.40008e-06	7.98375e-05	-1.19701	5.16477e-07	7.35111e-06
Rg_000002	auxin transport protein big [Phtheirospermum japonicum]	IPR016024_Armadillo-type fold; IPR000433_Zinc finger, ZZ-type; IPR003126_Zinc finger, UBR-type; IPR025704_E3 ubiquitin ligase, UBR4	AT3G02260.2	BIG	auxin transport protein (BIG)	2.2	11.09	22.75	32.59	32.82	31.9	19.72	23.15	17.75	9.95	17.69	15.19	31.18	29.05	28.38	28.07	53.02	4.81	-0.0205319	0.902287	0.964394	-0.450187	0.00719463	0.034625	-0.429655	0.0100016	0.0424918	-0.320711	0.0547083	0.179425	-0.0669081	0.688427	0.900286	-0.283788	0.0886985	0.238359
Rg_000003	278 kDa protein [Rehmannia virus 1] AXY55033.1 278 kDa protein [Rehmannia virus 1]	IPR002588_Alphavirus-like methyltransferase (MT) domain; IPR027417_P-loop containing nucleoside triphosphate hydrolase; IPR040910_Closterovirus 1a polyprotein, central region; IPR008749_Peptidase C42, beet yellows virus-type papain-like endopeptidase C42; IPR027351_(+) RNA virus helicase core domain	AT1G16030.1	Hsp70b	heat shock protein 70B	6.25	0	0	0	0	0	3.41	2.53	0	0	0	0	0	0	0	0	0	0	-28.4179	3.11493e-08	1.04952e-06	-3.48902	0.485093	0.699589	24.9288	1.20426e-06	2.23671e-05	0	1	1	0	1	1	0	1	1
Rg_000004	sacsin [Phtheirospermum japonicum]	IPR001841_Zinc finger, RING-type; IPR036890_Histidine kinase/HSP90-like ATPase superfamily	AT5G23110.1	.	Zinc finger, C3HC4 type (RING finger) family protein	0.39	3.28	7.16	7.77	7.13	8.32	7.76	7.21	4.48	2.13	3.48	2.51	5.27	4.7	4.68	3.85	8.89	1.01	-0.211135	0.470578	0.65846	-0.238199	0.416118	0.637469	-0.0270639	0.926026	0.978401	-0.65342	0.0255634	0.100099	-0.541083	0.0644267	0.239248	-0.814856	0.00528571	0.0260062
Rg_000005	uncharacterized protein LOC111987139 [Quercus suber]	.	ATMG00750.1	ORF119	GAG/POL/ENV polyprotein	0.09	0.23	0.75	2.62	2.04	2.74	0.75	1.05	0.01	0.5	0.71	0.59	1.79	1.6	1.42	1.3	2.75	0.29	1.29168	0.0593257	0.155996	-0.637441	0.35525	0.579272	-1.92912	0.00467982	0.0234944	-1.16353	0.087432	0.252634	-0.596922	0.379711	0.688363	-0.777164	0.252199	0.488439
Rg_000006	LOW QUALITY PROTEIN: uncharacterized protein LOC105155975 [Sesamum indicum]	IPR009291_Vacuolar protein sorting-associated protein 62; IPR031646_Vacuolar protein sorting-associated protein 13, second N-terminal domain; IPR031642_VPS13, repeated coiled region; IPR001849_Pleckstrin homology domain	AT4G17140.3	.	pleckstrin homology (PH) domain-containing protein	0	0.09	0.2	0.24	0.17	0.09	0.26	0.19	0	0.31	0	0.16	0.16	0.49	0.22	0.14	0	0	-0.354537	0.829825	0.922916	-0.368251	0.823614	0.940849	-0.013714	0.993335	1	0.995001	0.543678	0.788599	-1.77159	0.290398	0.600425	0.688148	0.674344	0.855314
Rg_000007	LOW QUALITY PROTEIN: uncharacterized protein LOC105155975 [Sesamum indicum]	IPR031642_VPS13, repeated coiled region; IPR009543_Vacuolar protein sorting-associated protein 13, SHR-binding domain; IPR009291_Vacuolar protein sorting-associated protein 62; IPR031646_Vacuolar protein sorting-associated protein 13, second N-terminal domain; IPR001849_Pleckstrin homology domain	AT4G17140.3	.	pleckstrin homology (PH) domain-containing protein	0.75	3.88	7.47	15.36	14.82	15.21	13.85	14.15	12.22	5.07	9.65	6.62	9.95	9.17	8.6	8.5	16.18	1.82	0.43256	0.0198829	0.0689882	0.519977	0.00516784	0.0266805	0.0874165	0.634265	0.794667	-0.23302	0.206116	0.45057	-0.576071	0.00182363	0.0165049	-0.861746	2.97441e-06	3.6395e-05
Rg_000008	PREDICTED: uncharacterized protein LOC105962815 isoform X1 [Erythranthe guttata]	IPR031642_VPS13, repeated coiled region; IPR031646_Vacuolar protein sorting-associated protein 13, second N-terminal domain; IPR031645_Vacuolar protein sorting-associated protein 13, C-terminal; IPR000008_C2 domain; IPR009543_Vacuolar protein sorting-associated protein 13, SHR-binding domain; IPR009291_Vacuolar protein sorting-associated protein 62; IPR010482_Peroxin domain; IPR001849_Pleckstrin …	AT1G48090.4	.	calcium-dependent lipid-binding family protein	0.33	2.62	6.5	13.62	13.51	12.29	7.69	9.04	9.38	3.36	3.97	4.41	8.54	6.82	7.73	4.33	13.62	1.33	0.775501	0.0200736	0.0694927	0.468865	0.160206	0.344253	-0.306637	0.355435	0.555786	-0.853749	0.0102444	0.0484508	-0.867425	0.00911372	0.058523	-0.91841	0.00568938	0.0276136
Rg_000009	Retrovirus-related Pol polyprotein from transposon TNT 1-94 [Vitis vinifera]	IPR012337_Ribonuclease H-like superfamily; IPR025724_GAG-pre-integrase domain; IPR001584_Integrase, catalytic core	AT4G23160.3	CRK8	cysteine-rich RECEPTOR-like kinase	0	0	0	0.6	0.76	1.02	0	0	0.03	0.07	0.65	0.12	0.43	0.56	0.5	1.71	1.94	0.13	8.15769	4.30793e-09	1.9113e-07	2.01307	0.192714	0.389781	-6.14462	8.98231e-10	3.88983e-08	-0.767667	0.304056	0.573186	0.64251	0.385717	0.693337	-0.829151	0.265193	0.504802
Rg_000010	transcription-associated protein 1 isoform X4 [Sesamum indicum]	IPR016024_Armadillo-type fold	AT2G17930.1	.	Phosphatidylinositol 3- and 4-kinase family protein with FAT domain-containing protein	0.07	0.4	0.46	1.06	0.58	0.11	1.25	0.53	0.47	0	0.75	0.75	0.84	0.34	0.57	0.37	1.48	0	-0.762926	0.524188	0.705069	-0.0924514	0.938456	1	0.670474	0.574625	0.748019	0.629184	0.598696	0.82823	-0.297873	0.803833	0.954845	-0.104219	0.930569	0.990167
Rg_000011	hypothetical protein F511_00295 [Dorcoceras hygrometricum]	IPR036875_Zinc finger, CCHC-type superfamily; IPR001878_Zinc finger, CCHC-type; IPR012337_Ribonuclease H-like superfamily; IPR013103_Reverse transcriptase, RNA-dependent DNA polymerase; IPR001584_Integrase, catalytic core; IPR025724_GAG-pre-integrase domain	AT4G23160.3	CRK8	cysteine-rich RECEPTOR-like kinase	0.43	1.83	4.39	8.83	6.1	8.53	3.63	5.14	2.57	3.03	4.83	3.3	7.87	7.97	7.2	5.64	8.93	1.18	0.367281	0.0547934	0.147069	-0.460513	0.0171753	0.0684249	-0.827794	1.18155e-05	0.000161567	-0.201843	0.28411	0.550731	-0.320555	0.089604	0.297655	-0.170422	0.363368	0.611741
Rg_000012	transcription-associated protein 1 isoform X4 [Sesamum indicum]	IPR003152_FATC domain; IPR011009_Protein kinase-like domain superfamily; IPR000403_Phosphatidylinositol 3-/4-kinase, catalytic domain; IPR016024_Armadillo-type fold; IPR003151_PIK-related kinase, FAT	AT2G17930.1	.	Phosphatidylinositol 3- and 4-kinase family protein with FAT domain-containing protein	2.19	10.54	24.65	28.94	29.13	31.35	20.11	22.81	15.6	9.12	8.85	9.79	15.47	15.98	16.67	15.48	31.38	3.37	-0.151693	0.423027	0.615584	-0.525015	0.00562854	0.0285572	-0.373322	0.0481199	0.139177	-0.78834	3.15318e-05	0.000326013	-0.650637	0.000590661	0.00662735	-1.03972	3.90776e-08	6.92375e-07
Rg_000013	uncharacterized protein LOC105180271 [Sesamum indicum]	IPR026960_Reverse transcriptase zinc-binding domain; IPR005135_Endonuclease/exonuclease/phosphatase; IPR000477_Reverse transcriptase domain; IPR036691_Endonuclease/exonuclease/phosphatase superfamily	AT3G28715.1	.	ATPase, V0/A0 complex, subunit C/D	0.61	1.78	5.13	4.14	3.1	2.9	15.14	14.64	6.69	1.6	1.87	1.21	2.92	2.61	2.62	4.17	4.07	0.34	-1.06939	5.5369e-05	0.000603777	0.997604	0.000153655	0.0014725	2.06699	3.27922e-15	4.85311e-13	-0.214563	0.420961	0.688079	-0.151078	0.570937	0.82981	-0.45281	0.0883951	0.237775
Rg_000014	serine/threonine-protein kinase smg1 [Phtheirospermum japonicum]	IPR016024_Armadillo-type fold; IPR031559_Serine/threonine-protein kinase SMG1	AT1G50030.2	TOR	target of rapamycin	0.08	0.66	1.54	0.32	0.08	0.04	1.25	0.96	0	0.03	0.08	0	0.06	0.11	0	0.03	0.11	0	-3.75035	0.00711996	0.0312367	-1.19272	0.388988	0.612391	2.55763	0.0664393	0.175323	-1.0926	0.446215	0.710104	-1.80615	0.216665	0.510787	-1.50804	0.292151	0.535103
Rg_000015	serine/threonine-protein kinase smg1 [Phtheirospermum japonicum]	IPR031559_Serine/threonine-protein kinase SMG1; IPR003152_FATC domain; IPR000403_Phosphatidylinositol 3-/4-kinase, catalytic domain; IPR016024_Armadillo-type fold; IPR011009_Protein kinase-like domain superfamily	AT1G50030.2	TOR	target of rapamycin	0.63	2.85	6	12.81	13.48	12.83	8.02	9.22	6.92	4.22	6.04	5.14	8.81	8.47	8.19	6.16	11.12	1.44	0.561556	0.000154976	0.00142749	0.11514	0.440951	0.659973	-0.446416	0.0021263	0.0124664	-0.470042	0.00129028	0.00862529	-0.812621	3.21363e-08	1.27116e-06	-0.767731	1.35842e-07	2.16899e-06
Rg_000016	hypothetical protein F511_00295 [Dorcoceras hygrometricum]	IPR036875_Zinc finger, CCHC-type superfamily; IPR001878_Zinc finger, CCHC-type; IPR012337_Ribonuclease H-like superfamily; IPR013103_Reverse transcriptase, RNA-dependent DNA polymerase; IPR001584_Integrase, catalytic core; IPR025724_GAG-pre-integrase domain	AT4G23160.3	CRK8	cysteine-rich RECEPTOR-like kinase	0.01	0.12	0.26	0.97	1.19	1.26	1.23	1.84	0.02	0.35	0.16	0.39	0.79	0.66	0.79	0.91	2.02	0.1	1.74824	0.0310887	0.0966636	1.68813	0.037594	0.123354	-0.0601163	0.939267	0.985757	-0.993095	0.211206	0.457944	-0.256632	0.745639	0.928677	-0.765041	0.333324	0.580291
Rg_000017	PREDICTED: BEACH domain-containing protein lvsA [Erythranthe guttata]	IPR023362_PH-BEACH domain; IPR013320_Concanavalin A-like lectin/glucanase domain superfamily; IPR000409_BEACH domain; IPR016024_Armadillo-type fold; IPR001680_WD40 repeat; IPR036322_WD40-repeat-containing domain superfamily; IPR036372_BEACH domain superfamily	AT1G03060.2	SPI	BEACH-DOMAIN HOMOLOG A1	0.33	1.55	3.92	7.8	7.39	7.61	6.28	7.88	8.04	1.8	2.11	2.76	6.61	7.37	5.98	9.38	17.85	1.01	0.578925	0.0340495	0.103556	0.824555	0.00255229	0.0152477	0.24563	0.361632	0.561852	-0.880902	0.00118162	0.00800311	0.270878	0.315238	0.627448	-0.338788	0.209119	0.43269
Rg_000018	E3 ubiquitin-protein ligase UPL1 [Sesamum indicum]	IPR010314_E3 ubiquitin ligase, domain of unknown function DUF913; IPR035983_HECT, E3 ligase catalytic domain; IPR016024_Armadillo-type fold; IPR015940_Ubiquitin-associated domain; IPR000569_HECT domain; IPR025527_HUWE1/Rev1, ubiquitin binding region; IPR010309_E3 ubiquitin ligase, domain of unknown function DUF908; IPR009060_UBA-like superfamily	AT1G55860.1	UPL1	LOW protein: E3 ubiquitin ligase-like protein	1.71	9.25	21.01	40.59	39.3	36.46	29.1	31.71	26.82	15.12	20.69	19.16	41.15	37.02	37.39	24.18	51.36	5.41	0.465617	0.0134569	0.0513707	0.321425	0.088251	0.228332	-0.144191	0.441852	0.638109	-0.198986	0.288979	0.555864	-0.341286	0.0691283	0.251153	-0.155556	0.406634	0.653268
Rg_000019	uncharacterized protein LOC116010891 [Ipomoea triloba]	IPR025724_GAG-pre-integrase domain	.	.	.	0.02	0.16	0.57	2.21	2.64	2.69	0.85	1.29	0.72	0.63	0.97	0.97	2.43	2.33	1.96	2.52	5	0.54	2.0376	2.11665e-12	2.41932e-10	0.855401	0.00388343	0.0212966	-1.18219	7.4852e-06	0.000109515	-0.685663	0.00921057	0.0444422	0.273154	0.291049	0.601226	-0.324707	0.209642	0.433358
Rg_000020	uncharacterized protein LOC105180271 [Sesamum indicum]	IPR026960_Reverse transcriptase zinc-binding domain; IPR005135_Endonuclease/exonuclease/phosphatase; IPR000477_Reverse transcriptase domain; IPR036691_Endonuclease/exonuclease/phosphatase superfamily	AT3G28715.1	.	ATPase, V0/A0 complex, subunit C/D	0.48	1.2	4.74	3.57	3	3.83	28.87	24.1	12.68	1.24	1.75	2.35	4.33	0	0.79	1.78	1.78	0.55	-0.704937	0.457436	0.646733	2.16795	0.0222187	0.0831659	2.87289	0.00242704	0.0138426	-0.0815023	0.931532	1	-0.714404	0.451789	0.747299	-1.24305	0.190407	0.406654
Rg_000021	hypothetical protein PHJA_001489500 [Phtheirospermum japonicum]	.	AT5G40450.2	.	A-kinase anchor-like protein	0.09	0.23	0.24	1.05	1.2	1.16	2.48	3.15	3.02	0	0.26	0.37	1.66	0.73	0.55	0.44	1.25	0.19	0.698197	0.361541	0.555302	2.3156	0.002429	0.0146353	1.6174	0.0316547	0.101865	-1.63481	0.0329077	0.12158	-0.475797	0.530512	0.803191	-0.403239	0.593761	0.801966
Rg_000022	DDE-type integrase/transposase/recombinase [Escherichia coli]	IPR001878_Zinc finger, CCHC-type	AT4G23160.3	CRK8	cysteine-rich RECEPTOR-like kinase	0.02	0.19	0.37	9.74	10.94	12.02	0.65	1.91	4.09	2.62	4.19	3.77	6.35	5.28	6.01	8.27	12.05	1.54	4.47947	5.10366e-16	1.34997e-13	2.56186	3.75864e-06	5.96057e-05	-1.91761	0.000281656	0.00237426	-0.765434	0.146521	0.360625	-0.352595	0.503407	0.783978	-1.04797	0.0467507	0.147978
Rg_000023	E3 ubiquitin-protein ligase UPL2 isoform X1 [Sesamum indicum] XP_020547512.1 E3 ubiquitin-protein ligase UPL2 isoform X1 [Sesamum indicum]	IPR025527_HUWE1/Rev1, ubiquitin binding region; IPR035983_HECT, E3 ligase catalytic domain; IPR000569_HECT domain; IPR016024_Armadillo-type fold; IPR015940_Ubiquitin-associated domain; IPR010314_E3 ubiquitin ligase, domain of unknown function DUF913; IPR010309_E3 ubiquitin ligase, domain of unknown function DUF908; IPR009060_UBA-like superfamily	AT1G55860.1	UPL1	LOW protein: E3 ubiquitin ligase-like protein	1.55	8.37	18.37	29.59	30.1	28.59	23.58	24.72	19.99	12.16	17.55	14.28	27.22	26.05	25.66	15.29	36.24	3.56	0.232336	0.23424	0.416709	0.118892	0.54312	0.749222	-0.113444	0.559458	0.736128	-0.12877	0.508088	0.761242	-0.525224	0.00703979	0.0479848	-0.30833	0.112734	0.283336
Rg_000024	F-box/FBD/LRR-repeat protein At1g13570-like [Sesamum indicum]	.	AT1G13570.1	.	F-box/RNI-like superfamily protein	0.01	0.08	0.21	13.37	13.4	16.32	0.25	5.97	0.22	4.55	4.54	5.17	5.06	4.49	5.89	14.76	16.31	1.54	5.80911	3.95174e-13	5.50032e-11	3.10758	0.000106908	0.00107198	-2.70152	0.00042392	0.00332858	-0.701034	0.359563	0.631318	-0.304732	0.690392	0.901485	-1.62979	0.0332193	0.113983
Rg_000025	hypothetical protein PHJA_001489500 [Phtheirospermum japonicum]	.	AT5G40450.2	.	A-kinase anchor-like protein	0.06	0.58	1.01	4.24	2.08	4.04	1.22	3.89	4.32	0	0.46	0	0	0.38	1.58	2.47	2.27	0.75	1.28804	0.422549	0.615199	1.4735	0.358912	0.583033	0.185467	0.90789	0.967868	-3.78018	0.0191372	0.0798639	-0.26038	0.871004	0.982856	-2.46346	0.124952	0.304931
Rg_000026	hypothetical protein PHJA_001489500 [Phtheirospermum japonicum]	.	AT5G40450.2	.	A-kinase anchor-like protein	1.15	6.05	12.06	34.42	29.27	32.3	15.98	34.28	30.28	3.74	5.48	6.85	20.53	11.95	13.98	17.8	49.54	6.31	0.862988	0.0142552	0.0536782	0.892065	0.011315	0.0493805	0.0290765	0.934002	0.982704	-1.69674	1.44439e-06	2.0109e-05	-0.095127	0.786542	0.947799	-1.20396	0.000613554	0.00418685
Rg_000027	hypothetical protein PHJA_001489500 [Phtheirospermum japonicum]	.	AT5G40450.2	.	A-kinase anchor-like protein	0	0.67	0	1.43	0.47	1.59	0	0	0.32	0.91	0	2.32	1.3	0	0.9	0.85	1.08	0.11	0.595899	0.820579	0.917651	-2.26578	0.389804	0.613127	-2.86168	0.276837	0.470402	0.85072	0.745802	0.915672	-0.635412	0.808793	0.957359	-0.82856	0.752297	0.902487
Rg_000028	hypothetical protein F511_00295 [Dorcoceras hygrometricum]	IPR012337_Ribonuclease H-like superfamily; IPR001878_Zinc finger, CCHC-type; IPR025724_GAG-pre-integrase domain; IPR013103_Reverse transcriptase, RNA-dependent DNA polymerase; IPR036875_Zinc finger, CCHC-type superfamily; IPR001584_Integrase, catalytic core	AT4G23160.3	CRK8	cysteine-rich RECEPTOR-like kinase	0	0.03	0	0.18	0.27	0.65	0.02	0	0.04	0.19	1.29	0.05	1.84	1.03	0	0	0	0	3.22179	0.0702854	0.17655	-0.811077	0.662226	0.835094	-4.03286	0.0218877	0.077402	1.17527	0.48348	0.740499	-7.45366	0.000271295	0.00348764	1.1264	0.501634	0.733572
Rg_000029	hypothetical protein [Beta vulgaris subsp. vulgaris]	IPR012337_Ribonuclease H-like superfamily; IPR026960_Reverse transcriptase zinc-binding domain; IPR000477_Reverse transcriptase domain; IPR036691_Endonuclease/exonuclease/phosphatase superfamily; IPR002156_Ribonuclease H domain	AT4G29090.1	.	Ribonuclease H-like superfamily protein	0	0	0	2.25	3.98	10.68	0	1.93	1.02	0.34	0.06	0.36	1.29	1.34	1.19	1.28	0.74	0.82	10.6896	2.15728e-10	1.43067e-08	8.3539	7.12867e-07	1.36972e-05	-2.33566	0.0526296	0.148527	-3.54582	0.00339233	0.0195065	-1.3546	0.260751	0.566584	-2.33927	0.0522276	0.161077
Rg_000030	uncharacterized protein LOC112032201 [Quercus suber]	IPR012337_Ribonuclease H-like superfamily; IPR026960_Reverse transcriptase zinc-binding domain; IPR000477_Reverse transcriptase domain; IPR002156_Ribonuclease H domain	AT2G46200.1	.	U11/U12 small nuclear ribonucleoprotein	0.06	0.1	0.27	2.64	3.27	3.33	0.25	0.88	0.14	1.16	1.24	1.34	2.42	2.69	2.52	2.62	3.72	0.46	2.8074	2.09641e-11	1.85789e-09	0.105662	0.807626	0.930669	-2.70174	1.03279e-11	7.13202e-10	-0.419642	0.274295	0.539026	-0.242358	0.52741	0.80077	-0.431746	0.258834	0.496663
Rg_000031	uncharacterized protein LOC105160162 isoform X1 [Sesamum indicum]	IPR009543_Vacuolar protein sorting-associated protein 13, SHR-binding domain; IPR031646_Vacuolar protein sorting-associated protein 13, second N-terminal domain; IPR031645_Vacuolar protein sorting-associated protein 13, C-terminal; IPR026854_Vacuolar protein sorting-associated protein 13, N-terminal domain; IPR031642_VPS13, repeated coiled region	AT5G24740.2	.	vacuolar protein sorting-associated protein, putative (DUF1162)	0.94	3.01	7.99	10.89	10.8	10.21	10.39	12.52	8.44	4.13	5.17	5.75	8.07	7.35	6.7	6.8	11.57	1.36	-0.0750438	0.556467	0.730796	0.141748	0.267752	0.483428	0.216791	0.0813207	0.202511	-0.196284	0.119458	0.314306	-0.486137	0.000129339	0.00186594	-0.678446	7.23231e-08	1.2234e-06
Rg_000032	beach domain-containing protein lvsc [Phtheirospermum japonicum]	IPR036372_BEACH domain superfamily; IPR013320_Concanavalin A-like lectin/glucanase domain superfamily; IPR000409_BEACH domain; IPR036322_WD40-repeat-containing domain superfamily; IPR001680_WD40 repeat; IPR023362_PH-BEACH domain; IPR016024_Armadillo-type fold; IPR031570_Domain of unknown function DUF4704	AT1G58230.2	.	binding protein	0.84	3.19	7.06	15.39	14.75	14.87	14.64	15.78	10.84	4.4	7.15	5.96	10.26	10.29	9.37	9.7	16.91	1.89	0.506816	6.398e-06	9.83958e-05	0.623768	3.09318e-08	8.34483e-07	0.116951	0.277761	0.471499	-0.4925	7.18854e-06	8.61029e-05	-0.470209	1.83333e-05	0.000349159	-0.735818	1.51682e-11	4.53214e-10
Rg_000033	Retrovirus-related Pol polyprotein from transposon TNT 1-94 [Cajanus cajan]	IPR012337_Ribonuclease H-like superfamily; IPR013103_Reverse transcriptase, RNA-dependent DNA polymerase	AT4G23160.3	CRK8	cysteine-rich RECEPTOR-like kinase	0.11	0.33	0.84	4.9	5.26	5.52	2.1	2.53	1.75	2.44	4.81	2.91	6.58	6.45	6.63	8.09	13.04	1.08	2.11081	4.17072e-25	5.43272e-22	1.05202	4.34322e-07	8.77761e-06	-1.05879	6.00274e-09	2.10186e-07	0.221359	0.215163	0.463433	0.577667	0.00115876	0.011457	0.175275	0.323229	0.569408
Rg_000034	hypothetical protein PHJA_001489500 [Phtheirospermum japonicum]	.	AT5G40450.2	.	A-kinase anchor-like protein	0	0.45	1.53	1.21	0	1	2.59	3.22	0.73	0	0	0.18	1.24	0.5	0.98	1.41	1.78	0	-0.838559	0.689721	0.832106	0.913083	0.663617	0.836146	1.75164	0.40378	0.603628	-2.6995	0.202235	0.445303	0.252937	0.904133	0.992893	0.168709	0.935946	0.992576
Rg_000035	protein rst1 [Phtheirospermum japonicum]	IPR022542_Domain of unknown function DUF3730; IPR016024_Armadillo-type fold	AT3G27670.1	RST1	ARM repeat superfamily protein	0.05	0.13	0.43	0.54	0.64	0.71	3	1.83	0.15	0.3	0.18	0.38	0.89	0.5	0.79	0.4	1.45	0.13	0.14464	0.827248	0.921521	1.67976	0.0108566	0.0478215	1.53512	0.0172014	0.0645923	-0.213006	0.744844	0.915235	0.203311	0.755062	0.933035	0.0440771	0.945862	0.997387
Rg_000036	uncharacterized protein LOC105166542 isoform X1 [Sesamum indicum]	IPR000477_Reverse transcriptase domain; IPR036691_Endonuclease/exonuclease/phosphatase superfamily; IPR002156_Ribonuclease H domain; IPR026960_Reverse transcriptase zinc-binding domain; IPR012337_Ribonuclease H-like superfamily; IPR005135_Endonuclease/exonuclease/phosphatase	AT5G22450.2	.	spectrin beta chain, brain	0.51	1.75	4.03	13.52	14.93	14.04	2.64	5.41	2.44	6.43	5.45	6.24	12.19	9.26	9.31	12.52	18.32	1.75	1.22923	3.44243e-08	1.14202e-06	-0.582858	0.00987258	0.0444166	-1.81209	2.20177e-16	4.10788e-14	-0.320498	0.14256	0.354016	-0.262936	0.229051	0.527266	-0.623621	0.00428392	0.0218041
Rg_000037	.	.	.	.	.	0.08	0.33	0.94	6.59	24.81	7.41	22.74	36.71	22.11	5.71	35.54	9.08	13	13.98	11.84	8.01	13.25	1.48	3.47775	2.91856e-10	1.8691e-08	4.76583	5.61546e-18	9.29675e-16	1.28808	0.0168839	0.0636713	1.13274	0.0356652	0.129594	-0.599268	0.267094	0.574291	-0.163698	0.761538	0.907491
Rg_000038	hypothetical protein F3Y22_tig00111743pilonHSYRG00047 [Hibiscus syriacus]	IPR001878_Zinc finger, CCHC-type; IPR013103_Reverse transcriptase, RNA-dependent DNA polymerase; IPR001584_Integrase, catalytic core; IPR012337_Ribonuclease H-like superfamily; IPR025724_GAG-pre-integrase domain; IPR036875_Zinc finger, CCHC-type superfamily; IPR025314_Domain of unknown function DUF4219	AT4G23160.3	CRK8	cysteine-rich RECEPTOR-like kinase	0.02	0.08	0.15	1.44	1.48	1.51	0.18	0.61	0.63	1.06	2.08	1.41	3.02	2.6	1.97	2.12	4.08	0.1	2.61125	1.30253e-06	2.54634e-05	1.26883	0.0204915	0.0781715	-1.34241	0.00646564	0.0302844	0.893244	0.0649071	0.203619	0.30838	0.525708	0.799649	0.617776	0.20123	0.421489
Rg_000039	uncharacterized protein LOC101212255 isoform X5 [Cucumis sativus]	IPR013103_Reverse transcriptase, RNA-dependent DNA polymerase	AT4G23160.3	CRK8	cysteine-rich RECEPTOR-like kinase	0.13	0.74	1.74	0.77	0.65	0.85	1.38	1.24	0.1	0.36	0.61	0.49	0.95	0.82	0.77	0.78	1.33	0.2	-1.56388	0.00259713	0.0141073	-1.15744	0.0258415	0.0933162	0.406436	0.433491	0.630827	0.215031	0.680622	0.879038	0.330232	0.526988	0.800535	0.0107697	0.98349	1
Rg_000040	uncharacterized protein LOC105178313 [Sesamum indicum] XP_011100075.1 uncharacterized protein LOC105178313 [Sesamum indicum]	IPR028107_Spatacsin, C-terminal domain	AT4G39420.2	.	spatacsin carboxy-terminus protein	0.55	2.15	4.63	6.47	6.17	6	3.54	4.47	4.3	2.87	2.97	3.19	7.09	6.81	6.11	5.82	9.93	1.02	-0.169525	0.312957	0.504734	-0.494288	0.00359471	0.020033	-0.324762	0.0496338	0.14229	-0.144165	0.385618	0.656004	0.00606847	0.970802	1	-0.0448461	0.785	0.919833
Rg_000041	Prohibitin-like protein [Handroanthus impetiginosus]	IPR005162_Retrotransposon gag domain	AT4G28510.1	PHB1	prohibitin 1	0.02	0.02	0.08	2.3	2.08	2.39	0.13	0.75	0.16	0.6	0.49	0.69	0.76	0.91	0.92	1.37	2.16	0.37	4.20104	2.7232e-13	3.94962e-11	1.67072	0.00454533	0.0240986	-2.53033	1.94621e-07	4.55167e-06	-1.01878	0.0322873	0.119824	-0.433307	0.359775	0.670863	-1.52651	0.00133693	0.00818776
Rg_000042	cytochrome P450 78A7-like [Hibiscus syriacus]	IPR021109_Aspartic peptidase domain superfamily; IPR001584_Integrase, catalytic core; IPR000953_Chromo/chromo shadow domain; IPR041588_Integrase zinc-binding domain; IPR000477_Reverse transcriptase domain; IPR041577_Reverse transcriptase/retrotransposon-derived protein, RNase H-like domain; IPR016197_Chromo-like domain superfamily; IPR012337_Ribonuclease H-like superfamily; IPR023780_Chromo domai…	ATMG00860.1	ORF158	DNA/RNA polymerases superfamily protein	0.12	1.07	0.69	3.26	5.8	3.07	1.09	2.28	2.84	7.08	110.66	10.94	19.12	33.66	14.63	21.1	19.28	0.6	0.993754	0.220968	0.400782	0.342196	0.673769	0.84329	-0.651558	0.420239	0.618837	4.12616	3.13771e-07	4.97944e-06	1.62137	0.0445532	0.18612	2.32031	0.00402859	0.0207236
Rg_000043	polyprotein [Broad bean wilt virus 2]	IPR001205_RNA-directed RNA polymerase, C-terminal domain; IPR004004_Helicase/polymerase/peptidase polyprotein, Calicivirus-type; IPR000605_Helicase, superfamily 3, single-stranded DNA/RNA virus; IPR000199_Peptidase C3A/C3B, picornaviral; IPR009003_Peptidase S1, PA clan; IPR027417_P-loop containing nucleoside triphosphate hydrolase	AT1G27600.2	IRX9-L	Nucleotide-diphospho-sugar transferases superfamily protein	0.05	0.09	0.09	9.9	8.42	7.04	0.12	1.57	0.28	0.99	0.52	1.28	2.72	2.29	3.52	4.68	6.08	0.59	4.75274	1.04916e-12	1.28881e-10	1.21222	0.0722521	0.197892	-3.54051	2.48114e-08	7.39691e-07	-2.23663	0.00039575	0.00309199	-1.02386	0.103536	0.327135	-1.6977	0.00695696	0.0326417
Rg_000044	uncharacterized protein LOC105162011 [Sesamum indicum]	IPR012337_Ribonuclease H-like superfamily; IPR002156_Ribonuclease H domain; IPR041577_Reverse transcriptase/retrotransposon-derived protein, RNase H-like domain; IPR041588_Integrase zinc-binding domain; IPR000477_Reverse transcriptase domain; IPR001584_Integrase, catalytic core; IPR005162_Retrotransposon gag domain	.	.	.	0.04	0.09	0.37	1.1	1.07	1.55	1.23	1.31	0.81	0.28	0.57	0.38	0.69	0.72	0.73	1.04	1.92	0.2	1.50573	9.75193e-07	1.98656e-05	1.57904	3.35125e-07	6.97287e-06	0.0733156	0.778563	0.893804	-0.756519	0.0059742	0.031186	-0.0767936	0.772548	0.941282	-0.949677	0.000441346	0.00314921
Rg_000045	PREDICTED: serine/threonine-protein kinase ATM [Erythranthe guttata]	IPR003151_PIK-related kinase, FAT	AT3G48190.2	ATM	Serine/Threonine-kinase ATM-like protein	0	0	0.16	0.6	0	0	0	0.12	0	0	0	0	0	0	0	0	0	0.09	1.15214	NA	NA	-1.02441	NA	NA	-2.17655	NA	NA	-6.10494	NA	NA	-0.0476417	NA	NA	-6.62492	NA	NA
Rg_000046	putative RNA-directed DNA polymerase [Rosa chinensis]	IPR001878_Zinc finger, CCHC-type; IPR036875_Zinc finger, CCHC-type superfamily	ATMG00810.1	ORF240B	DNA/RNA polymerases superfamily protein	0	0.02	0.02	0.64	0.47	0.4	0.07	0.09	0.03	0.77	1.23	1.23	1.22	1.11	1.46	2	3.22	0.18	3.37582	1.74289e-08	6.40361e-07	0.608767	0.362056	0.58613	-2.76705	2.68557e-10	1.33031e-08	1.98736	2.35999e-10	6.12989e-09	1.8304	6.09123e-09	2.80676e-07	1.2124	0.000120281	0.00100759
Rg_000047	polyprotein [Broad bean wilt virus 2]	IPR000199_Peptidase C3A/C3B, picornaviral; IPR009003_Peptidase S1, PA clan; IPR000605_Helicase, superfamily 3, single-stranded DNA/RNA virus; IPR027417_P-loop containing nucleoside triphosphate hydrolase	AT1G27600.2	IRX9-L	Nucleotide-diphospho-sugar transferases superfamily protein	0.05	0.07	0.11	0.58	0.34	0.42	1.62	1.84	0.07	0.18	0.06	0.08	0	0.22	0.05	0	0.57	0.09	0.42735	0.721058	0.85474	1.96502	0.0998142	0.248921	1.53767	0.191196	0.367902	-1.06953	0.370518	0.641907	-0.540098	0.6496	0.877967	-2.41847	0.0456686	0.145379
Rg_000048	PREDICTED: serine/threonine-protein kinase ATM [Erythranthe guttata]	IPR011009_Protein kinase-like domain superfamily; IPR003152_FATC domain; IPR003151_PIK-related kinase, FAT; IPR000403_Phosphatidylinositol 3-/4-kinase, catalytic domain	AT3G48190.2	ATM	Serine/Threonine-kinase ATM-like protein	0.41	2.15	4.62	7.21	7.26	7.49	8.14	7.5	5.71	2.6	2.29	2.87	3.22	3.71	3.34	3.03	8.02	0.96	0.183107	0.480536	0.667367	0.388091	0.135259	0.30737	0.204983	0.423257	0.621683	-0.594929	0.0212519	0.0868249	-0.630454	0.0147571	0.0843077	-1.24102	1.60535e-06	2.07847e-05
Rg_000049	LOW QUALITY PROTEIN: BEACH domain-containing protein C2 [Sesamum indicum]	IPR023362_PH-BEACH domain; IPR013320_Concanavalin A-like lectin/glucanase domain superfamily; IPR036322_WD40-repeat-containing domain superfamily; IPR001680_WD40 repeat; IPR000409_BEACH domain; IPR036372_BEACH domain superfamily; IPR031570_Domain of unknown function DUF4704	AT2G45540.1	.	WD-40 repeat family protein / beige-like protein	0.72	3.18	8.62	17.07	15.42	14.94	16.7	16.71	10.86	5.6	4.9	7.16	19.27	18.09	15.41	16.78	33.88	2.44	0.532071	0.0168434	0.0609379	0.672369	0.00254581	0.0152155	0.140298	0.523455	0.706933	-0.513061	0.0202415	0.0834986	0.201397	0.360468	0.671572	0.00630492	0.977127	1
Rg_000050	PREDICTED: uncharacterized protein LOC105975464 [Erythranthe guttata]	IPR001878_Zinc finger, CCHC-type; IPR036875_Zinc finger, CCHC-type superfamily	AT4G23160.3	CRK8	cysteine-rich RECEPTOR-like kinase	0	1.63	2.3	30.25	28.69	37.19	0	3.12	0.36	10.2	17.89	13.36	25.54	21.43	20.3	28.15	38.2	4.74	3.40436	0.0115472	0.0455457	-1.30319	0.334448	0.557093	-4.70756	0.000478877	0.0036827	-0.358119	0.790157	0.938764	-0.22331	0.868208	0.981805	-0.674609	0.616169	0.818184
Rg_000051	uncharacterized protein LOC105160162 isoform X3 [Sesamum indicum]	IPR031645_Vacuolar protein sorting-associated protein 13, C-terminal	AT5G24740.1	.	vacuolar protein sorting-associated protein, putative (DUF1162)	0.15	0.6	1.4	1.4	1.39	1.05	1.36	1.59	0.84	0.78	1.09	0.55	0.6	1.15	0.89	1.15	1.38	0.25	-0.644527	0.03011	0.0944093	-0.436633	0.143433	0.319336	0.207894	0.475803	0.667724	0.207369	0.481305	0.739022	-0.101558	0.732667	0.92238	-0.657214	0.0272825	0.0981419
Rg_000052	e1a-binding protein p400 [Phtheirospermum japonicum]	IPR014012_Helicase/SANT-associated domain	AT3G24870.4	.	Helicase/SANT-associated, DNA binding protein	0.11	0.76	1.55	2.31	1.84	2.83	1.35	2.17	1.1	0.52	0.58	0.64	0.77	0.75	0.88	1.13	1.51	0.3	0.129186	0.679747	0.825305	-0.248788	0.430951	0.650963	-0.377974	0.217928	0.401569	-1.11118	0.000421866	0.00327165	-0.848038	0.00669998	0.0461508	-1.68642	9.28652e-08	1.53718e-06
Rg_000053	PREDICTED: uncharacterized protein LOC105975464 [Erythranthe guttata]	IPR001878_Zinc finger, CCHC-type; IPR036875_Zinc finger, CCHC-type superfamily	AT4G23160.3	CRK8	cysteine-rich RECEPTOR-like kinase	0.07	0	0	0.2	0.36	0.44	1.09	0	2.02	0.17	0.48	0.08	0.23	0.77	0.32	0.78	0.78	0	0.422848	0.805445	0.909374	2.47871	0.147986	0.326164	2.05586	0.225749	0.411237	0.324315	0.848933	0.968557	0.358955	0.83305	0.967317	0.234647	0.890271	0.971827
Rg_000054	Retrovirus-related Pol polyprotein from transposon TNT 1-94 [Vitis vinifera]	IPR001878_Zinc finger, CCHC-type; IPR036875_Zinc finger, CCHC-type superfamily	AT4G23160.3	CRK8	cysteine-rich RECEPTOR-like kinase	0	0	0	7.54	7.93	10.46	0	1.31	0	1.92	3.37	3.22	4.05	2.17	7.48	4.01	6.57	0.87	22.959	5.29848e-35	1.68692e-31	18.6615	1.40382e-23	5.18266e-21	-4.29753	0.0029525	0.0161883	-0.752151	0.601502	0.829727	-0.924329	0.52105	0.796703	-1.05835	0.462404	0.701922
Rg_000055	hypothetical protein CDL12_09954 [Handroanthus impetiginosus]	IPR031937_PNN-interacting serine/arginine-rich protein	AT1G70620.3	.	cyclin-like protein	0.46	1.71	3.1	4.56	4.85	4.7	3.35	3.94	1.85	1.91	2.53	2.28	3.81	4.36	3.56	3.96	5.7	0.78	-0.175281	0.316475	0.508449	-0.589144	0.000916823	0.0066049	-0.413863	0.016147	0.0616021	-0.190946	0.269475	0.53322	-0.185624	0.283191	0.592452	-0.416477	0.0152242	0.061968
Rg_000056	uncharacterized protein LOC105180271 [Sesamum indicum]	IPR026960_Reverse transcriptase zinc-binding domain; IPR005135_Endonuclease/exonuclease/phosphatase; IPR036691_Endonuclease/exonuclease/phosphatase superfamily; IPR000477_Reverse transcriptase domain	AT3G28715.1	.	ATPase, V0/A0 complex, subunit C/D	0.46	2.03	11.94	15.24	14.48	15.59	15.48	21.75	18.42	4.46	5.18	5.33	10.45	7.82	8.59	13.88	18.17	1.78	0.551504	0.113849	0.250832	1.11424	0.00139882	0.00931247	0.562736	0.104562	0.242049	-0.708326	0.0416984	0.14598	-0.295975	0.394347	0.701567	-0.907838	0.00898815	0.0403283
Rg_000057	chromatin structure-remodeling complex protein SYD [Sesamum indicum]	IPR014001_Helicase superfamily 1/2, ATP-binding domain; IPR000330_SNF2-related, N-terminal domain; IPR001650_Helicase, C-terminal; IPR027417_P-loop containing nucleoside triphosphate hydrolase; IPR029295_Snf2, ATP coupling domain; IPR014978_Glutamine-Leucine-Glutamine, QLQ	AT2G28290.5	SYD	P-loop containing nucleoside triphosphate hydrolases superfamily protein	0.83	3.72	6.24	12.65	11.81	12.65	11.61	11.17	5.74	2.88	3.06	1.54	5.72	6.56	6.26	3.8	7.8	0.6	0.213679	0.420827	0.613597	0.0497115	0.851697	0.958783	-0.163968	0.533777	0.715575	-1.41538	1.07856e-07	1.85514e-06	-1.54459	7.25253e-09	3.28613e-07	-1.14165	1.60127e-05	0.000167873
Rg_000058	chromatin structure-remodeling complex protein SYD [Sesamum indicum]	IPR027417_P-loop containing nucleoside triphosphate hydrolase; IPR029295_Snf2, ATP coupling domain; IPR014001_Helicase superfamily 1/2, ATP-binding domain; IPR000330_SNF2-related, N-terminal domain; IPR014978_Glutamine-Leucine-Glutamine, QLQ; IPR001650_Helicase, C-terminal	AT2G28290.5	SYD	P-loop containing nucleoside triphosphate hydrolases superfamily protein	0.01	0.08	0.1	0.3	0.45	0.45	1.2	1.17	0.31	0.13	0.4	0.08	0.44	0.67	0.66	0.29	0.53	0.06	1.10831	0.0570937	0.151623	2.42946	2.52319e-05	0.000313749	1.32115	0.0100158	0.0425422	-0.178829	0.737505	0.911392	-0.262451	0.623785	0.862368	0.407756	0.431779	0.676001
Rg_000059	Retrovirus-related Pol polyprotein from transposon TNT 1-94 [Vitis vinifera]	IPR012337_Ribonuclease H-like superfamily; IPR001584_Integrase, catalytic core; IPR025724_GAG-pre-integrase domain	AT4G23160.3	CRK8	cysteine-rich RECEPTOR-like kinase	0	0	0	0.75	1.64	2.5	0	0.09	0	0.89	3.24	0.77	4.16	6.39	2.43	8.39	7.16	0.44	8.67449	6.63404e-10	3.79448e-08	3.03018	0.0411709	0.131918	-5.64432	4.40574e-10	2.06532e-08	0.765596	0.318831	0.589411	1.65654	0.0307864	0.143412	1.21624	0.112726	0.283335
Rg_000060	chromatin structure-remodeling complex protein SYD [Sesamum indicum]	IPR027417_P-loop containing nucleoside triphosphate hydrolase; IPR014001_Helicase superfamily 1/2, ATP-binding domain; IPR029295_Snf2, ATP coupling domain; IPR014978_Glutamine-Leucine-Glutamine, QLQ; IPR000330_SNF2-related, N-terminal domain; IPR001650_Helicase, C-terminal	AT2G28290.5	SYD	P-loop containing nucleoside triphosphate hydrolases superfamily protein	1.87	7.31	16.6	20.01	20.05	18.39	16.88	18.73	12.57	6.53	9	10.45	18.84	14.54	16.31	15.62	27.38	3.62	-0.309676	0.0625108	0.162233	-0.347026	0.0372621	0.122558	-0.0373502	0.821118	0.91895	-0.285706	0.0850542	0.247848	-0.0600966	0.716858	0.914458	-0.383022	0.02058	0.078637
Rg_000061	uncharacterized protein LOC111380514 [Olea europaea var. sylvestris]	IPR005162_Retrotransposon gag domain	.	.	.	0	0	0.04	7.49	9.81	9.53	0	0.88	0.04	2.62	4.94	3.19	6.78	6.46	6.3	7.66	10.07	1.11	8.38406	NA	NA	3.55927	NA	NA	-4.82479	NA	NA	-0.472072	NA	NA	-0.351478	NA	NA	-0.615816	NA	NA
Rg_000062	polyprotein [Broad bean wilt virus 2]	IPR000199_Peptidase C3A/C3B, picornaviral; IPR009003_Peptidase S1, PA clan; IPR000605_Helicase, superfamily 3, single-stranded DNA/RNA virus; IPR027417_P-loop containing nucleoside triphosphate hydrolase	AT1G27600.2	IRX9-L	Nucleotide-diphospho-sugar transferases superfamily protein	0	0.05	0.15	2.66	2.27	2.34	0.07	1.32	2.84	0.65	0.72	0.71	1.55	1.43	1.03	2.14	2.37	0.38	4.05207	1.76859e-06	3.3098e-05	3.68304	1.44119e-05	0.000192634	-0.369031	0.635798	0.795847	-0.903833	0.247603	0.506154	-0.254011	0.744696	0.928285	-1.00831	0.196365	0.414855
Rg_000063	kinesin-like protein KIN-12D [Sesamum indicum]	IPR001752_Kinesin motor domain; IPR027417_P-loop containing nucleoside triphosphate hydrolase	AT3G19050.1	POK2	phragmoplast orienting kinesin 2	0.14	0.65	2.13	6.55	4.01	3.99	1.94	1.94	2.48	0.33	0.69	0.93	1.92	1.66	1.77	1.59	5.96	0.3	0.998939	0.0156201	0.0575465	0.125107	0.763288	0.903339	-0.873832	0.0319983	0.10266	-2.01429	1.18702e-06	1.67878e-05	-0.943581	0.0211142	0.10961	-1.56929	0.000126351	0.00105363
Rg_000064	PREDICTED: uncharacterized protein LOC105962815 isoform X2 [Erythranthe guttata]	IPR009291_Vacuolar protein sorting-associated protein 62; IPR031642_VPS13, repeated coiled region; IPR001849_Pleckstrin homology domain	AT1G48090.2	.	calcium-dependent lipid-binding family protein	0.02	0.17	0.18	0.42	0.76	0.43	0.24	0.5	0.05	0.25	0.12	0.2	0.2	0.3	0.38	0.49	0.94	0.14	0.486617	0.421028	0.613767	-0.422928	0.49409	0.707291	-0.909545	0.123379	0.272117	-0.533103	0.366918	0.638468	0.26742	0.645297	0.875217	-1.00947	0.0872216	0.23555
Rg_000065	upf0378 protein kiaa0100 [Phtheirospermum japonicum]	IPR019441_FMP27, GFWDK domain; IPR019443_FMP27, C-terminal	AT1G58250.1	SAB	HYPERSENSITIVE TO PI STARVATION 4	0	0.62	0.2	0	0.35	0	0	0.15	0	0.35	4.25	0.63	3.46	2.65	1.95	0.2	0.88	0	-2.7472	0.223178	0.403509	-3.95823	0.0823733	0.217569	-1.21103	0.596023	0.765038	4.59697	0.0411136	0.144394	1.13163	0.616494	0.858504	4.32298	0.054762	0.166835
Rg_000066	myosin-12 [Phtheirospermum japonicum]	IPR001609_Myosin head, motor domain; IPR004009_Myosin, N-terminal, SH3-like; IPR027417_P-loop containing nucleoside triphosphate hydrolase	AT2G31900.4	XIF	myosin-like protein XIF	0.02	0.11	0.38	1.02	0.91	1.03	0.88	1.02	0.66	0.23	0.08	0.28	0.74	0.57	0.58	0.67	0.93	0.08	1.14892	0.00194355	0.0112057	1.18382	0.00151691	0.00994522	0.0349093	0.916046	0.972467	-1.39451	0.00011097	0.0010029	-0.699763	0.042372	0.179598	-0.800625	0.0181802	0.0713052
Rg_000067	serine/threonine-protein kinase/endoribonuclease IRE1a-like isoform X1 [Sesamum indicum] XP_011096965.1 serine/threonine-protein kinase/endoribonuclease IRE1a-like isoform X1 [Sesamum indicum]	IPR000719_Protein kinase domain; IPR018997_PUB domain; IPR011009_Protein kinase-like domain superfamily; IPR010513_KEN domain	AT2G17520.1	IRE1A	Endoribonuclease/protein kinase IRE1-like protein	0.01	0.18	0.36	1.63	1.3	1.15	4.04	4.28	5.12	0.61	1.35	0.88	0.73	0.72	0.83	1.14	1.09	0.34	1.47927	0.000500451	0.00373026	3.5082	8.54178e-17	1.14951e-14	2.02893	1.29214e-07	3.16726e-06	0.333541	0.393004	0.66295	-0.0646502	0.86945	0.982255	-0.977573	0.0136563	0.0568233
Rg_000068	uncharacterized protein LOC105179098 [Sesamum indicum]	IPR041577_Reverse transcriptase/retrotransposon-derived protein, RNase H-like domain; IPR012337_Ribonuclease H-like superfamily; IPR002156_Ribonuclease H domain; IPR041588_Integrase zinc-binding domain; IPR001584_Integrase, catalytic core	AT1G65700.1	LSM8	Small nuclear ribonucleoprotein family protein	0.2	0.94	2.5	0.56	0.58	0.57	3.16	3.05	1.31	0.3	0.42	0.42	0.63	0.78	0.57	0.43	0.5	0.05	-2.48528	7.88249e-19	3.60387e-16	-0.144428	0.587562	0.783413	2.34085	1.85378e-17	4.1317e-15	0.289332	0.330208	0.600672	-0.675831	0.0327512	0.149643	0.060416	0.836347	0.946025
Rg_000069	PREDICTED: callose synthase 9 [Erythranthe guttata] XP_012828940.1 PREDICTED: callose synthase 9 [Erythranthe guttata] XP_012828941.1 PREDICTED: callose synthase 9 [Erythranthe guttata]	IPR026899_1,3-beta-glucan synthase subunit FKS1-like, domain-1; IPR003440_Glycosyl transferase, family 48	AT3G07160.2	GSL10	glucan synthase-like 10	0.07	0.19	0.47	0.2	0.27	0.31	5.31	4.77	1.04	0.22	0.64	0.33	0.35	1.03	0.99	0.33	0.65	0.06	-1.48123	0.00623798	0.0281545	2.48508	1.93587e-06	3.30644e-05	3.96631	2.54793e-14	3.1771e-12	1.41603	0.00789255	0.0391747	0.500737	0.358612	0.669764	1.46427	0.00558997	0.0272176
Rg_000070	upf0378 protein kiaa0100 [Phtheirospermum japonicum]	IPR019441_FMP27, GFWDK domain; IPR019443_FMP27, C-terminal	AT1G58250.1	SAB	HYPERSENSITIVE TO PI STARVATION 4	0.43	1.75	4.84	8.26	8.61	8.2	8.11	8.64	6.01	5.39	26.65	9.58	21.96	27.26	23.39	10.97	18.79	1.67	0.436845	0.224476	0.405198	0.539414	0.133916	0.305402	0.10257	0.773609	0.890801	1.52314	1.87333e-05	0.000204778	0.427229	0.231046	0.530025	1.39124	9.21098e-05	0.000795756
Rg_000071	hypothetical protein [Beta vulgaris subsp. vulgaris]	IPR012337_Ribonuclease H-like superfamily; IPR026960_Reverse transcriptase zinc-binding domain; IPR000477_Reverse transcriptase domain; IPR036691_Endonuclease/exonuclease/phosphatase superfamily; IPR002156_Ribonuclease H domain	AT1G51760.1	IAR3	peptidase M20/M25/M40 family protein	0.01	0.14	0.22	0.83	0.93	1.05	0.18	0.43	0.11	1	1.05	1.23	2.93	2.75	2.96	2.02	3.04	0.34	1.45636	2.99585e-05	0.000363233	-0.299698	0.429343	0.649531	-1.75606	6.74399e-08	1.78597e-06	1.11775	0.000100657	0.000922119	1.1164	0.000103804	0.00155505	1.4717	2.03722e-07	3.14234e-06
Rg_000072	uncharacterized protein LOC105172113 [Sesamum indicum]	IPR041677_DNA2/NAM7 helicase, AAA domain; IPR011990_Tetratricopeptide-like helical domain superfamily; IPR027417_P-loop containing nucleoside triphosphate hydrolase; IPR041679_DNA2/NAM7 helicase-like, AAA domain	AT1G65780.1	.	P-loop containing nucleoside triphosphate hydrolases superfamily protein	0.63	2.57	5.79	12.89	11.42	8.73	21.5	22.98	20.47	7.91	17.75	10.99	4.73	4.3	4.27	6.39	12.58	1.76	0.388573	0.0962985	0.222035	1.64246	1.85156e-12	1.18687e-10	1.25388	4.62354e-08	1.27618e-06	1.00642	1.19066e-05	0.000135506	-0.360365	0.119775	0.359104	-1.44806	5.00012e-10	1.19569e-08
Rg_000073	uncharacterized protein LOC105159801 isoform X2 [Sesamum indicum]	0	AT3G19895.1	.	RING/U-box superfamily protein	0.1	0.09	0.32	1.1	1.11	1.46	0.09	0.41	0.43	0.64	0.57	0.41	1.9	1.3	1.27	1.27	1.8	0.27	1.01143	0.0484979	0.134621	-0.661251	0.210549	0.413273	-1.67268	0.000917327	0.00628915	-0.270372	0.584256	0.818299	0.160677	0.743839	0.927936	0.112089	0.818753	0.937815
Rg_000074	uncharacterized protein LOC101212255 isoform X1 [Cucumis sativus]	IPR012337_Ribonuclease H-like superfamily; IPR036875_Zinc finger, CCHC-type superfamily; IPR001584_Integrase, catalytic core; IPR025724_GAG-pre-integrase domain; IPR001878_Zinc finger, CCHC-type; IPR013103_Reverse transcriptase, RNA-dependent DNA polymerase	AT4G38120.3	.	ARM repeat superfamily protein	0	0	0.28	0	0.12	0.13	0.77	0	0	0	0.21	0	0.64	0.39	0.14	0	0.62	0	-0.7326	0.830321	0.923222	0.977271	0.774611	0.91015	1.70987	0.615415	0.780373	0.346494	0.919148	1	0.628674	0.853805	0.97575	1.92691	0.571211	0.785518
Rg_000075	RNA-directed DNA polymerase (reversetranscriptase)-related family protein [Striga asiatica]	IPR002156_Ribonuclease H domain; IPR036691_Endonuclease/exonuclease/phosphatase superfamily; IPR026960_Reverse transcriptase zinc-binding domain; IPR000477_Reverse transcriptase domain	AT2G25180.1	RR12	response regulator 12	0.02	0.07	0.34	17.06	12.77	13.22	1.26	1.58	0.1	1.32	1.45	1.64	2.89	2.4	1.95	4.75	7.51	0.65	5.3069	1.03952e-21	7.24901e-19	1.57186	0.00507017	0.0262923	-3.73504	4.82916e-13	4.52761e-11	-2.38297	3.39674e-06	4.36719e-05	-1.63752	0.00136987	0.0130662	-2.71835	1.1356e-07	1.84608e-06
Rg_000076	protein ARABIDILLO 1 isoform X1 [Sesamum indicum] XP_020553438.1 protein ARABIDILLO 1 isoform X1 [Sesamum indicum] XP_020553439.1 protein ARABIDILLO 1 isoform X2 [Sesamum indicum]	IPR001810_F-box domain; IPR000225_Armadillo; IPR006553_Leucine-rich repeat, cysteine-containing subtype; IPR016024_Armadillo-type fold	AT3G60350.1	ARABIDILLO-2	ARABIDILLO-2	0.13	0.77	1.9	3.27	3.21	3.43	1.47	2.36	1.75	1.7	1.8	1.48	3.81	4.14	3.25	2.24	6.7	0.68	0.451582	0.123304	0.26576	-0.129065	0.663019	0.835742	-0.580647	0.0426424	0.127327	-0.0982743	0.731201	0.907979	0.130849	0.646604	0.876121	0.0236081	0.933726	0.991775
Rg_000077	LOW QUALITY PROTEIN: DEAD-box ATP-dependent RNA helicase 42 [Sesamum indicum]	IPR001650_Helicase, C-terminal; IPR027417_P-loop containing nucleoside triphosphate hydrolase; IPR014001_Helicase superfamily 1/2, ATP-binding domain; IPR011545_DEAD/DEAH box helicase domain	AT1G20920.5	.	P-loop containing nucleoside triphosphate hydrolases superfamily protein	0.73	2.05	4.58	5.75	6.83	6.88	5.1	5.4	4.87	2.96	4.45	4.1	8.55	6.82	6.89	5.62	8.19	1.17	-0.190094	0.292685	0.483585	-0.273729	0.132052	0.30251	-0.0836349	0.637439	0.796941	0.109738	0.537659	0.784068	-0.111633	0.532636	0.80479	0.0327332	0.853211	0.9548
Rg_000078	Sensory transduction histidine kinase [Handroanthus impetiginosus]	IPR003594_Histidine kinase/HSP90-like ATPase; IPR011006_CheY-like superfamily; IPR001789_Signal transduction response regulator, receiver domain; IPR004358_Signal transduction histidine kinase-related protein, C-terminal; IPR036890_Histidine kinase/HSP90-like ATPase superfamily	AT5G35750.1	HK2	histidine kinase 2	0	0.32	0.9	1.67	2.64	1.53	0.65	2.46	1.24	0	0.31	0.21	1.46	0.43	1.03	0.73	0.68	0.19	1.21369	0.210788	0.387769	1.00987	0.298211	0.51817	-0.203821	0.831937	0.925215	-2.7296	0.00521129	0.0279013	-1.33093	0.168105	0.440433	-1.16278	0.226994	0.456483
Rg_000079	.	.	.	.	.	0	0.63	0.97	0	0	0	55.37	8.66	0.01	0	0	0	0	0	0	0	0	0	-9.57047	0.0143356	0.0539207	4.28296	0.250439	0.46344	13.8534	0.000390626	0.00311205	0	1	1	0	1	1	0	1	1
Rg_000080	brefeldin A-inhibited guanine nucleotide-exchange protein 5 isoform X1 [Sesamum indicum] XP_020551181.1 brefeldin A-inhibited guanine nucleotide-exchange protein 5 isoform X1 [Sesamum indicum]	IPR000904_Sec7 domain; IPR032691_Guanine nucleotide exchange factor, N-terminal; IPR015403_Sec7, C-terminal; IPR016024_Armadillo-type fold; IPR032629_Mon2, dimerisation and cyclophilin-binding domain; IPR035999_Sec7 domain superfamily	AT3G43300.3	ATMIN7	HOPM interactor 7	0	0	0	0.12	0.04	0.07	0.03	0.02	0.03	0.04	0.16	0.04	4.39	2.95	7.05	0.69	0.48	0.13	4.13623	0.00190443	0.0110243	2.65059	0.0602173	0.174022	-1.48564	0.0725488	0.186694	0.812142	0.23652	0.492531	2.99389	2.63437e-06	6.40105e-05	5.87624	4.4592e-21	4.07519e-19
Rg_000081	polyprotein [Carnation etched ring virus]	IPR000588_Peptidase A3A, cauliflower mosaic virus-type; IPR041373_Reverse transcriptase, RNase H-like domain; IPR000477_Reverse transcriptase domain	.	.	.	0	0.03	0.07	0.04	0.07	0.06	24.03	0.24	0.01	0.04	0.12	0.04	0.03	0.14	0.08	0.09	0.12	0	-0.593432	NA	NA	6.71596	NA	NA	7.3094	NA	NA	1.03973	NA	NA	0.189628	NA	NA	0.370802	NA	NA
Rg_000082	.	.	.	.	.	0.24	0	0	7.67	17.75	10.54	0	52.25	35.27	7.42	35.43	13.86	29.55	34.81	25.75	20.13	26.82	2.48	3.73983	0.0489708	0.135584	5.26737	0.00555203	0.0282729	1.52754	0.419903	0.618575	1.43693	0.44801	0.711514	0.547131	0.772669	0.941348	1.16082	0.539914	0.762228
Rg_000083	polyprotein [Broad bean wilt virus 2]	IPR000199_Peptidase C3A/C3B, picornaviral; IPR009003_Peptidase S1, PA clan; IPR000605_Helicase, superfamily 3, single-stranded DNA/RNA virus; IPR027417_P-loop containing nucleoside triphosphate hydrolase	AT1G27600.2	IRX9-L	Nucleotide-diphospho-sugar transferases superfamily protein	0	0	0.25	0.32	0.08	0.12	0.68	0.83	0.13	0.35	0.63	0.17	0.81	0.31	0.35	0.69	0.08	0	0.283401	0.82346	0.919609	2.12807	0.0915573	0.234242	1.84467	0.131223	0.283845	2.0265	0.097547	0.27282	0.586925	0.634626	0.869311	1.36258	0.265546	0.505219
Rg_000084	dmx-like protein 1 [Phtheirospermum japonicum]	IPR001680_WD40 repeat; IPR022033_RAVE complex protein Rav1 C-terminal; IPR036322_WD40-repeat-containing domain superfamily	AT2G46560.1	.	transducin family protein / WD-40 repeat family protein	0	0	0	2.44	2.56	2.33	0	0.42	0.84	1.53	1.99	0.91	2.48	2.76	3.85	2.21	3.29	0.7	9.15847	3.80452e-10	2.35352e-08	7.01529	1.73171e-06	2.9984e-05	-2.14317	0.0143833	0.0564399	0.15167	0.861491	0.975305	0.252094	0.771813	0.941025	0.179504	0.83627	0.945996
Rg_000085	histidine kinase 2 isoform X3 [Sesamum indicum]	IPR003594_Histidine kinase/HSP90-like ATPase; IPR036097_Signal transduction histidine kinase, dimerisation/phosphoacceptor domain superfamily; IPR036890_Histidine kinase/HSP90-like ATPase superfamily; IPR001789_Signal transduction response regulator, receiver domain; IPR004358_Signal transduction histidine kinase-related protein, C-terminal; IPR011006_CheY-like superfamily	AT5G35750.1	HK2	histidine kinase 2	0.19	0.44	0.75	6.45	5.6	6.84	3.04	3.05	4.29	1.64	0.58	1.8	4.05	3	2.96	4.27	5.57	0.62	1.98613	2.14121e-06	3.88291e-05	1.43301	0.000648987	0.00495675	-0.553123	0.17414	0.345091	-1.27697	0.00183306	0.0115965	-0.679685	0.0959298	0.310846	-1.07155	0.00859363	0.0388792
Rg_000086	serine/threonine-protein kinase ATR [Sesamum indicum]	IPR016024_Armadillo-type fold; IPR003152_FATC domain; IPR011009_Protein kinase-like domain superfamily; IPR000403_Phosphatidylinositol 3-/4-kinase, catalytic domain; IPR012993_UME domain; IPR003151_PIK-related kinase, FAT	AT5G40820.2	ATR	Ataxia telangiectasia-mutated and RAD3-like protein	0.23	0.93	2.68	3.99	3.96	3.87	2.92	3.22	2.97	0.93	0.51	0.98	1.25	0.96	1.16	1.64	3.16	0.41	0.235601	0.421421	0.614116	0.129031	0.661034	0.834348	-0.10657	0.710615	0.851226	-1.34639	5.22394e-06	6.44375e-05	-0.923543	0.00160287	0.0148623	-1.95848	3.90954e-11	1.10814e-09
Rg_000087	RNA-directed DNA polymerase (reversetranscriptase)-related family protein [Striga asiatica]	IPR036691_Endonuclease/exonuclease/phosphatase superfamily; IPR000477_Reverse transcriptase domain	AT5G40240.3	UMAMIT40	nodulin MtN21 /EamA-like transporter family protein	0.31	0.49	2.5	5.2	3.76	4.48	0.54	0.93	0.42	0.23	0.28	0.22	1.69	1.92	1.69	1.88	4.02	0.13	0.548962	0.153284	0.311264	-2.06156	2.11341e-07	4.63185e-06	-2.61052	2.44142e-11	1.5337e-09	-3.31668	4.09472e-16	2.1451e-14	-1.30279	0.000701626	0.00762228	-1.47405	0.000116004	0.00097609
Rg_000088	serine/threonine-protein kinase TOR [Sesamum indicum] XP_011088034.1 serine/threonine-protein kinase TOR [Sesamum indicum] XP_020551780.1 serine/threonine-protein kinase TOR [Sesamum indicum]	IPR003151_PIK-related kinase, FAT; IPR000403_Phosphatidylinositol 3-/4-kinase, catalytic domain; IPR011009_Protein kinase-like domain superfamily; IPR016024_Armadillo-type fold; IPR036738_FKBP12-rapamycin binding domain superfamily; IPR024585_Domain of unknown function DUF3385, target of rapamycin protein; IPR011990_Tetratricopeptide-like helical domain superfamily; IPR009076_FKBP12-rapamycin bin…	AT1G50030.1	TOR	target of rapamycin	0.18	0.3	0.64	1.39	1.29	1.19	1.24	1.62	0.81	0.6	0.27	0.54	1.29	0.97	0.64	0.86	0.87	0.15	-0.00532046	0.98902	1	0.148095	0.702622	0.86323	0.153416	0.682809	0.831202	-0.509735	0.184238	0.419715	-0.734885	0.0573528	0.221336	-0.587883	0.121555	0.298944
Rg_000089	probable glucan 1 3-alpha-glucosidase [Phtheirospermum japonicum]	IPR036875_Zinc finger, CCHC-type superfamily; IPR000322_Glycoside hydrolase family 31; IPR017853_Glycoside hydrolase superfamily; IPR025887_Glycoside hydrolase family 31, N-terminal domain; IPR025558_Domain of unknown function DUF4283; IPR025836_Zinc knuckle CX2CX4HX4C; IPR011013_Galactose mutarotase-like domain superfamily	AT5G63840.2	RSW3	Glycosyl hydrolases family 31 protein	0.55	2.57	5.82	11.61	10.45	10.21	9.29	11.49	5.26	4.31	5.11	5.47	13.98	13.07	12.22	8.35	16.23	1.41	0.393608	0.0270753	0.0873335	0.299046	0.094406	0.23928	-0.0945625	0.586441	0.757494	-0.220697	0.206979	0.451725	-0.204714	0.242059	0.543965	0.138709	0.423499	0.668348
Rg_000090	uncharacterized protein LOC105177625 isoform X1 [Sesamum indicum]	.	AT3G50370.2	.	hypothetical protein	0.31	1.74	3.38	7.63	7.56	8.89	4.66	6.63	6.46	1.61	2.91	2.6	3.56	4.32	5.08	2.04	8	0.72	0.705961	0.042448	0.121905	0.542389	0.11962	0.282688	-0.163572	0.634264	0.794667	-0.900623	0.00921789	0.0444717	-1.03752	0.00274825	0.0230617	-1.0326	0.00276301	0.0151659
Rg_000091	piezo-type mechanosensitive ion channel homolog isoform X1 [Sesamum indicum]	IPR031334_Piezo non-specific cation channel, R-Ras-binding domain	AT2G48060.2	.	piezo-type mechanosensitive ion channel component	0.72	2.95	5.85	7.2	8.69	7.51	9.54	11.01	5.47	3.98	5.57	4.64	7.02	6.05	6.71	6.77	10.83	1.01	-0.234058	0.140588	0.292414	0.131446	0.408243	0.630159	0.365504	0.0183296	0.0677057	0.151825	0.331623	0.602187	-0.21332	0.176104	0.452369	-0.393411	0.0119326	0.0508098
Rg_000092	RNA-directed DNA polymerase (reversetranscriptase)-related family protein [Striga asiatica]	IPR036691_Endonuclease/exonuclease/phosphatase superfamily; IPR000477_Reverse transcriptase domain	AT5G40240.3	UMAMIT40	nodulin MtN21 /EamA-like transporter family protein	1.86	5.13	13.19	17.16	16.58	18.69	3.07	5.27	1.77	1.65	2.03	0.61	12.21	10.12	10.46	7.41	12.57	0.93	-0.175509	0.607021	0.769683	-2.3679	5.81498e-12	3.40789e-10	-2.19239	1.63894e-10	8.56785e-09	-2.73331	2.7724e-15	1.32128e-13	-1.28683	0.000169335	0.00235684	-0.830816	0.014807	0.0606031
Rg_000093	uncharacterized protein LOC105169752 [Sesamum indicum]	IPR004140_Exocyst complex component Exo70; IPR016159_Cullin repeat-like-containing domain superfamily	AT4G38760.1	.	nucleoporin (DUF3414)	0.7	3.42	6.67	15.59	21.1	14.29	24.17	20.92	19.57	5.5	8.37	4.34	7.73	7.19	7.2	7.84	11.73	1.45	0.751926	0.000897342	0.00601513	1.35969	1.88355e-09	6.64696e-08	0.607762	0.00637457	0.0299496	-0.618956	0.0057956	0.0304385	-1.05598	2.76687e-06	6.67652e-05	-1.35445	1.66493e-09	3.68194e-08
Rg_000094	uncharacterized protein LOC112093781 [Morus notabilis]	IPR001878_Zinc finger, CCHC-type; IPR036875_Zinc finger, CCHC-type superfamily	AT3G23490.1	CYN	cyanase	0.15	0.44	1.07	1.32	1.33	1.5	0.93	1.73	1.17	0.6	0.9	0.66	1.78	1.82	1.66	2.15	2.45	0.17	-0.222666	0.400211	0.594116	-0.10118	0.704344	0.864395	0.121486	0.63276	0.793398	-0.0677699	0.794249	0.94065	0.236352	0.357168	0.668483	0.188646	0.455903	0.69669
Rg_000095	hypothetical protein CKAN_02080200 [Cinnamomum micranthum f. kanehirae]	IPR013103_Reverse transcriptase, RNA-dependent DNA polymerase; IPR025724_GAG-pre-integrase domain; IPR001584_Integrase, catalytic core; IPR012337_Ribonuclease H-like superfamily; IPR036875_Zinc finger, CCHC-type superfamily; IPR001878_Zinc finger, CCHC-type	AT4G23160.3	CRK8	cysteine-rich RECEPTOR-like kinase	0.09	0.28	0.89	0	0	0	1.52	0.96	0	0.15	0	0	0	0	0	0	0	0	-9.37848	0.0170589	0.0615242	-0.305413	0.935128	1	9.07306	0.0209793	0.0750152	5.92619	0.132878	0.338202	0	1	1	0	1	1
Rg_000096	Sensory transduction histidine kinase [Handroanthus impetiginosus]	IPR006189_CHASE domain; IPR001789_Signal transduction response regulator, receiver domain; IPR004358_Signal transduction histidine kinase-related protein, C-terminal; IPR011006_CheY-like superfamily; IPR003661_Signal transduction histidine kinase, dimerisation/phosphoacceptor domain; IPR003594_Histidine kinase/HSP90-like ATPase; IPR036097_Signal transduction histidine kinase, dimerisation/phospho…	AT5G35750.1	HK2	histidine kinase 2	0.44	2.09	4.07	17.23	18.54	18.84	5.12	8.87	6.15	2.89	2.74	3.45	9.1	7.82	7.86	8.62	14.36	2.38	1.5564	4.14799e-10	2.52304e-08	0.360968	0.149664	0.328637	-1.19544	1.05019e-06	1.9767e-05	-1.68815	7.80242e-12	2.48602e-10	-0.743288	0.00240483	0.0206876	-1.29424	1.24983e-07	2.01398e-06
Rg_000097	translational activator gcn1 [Phtheirospermum japonicum]	IPR016024_Armadillo-type fold; IPR034085_TOG domain	AT1G64790.3	ILA	ILITYHIA	2.8	8.01	20.44	1.53	0.34	1.42	2.22	4.08	0	0.53	0	0.91	1.96	1.11	0.89	1.26	3.65	0.24	-4.81138	0.000444416	0.00338719	-3.77366	0.00584836	0.0294904	1.03771	0.449132	0.644691	-0.209672	0.878719	0.983733	0.672872	0.623881	0.862457	0.114422	0.933541	0.991647
Rg_000098	DNAJ heat shock N-terminal domain-containing protein [Striga asiatica]	IPR016024_Armadillo-type fold; IPR036869_Chaperone J-domain superfamily; IPR001623_DnaJ domain; IPR025640_GYF domain 2	AT2G26890.1	GRV2	DNAJ heat shock N-terminal domain-containing protein	0.93	4.73	9.75	18.5	16.72	17.64	10.16	11.61	9.53	6.34	9.23	8.26	18.49	18.61	16.66	13.17	27.4	2.48	0.318813	0.0531087	0.143813	-0.176882	0.286124	0.505092	-0.495695	0.00231276	0.0133081	-0.271023	0.0962871	0.270279	-0.176819	0.277781	0.586166	-0.121201	0.454603	0.695704
Rg_000099	uncharacterized protein LOC113735973 [Coffea arabica]	IPR026960_Reverse transcriptase zinc-binding domain; IPR000477_Reverse transcriptase domain; IPR002156_Ribonuclease H domain; IPR012337_Ribonuclease H-like superfamily	AT5G35730.1	.	EXS (ERD1/XPR1/SYG1) family protein	0.65	1.48	3.86	3.26	3.27	3.14	3.37	4.1	1.39	1.52	2.3	1.4	4.06	3.4	3.1	3.21	5.35	0.58	-0.921613	0.000160369	0.00146719	-0.854394	0.000496043	0.00395215	0.0672196	0.781887	0.895795	-0.0204254	0.933527	1	0.0947312	0.698452	0.905309	-0.027256	0.910595	0.980651
Rg_000100	hypothetical protein F511_00295 [Dorcoceras hygrometricum]	IPR036875_Zinc finger, CCHC-type superfamily; IPR001878_Zinc finger, CCHC-type; IPR012337_Ribonuclease H-like superfamily; IPR013103_Reverse transcriptase, RNA-dependent DNA polymerase; IPR001584_Integrase, catalytic core; IPR025724_GAG-pre-integrase domain	AT4G23160.3	CRK8	cysteine-rich RECEPTOR-like kinase	0.47	1.11	3.24	5.85	5.64	3.46	3.68	4.4	2.93	1.46	1.99	0.92	3.9	2.78	1.51	4.06	4.84	0.5	0.0664945	0.832191	0.923948	-0.120253	0.70257	0.863216	-0.186748	0.547194	0.726061	-0.881673	0.00496555	0.0268287	-0.514126	0.0999826	0.319488	-1.0277	0.00100012	0.00638221
Rg_000101	hypothetical protein CDL12_23271 [Handroanthus impetiginosus]	0	AT4G31570.6	.	nucleoporin	0.38	2.72	5.17	10.26	12.21	9.93	8.33	9.16	5.6	4.17	5.31	5.49	13.76	11.82	10.8	12.01	20.08	1.6	0.554224	0.0112432	0.0446295	0.295594	0.178005	0.369514	-0.25863	0.228222	0.414252	-0.231772	0.281682	0.547736	0.12161	0.571262	0.829963	0.0116277	0.956691	1
Rg_000102	cellulose synthase A catalytic subunit 4 [UDP-forming] [Sesamum indicum]	IPR003591_Leucine-rich repeat, typical subtype; IPR011009_Protein kinase-like domain superfamily; IPR001611_Leucine-rich repeat; IPR013210_Leucine-rich repeat-containing N-terminal, plant-type; IPR000719_Protein kinase domain	AT5G44030.3	CESA4	cellulose synthase A4	0	0.02	0.13	0.08	0	0.15	0	0.27	0.38	0.03	0.1	0	0	0.23	0.1	3.3	3.03	0.11	-0.203937	0.899033	0.962285	1.56243	0.326371	0.548643	1.76637	0.254604	0.445445	-0.0524524	0.973648	1	4.64247	0.0026075	0.0221099	0.311245	0.842486	0.949119
Rg_000103	uncharacterized protein LOC105158654 isoform X1 [Sesamum indicum] XP_011073781.1 uncharacterized protein LOC105158654 isoform X1 [Sesamum indicum]	IPR036890_Histidine kinase/HSP90-like ATPase superfamily	AT4G13750.1	NOV	Histidine kinase-, DNA gyrase B-, and HSP90-like ATPase family protein	0.37	1.71	3.57	4.5	5.27	4.07	4.25	5	3.08	2.32	3.07	2.37	6.02	5.7	5.69	2.98	5.38	0.62	-0.206192	0.18369	0.353035	-0.138204	0.376679	0.600572	0.0679881	0.649457	0.806265	0.0463245	0.760014	0.923747	-0.426401	0.00577493	0.0410891	0.184968	0.213625	0.438523
Rg_000104	hypothetical protein F511_00295 [Dorcoceras hygrometricum]	IPR012337_Ribonuclease H-like superfamily; IPR001878_Zinc finger, CCHC-type; IPR025724_GAG-pre-integrase domain; IPR013103_Reverse transcriptase, RNA-dependent DNA polymerase; IPR036875_Zinc finger, CCHC-type superfamily; IPR001584_Integrase, catalytic core	AT4G23160.3	CRK8	cysteine-rich RECEPTOR-like kinase	0.12	0.13	0.09	0.99	0.64	0.65	0.59	1.05	0.39	0.27	0.07	0.37	0.16	0.27	0.32	1.25	1.27	0.23	0.319388	0.633836	0.790301	0.368075	0.584134	0.780897	0.0486863	0.94069	0.986752	-0.704935	0.288962	0.555864	0.638131	0.328957	0.64155	-1.67734	0.012533	0.0529206
Rg_000105	hypothetical protein PHJA_002287100 [Phtheirospermum japonicum]	IPR031801_Virilizer, N-terminal	AT3G05680.2	EMB2016	embryo defective 2016	0.05	0.55	0.63	0.83	0.53	0.44	1.43	1.55	0.3	0.34	0.45	0.21	0.3	0.41	0.41	0.96	0.47	0.25	-0.954531	0.112474	0.248706	0.0896041	0.880933	0.976729	1.04413	0.0781311	0.196827	0.0347463	0.954024	1	0.638986	0.285008	0.59466	-0.807328	0.183315	0.396282
Rg_000106	translational activator gcn1 [Phtheirospermum japonicum]	IPR016024_Armadillo-type fold; IPR034085_TOG domain	AT1G64790.3	ILA	ILITYHIA	0.91	7.24	11.97	26.79	26.54	25.05	31.39	31.83	19.49	7.23	8.61	8.8	17.69	15.58	14.08	12.31	23.56	2.78	0.53316	0.0262539	0.0853028	0.842282	0.000447615	0.00362436	0.309122	0.194112	0.371653	-0.778153	0.00113515	0.00773625	-0.797679	0.000853859	0.00892495	-0.878182	0.000234	0.00181248
Rg_000107	ABC transporter C family member 12-like isoform X3 [Sesamum indicum]	IPR006867_Domain of unknown function DUF632; IPR006868_Domain of unknown function DUF630	AT2G34660.3	ABCC2	multidrug resistance-associated protein 2	0.12	0	0.23	0.28	0.27	0.08	0.2	0.2	0	0.4	0.33	0.18	0.1	0.11	0.1	0	0	0.07	-1.50363	0.339138	0.532945	-2.00161	0.20583	0.406974	-0.497977	0.752767	0.87871	1.45072	0.354933	0.626929	-0.51836	0.744179	0.928058	-1.16061	0.465352	0.704512
Rg_000108	uncharacterized protein LOC105177625 isoform X1 [Sesamum indicum]	.	AT3G50370.2	.	hypothetical protein	1.92	7.81	17.2	26.31	28.07	23.13	28.41	30.01	19.86	7.28	9.07	9.24	24.85	19.04	18.1	17.14	26.52	3.09	0.030967	0.805303	0.909288	0.285352	0.0232716	0.0861779	0.254385	0.039522	0.120324	-0.709566	1.51869e-08	3.02851e-07	-0.527547	2.48632e-05	0.000454221	-0.476231	0.000125618	0.00104793
Rg_000109	serine/threonine-protein kinase TOR [Sesamum indicum] XP_011088034.1 serine/threonine-protein kinase TOR [Sesamum indicum] XP_020551780.1 serine/threonine-protein kinase TOR [Sesamum indicum]	IPR003152_FATC domain; IPR016024_Armadillo-type fold; IPR024585_Domain of unknown function DUF3385, target of rapamycin protein; IPR011990_Tetratricopeptide-like helical domain superfamily; IPR011009_Protein kinase-like domain superfamily; IPR000403_Phosphatidylinositol 3-/4-kinase, catalytic domain; IPR009076_FKBP12-rapamycin binding domain; IPR003151_PIK-related kinase, FAT; IPR036738_FKBP12-ra…	AT1G50030.1	TOR	target of rapamycin	0.72	5.69	15.31	30.88	25.35	31.68	11.58	11.86	15.74	8.99	8.5	8.85	17.52	16.7	17.42	6.68	30.42	2.92	0.77092	0.0624789	0.162168	-0.0859013	0.835714	0.948329	-0.856821	0.0380255	0.116908	-0.832745	0.0438689	0.151846	-0.967913	0.0191996	0.102372	-0.912784	0.0270893	0.0976182
Rg_000110	sacsin [Phtheirospermum japonicum]	.	AT5G23110.1	.	Zinc finger, C3HC4 type (RING finger) family protein	0.64	0.98	1.97	2.09	2.87	0.88	2.41	2.8	1.76	0.4	1.54	1.17	2.1	1.87	1.98	3.73	2.55	0.35	-1.23909	0.00902998	0.0376701	-0.736255	0.120675	0.284598	0.502833	0.287928	0.483432	-0.0734695	0.877452	0.983151	0.385898	0.416448	0.719955	-0.110342	0.816147	0.936506
Rg_000111	dmx-like protein 1 [Phtheirospermum japonicum]	IPR022033_RAVE complex protein Rav1 C-terminal; IPR001680_WD40 repeat; IPR011047_Quinoprotein alcohol dehydrogenase-like superfamily; IPR036322_WD40-repeat-containing domain superfamily	AT2G46560.1	.	transducin family protein / WD-40 repeat family protein	0.49	3.18	4.81	9.61	10.27	9.99	4.71	6.32	4.4	3.5	3.27	4.78	10.31	9.72	8.01	6.51	11.98	1	0.306508	0.200869	0.375393	-0.404911	0.0933568	0.237579	-0.711419	0.00272224	0.015182	-0.467975	0.0489696	0.165174	-0.53117	0.0256355	0.125796	-0.246899	0.296106	0.539606
Rg_000112	RNA-directed DNA polymerase (reversetranscriptase)-related family protein [Striga asiatica]	IPR036691_Endonuclease/exonuclease/phosphatase superfamily; IPR000477_Reverse transcriptase domain	AT5G40240.3	UMAMIT40	nodulin MtN21 /EamA-like transporter family protein	0	0	0	0.83	1.14	0.99	0	0	0	0.14	0	0.08	0.24	0	0.93	0.17	0.15	0.08	7.75129	3.58454e-05	0.00042157	0	1	1	-8.74826	3.09742e-06	5.09677e-05	-2.79937	0.0598961	0.191981	-1.91337	0.194782	0.480841	-1.45136	0.322627	0.56884
Rg_000113	hypothetical protein PHJA_002456000 [Phtheirospermum japonicum]	IPR024975_Domain of unknown function DUF3883; IPR036890_Histidine kinase/HSP90-like ATPase superfamily	AT4G13750.1	NOV	Histidine kinase-, DNA gyrase B-, and HSP90-like ATPase family protein	0.32	1.18	2.47	2.37	2.85	2.53	3.56	4.05	2.02	0.77	0.57	0.82	1.84	1.6	1.53	1.55	1.74	0.35	-0.568906	0.0254473	0.083291	-0.0425788	0.867005	0.967965	0.526327	0.0345307	0.108797	-0.928329	0.000382884	0.00300344	-0.713394	0.00587534	0.0416175	-0.797889	0.00177594	0.0104234
Rg_000114	hypothetical protein CKAN_02080200 [Cinnamomum micranthum f. kanehirae]	IPR013103_Reverse transcriptase, RNA-dependent DNA polymerase; IPR025724_GAG-pre-integrase domain; IPR001584_Integrase, catalytic core; IPR012337_Ribonuclease H-like superfamily; IPR036875_Zinc finger, CCHC-type superfamily; IPR001878_Zinc finger, CCHC-type	AT4G23160.3	CRK8	cysteine-rich RECEPTOR-like kinase	0.26	0.72	1.02	0.3	0.52	0.3	1.09	0.48	0.08	0.03	0.77	0.36	0.78	0.58	0.29	0.65	0.54	0.03	-2.65763	0.00111259	0.00716197	-1.91513	0.0184872	0.0723732	0.742502	0.364293	0.564726	0.808191	0.324755	0.594985	0.13132	0.873988	0.983763	0.383769	0.639807	0.833919
Rg_000115	uncharacterized protein LOC105159801 isoform X2 [Sesamum indicum]	0	AT3G19895.1	.	RING/U-box superfamily protein	0.12	1.04	1.49	0.58	0.31	0.19	0.81	0.56	0.19	0	0.51	0.64	0.49	0.47	0.36	0.31	0.81	0	-2.80347	0.00545955	0.0253641	-2.03852	0.0429287	0.135886	0.764953	0.449795	0.645282	0.95589	0.345515	0.616939	-0.232528	0.820578	0.961989	0.194164	0.848292	0.952356
Rg_000116	polyprotein [Broad bean wilt virus 2]	IPR027417_P-loop containing nucleoside triphosphate hydrolase; IPR009003_Peptidase S1, PA clan; IPR000605_Helicase, superfamily 3, single-stranded DNA/RNA virus; IPR001205_RNA-directed RNA polymerase, C-terminal domain; IPR000199_Peptidase C3A/C3B, picornaviral	AT4G12610.1	RAP74	transcription initiation factor IIF subunit alpha RAP74	16.35	26.74	655.33	1912.79	3473.66	2335.55	2671.27	1654.97	12683.6	906.86	8033.44	1597.39	2730.89	4715.4	1231.21	1188.08	4753.93	156.61	2.59534	0.00492455	0.0234318	4.18886	5.66738e-06	8.57273e-05	1.59352	0.0842488	0.207815	1.19239	0.19638	0.437365	-0.553846	0.548453	0.815375	0.000906682	0.999216	1
Rg_000117	uncharacterized protein LOC105157560 [Sesamum indicum]	IPR021319_Protein of unknown function DUF2921	AT1G52780.1	.	PII, uridylyltransferase (DUF2921)	0.22	1.01	1.87	4.17	5.04	3.98	1.71	2.97	2.15	2.1	2.75	2.76	3.73	3.41	3.58	4.73	9.85	0.74	0.561518	0.012967	0.0498527	-0.138833	0.545977	0.751433	-0.700351	0.00137027	0.00872516	0.090775	0.675735	0.876312	0.269808	0.212691	0.505978	-0.445723	0.0400791	0.131742
Rg_000118	polyprotein [Broad bean wilt virus 2]	IPR009003_Peptidase S1, PA clan; IPR000605_Helicase, superfamily 3, single-stranded DNA/RNA virus; IPR001205_RNA-directed RNA polymerase, C-terminal domain; IPR000199_Peptidase C3A/C3B, picornaviral	AT5G16780.2	DOT2	SART-1 family	0.77	0.12	0.45	0.36	0.06	0.04	0.33	0.46	0.49	0.25	0.16	0.06	0.58	0.11	0.09	0.47	0.17	0.06	-4.47447	1.40677e-05	0.000191519	-2.67801	0.00844093	0.0392653	1.79646	0.0828176	0.2051	1.03205	0.323866	0.594278	1.07051	0.306296	0.617966	0.571868	0.584383	0.795048
Rg_000119	cellulose synthase A catalytic subunit 4 [Paulownia fortunei]	IPR003591_Leucine-rich repeat, typical subtype; IPR011009_Protein kinase-like domain superfamily; IPR001611_Leucine-rich repeat; IPR013210_Leucine-rich repeat-containing N-terminal, plant-type; IPR000719_Protein kinase domain	AT5G44030.2	CESA4	cellulose synthase A4	0.06	0.04	0.09	0.78	3.35	2.36	0	1.46	0.7	0.08	0.49	0.87	1.28	1.79	0.86	31.44	42.53	0.98	2.97562	0.00600536	0.0273442	1.56709	0.149283	0.32805	-1.40853	0.181272	0.354979	-1.35968	0.197482	0.438847	3.30183	0.00164039	0.0151425	-0.908224	0.387864	0.635734
Rg_000120	glutamate synthase 1 [NADH], chloroplastic isoform X2 [Sesamum indicum]	IPR002489_Glutamate synthase, alpha subunit, C-terminal; IPR006005_Glutamate synthase, NADH/NADPH, small subunit 1; IPR017932_Glutamine amidotransferase type 2 domain; IPR029055_Nucleophile aminohydrolases, N-terminal; IPR006982_Glutamate synthase, central-N; IPR023753_FAD/NAD(P)-binding domain; IPR036188_FAD/NAD(P)-binding domain superfamily; IPR002932_Glutamate synthase domain; IPR028261_Dihydr…	AT5G53460.1	GLT1	NADH-dependent glutamate synthase 1	0.09	2	6.56	4.02	4.67	5.12	18.87	14.62	9.56	0.67	0.64	1.23	10.15	8.21	4.21	4.1	6.46	0.45	-0.384067	0.479312	0.666296	1.47859	0.00637818	0.0315694	1.86265	0.00056325	0.00421232	-1.55362	0.00448187	0.0246629	-0.31734	0.55878	0.821934	0.529548	0.327456	0.573941
Rg_000121	PREDICTED: uncharacterized protein LOC105975715 isoform X1 [Erythranthe guttata]	IPR027417_P-loop containing nucleoside triphosphate hydrolase; IPR041677_DNA2/NAM7 helicase, AAA domain; IPR041679_DNA2/NAM7 helicase-like, AAA domain	AT1G16800.2	.	P-loop containing nucleoside triphosphate hydrolases superfamily protein	0.18	0.5	0.89	0	0.59	0	0.8	1.29	1.78	0	0.45	0	0.99	1.37	0.61	1.35	0	0.27	-3.14425	0.142883	0.295806	-0.113471	0.9577	1	3.03078	0.157566	0.322116	0.293388	0.891695	0.989721	2.35074	0.273365	0.581422	2.16059	0.313891	0.559108
Rg_000122	wall-associated kinase 2 [Prunus dulcis]	IPR001584_Integrase, catalytic core; IPR012337_Ribonuclease H-like superfamily; IPR013103_Reverse transcriptase, RNA-dependent DNA polymerase; IPR005162_Retrotransposon gag domain; IPR029472_Retrotransposon Copia-like, N-terminal	AT4G23160.3	CRK8	cysteine-rich RECEPTOR-like kinase	0.17	0.94	1.57	2.21	1.82	2.09	1.27	1.56	1.12	0.97	1.58	1.12	3.63	3.64	2.88	2.15	3.3	0.35	-0.352321	0.0561755	0.149818	-0.737794	0.000111646	0.00111335	-0.385473	0.0330604	0.105245	0.134643	0.454111	0.716741	0.0873781	0.626836	0.863906	0.577536	0.000808448	0.00531507
Rg_000123	protein high chlorophyll fluorescent 107 [Sesamum indicum]	IPR019734_Tetratricopeptide repeat; IPR011990_Tetratricopeptide-like helical domain superfamily; IPR003107_HAT (Half-A-TPR) repeat	AT3G17040.2	HCF107	high chlorophyll fluorescent 107	0.12	0.75	1.71	0.83	0.73	0.97	0.8	1.01	0.27	0.66	0.68	0.63	0.59	1.1	0.47	0.87	1.51	0.33	-1.40383	0.00120822	0.00765082	-1.51511	0.000539121	0.00423139	-0.111282	0.79868	0.905834	0.520784	0.23053	0.484313	0.59256	0.172286	0.446802	-0.403751	0.356767	0.605147
Rg_000124	translocase of chloroplast 159, chloroplastic, partial [Sesamum indicum]	IPR025558_Domain of unknown function DUF4283; IPR025836_Zinc knuckle CX2CX4HX4C	AT4G02510.1	TOC159	translocon at the outer envelope membrane of chloroplasts 159	0.1	0.07	0.49	1.91	1.86	2.47	0.68	0.92	0.2	0.64	1.12	0.82	1.57	1.64	1.58	1.77	2.18	0.35	1.64867	0.000203383	0.00178502	0.0249552	0.956279	1	-1.62371	0.000136468	0.00129711	-0.418392	0.317864	0.588442	-0.221141	0.596787	0.846115	-0.533424	0.200438	0.420357
Rg_000125	PREDICTED: uncharacterized protein LOC105968491 [Erythranthe guttata]	IPR021109_Aspartic peptidase domain superfamily; IPR000477_Reverse transcriptase domain; IPR041577_Reverse transcriptase/retrotransposon-derived protein, RNase H-like domain	AT4G23160.3	CRK8	cysteine-rich RECEPTOR-like kinase	0.11	0.32	0.66	2.38	2.48	1.98	0.81	1.57	1.18	0.76	1.28	1.28	1.98	2.6	2.2	2.32	3.11	0.38	1.05165	6.62851e-05	0.000700142	0.370032	0.170606	0.359265	-0.681613	0.00509153	0.025081	-0.170159	0.482809	0.740189	-0.0208257	0.931219	1	-0.149387	0.531232	0.755533
Rg_000126	PREDICTED: uncharacterized protein LOC105975715 isoform X1 [Erythranthe guttata]	IPR027417_P-loop containing nucleoside triphosphate hydrolase; IPR041677_DNA2/NAM7 helicase, AAA domain; IPR041679_DNA2/NAM7 helicase-like, AAA domain	AT1G16800.2	.	P-loop containing nucleoside triphosphate hydrolases superfamily protein	0	0.34	0.51	3.68	4.1	3.02	0	0	0.28	0.58	0.54	1.55	2.17	0.47	2.84	0.36	4.02	0.59	2.43908	0.0579244	0.15328	-2.28697	0.0812568	0.215416	-4.72605	0.000277142	0.00234203	-1.10765	0.385453	0.655924	-0.686938	0.590237	0.84156	-1.11085	0.383763	0.631507
Rg_000127	WRKY56 [Catalpa bungei]	IPR036322_WD40-repeat-containing domain superfamily; IPR001680_WD40 repeat	AT4G11270.1	.	Transducin/WD40 repeat-like superfamily protein	0.1	0.4	0.42	0.52	0.62	0.75	0.56	1.11	0.63	0.2	0.19	0.25	0.47	1.01	0.42	0.9	1.05	0.17	-0.694323	0.0990822	0.226792	-0.195289	0.642194	0.822133	0.499035	0.223326	0.408203	-0.673753	0.120486	0.315969	0.447648	0.280284	0.589131	-0.149628	0.718726	0.883324
Rg_000128	1-phosphatidylinositol-3-phosphate 5-kinase FAB1B [Sesamum indicum]	IPR002498_Phosphatidylinositol-4-phosphate 5-kinase, core; IPR002423_Chaperonin Cpn60/TCP-1 family; IPR011011_Zinc finger, FYVE/PHD-type; IPR000306_FYVE zinc finger; IPR027409_GroEL-like apical domain superfamily	AT3G14270.2	FAB1B	phosphatidylinositol-4-phosphate 5-kinase family protein	0.81	2.72	6.23	9.13	10.15	8.51	6.91	7.71	6.05	3.68	6.16	4.42	11.84	12.15	11.22	8.82	16.24	1.41	-0.0276138	0.84317	0.930034	-0.202229	0.151314	0.330994	-0.174615	0.198826	0.377722	-0.0961577	0.482571	0.740014	0.0344108	0.801097	0.95344	0.195274	0.147224	0.341526
Rg_000129	cellulose synthase A catalytic subunit 4 [Paulownia fortunei]	IPR003591_Leucine-rich repeat, typical subtype; IPR011009_Protein kinase-like domain superfamily; IPR001611_Leucine-rich repeat; IPR013210_Leucine-rich repeat-containing N-terminal, plant-type; IPR000719_Protein kinase domain	AT5G44030.1	CESA4	cellulose synthase A4	0.29	1.42	3.24	4.22	7.04	5.94	13.98	13.8	5.71	2.11	2.32	2.9	4.3	3.07	2.03	74.23	116.19	2.95	0.393703	0.386892	0.58099	1.53889	0.000709446	0.00532833	1.14518	0.0109947	0.0457409	-0.349199	0.440311	0.704971	3.28338	2.8856e-13	2.84842e-11	-1.0559	0.0197464	0.0761045
Rg_000130	MND1-interacting protein 1 isoform X1 [Sesamum indicum] XP_011085015.1 MND1-interacting protein 1 isoform X1 [Sesamum indicum] XP_020551602.1 MND1-interacting protein 1 isoform X1 [Sesamum indicum]	IPR001841_Zinc finger, RING-type	AT1G32530.1	.	RING/U-box superfamily protein	0.32	1.19	2.43	5.65	5.13	5.47	2.95	3.57	1.73	2.26	2.58	2.64	4.8	4.29	3.7	5.26	8.03	0.92	0.491978	0.00100625	0.00660031	-0.258783	0.0944881	0.239441	-0.750761	1.43487e-07	3.4793e-06	-0.226623	0.110538	0.297751	-0.00225148	0.987223	1	-0.500713	0.000368235	0.00268522
Rg_000131	protein ROS1-like [Sesamum indicum]	IPR028925_Demeter, RRM-fold domain; IPR003265_HhH-GPD domain; IPR011257_DNA glycosylase; IPR028924_Permuted single zf-CXXC unit; IPR003651_Endonuclease III-like, iron-sulphur cluster loop motif	AT2G36490.1	DML1	demeter-like 1	0.55	1.9	7.61	15.6	15.63	14.49	8.82	10.67	12.04	7.72	8.78	9.86	17.43	15.09	12.22	17.98	36.07	2.31	0.881832	0.00214516	0.0121161	0.641719	0.0257501	0.0930702	-0.240112	0.397796	0.598008	0.0993571	0.726467	0.905166	0.300844	0.289315	0.599283	-0.185247	0.51396	0.742867
Rg_000132	histone-lysine N-methyltransferase ATXR3-like isoform X2 [Sesamum indicum]	IPR001214_SET domain; IPR036047_F-box-like domain superfamily	AT4G15180.1	SDG2	SET domain protein 2	0	0	0	0.36	0	0.16	0	0	0	0	0	0	0	0	0	0.32	0	0	5.13979	0.317168	0.509181	0	1	1	-6.13681	0.232372	0.419066	-5.68998	0.268157	0.531517	-0.683113	0.891635	0.989737	-6.20996	0.226852	0.456279
Rg_000133	Histone acetyltransferase [Handroanthus impetiginosus]	IPR001487_Bromodomain; IPR036427_Bromodomain-like superfamily; IPR028941_WHIM2 domain; IPR011011_Zinc finger, FYVE/PHD-type; IPR019787_Zinc finger, PHD-finger; IPR028942_WHIM1 domain; IPR001965_Zinc finger, PHD-type	AT3G01460.1	MBD9	methyl-CPG-binding domain 9	0.04	0.13	0.25	0.57	0.47	0.3	1.66	1.45	0.36	0.27	0.22	0.38	1.06	0.84	0.85	0.28	0.72	0.05	0.0847272	0.857391	0.938108	1.66256	0.000321737	0.00275512	1.57783	0.000232866	0.00201931	0.296302	0.507103	0.760348	-0.279251	0.541855	0.810997	0.917103	0.0339825	0.115986
Rg_000134	mediator of RNA polymerase ii transcription subunit 12 [Phtheirospermum japonicum]	IPR019035_Mediator complex, subunit Med12	AT4G00450.2	CCT	RNA polymerase II transcription mediator	0.64	2.49	5.9	9.65	11.08	9.82	6.79	7.09	4.86	3.63	4.77	4.2	9.05	8.6	9.01	6.64	12.74	1.34	0.277501	0.0474052	0.132435	-0.189189	0.182817	0.376249	-0.46669	0.000591326	0.0043831	-0.398663	0.00362994	0.0206416	-0.392584	0.00418926	0.0320335	-0.343062	0.0111398	0.0480272
Rg_000135	PREDICTED: callose synthase 9 [Erythranthe guttata] XP_012828940.1 PREDICTED: callose synthase 9 [Erythranthe guttata] XP_012828941.1 PREDICTED: callose synthase 9 [Erythranthe guttata]	IPR003440_Glycosyl transferase, family 48; IPR026899_1,3-beta-glucan synthase subunit FKS1-like, domain-1	AT3G07160.2	GSL10	glucan synthase-like 10	0.03	0.49	1.06	0.22	0.37	0.32	4.59	4.44	0.65	0	0.1	0.05	0.4	0.09	0.24	0.17	0.32	0	-1.98923	0.0189278	0.0664762	1.545	0.0645033	0.182415	3.53423	2.49848e-05	0.000307883	-1.89271	0.0399774	0.141369	-1.17445	0.186459	0.468473	-0.528802	0.539004	0.761544
Rg_000136	vacuolar protein sorting-associated protein 13c [Phtheirospermum japonicum]	IPR031642_VPS13, repeated coiled region; IPR031646_Vacuolar protein sorting-associated protein 13, second N-terminal domain; IPR001849_Pleckstrin homology domain	AT4G17140.3	.	pleckstrin homology (PH) domain-containing protein	0	0.03	0.03	0.07	0.15	0	0.09	0.07	0.03	0	0	0	0.11	0.08	0	0.09	0	0	0.313024	0.867387	0.943348	0.327552	0.861919	0.964867	0.0145285	0.993606	1	-4.44678	0.0369793	0.133256	-1.31043	0.488685	0.774106	-0.537444	0.768456	0.911077
Rg_000137	WRKY56 [Catalpa bungei]	IPR036322_WD40-repeat-containing domain superfamily; IPR001680_WD40 repeat	AT4G11270.1	.	Transducin/WD40 repeat-like superfamily protein	0.8	1.78	5.01	9.57	8.05	8.26	7.38	8.49	5.17	2.37	3.12	2.77	7.5	6.14	5.6	5.48	7.84	0.84	0.190032	0.176811	0.343728	0.130335	0.358147	0.582357	-0.0596973	0.658714	0.813471	-0.759442	5.68651e-08	1.03072e-06	-0.701488	4.91543e-07	1.45758e-05	-0.57821	2.28543e-05	0.000231251
Rg_000138	protein ARABIDILLO 1 isoform X1 [Sesamum indicum] XP_020553438.1 protein ARABIDILLO 1 isoform X1 [Sesamum indicum] XP_020553439.1 protein ARABIDILLO 1 isoform X2 [Sesamum indicum]	IPR001810_F-box domain; IPR000225_Armadillo; IPR006553_Leucine-rich repeat, cysteine-containing subtype; IPR016024_Armadillo-type fold	AT3G60350.1	ARABIDILLO-2	ARABIDILLO-2	0.09	0.46	0.7	0.11	0.82	0.69	0.36	0.52	0.26	0.17	0.3	0.17	0.89	0.8	0.64	0.35	0.8	0.11	-1.14936	0.0323978	0.0998058	-1.46649	0.00712639	0.0343565	-0.317132	0.557458	0.734352	-0.519182	0.345812	0.617204	-0.132383	0.807761	0.956944	0.327157	0.539097	0.761612
Rg_000139	histone-lysine N-methyltransferase ATXR3-like isoform X1 [Sesamum indicum] XP_020555048.1 histone-lysine N-methyltransferase ATXR3-like isoform X1 [Sesamum indicum]	IPR001214_SET domain; IPR036047_F-box-like domain superfamily	AT4G15180.1	SDG2	SET domain protein 2	0	0.4	1.23	0.56	0.17	0.28	0.92	1.47	1.32	0.17	0	0	1.31	0.29	0.44	1.18	0.45	0	-1.74376	0.219877	0.399465	0.448319	0.751543	0.895643	2.19208	0.121698	0.269466	-1.46288	0.313235	0.583481	0.610324	0.668086	0.888753	0.860638	0.544262	0.765622
Rg_000140	uncharacterized protein LOC110664450 [Hevea brasiliensis]	IPR008906_HAT, C-terminal dimerisation domain; IPR007021_Domain of unknown function DUF659; IPR012337_Ribonuclease H-like superfamily	AT5G33406.1	.	hAT dimerization domain-containing protein / transposase-like protein	0.13	0.54	1.12	1.64	1.35	1.69	0.96	1.3	1.22	0.23	0.52	0.35	0.97	0.77	0.53	0.88	0.92	0.14	-0.146455	0.59437	0.759913	-0.308588	0.268743	0.484721	-0.162133	0.542451	0.722632	-1.23247	1.86255e-05	0.00020375	-1.04301	0.000221046	0.00293963	-1.21132	1.27995e-05	0.000137071
Rg_000141	.	.	.	.	.	0	0	0	0.01	0.66	0.01	0	0	0	0.85	7.83	0.8	2.68	4.62	2.71	1.31	1.49	0	5.59081	0.0113206	0.0448696	0	1	1	-6.58782	0.00284271	0.0157149	4.50442	0.0158711	0.0688427	1.71737	0.358833	0.669936	3.7011	0.0475258	0.149927
Rg_000142	.	.	.	.	.	0.24	0.44	0.65	0.32	0	0.22	7.46	4.86	5.02	0	0	0	0	0	0	0	0	0.15	-3.34212	0.155698	0.314711	1.98182	0.398202	0.620842	5.32394	0.0235822	0.0818531	-5.71673	0.0297279	0.112489	0.779964	0.741116	0.926798	-6.23672	0.0177202	0.0699103
Rg_000143	hypothetical protein F511_00295 [Dorcoceras hygrometricum]	IPR012337_Ribonuclease H-like superfamily; IPR001878_Zinc finger, CCHC-type; IPR025724_GAG-pre-integrase domain; IPR013103_Reverse transcriptase, RNA-dependent DNA polymerase; IPR036875_Zinc finger, CCHC-type superfamily; IPR001584_Integrase, catalytic core	AT4G23160.3	CRK8	cysteine-rich RECEPTOR-like kinase	0.79	2.57	5.39	4.7	3.15	4.12	22.84	21.13	2.12	0.89	0.32	1.47	2.79	2.62	2.56	2.81	5.72	0.56	-1.13882	0.0499764	0.137601	0.953023	0.100316	0.249828	2.09184	0.000304573	0.00253472	-1.20291	0.0397523	0.140856	-0.239564	0.680694	0.896056	-0.726511	0.211845	0.436341
Rg_000144	protein ddb_g0276689 [Phtheirospermum japonicum]	.	AT2G25730.3	.	zinc finger FYVE domain protein	0	0.21	0.12	0.26	0	0.19	0.17	0.12	0	0.51	0.2	0.32	0.48	0.69	0.62	0.17	0.18	0.07	-1.09359	0.346161	0.539781	-1.56677	0.183715	0.377621	-0.473187	0.685758	0.833512	2.20216	0.0531159	0.17546	0.708806	0.539177	0.80922	1.89327	0.0960598	0.252596
Rg_000145	protein transport protein Sec24-like At4g32640 [Sesamum indicum] XP_011073139.1 protein transport protein Sec24-like At4g32640 [Sesamum indicum] XP_011073140.1 protein transport protein Sec24-like At4g32640 [Sesamum indicum]	IPR036174_Zinc finger, Sec23/Sec24-type superfamily; IPR006896_Sec23/Sec24, trunk domain; IPR036175_Sec23/Sec24 helical domain superfamily; IPR006900_Sec23/Sec24, helical domain; IPR036180_Gelsolin-like domain superfamily; IPR006895_Zinc finger, Sec23/Sec24-type; IPR012990_Sec23/Sec24 beta-sandwich; IPR007123_Gelsolin-like domain; IPR036465_von Willebrand factor A-like domain superfamily	AT3G44340.3	CEF	hypothetical protein	0.13	0.36	0.52	2.39	1.81	2.06	0.43	2.32	0.93	1.01	0.58	0.41	1.84	1.65	1.33	2.08	2.87	0.14	0.827006	0.109674	0.244182	0.267335	0.607326	0.797079	-0.559671	0.268401	0.460875	-0.694455	0.172161	0.401152	-0.333664	0.510364	0.788852	-0.52299	0.300404	0.544408
Rg_000146	copia-type pol polyprotein [Trifolium medium]	.	.	.	.	0.05	0.65	0.43	0.87	2.09	1.12	0.55	1.05	0.36	0.71	1.88	1.65	2.62	2.9	2.72	2.22	5.9	0.5	0.19936	0.694056	0.835435	-0.693623	0.177439	0.368793	-0.892983	0.0751416	0.191309	0.881067	0.0744574	0.225068	1.15996	0.0186978	0.100592	0.848968	0.0847574	0.230689
Rg_000147	hypothetical protein [Beta vulgaris subsp. vulgaris]	IPR005135_Endonuclease/exonuclease/phosphatase; IPR012337_Ribonuclease H-like superfamily; IPR036691_Endonuclease/exonuclease/phosphatase superfamily; IPR000477_Reverse transcriptase domain; IPR002156_Ribonuclease H domain; IPR026960_Reverse transcriptase zinc-binding domain	AT1G22540.1	.	Major facilitator superfamily protein	0.39	0.75	2	0.03	0.02	0	0.77	0.78	0.44	0	0	0	0.02	0.02	0	0	0.02	0	-7.95258	1.48252e-22	1.2041e-19	-2.11179	6.995e-08	1.72531e-06	5.84079	8.88118e-13	7.77803e-11	-2.0274	0.1561	0.376333	-0.491444	0.695897	0.904401	-0.691365	0.594952	0.803005
Rg_000148	ABC transporter C family member 12-like isoform X3 [Sesamum indicum]	IPR006867_Domain of unknown function DUF632; IPR006868_Domain of unknown function DUF630	AT2G34660.3	ABCC2	multidrug resistance-associated protein 2	0.14	0.99	1.33	4.03	4.37	5.82	1.89	3.65	2.46	0.82	3.3	1.61	2.11	2.53	3	4.25	4.76	0.59	1.01072	0.0113777	0.0450315	0.413042	0.303325	0.523753	-0.597674	0.12697	0.27756	-0.510856	0.193114	0.432719	-0.378655	0.334496	0.647441	-1.04281	0.00790469	0.0363235
Rg_000149	putative nucleotidyltransferase, Ribonuclease H [Helianthus annuus]	IPR041373_Reverse transcriptase, RNase H-like domain; IPR012337_Ribonuclease H-like superfamily; IPR000477_Reverse transcriptase domain; IPR041588_Integrase zinc-binding domain; IPR001584_Integrase, catalytic core	AT3G18830.1	PMT5	polyol/monosaccharide transporter 5	0.04	0.52	0.65	0.55	0.61	0.69	0.28	0.18	0.05	0.35	0.21	0.58	0.55	0.35	0.63	0.64	0.65	0.11	-0.803565	0.138449	0.289183	-2.44851	2.02383e-05	0.000259186	-1.64495	0.00372299	0.0195297	0.225173	0.676703	0.876805	-0.11434	0.833704	0.967664	-0.414479	0.444018	0.686957
Rg_000150	uncharacterized protein LOC105164342 isoform X2 [Sesamum indicum]	IPR008395_Agenet-like domain	AT4G17330.3	G2484-1	G2484-1 protein	0.08	0.28	0.71	0.77	0.82	0.8	0.46	0.76	0.48	0.67	0.69	0.49	1.12	1.59	1.08	0.58	0.79	0.14	-0.321205	0.265336	0.452919	-0.576944	0.0520978	0.156432	-0.255739	0.360387	0.560635	0.524351	0.0558132	0.182238	-0.382856	0.184545	0.465513	0.506232	0.0592071	0.177009
Rg_000151	ATP-dependent helicase BRM isoform X1 [Sesamum indicum] XP_011092659.1 ATP-dependent helicase BRM isoform X1 [Sesamum indicum]	IPR000330_SNF2-related, N-terminal domain; IPR001487_Bromodomain; IPR014978_Glutamine-Leucine-Glutamine, QLQ; IPR036427_Bromodomain-like superfamily; IPR027417_P-loop containing nucleoside triphosphate hydrolase; IPR014001_Helicase superfamily 1/2, ATP-binding domain; IPR001650_Helicase, C-terminal	AT2G46020.3	BRM	transcription regulatory protein SNF2	0.55	4.18	11.97	19.82	19.07	19.42	11.28	14.37	10.31	6.14	6.56	8.57	17.79	15.23	16.35	6.11	23.54	1.68	0.570419	0.107346	0.240284	0.120889	0.733224	0.884232	-0.44953	0.202535	0.382483	-0.557943	0.114124	0.304525	-0.86025	0.0149711	0.0852149	-0.388175	0.270993	0.511577
Rg_000152	uncharacterized protein LOC105161334 [Sesamum indicum]	IPR021714_Nucleolar pre-ribosomal-associated protein 1, N-terminal; IPR032436_Nucleolar pre-ribosomal-associated protein 1, C-terminal domain; IPR016024_Armadillo-type fold	AT4G27010.2	EMB2788	ribosome 60S biogenesis amino-terminal protein	0.5	1.67	3.16	4.77	4.74	5.01	6.2	6.02	3.32	1.56	1.92	1.92	3.68	3.04	3.35	2.32	4.73	0.57	-0.160516	0.397647	0.591582	0.159704	0.400762	0.623364	0.320221	0.0812609	0.20243	-0.543764	0.00413429	0.0230277	-0.708982	0.000201494	0.00271721	-0.678656	0.000290632	0.00218461
Rg_000153	putative helicase [Handroanthus impetiginosus]	IPR009463_Domain of unknown function DUF1087; IPR009057_Homeobox-like domain superfamily; IPR014001_Helicase superfamily 1/2, ATP-binding domain; IPR027417_P-loop containing nucleoside triphosphate hydrolase; IPR000953_Chromo/chromo shadow domain; IPR016197_Chromo-like domain superfamily; IPR001650_Helicase, C-terminal; IPR023780_Chromo domain; IPR001965_Zinc finger, PHD-type; IPR000330_SNF2-rela…	AT5G44800.1	CHR4	chromatin remodeling 4	0.45	1.55	4.17	7.66	8.89	7.85	4.76	5.54	3.7	3.6	4.94	4.4	9.02	8.43	7.6	5.76	10.44	1.21	0.514067	0.00036742	0.00290324	-0.0495189	0.7366	0.886301	-0.563586	4.43387e-05	0.000502384	-0.0379747	0.782457	0.935375	-0.288726	0.0372868	0.164083	-0.115336	0.396453	0.643766
Rg_000154	hypothetical protein [Beta vulgaris subsp. vulgaris]	IPR005135_Endonuclease/exonuclease/phosphatase; IPR012337_Ribonuclease H-like superfamily; IPR036691_Endonuclease/exonuclease/phosphatase superfamily; IPR000477_Reverse transcriptase domain; IPR002156_Ribonuclease H domain; IPR026960_Reverse transcriptase zinc-binding domain	AT4G29090.1	.	Ribonuclease H-like superfamily protein	0.2	0.39	1.38	6.13	8.29	1.98	1.06	2.98	2.26	3.52	4.45	1.71	3.76	3.89	1.18	19.88	30.33	0.91	1.49025	0.0139252	0.0527666	0.392868	0.518209	0.727915	-1.09738	0.0671711	0.176722	0.140963	0.81367	0.95051	1.49296	0.0123986	0.0739143	-1.04657	0.0806754	0.222748
Rg_000155	histone-lysine N-methyltransferase ATXR3-like isoform X1 [Sesamum indicum] XP_020555048.1 histone-lysine N-methyltransferase ATXR3-like isoform X1 [Sesamum indicum]	IPR001214_SET domain; IPR036047_F-box-like domain superfamily	AT4G15180.1	SDG2	SET domain protein 2	1.12	5.38	12.74	20.1	21.75	19.95	11.04	12.92	11.83	7.71	10.42	9.57	20.02	19.72	16.63	12.81	25.48	2.65	0.266436	0.146123	0.300525	-0.253145	0.169356	0.357505	-0.519582	0.00422112	0.0216226	-0.277394	0.127067	0.328021	-0.425409	0.0195125	0.103697	-0.284064	0.116958	0.290984
Rg_000156	callose synthase 1 [Sesamum indicum] XP_011086997.1 callose synthase 1 [Sesamum indicum] XP_011087003.1 callose synthase 1 [Sesamum indicum] XP_020548943.1 callose synthase 1 [Sesamum indicum]	IPR003440_Glycosyl transferase, family 48	AT2G31960.2	GSL03	glucan synthase-like 3	0.2	0.55	1.03	0.97	1.06	0.45	1.68	2.38	3.91	0.47	0.83	0.28	1.16	1.24	0.81	0.98	1.72	0.14	-1.23146	0.0064454	0.0288811	0.816509	0.0667989	0.187197	2.04797	3.67391e-06	5.91593e-05	0.211746	0.6411	0.855298	0.304559	0.501997	0.783114	0.243327	0.588331	0.798118
Rg_000157	acetyl-CoA carboxylase 1-like isoform X1 [Sesamum indicum]	IPR011053_Single hybrid motif; IPR029045_ClpP/crotonase-like domain superfamily; IPR034733_Acetyl-CoA carboxylase; IPR000089_Biotin/lipoyl attachment; IPR013537_Acetyl-CoA carboxylase, central domain	AT1G36160.2	ACC1	acetyl-CoA carboxylase 1	0.12	0.39	0.19	0.31	0.88	0.54	0	0	0.62	0.23	0	0.87	3.62	1.29	0.6	0.4	1.33	0	-0.764944	0.646601	0.800238	-1.72469	0.302981	0.523434	-0.959745	0.565756	0.740971	0.274348	0.869268	0.979421	-0.452037	0.786753	0.947867	1.45018	0.383235	0.631028
Rg_000158	helicase protein MOM1 [Sesamum indicum] XP_020552603.1 helicase protein MOM1 [Sesamum indicum]	IPR016197_Chromo-like domain superfamily; IPR000330_SNF2-related, N-terminal domain; IPR000953_Chromo/chromo shadow domain; IPR027417_P-loop containing nucleoside triphosphate hydrolase; IPR011011_Zinc finger, FYVE/PHD-type; IPR001965_Zinc finger, PHD-type	AT1G08060.1	MOM	ATP-dependent helicase family protein	0.48	2.35	7.65	15.18	14.87	13.78	9.61	11.58	10.56	5	6.17	6.43	14.32	12.48	11.99	10.54	19.99	1.85	0.761698	0.000719775	0.00504069	0.569501	0.0116694	0.0506076	-0.192197	0.384843	0.584819	-0.425901	0.0551601	0.180629	-0.310988	0.161311	0.429914	-0.324633	0.142192	0.333553
Rg_000159	hypothetical protein CDL12_26455 [Handroanthus impetiginosus]	.	AT5G01010.3	.	retinal-binding protein	0.18	0.6	1.24	1.07	1.06	1.15	1.72	1.66	0.67	0.32	0.3	0.39	0.62	0.87	0.74	0.69	1.52	0.13	-0.873617	0.00238231	0.0131912	-0.355591	0.215039	0.419379	0.518026	0.0644521	0.17168	-0.80596	0.00813395	0.0401477	-0.390514	0.185597	0.467136	-0.677209	0.0204853	0.0783628
Rg_000160	helicase protein MOM1 [Sesamum indicum] XP_020552603.1 helicase protein MOM1 [Sesamum indicum]	IPR016197_Chromo-like domain superfamily; IPR000330_SNF2-related, N-terminal domain; IPR000953_Chromo/chromo shadow domain; IPR027417_P-loop containing nucleoside triphosphate hydrolase; IPR001965_Zinc finger, PHD-type; IPR011011_Zinc finger, FYVE/PHD-type	AT1G08060.1	MOM	ATP-dependent helicase family protein	0.31	1.29	1.14	0	0	0	2.46	1.77	0	0	0	0	0	0	0	0	0	0	-10.7287	0.0200325	0.0693884	-1.06713	0.810931	0.93276	9.66153	0.0362261	0.112792	0	1	1	0	1	1	0	1	1
Rg_000161	ATP-dependent helicase BRM isoform X1 [Sesamum indicum] XP_011092659.1 ATP-dependent helicase BRM isoform X1 [Sesamum indicum]	IPR012337_Ribonuclease H-like superfamily; IPR000477_Reverse transcriptase domain; IPR026960_Reverse transcriptase zinc-binding domain; IPR002156_Ribonuclease H domain	AT2G46020.3	BRM	transcription regulatory protein SNF2	0.04	0.37	0.81	0.76	0.79	0.79	1.42	2.18	0.54	0.16	0.28	0.26	0.6	0.36	0.53	0.62	0.63	0.09	-0.418732	0.301682	0.493198	0.576448	0.151289	0.330963	0.99518	0.0103423	0.0436058	-0.865957	0.0379808	0.136062	-0.556331	0.174515	0.449969	-0.809872	0.0458125	0.145727
Rg_000162	protein ddb_g0276689 [Phtheirospermum japonicum]	.	AT2G25730.3	.	zinc finger FYVE domain protein	0.25	1.87	3.65	6.4	5.52	5.36	5.21	6.06	4.91	2.63	3.58	2.9	4.43	4.28	4.71	2.95	6.2	0.68	0.168295	0.455201	0.644736	0.335776	0.137202	0.310284	0.167481	0.444911	0.640819	-0.0363127	0.869489	0.979526	-0.616595	0.00584684	0.0415029	-0.501499	0.023156	0.086301
Rg_000163	HEAT repeat-containing protein 5B [Sesamum indicum]	IPR016024_Armadillo-type fold	AT1G67140.1	SWEETIE	HEAT repeat-containing protein	0.17	0.6	1.13	3.62	3.25	2.78	2.45	3.05	1.24	0.76	1.2	0.81	1.09	2.46	1.53	2.39	2.3	0.41	0.75516	0.0180221	0.0640875	0.450546	0.161236	0.345724	-0.304614	0.321789	0.520707	-0.922399	0.00326981	0.0189057	-0.583956	0.0606939	0.229943	-1.04961	0.000731786	0.00487499
Rg_000164	hypothetical protein F511_00295 [Dorcoceras hygrometricum]	IPR012337_Ribonuclease H-like superfamily; IPR001878_Zinc finger, CCHC-type; IPR025724_GAG-pre-integrase domain; IPR013103_Reverse transcriptase, RNA-dependent DNA polymerase; IPR036875_Zinc finger, CCHC-type superfamily; IPR001584_Integrase, catalytic core	AT4G23160.3	CRK8	cysteine-rich RECEPTOR-like kinase	0.37	0	2.47	0.04	0.03	0	1.93	2.14	0.1	0.03	0	0	0.07	0	0	0.1	0.03	0	-7.04065	0.00121199	0.00767072	-0.843407	0.68729	0.852365	6.19724	0.00438552	0.0223065	0.249293	0.913341	0.998817	0.983391	0.661561	0.885185	-0.138262	0.951671	0.999807
Rg_000165	polyprotein [Broad bean wilt virus 2]	IPR000199_Peptidase C3A/C3B, picornaviral; IPR000605_Helicase, superfamily 3, single-stranded DNA/RNA virus; IPR027417_P-loop containing nucleoside triphosphate hydrolase; IPR001205_RNA-directed RNA polymerase, C-terminal domain; IPR004004_Helicase/polymerase/peptidase polyprotein, Calicivirus-type; IPR009003_Peptidase S1, PA clan	AT1G27600.2	IRX9-L	Nucleotide-diphospho-sugar transferases superfamily protein	152.04	634.02	0.06	3020.03	4759.36	1914.17	0.05	1004.7	9020.86	1398.4	6198.17	3982.85	3250.08	6860.57	1703.69	1408.26	1898.83	1290.17	1.29789	0.492405	0.677711	1.86842	0.323027	0.544927	0.57053	0.762829	0.88447	1.07466	0.569751	0.807475	0.143116	0.93966	1	0.138861	0.94145	0.995176
Rg_000166	uncharacterized protein LOC113735973 [Coffea arabica]	IPR026960_Reverse transcriptase zinc-binding domain; IPR002156_Ribonuclease H domain; IPR012337_Ribonuclease H-like superfamily; IPR005135_Endonuclease/exonuclease/phosphatase; IPR000477_Reverse transcriptase domain; IPR036691_Endonuclease/exonuclease/phosphatase superfamily	AT5G03080.1	LPPgamma	Phosphatidic acid phosphatase (PAP2) family protein	0.12	0.22	0.74	2.39	1.49	2.62	0.78	1.35	0.46	0.46	0.5	0.55	0.93	0.82	0.9	1.64	1.94	0.14	1.01842	0.00303829	0.015974	-0.102694	0.770966	0.90792	-1.12111	0.000671785	0.00486943	-1.22421	0.000267762	0.00219209	-0.751645	0.0228155	0.115707	-1.44602	1.33495e-05	0.000142323
Rg_000167	PREDICTED: uncharacterized protein LOC105975715 isoform X1 [Erythranthe guttata]	IPR041677_DNA2/NAM7 helicase, AAA domain; IPR041679_DNA2/NAM7 helicase-like, AAA domain; IPR027417_P-loop containing nucleoside triphosphate hydrolase	AT1G16800.2	.	P-loop containing nucleoside triphosphate hydrolases superfamily protein	0.51	1.8	2.3	4.35	2.84	3.15	4.19	5.43	3.57	0	1.45	0.62	2.21	4.88	1.21	3.68	3.61	0.67	-0.60916	0.45869	0.647856	-0.00448563	0.995646	1	0.604674	0.461147	0.655027	-1.5551	0.0597676	0.19162	-0.00253081	0.997543	1	-0.452816	0.581517	0.793149
Rg_000168	hypothetical protein [Beta vulgaris subsp. vulgaris]	IPR005135_Endonuclease/exonuclease/phosphatase; IPR012337_Ribonuclease H-like superfamily; IPR036691_Endonuclease/exonuclease/phosphatase superfamily; IPR000477_Reverse transcriptase domain; IPR002156_Ribonuclease H domain; IPR026960_Reverse transcriptase zinc-binding domain	AT4G29090.1	.	Ribonuclease H-like superfamily protein	0	0.46	0.48	3.29	5.19	1.5	0.85	1.12	0.54	1.22	1.49	0.85	1.04	0.47	0.87	8.94	10.99	0.22	2.03974	0.00617803	0.0279536	0.267012	0.721909	0.876342	-1.77273	0.0155736	0.0599136	-0.588154	0.420417	0.687602	0.830422	0.253725	0.558122	-2.21409	0.00258023	0.0143071
Rg_000169	glutamate synthase 1 [NADH], chloroplastic isoform X1 [Sesamum indicum]	IPR002489_Glutamate synthase, alpha subunit, C-terminal; IPR028261_Dihydroprymidine dehydrogenase domain II; IPR029055_Nucleophile aminohydrolases, N-terminal; IPR017932_Glutamine amidotransferase type 2 domain; IPR036485_Glutamate synthase, alpha subunit, C-terminal domain superfamily; IPR023753_FAD/NAD(P)-binding domain; IPR012220_Glutamate synthase, eukaryotic; IPR006982_Glutamate synthase, ce…	AT5G53460.1	GLT1	NADH-dependent glutamate synthase 1	1.15	4.86	14.34	47.85	47.91	52.09	38.64	54.63	141.1	9.31	9.06	12.21	142.67	126.77	60.67	25.1	73.94	4.76	1.50805	0.00230187	0.0128312	2.56434	2.17325e-07	4.74943e-06	1.05629	0.0323102	0.103432	-1.37299	0.00545189	0.0289789	-0.517443	0.294667	0.605172	0.988734	0.0451058	0.144016
Rg_000170	acetyl-CoA carboxylase 1-like isoform X1 [Sesamum indicum]	IPR005482_Biotin carboxylase, C-terminal; IPR029045_ClpP/crotonase-like domain superfamily; IPR013537_Acetyl-CoA carboxylase, central domain; IPR011054_Rudiment single hybrid motif; IPR034733_Acetyl-CoA carboxylase; IPR011053_Single hybrid motif; IPR000089_Biotin/lipoyl attachment; IPR005481_Biotin carboxylase-like, N-terminal domain; IPR005479_Carbamoyl-phosphate synthetase large subunit-like, A…	AT1G36160.2	ACC1	acetyl-CoA carboxylase 1	0.34	2.36	7.84	21.3	23.55	23.89	9.36	11.46	11.62	13	9.18	12.27	35.11	40.63	29.76	8.27	27.39	1.73	1.51096	9.25173e-05	0.000927551	0.705811	0.0682161	0.189975	-0.805149	0.0358956	0.112006	-0.0786887	0.837448	0.962203	-0.891195	0.020368	0.106828	0.464458	0.225431	0.454456
Rg_000171	protein CELLULOSE SYNTHASE INTERACTIVE 3 isoform X1 [Sesamum indicum] XP_011069442.1 protein CELLULOSE SYNTHASE INTERACTIVE 3 isoform X1 [Sesamum indicum] XP_011069447.1 protein CELLULOSE SYNTHASE INTERACTIVE 3 isoform X1 [Sesamum indicum] XP_011069454.1 protein CELLULOSE SYNTHASE INTERACTIVE 3 isoform X1 [Sesamum indicum] XP_020547409.1 protein CELLULOSE SYNTHASE INTERACTIVE 3 isoform X1 [Sesamu…	IPR000008_C2 domain; IPR016024_Armadillo-type fold; IPR000225_Armadillo	AT1G77460.3	.	CELLULOSE SYNTHASE INTERACTIVE 3	0.7	2.64	7.27	11.77	9.28	11.42	10.5	11.37	4.67	2	2.14	2.96	7.48	8.84	7.3	6.12	11.7	1.03	0.186243	0.445922	0.636335	0.0985545	0.687412	0.852437	-0.0876884	0.716435	0.85544	-1.29429	1.34061e-07	2.26702e-06	-0.674214	0.00563187	0.0402874	-0.600888	0.0130458	0.0547122
Rg_000172	PREDICTED: uncharacterized protein LOC105975715 isoform X1 [Erythranthe guttata]	IPR027417_P-loop containing nucleoside triphosphate hydrolase; IPR041677_DNA2/NAM7 helicase, AAA domain; IPR041679_DNA2/NAM7 helicase-like, AAA domain	AT1G16800.2	.	P-loop containing nucleoside triphosphate hydrolases superfamily protein	0.11	0.78	3.95	3.45	3.56	5.41	4.08	3.3	1.98	1.27	0.35	1.04	2.54	0	1.79	0.79	2.76	0	0.324495	0.782773	0.89665	0.125481	0.915124	0.996841	-0.199014	0.865518	0.944289	-1.26792	0.28143	0.547517	-2.25106	0.0565588	0.219287	-1.70213	0.148126	0.343025
Rg_000173	CCR4-NOT transcription complex subunit 1 isoform X2 [Sesamum indicum]	IPR024557_CCR4-Not complex, Not1 subunit, domain of unknown function DUF3819; IPR007196_CCR4-Not complex component, Not1, C-terminal; IPR032191_CCR4-NOT transcription complex subunit 1, CAF1-binding domain; IPR032193_CCR4-NOT transcription complex subunit 1, TTP binding domain; IPR032194_CCR4-NOT transcription complex subunit 1, HEAT repeat	AT1G02080.2	.	transcription regulator	1.39	5.01	13.15	22.32	23.11	22.77	13.59	16.52	13.57	9.8	11.55	10.53	23.26	21.28	20.72	16.91	24.58	3.07	0.34317	0.0093812	0.0388373	-0.0425991	0.748772	0.893817	-0.385769	0.00290144	0.0159714	-0.208686	0.108164	0.293255	-0.393862	0.00251521	0.021448	-0.214029	0.0974772	0.255349
Rg_000174	uncharacterized protein LOC105177625 isoform X2 [Sesamum indicum]	.	AT3G50370.2	.	hypothetical protein	0.04	0.21	0.68	1.12	1.25	1.8	1.25	0.99	1.02	0.23	0.33	0.06	0.65	0.32	0.39	0.35	1.86	0.03	0.900953	0.141095	0.293097	0.797046	0.1943	0.39176	-0.103907	0.861181	0.94187	-1.89443	0.00211157	0.0130459	-1.17857	0.0517144	0.206134	-1.79758	0.00304396	0.0164215
Rg_000175	pre-mRNA-processing-splicing factor 8A [Sesamum indicum]	IPR012337_Ribonuclease H-like superfamily; IPR012592_PROCN domain; IPR019582_RNA recognition motif, spliceosomal PrP8; IPR000555_JAB1/MPN/MOV34 metalloenzyme domain; IPR021983_PRP8 domain IV core; IPR019580_Pre-mRNA-processing-splicing factor 8, U6-snRNA-binding; IPR012591_PRO8NT domain; IPR012984_PROCT domain; IPR019581_Pre-mRNA-processing-splicing factor 8, U5-snRNA-binding	AT1G80070.1	SUS2	Pre-mRNA-processing-splicing factor	5.43	26.55	50.33	73.88	72.76	72.75	47.26	56.27	32.02	24.43	35.02	28.83	53.01	49.83	49.92	33.31	72.86	8.57	-0.0772004	0.664365	0.81367	-0.546501	0.00215983	0.0132882	-0.469301	0.00822948	0.0365125	-0.436847	0.0139828	0.0623373	-0.70564	7.31757e-05	0.0011549	-0.669212	0.000164891	0.00133153
Rg_000176	TSS isoform X2 [Olea europaea subsp. europaea]	IPR025697_CLU domain; IPR028275_Clustered mitochondria protein, N-terminal	AT4G28080.1	.	Tetratricopeptide repeat (TPR)-like superfamily protein	0	0	0.05	0	0.06	0.05	0	0.02	0.05	1.15	0.29	0.55	0.97	0.8	0.52	0.16	0.62	0.03	-0.0596125	0.959389	0.995524	-0.445642	0.716468	0.87256	-0.386029	0.728517	0.863296	5.10831	1.00061e-07	1.73308e-06	2.74165	0.00518428	0.0377988	4.15905	1.50099e-05	0.000158471
Rg_000177	Sister chromatid cohesion protein SCC2/Nipped-B [Handroanthus impetiginosus]	IPR011011_Zinc finger, FYVE/PHD-type; IPR026003_HEAT repeat associated with sister chromatid cohesion protein; IPR016024_Armadillo-type fold	AT5G15540.1	EMB2773	PHD finger family protein	0.07	0.82	1.24	0.86	0.9	0.92	1.8	1.37	1.5	0.52	0.58	0.61	1.14	1.14	0.74	0.75	1.18	0.07	-1.09804	0.00188756	0.0109441	-0.0246108	0.943803	1	1.07343	0.00183693	0.0111066	0.243097	0.493075	0.748369	-0.403132	0.267667	0.575018	0.0131894	0.970073	1
Rg_000178	uncharacterized protein LOC112196673 [Rosa chinensis] XP_024192857.1 uncharacterized protein LOC112196673 [Rosa chinensis]	IPR021109_Aspartic peptidase domain superfamily; IPR012337_Ribonuclease H-like superfamily; IPR041577_Reverse transcriptase/retrotransposon-derived protein, RNase H-like domain; IPR000477_Reverse transcriptase domain; IPR005162_Retrotransposon gag domain; IPR001584_Integrase, catalytic core; IPR041588_Integrase zinc-binding domain	AT5G06300.1	LOG7	Putative lysine decarboxylase family protein	0.02	0.07	0.08	3.84	1.03	0.88	0.1	0.15	0.48	5.54	55.44	6.62	7.58	4.2	14.21	1.62	4.72	0.26	3.35723	0.000137204	0.00128996	0.848666	0.343228	0.566624	-2.50857	0.00250915	0.0142151	4.3598	7.79976e-08	1.37753e-06	0.214895	0.792131	0.949912	2.11334	0.00926157	0.0413431
Rg_000179	hypothetical protein [Beta vulgaris subsp. vulgaris]	IPR012337_Ribonuclease H-like superfamily; IPR000477_Reverse transcriptase domain; IPR036691_Endonuclease/exonuclease/phosphatase superfamily; IPR026960_Reverse transcriptase zinc-binding domain; IPR005135_Endonuclease/exonuclease/phosphatase; IPR002156_Ribonuclease H domain	AT1G75500.2	WAT1	Walls Are Thin 1	0.81	5.01	23.86	0.67	0.32	0.63	23.41	20.23	16.21	0.06	0.04	0.15	0.23	0.12	0.09	1.78	2.14	0.42	-5.29481	2.27562e-26	3.65353e-23	0.172168	0.722519	0.876798	5.46698	4.4523e-28	3.99323e-25	-1.77641	0.00199331	0.0124245	1.82722	0.000291312	0.00369696	-2.0672	0.000247515	0.00190257
Rg_000180	mediator of RNA polymerase II transcription subunit 12 isoform X1 [Sesamum indicum] XP_011092379.1 mediator of RNA polymerase II transcription subunit 12 isoform X1 [Sesamum indicum] XP_011092387.1 mediator of RNA polymerase II transcription subunit 12 isoform X1 [Sesamum indicum]	IPR019035_Mediator complex, subunit Med12	AT4G00450.2	CCT	RNA polymerase II transcription mediator	0.8	4.75	7.69	10.66	11.93	9.96	7.67	8.28	5.63	4.82	7.65	5.24	12.35	11.83	12.4	8.68	13.79	1.57	-0.214263	0.235064	0.417691	-0.566417	0.00183426	0.0116208	-0.352154	0.0487466	0.140493	-0.00996435	0.955562	1	-0.244762	0.172847	0.447556	0.0235468	0.894611	0.973839
Rg_000181	cellulose synthase A catalytic subunit 4 [Paulownia fortunei]	IPR000719_Protein kinase domain; IPR011009_Protein kinase-like domain superfamily; IPR001611_Leucine-rich repeat; IPR013210_Leucine-rich repeat-containing N-terminal, plant-type; IPR003591_Leucine-rich repeat, typical subtype	AT5G44030.2	CESA4	cellulose synthase A4	0.27	0.31	1.65	1.68	2.51	1.06	2.02	2.3	0.72	0.41	0.42	0.41	0.69	0.41	0.57	6.32	6.26	0.32	-0.343491	0.48054	0.667367	-0.210782	0.665736	0.837627	0.132709	0.782894	0.896411	-1.17616	0.0171908	0.0733279	1.25286	0.00900454	0.0580135	-1.81084	0.000255069	0.00195103
Rg_000182	uncharacterized protein LOC105180271 [Sesamum indicum]	IPR005135_Endonuclease/exonuclease/phosphatase; IPR000477_Reverse transcriptase domain; IPR036691_Endonuclease/exonuclease/phosphatase superfamily	AT3G49640.3	.	Aldolase-type TIM barrel family protein	0.07	0.19	0.48	0.3	0.57	0.06	0.49	0.54	0	0.28	0.33	0.17	0.42	0.65	0.45	0.2	0.59	0.13	-1.25417	0.144903	0.298608	-0.975191	0.257834	0.472254	0.278976	0.744964	0.874111	0.650284	0.448471	0.711911	0.571171	0.506342	0.785857	0.570909	0.503728	0.735051
Rg_000183	serine/threonine-protein kinase TOR [Sesamum indicum] XP_011088034.1 serine/threonine-protein kinase TOR [Sesamum indicum] XP_020551780.1 serine/threonine-protein kinase TOR [Sesamum indicum]	IPR036738_FKBP12-rapamycin binding domain superfamily; IPR003152_FATC domain; IPR011990_Tetratricopeptide-like helical domain superfamily; IPR009076_FKBP12-rapamycin binding domain; IPR000403_Phosphatidylinositol 3-/4-kinase, catalytic domain; IPR003151_PIK-related kinase, FAT; IPR011009_Protein kinase-like domain superfamily	AT1G50030.1	TOR	target of rapamycin	0	0	0.19	0.27	0.65	0	0	0.46	0.17	0.75	0.58	0.2	0.53	0.54	0.28	0	0.3	0	1.5636	0.383316	0.577353	1.21367	0.499757	0.71195	-0.34993	0.840962	0.930635	1.66992	0.336022	0.60686	-2.12787	0.233655	0.533291	0.401418	0.81739	0.937108
Rg_000184	ABC transporter C family member 12-like isoform X3 [Sesamum indicum]	IPR036640_ABC transporter type 1, transmembrane domain superfamily; IPR027417_P-loop containing nucleoside triphosphate hydrolase; IPR003439_ABC transporter-like; IPR003593_AAA+ ATPase domain; IPR011527_ABC transporter type 1, transmembrane domain	AT2G34660.2	ABCC2	multidrug resistance-associated protein 2	0.46	2.14	4.58	7.99	7.01	5.98	7.94	9.22	5.88	3.29	5.89	3.81	5.35	4.11	3.84	2.71	5.44	0.58	0.0569957	0.74622	0.873281	0.437123	0.013115	0.0555611	0.380128	0.0252494	0.0860946	0.17834	0.298529	0.566661	-1.08411	1.14291e-09	6.09923e-08	-0.807595	3.21158e-06	3.91037e-05
Rg_000185	putative transcription factor 5qNCA, contains JmjC domain [Handroanthus impetiginosus]	IPR003347_JmjC domain; IPR018866_Zinc-finger domain of monoamine-oxidase A repressor R1	AT1G11950.1	.	Transcription factor jumonji (jmjC) domain-containing protein	0.1	0.17	0.13	2.01	2.36	1.66	0.92	0.45	0.72	0.48	0.51	0.7	1.02	1.07	0.74	1.15	2.01	0.18	1.79543	0.000137856	0.00129468	0.567368	0.23651	0.446509	-1.22806	0.00569951	0.0273943	-0.938463	0.0350686	0.127807	-0.728254	0.100758	0.321192	-1.24428	0.00501325	0.0248641
Rg_000186	uncharacterized protein LOC101212255 isoform X1 [Cucumis sativus]	IPR012337_Ribonuclease H-like superfamily; IPR036875_Zinc finger, CCHC-type superfamily; IPR001584_Integrase, catalytic core; IPR025724_GAG-pre-integrase domain; IPR001878_Zinc finger, CCHC-type; IPR013103_Reverse transcriptase, RNA-dependent DNA polymerase	AT4G23160.3	CRK8	cysteine-rich RECEPTOR-like kinase	0.09	0.11	0.28	0.53	0.16	0.63	0.43	0.7	0.31	0.41	0.26	0.32	1.24	1.04	0.79	0.97	1.39	0.06	-0.3783	0.501642	0.685685	-0.0515943	0.927117	1	0.326705	0.549103	0.727634	0.518903	0.343624	0.614943	0.783155	0.150838	0.413219	1.0594	0.0489394	0.153355
Rg_000187	serine/threonine-protein kinase TOR [Sesamum indicum] XP_011088034.1 serine/threonine-protein kinase TOR [Sesamum indicum] XP_020551780.1 serine/threonine-protein kinase TOR [Sesamum indicum]	IPR016024_Armadillo-type fold; IPR003151_PIK-related kinase, FAT; IPR024585_Domain of unknown function DUF3385, target of rapamycin protein; IPR011009_Protein kinase-like domain superfamily; IPR036738_FKBP12-rapamycin binding domain superfamily; IPR011990_Tetratricopeptide-like helical domain superfamily; IPR003152_FATC domain; IPR009076_FKBP12-rapamycin binding domain; IPR000403_Phosphatidylinos…	AT1G50030.1	TOR	target of rapamycin	1.11	3.13	6.23	6.27	9.32	4.68	5.37	7.03	2.79	0.95	0.97	2.7	2.6	3.61	1.97	6.05	7.99	1.21	-0.711034	0.0792875	0.193324	-0.928519	0.0221818	0.083082	-0.217485	0.590966	0.761051	-1.22717	0.00264167	0.0157662	-0.108456	0.789006	0.948668	-1.4556	0.000350273	0.00257175
Rg_000188	pectinesterase [Sesamum indicum]	IPR000070_Pectinesterase, catalytic; IPR006501_Pectinesterase inhibitor domain; IPR035513_Invertase/pectin methylesterase inhibitor domain superfamily; IPR011050_Pectin lyase fold/virulence factor	AT3G10720.1	.	Plant invertase/pectin methylesterase inhibitor superfamily	0.06	0.39	0.73	0.65	1.7	1	11	8.49	6.53	0.09	0.13	0.16	0.34	0.17	0.08	0.15	0.62	0.06	0.0849721	0.85915	0.939129	3.27217	4.56935e-12	2.7312e-10	3.18719	3.33988e-12	2.57112e-10	-2.23478	1.32876e-05	0.000149989	-1.92384	0.000123407	0.0017948	-2.71315	1.14516e-07	1.85994e-06
Rg_000189	hypothetical protein [Beta vulgaris subsp. vulgaris]	IPR026960_Reverse transcriptase zinc-binding domain; IPR005135_Endonuclease/exonuclease/phosphatase; IPR036691_Endonuclease/exonuclease/phosphatase superfamily; IPR000477_Reverse transcriptase domain; IPR002156_Ribonuclease H domain; IPR012337_Ribonuclease H-like superfamily	AT5G52450.1	.	MATE efflux family protein	0	0	0.47	7.88	6.32	5.33	0.04	1.39	0	0.12	0.15	2	0.64	0.92	2.04	0.3	1.4	0.14	4.70041	0.00479293	0.0229466	0.980236	0.55775	0.76093	-3.72018	0.0236731	0.0820501	-2.18186	0.183637	0.418831	-3.18971	0.0523757	0.207941	-2.53334	0.122561	0.300622
Rg_000190	uncharacterized protein LOC105164342 isoform X4 [Sesamum indicum]	IPR008395_Agenet-like domain; IPR014002_Agenet domain, plant type	AT4G17330.1	G2484-1	G2484-1 protein	2.07	6.39	17.23	12.84	13.62	12.39	14.75	13.73	2.59	5.06	6.23	6.59	15.69	15.28	12.43	2.68	17.2	1.01	-0.897616	0.0586181	0.154653	-1.06252	0.025287	0.0918328	-0.164901	0.728217	0.86301	-0.232224	0.624831	0.844349	-0.933637	0.0497311	0.200783	0.00838151	0.985903	1
Rg_000191	MAG2-interacting protein 2 isoform X1 [Sesamum indicum]	IPR036322_WD40-repeat-containing domain superfamily; IPR013244_Sec39 domain	AT5G24350.1	.	neuroblastoma-amplified sequence protein	0.67	2.77	5.35	8.73	9.21	7.62	7.58	7.56	4.98	3.75	4.69	4.52	7.99	8.45	7.7	5.87	10.01	2.72	-0.0028291	0.992807	1	-0.109149	0.728491	0.880801	-0.106319	0.732817	0.866234	-0.0905941	0.771572	0.929763	0.191612	0.538743	0.808858	-0.224891	0.470237	0.708433
Rg_000192	uncharacterized protein LOC105164342 isoform X4 [Sesamum indicum]	IPR014002_Agenet domain, plant type; IPR008395_Agenet-like domain	AT4G17330.1	G2484-1	G2484-1 protein	0.39	3.97	5.24	15.92	17.55	16.67	5.78	8.8	13.64	7.27	10.23	8.5	20.69	19.03	19.56	13.75	16.71	2.69	0.93661	0.0177625	0.0633939	0.44122	0.264731	0.479816	-0.49539	0.207184	0.388484	-0.0732709	0.851998	0.970282	-0.279405	0.477074	0.765912	0.0916053	0.815381	0.936286
Rg_000193	G patch domain-containing protein TGH [Sesamum indicum]	IPR000061_SWAP/Surp; IPR035967_SWAP/Surp superfamily	AT5G23080.1	TGH	SWAP (Suppressor-of-White-APricot)/surp domain-containing protein	0.59	2.85	5.36	4.04	4.79	3.73	1.93	2.36	1.53	2.98	5.56	3.46	8.89	6.98	5.97	12.05	17.92	1.45	-0.997398	8.93051e-07	1.84868e-05	-1.86773	4.29274e-19	8.25509e-17	-0.87033	2.60245e-05	0.000318847	0.789826	8.36834e-05	0.000782903	1.39255	2.85438e-12	2.42436e-10	0.638709	0.00138864	0.00846325
Rg_000194	protein transport protein Sec24-like At4g32640 [Sesamum indicum] XP_011073139.1 protein transport protein Sec24-like At4g32640 [Sesamum indicum] XP_011073140.1 protein transport protein Sec24-like At4g32640 [Sesamum indicum]	IPR012990_Sec23/Sec24 beta-sandwich; IPR006900_Sec23/Sec24, helical domain; IPR006895_Zinc finger, Sec23/Sec24-type; IPR036174_Zinc finger, Sec23/Sec24-type superfamily; IPR007123_Gelsolin-like domain; IPR036175_Sec23/Sec24 helical domain superfamily; IPR036180_Gelsolin-like domain superfamily; IPR006896_Sec23/Sec24, trunk domain; IPR036465_von Willebrand factor A-like domain superfamily	AT4G32640.2	.	Sec23/Sec24 protein transport family protein	0.81	2.5	8.18	23.85	10.79	7.54	10.88	10.09	6.05	8	6.38	5.54	40.19	17.76	13.35	25.18	22.32	1.44	0.421333	0.357847	0.551702	0.0511642	0.911182	0.994739	-0.370169	0.417653	0.616725	-0.121021	0.791074	0.93928	0.256724	0.573961	0.831667	0.619166	0.174669	0.383601
Rg_000195	uncharacterized protein LOC105180271 [Sesamum indicum]	IPR026960_Reverse transcriptase zinc-binding domain; IPR000477_Reverse transcriptase domain; IPR036691_Endonuclease/exonuclease/phosphatase superfamily	AT3G24255.5	.	RNA-directed DNA polymerase (reverse transcriptase)-related family protein	0.31	0.92	3.15	14.16	10.05	14.58	12.46	17.66	0.32	2.8	2.75	2.76	4.64	3.24	3.67	4.81	6.6	0.92	1.73992	0.01129	0.0447742	1.49222	0.0298483	0.103873	-0.247701	0.716824	0.855747	-1.31832	0.053973	0.177648	-1.38416	0.043108	0.18165	-1.89873	0.00551891	0.0269374
Rg_000196	putative E3 ubiquitin-protein ligase LIN-1 [Sesamum indicum]	IPR001680_WD40 repeat; IPR036322_WD40-repeat-containing domain superfamily; IPR016024_Armadillo-type fold	AT3G06880.3	.	Transducin/WD40 repeat-like superfamily protein	0.22	0.9	2.8	8.84	6.2	6.86	0.72	1.58	3.47	0.52	0.17	0.52	5.19	4.69	5.72	2.39	6.94	0.81	1.12935	0.0437988	0.124934	-0.403581	0.473365	0.689205	-1.53293	0.00595707	0.0283485	-3.19299	1.9711e-08	3.8685e-07	-0.854638	0.124898	0.36899	-0.618947	0.26523	0.504845
Rg_000197	uncharacterized protein LOC105180271 [Sesamum indicum]	IPR026960_Reverse transcriptase zinc-binding domain; IPR036691_Endonuclease/exonuclease/phosphatase superfamily; IPR000477_Reverse transcriptase domain	AT2G38670.1	PECT1	phosphorylethanolamine cytidylyltransferase 1	0	0	0	4.53	5.17	5.75	0.07	6.19	0	0.61	1.27	1.35	1.92	2.32	1.88	2.57	4.1	0.5	9.97345	2.88592e-09	1.35442e-07	8.68143	2.3959e-07	5.17539e-06	-1.29203	0.281343	0.47569	-1.41106	0.239703	0.496635	-0.888859	0.458652	0.752019	-1.48837	0.214642	0.439871
Rg_000198	RNA helicase BRR2, DEAD-box superfamily [Handroanthus impetiginosus]	IPR011545_DEAD/DEAH box helicase domain; IPR014756_Immunoglobulin E-set; IPR001650_Helicase, C-terminal; IPR027417_P-loop containing nucleoside triphosphate hydrolase; IPR041094_Brr2, N-terminal helicase PWI domain; IPR014001_Helicase superfamily 1/2, ATP-binding domain; IPR003593_AAA+ ATPase domain; IPR004179_Sec63 domain; IPR036390_Winged helix DNA-binding domain superfamily	AT1G20960.1	emb1507	U5 small nuclear ribonucleoprotein helicase	2.18	10.23	19.83	25.61	25.26	26.31	18.45	21.72	13.79	8.04	10.29	9.87	19.28	17.04	16.4	14.57	24.45	2.85	-0.241576	0.0561588	0.149785	-0.523382	3.89013e-05	0.000456111	-0.281806	0.0245798	0.0844854	-0.568805	6.91998e-06	8.31805e-05	-0.678992	8.67315e-08	3.0832e-06	-0.701603	2.45136e-08	4.48853e-07
Rg_000199	uncharacterized protein LOC18046468 isoform X2 [Citrus clementina]	IPR001584_Integrase, catalytic core; IPR013103_Reverse transcriptase, RNA-dependent DNA polymerase; IPR025724_GAG-pre-integrase domain; IPR012337_Ribonuclease H-like superfamily	AT4G23160.3	CRK8	cysteine-rich RECEPTOR-like kinase	0.09	0.52	0.82	0.39	0.49	0.32	7.89	7.1	0.75	0.12	0.08	0.06	0.29	0.28	0.36	0.21	0.57	0.07	-1.76241	0.00322903	0.0167636	2.09071	0.000344177	0.00291653	3.85313	4.67927e-11	2.75581e-09	-1.38605	0.0341007	0.125106	-0.240732	0.696259	0.904607	-0.52351	0.392317	0.63967
Rg_000200	serine/threonine-protein kinase/endoribonuclease IRE1a-like isoform X1 [Sesamum indicum] XP_011096965.1 serine/threonine-protein kinase/endoribonuclease IRE1a-like isoform X1 [Sesamum indicum]	IPR000719_Protein kinase domain; IPR018997_PUB domain; IPR011009_Protein kinase-like domain superfamily; IPR010513_KEN domain	AT2G17520.1	IRE1A	Endoribonuclease/protein kinase IRE1-like protein	0	0.14	0.26	0.31	0.26	0.15	1.24	0.91	0.22	0.55	0.67	0.64	0.47	0.15	0	0.39	0.47	0.05	-0.391139	0.65804	0.808376	1.50768	0.0838761	0.220165	1.89882	0.0252977	0.0862317	2.27158	0.00745915	0.0374249	0.540038	0.532621	0.804786	-0.444571	0.610718	0.81429
Rg_000201	pentatricopeptide repeat-containing protein At5g64320, mitochondrial [Sesamum indicum]	IPR002885_Pentatricopeptide repeat	AT5G64320.1	.	Pentatricopeptide repeat (PPR) superfamily protein	0.18	0.42	1.44	6.62	4.31	5.75	3.74	5.48	3.16	1.73	0.66	1.55	2.25	1.35	1.84	2.51	3.22	0.74	1.54562	0.00014551	0.00135678	1.35239	0.000912029	0.00657447	-0.193222	0.624284	0.787104	-1.11443	0.00515859	0.0276649	-0.857332	0.0310795	0.144341	-1.75763	1.06128e-05	0.000115708
Rg_000202	glycerophosphodiester phosphodiesterase GDPD4 isoform X2 [Nicotiana tomentosiformis] XP_016497383.1 PREDICTED: glycerophosphodiester phosphodiesterase GDPD4-like isoform X2 [Nicotiana tabacum]	IPR030395_Glycerophosphodiester phosphodiesterase domain; IPR017946_PLC-like phosphodiesterase, TIM beta/alpha-barrel domain superfamily	AT1G71340.1	GDPD4	PLC-like phosphodiesterases superfamily protein	0	0.02	0.13	0.06	0.13	0.1	0.27	0.17	0.18	0.22	0.07	0.06	0.45	0.52	0.12	1.01	1.13	0	-0.187456	0.860718	0.939781	1.16008	0.269683	0.48591	1.34753	0.175899	0.347491	1.25515	0.211242	0.457981	2.6271	0.0077557	0.05174	1.72137	0.0819804	0.225319
Rg_000203	HEAT repeat-containing protein 5B [Sesamum indicum]	.	AT1G67140.1	SWEETIE	HEAT repeat-containing protein	0.07	0.33	0.87	2.51	1.64	1.37	0.61	1.64	1.17	0.45	0.27	0.71	2.05	0.82	1.23	1.54	1.94	0.19	0.72178	0.105586	0.237484	0.311684	0.488197	0.702027	-0.410096	0.341782	0.541961	-0.998588	0.0231645	0.092745	-0.435507	0.316392	0.628651	-0.578404	0.180331	0.391933
Rg_000204	Protein STRUBBELIG-RECEPTOR FAMILY 8 [Hibiscus syriacus]	IPR013103_Reverse transcriptase, RNA-dependent DNA polymerase; IPR012337_Ribonuclease H-like superfamily	AT4G23160.3	CRK8	cysteine-rich RECEPTOR-like kinase	0.12	0.46	1.65	5.2	6.63	6.84	2.58	2.84	1.77	4.15	3.23	5.99	11.46	14.77	19.13	12.83	23.25	1.76	1.74572	2.72049e-07	6.73653e-06	0.592766	0.0839795	0.220352	-1.15296	0.000422711	0.00332007	0.421426	0.193294	0.433008	1.05802	0.00106082	0.0106748	1.14037	0.000406784	0.00292791
Rg_000205	PREDICTED: callose synthase 9 [Erythranthe guttata] XP_012828940.1 PREDICTED: callose synthase 9 [Erythranthe guttata] XP_012828941.1 PREDICTED: callose synthase 9 [Erythranthe guttata]	IPR026899_1,3-beta-glucan synthase subunit FKS1-like, domain-1	AT3G07160.2	GSL10	glucan synthase-like 10	0	0.2	0.5	0.68	0.37	0.75	5.01	4.11	1.49	0.18	0.2	0.28	0.28	0.64	0.21	0.22	0.42	0.13	0.199792	0.767979	0.887613	2.95668	1.01031e-05	0.000140283	2.75689	2.00522e-05	0.000255298	-0.532386	0.426333	0.693192	-0.502322	0.452886	0.747902	-0.7992	0.229759	0.460135
Rg_000206	PREDICTED: metacaspase-3-like [Erythranthe guttata]	IPR029030_Caspase-like domain superfamily	AT1G02170.1	MC1	metacaspase 1	0.09	0.13	1.26	0	0	0.02	1.03	0.15	1.5	0.87	2.31	1.77	0.65	0.14	1.11	1.56	1.57	0.22	-8.16549	1.2794e-08	4.89069e-07	0.0743743	0.928205	1	8.23986	8.50412e-09	2.86714e-07	9.56331	2.2361e-11	6.65573e-10	8.39766	4.48125e-09	2.11272e-07	7.21035	4.92161e-07	7.03059e-06
Rg_000207	PREDICTED: retrovirus-related Pol polyprotein from transposon TNT 1-94 [Erythranthe guttata]	IPR013103_Reverse transcriptase, RNA-dependent DNA polymerase	AT4G17690.1	.	Peroxidase superfamily protein	0.27	0.6	1.29	0.52	0.73	0.6	2.01	2.54	2.33	0.1	0.09	0.17	0.24	0.21	0.26	0.16	0.27	0.1	-1.90716	2.80851e-06	4.9236e-05	0.249029	0.530014	0.738064	2.15619	6.72329e-08	1.78112e-06	-1.45806	0.00167355	0.0107469	-1.12921	0.0115964	0.0703271	-1.51828	0.000667647	0.00450583
Rg_000208	inositol hexakisphosphate and diphosphoinositol-pentakisphosphate kinase 2-like isoform X2 [Sesamum indicum]	IPR000560_Histidine phosphatase superfamily, clade-2; IPR029033_Histidine phosphatase superfamily	AT3G01310.2	.	Phosphoglycerate mutase-like family protein	0.07	0.14	0.29	0.59	0.66	0.62	1.34	1.52	1.37	0.48	0.55	0.51	1.47	0.95	1.24	1.38	1.6	0.22	0.281481	0.344938	0.538596	1.70929	2.79912e-09	9.45877e-08	1.42781	4.25844e-09	1.53962e-07	0.596424	0.0214865	0.0875622	0.986418	8.9541e-05	0.00137142	0.809344	0.00111765	0.00702476
Rg_000209	.	.	.	.	.	0.13	0.44	0.73	2.11	2.4	2.78	23.06	24.41	1.78	1.77	4.85	2.28	4.62	5.74	5.49	5.86	5.89	0.38	0.810191	0.174942	0.341229	3.68212	6.13694e-10	2.42657e-08	2.87193	8.57904e-07	1.6601e-05	1.10239	0.0596038	0.191284	0.723871	0.21677	0.510952	0.970463	0.0969726	0.254381
Rg_000210	HEAT repeat-containing protein 5B [Sesamum indicum]	IPR016024_Armadillo-type fold	AT1G67140.1	SWEETIE	HEAT repeat-containing protein	0.96	4.02	9.97	23.66	24.23	24.7	17.12	20.08	15.3	7.54	6.89	7.87	14.39	13.5	12.3	13.48	23.05	2.61	0.839279	2.72715e-07	6.74586e-06	0.621226	0.000148861	0.00143286	-0.218053	0.171505	0.341506	-0.797886	7.1439e-07	1.05225e-05	-0.697729	1.44277e-05	0.000282983	-1.00524	3.65877e-10	8.95837e-09
Rg_000211	calpain-type cysteine protease DEK1 [Sesamum indicum] XP_011089165.1 calpain-type cysteine protease DEK1 [Sesamum indicum]	IPR022683_Peptidase C2, calpain, domain III; IPR001300_Peptidase C2, calpain, catalytic domain; IPR022684_Peptidase C2, calpain family; IPR038765_Papain-like cysteine peptidase superfamily; IPR013320_Concanavalin A-like lectin/glucanase domain superfamily; IPR022682_Peptidase C2, calpain, large subunit, domain III; IPR036213_Calpain large subunit, domain III superfamily	AT1G55350.4	DEK1	calpain-type cysteine protease family	1.33	5	11.06	17.15	18.61	16.18	15.14	16.98	13.69	9.1	7.32	9.92	16.3	15.29	14.05	12.75	21.37	2.4	0.0666107	0.705631	0.843704	0.142412	0.420246	0.641147	0.0758017	0.662882	0.816653	-0.0652155	0.708778	0.895378	-0.317736	0.0697132	0.252476	-0.336356	0.0535694	0.164023
Rg_000212	protein CHROMATIN REMODELING 5 isoform X1 [Sesamum indicum] XP_011090160.1 protein CHROMATIN REMODELING 5 isoform X1 [Sesamum indicum] XP_011090161.1 protein CHROMATIN REMODELING 5 isoform X1 [Sesamum indicum] XP_020552647.1 protein CHROMATIN REMODELING 5 isoform X1 [Sesamum indicum]	IPR000953_Chromo/chromo shadow domain; IPR016197_Chromo-like domain superfamily; IPR027417_P-loop containing nucleoside triphosphate hydrolase; IPR001650_Helicase, C-terminal; IPR014001_Helicase superfamily 1/2, ATP-binding domain; IPR023780_Chromo domain; IPR000330_SNF2-related, N-terminal domain	AT2G13370.2	CHR5	chromatin remodeling 5	0	0.11	0.1	0.77	0.94	0.45	1	0.75	0.56	0.28	0.22	0.36	0.82	0.48	0.55	0.45	0.66	0.06	1.74024	0.000386464	0.00302002	2.08791	2.10555e-05	0.000268194	0.347679	0.388793	0.588731	-0.412229	0.326681	0.597044	-0.752325	0.0779058	0.271589	-0.36813	0.369978	0.618316
Rg_000213	uncharacterized protein LOC112032201 [Quercus suber]	IPR026960_Reverse transcriptase zinc-binding domain; IPR012337_Ribonuclease H-like superfamily; IPR036691_Endonuclease/exonuclease/phosphatase superfamily; IPR002156_Ribonuclease H domain; IPR000477_Reverse transcriptase domain	AT4G17260.1	.	Lactate/malate dehydrogenase family protein	1.39	4.74	11.77	8.59	7.59	9.21	23.27	23.44	0.38	2.01	1.5	3.17	5.43	3.8	4.31	8.37	12.6	1.49	-0.988156	0.171526	0.336696	0.01604	0.982288	1	1.0042	0.164332	0.331675	-1.01261	0.161873	0.385581	0.0290495	0.967943	1	-1.06316	0.141599	0.332635
Rg_000214	1-phosphatidylinositol-3-phosphate 5-kinase FAB1A [Sesamum indicum]	IPR002498_Phosphatidylinositol-4-phosphate 5-kinase, core; IPR027409_GroEL-like apical domain superfamily; IPR002423_Chaperonin Cpn60/TCP-1 family	AT3G14270.2	FAB1B	phosphatidylinositol-4-phosphate 5-kinase family protein	0.04	0.35	0.94	0.43	0.71	0.64	0.4	0.57	0.69	0.55	1.48	0.73	1.93	1.84	2.71	0.56	0.56	0.1	-0.832634	0.0666235	0.169867	-0.681335	0.135799	0.308149	0.1513	0.735374	0.867834	1.44983	0.000977626	0.00680027	-0.276259	0.548415	0.815375	1.70781	8.92772e-05	0.000774362
Rg_000215	callose synthase 11 [Sesamum indicum]	IPR003440_Glycosyl transferase, family 48; IPR026899_1,3-beta-glucan synthase subunit FKS1-like, domain-1	AT4G04970.1	GSL1	glucan synthase-like 1	0	0.47	0.22	0.77	2.55	1	1.89	1.93	1.26	0.48	0.63	0.67	0.96	0.95	0.53	0.32	0.86	0.11	1.10735	0.112468	0.248702	1.55443	0.0258715	0.0933707	0.447084	0.508739	0.695402	-0.417103	0.540739	0.78642	-1.49554	0.0307944	0.143439	-1.01089	0.138516	0.327388
Rg_000216	vacuolar-sorting receptor 6 [Sesamum indicum]	IPR001881_EGF-like calcium-binding domain; IPR003137_PA domain	AT1G30900.1	VSR6	VACUOLAR SORTING RECEPTOR 6	0.14	0.36	0.78	1.19	0.82	1.21	0.53	0.51	0.18	0.37	0.57	0.53	1.12	0.62	0.53	0.67	1.28	0.26	-0.303194	0.42817	0.620322	-1.48905	0.000204888	0.00188146	-1.18585	0.00228349	0.0131834	-0.260534	0.493458	0.748659	-0.088495	0.815022	0.959427	-0.679774	0.073011	0.2072
Rg_000217	calpain-type cysteine protease DEK1 [Sesamum indicum] XP_011089165.1 calpain-type cysteine protease DEK1 [Sesamum indicum]	IPR013320_Concanavalin A-like lectin/glucanase domain superfamily; IPR001300_Peptidase C2, calpain, catalytic domain; IPR022682_Peptidase C2, calpain, large subunit, domain III; IPR022683_Peptidase C2, calpain, domain III; IPR022684_Peptidase C2, calpain family; IPR038765_Papain-like cysteine peptidase superfamily; IPR036213_Calpain large subunit, domain III superfamily	AT1G55350.4	DEK1	calpain-type cysteine protease family	0.76	4.03	7.57	9.02	11.11	9.32	6.87	8.26	5.95	3.71	4.67	3.86	6.4	6.24	5.74	5.55	9.28	1.02	-0.231886	0.152999	0.310811	-0.472661	0.00387732	0.0212714	-0.240775	0.132134	0.285152	-0.385675	0.0170512	0.0728452	-0.715539	1.15766e-05	0.000233128	-0.832259	2.52467e-07	3.82432e-06
Rg_000218	casein kinase i isoform delta-like [Phtheirospermum japonicum]	IPR000719_Protein kinase domain; IPR011009_Protein kinase-like domain superfamily	AT4G28880.2	ckl3	casein kinase I-like 3	0.08	0.35	0.59	0.78	0.51	0.92	1.21	1.39	0.64	0.23	0.36	0.41	0.91	0.8	0.8	0.91	0.9	0.21	-0.444271	0.202801	0.377705	0.315697	0.361134	0.585125	0.759968	0.0212108	0.0756142	-0.290786	0.407041	0.675665	0.277753	0.413643	0.717555	0.0302739	0.928296	0.989224
Rg_000219	polyprotein [Broad bean wilt virus 2]	IPR027417_P-loop containing nucleoside triphosphate hydrolase; IPR000605_Helicase, superfamily 3, single-stranded DNA/RNA virus	AT1G09240.1	NAS3	nicotianamine synthase 3	0.13	0.74	1.79	4.27	3.04	3.19	0.72	0.57	0	1.55	0.61	1.36	2.72	2.52	1.46	5.53	2.92	0.94	0.621223	0.388454	0.582562	-2.25647	0.00210387	0.0130078	-2.87769	7.70997e-05	0.000805312	-0.613074	0.392526	0.662479	0.348325	0.626196	0.863541	-0.798683	0.264757	0.504198
Rg_000220	glutamate receptor 3.6 [Phtheirospermum japonicum]	IPR001828_Receptor, ligand binding region; IPR028082_Periplasmic binding protein-like I	AT3G51480.3	GLR3.6	glutamate receptor 3.6	0.13	0.28	0.78	0.22	0.09	0.2	0.79	1.01	0.14	0.08	0.08	0.11	0.4	0.29	0.18	0.25	0.27	0.07	-2.85451	5.28197e-07	1.1788e-05	-0.739553	0.171289	0.360285	2.11496	0.00017994	0.00163255	0.0250565	0.967771	1	0.679482	0.253406	0.557748	0.608823	0.297825	0.541505
Rg_000221	sister-chromatid cohesion protein 3 [Phtheirospermum japonicum]	.	AT2G47980.1	SCC3	sister-chromatid cohesion protein 3	0	0	0	0.31	0.04	0.03	0.02	0.05	0.06	0.6	0	0	1.28	0	0	2.84	0	0	16.593	NA	NA	15.4667	NA	NA	-1.12629	NA	NA	1.87676	NA	NA	3.01654	NA	NA	1.62287	NA	NA
Rg_000222	hypothetical protein TSUD_255820 [Trifolium subterraneum]	IPR012337_Ribonuclease H-like superfamily; IPR002156_Ribonuclease H domain; IPR000477_Reverse transcriptase domain; IPR026960_Reverse transcriptase zinc-binding domain	AT4G37760.1	SQE3	squalene epoxidase 3	0	0	0	1.32	2.73	2.09	0.25	0.59	1.25	0.53	1.37	0.22	2.21	2.52	1.3	2.92	3.34	0.2	8.62017	2.1262e-10	1.41141e-08	7.41548	4.95987e-08	1.27434e-06	-1.2047	0.0774837	0.195605	-0.733203	0.282295	0.54847	0.0321243	0.962261	1	-0.203636	0.763854	0.90897
Rg_000223	mediator of RNA polymerase II transcription subunit 13 [Sesamum indicum]	IPR041285_MID domain of medPIWI; IPR021643_Mediator complex, subunit Med13, N-terminal, metazoa/fungi; IPR009401_Mediator complex subunit Med13, C-terminal	AT1G55325.2	GCT	RNA polymerase II transcription mediator	0.9	2.6	7.11	16.16	15.22	15.06	10.42	11.08	8.06	3.66	4.84	4.34	10.91	10.7	9.51	7.36	11.55	1.26	0.622876	6.40978e-10	3.68453e-08	0.217952	0.0337434	0.113916	-0.404924	1.86188e-05	0.000239547	-0.970102	1.11088e-22	1.08667e-20	-1.02725	3.02366e-25	1.24579e-22	-0.724889	2.89354e-14	1.24152e-12
Rg_000224	phosphoglucan, water dikinase, chloroplastic [Sesamum indicum]	IPR002192_Pyruvate phosphate dikinase, PEP/pyruvate-binding	AT5G26570.1	PWD	chloroplastidic phosphoglucan, water dikinase (ATGWD3)	0.4	1.31	3.79	6.74	6	5.67	4.7	5.91	3.62	6.16	2.98	5.59	5.14	5.31	4.81	4.28	9.2	1.09	0.292153	0.329882	0.522857	0.158371	0.598596	0.790959	-0.133781	0.650192	0.806773	0.629589	0.0324075	0.120126	-0.102179	0.730032	0.920891	-0.40971	0.165411	0.369965
Rg_000225	protein PHOTOPERIOD-INDEPENDENT EARLY FLOWERING 1 isoform X1 [Sesamum indicum] XP_011075154.1 protein PHOTOPERIOD-INDEPENDENT EARLY FLOWERING 1 isoform X1 [Sesamum indicum] XP_011075156.1 protein PHOTOPERIOD-INDEPENDENT EARLY FLOWERING 1 isoform X1 [Sesamum indicum] XP_011075157.1 protein PHOTOPERIOD-INDEPENDENT EARLY FLOWERING 1 isoform X1 [Sesamum indicum]	IPR001650_Helicase, C-terminal; IPR014001_Helicase superfamily 1/2, ATP-binding domain; IPR000330_SNF2-related, N-terminal domain; IPR014012_Helicase/SANT-associated domain; IPR027417_P-loop containing nucleoside triphosphate hydrolase	AT3G12810.1	PIE1	SNF2 domain-containing protein / helicase domain-containing protein	0.76	3.23	6.13	8.52	9.31	8.81	9.22	8.94	6.2	3.17	5.44	3.65	9.79	7.92	8.33	5.47	9.03	1.34	-0.140584	0.435435	0.626992	-0.032597	0.856959	0.961792	0.107987	0.540968	0.721417	-0.259661	0.14635	0.360354	-0.454883	0.0113346	0.0690935	-0.186506	0.292146	0.535103
Rg_000226	U-box domain-containing protein 13 [Phtheirospermum japonicum]	IPR000008_C2 domain; IPR016024_Armadillo-type fold; IPR000225_Armadillo	AT2G22125.1	CSI1	binding protein	0.7	2.66	8.86	28.81	27.94	28.04	19.11	19.02	7.81	2.43	1.62	3.62	8.59	6.83	6.15	29.89	52.97	1.87	1.45933	0.000317239	0.00257692	0.774054	0.0563812	0.165931	-0.685273	0.0890973	0.216256	-2.54366	3.65351e-10	9.24455e-09	-0.146151	0.716882	0.914458	-2.13013	1.36086e-07	2.17241e-06
Rg_000227	hypothetical protein CTI12_AA091260 [Artemisia annua]	IPR013103_Reverse transcriptase, RNA-dependent DNA polymerase	AT4G23160.3	CRK8	cysteine-rich RECEPTOR-like kinase	0	0	0.03	4.71	4.43	5.22	0	0.62	1.18	0.59	0.71	0.53	2.23	2.43	1.97	3.02	5.68	0.54	7.72733	1.15961e-10	8.25318e-09	5.11918	2.11612e-05	0.000269341	-2.60814	0.00205008	0.0121236	-2.09062	0.0133981	0.0602673	-0.511032	0.543302	0.812	-1.26979	0.131103	0.31496
Rg_000228	uncharacterized protein LOC105180271 [Sesamum indicum]	IPR005135_Endonuclease/exonuclease/phosphatase; IPR000477_Reverse transcriptase domain; IPR036691_Endonuclease/exonuclease/phosphatase superfamily	AT3G49640.1	.	Aldolase-type TIM barrel family protein	0.55	1.69	4.66	2.64	2.76	3.18	19.03	13.36	5.44	1.9	1.63	1.56	4.24	2.52	2.59	1.54	2.11	0.41	-1.169	0.000877166	0.00590281	1.16378	0.000840796	0.00614179	2.33279	1.78689e-11	1.16378e-09	0.155766	0.658196	0.8658	-0.67864	0.0573684	0.221352	-0.0465147	0.894549	0.973807
Rg_000229	uncharacterized protein LOC105173126 [Sesamum indicum]	.	AT4G01290.2	.	chorismate synthase	0.08	0.26	0.6	1.31	1.34	1.14	0.83	0.81	1.03	0.55	0.69	0.99	1.49	1.74	1.31	0.94	1.96	0.27	0.479729	0.126065	0.270183	0.251284	0.43083	0.650895	-0.228445	0.433394	0.630785	0.116728	0.689759	0.884564	0.00372171	0.989884	1	0.114213	0.690948	0.866074
Rg_000230	protein CHROMATIN REMODELING 5 isoform X3 [Sesamum indicum]	IPR001650_Helicase, C-terminal; IPR000330_SNF2-related, N-terminal domain; IPR025260_Domain of unknown function DUF4208; IPR027417_P-loop containing nucleoside triphosphate hydrolase	AT2G13370.2	CHR5	chromatin remodeling 5	0.12	0.2	0.53	0.38	0.58	0.2	0.94	0.8	0.26	0.23	0.31	0	0.58	0.39	0.74	0.73	1	0.08	-1.29685	0.0685562	0.173462	-0.308046	0.663258	0.8359	0.988801	0.160056	0.325651	-0.256999	0.722668	0.903192	0.72297	0.308579	0.62038	0.447854	0.526533	0.752114
Rg_000231	LOW QUALITY PROTEIN: protein furry homolog-like [Sesamum indicum]	IPR025614_Cell morphogenesis protein N-terminal; IPR016024_Armadillo-type fold; IPR029473_Cell morphogenesis central region; IPR025481_Cell morphogenesis protein C-terminal	AT5G15680.1	.	ARM repeat superfamily protein	0.65	2.76	6.42	11.64	11.13	10.61	6.64	7.96	4.62	3.04	3.58	3.72	7.83	8.63	7.47	6.91	12.77	1.47	0.290038	0.0492074	0.136054	-0.273672	0.0676422	0.188829	-0.56371	8.71048e-05	0.000890695	-0.797492	5.01624e-08	9.17942e-07	-0.454006	0.00171894	0.0157364	-0.623057	1.41344e-05	0.000149956
Rg_000232	DNA polymerase epsilon catalytic subunit a [Phtheirospermum japonicum]	IPR012337_Ribonuclease H-like superfamily; IPR006134_DNA-directed DNA polymerase, family B, multifunctional domain; IPR013697_DNA polymerase epsilon, catalytic subunit A, C-terminal; IPR006172_DNA-directed DNA polymerase, family B; IPR006133_DNA-directed DNA polymerase, family B, exonuclease domain	AT1G08260.1	TIL1	DNA polymerase epsilon catalytic subunit	0.13	0.95	2.21	3.27	2.58	2.69	5.31	4.42	2.82	0.76	0.49	1.08	1.5	1.04	1.37	2.14	3.42	0.51	0.0143559	0.965935	0.999464	0.809247	0.0157817	0.0640453	0.794891	0.0149913	0.0581782	-0.942251	0.00525308	0.0280886	-0.185182	0.577207	0.833381	-1.26507	0.000165649	0.00133735
Rg_000233	polyprotein [Broad bean wilt virus 2]	IPR000199_Peptidase C3A/C3B, picornaviral; IPR009003_Peptidase S1, PA clan; IPR000605_Helicase, superfamily 3, single-stranded DNA/RNA virus; IPR027417_P-loop containing nucleoside triphosphate hydrolase	AT1G27600.2	IRX9-L	Nucleotide-diphospho-sugar transferases superfamily protein	0.27	0.84	1.19	3.35	2.06	3.27	4.15	6.41	1.31	0.96	0.93	1.22	1.93	1.34	1.98	2.5	3.03	0.37	0.168915	0.66144	0.811391	0.783976	0.0418789	0.133555	0.615061	0.102527	0.238629	-0.577513	0.131551	0.336019	-0.349008	0.360792	0.671926	-0.864612	0.0234743	0.0872382
Rg_000234	uncharacterized protein LOC101212255 isoform X1 [Cucumis sativus]	IPR012337_Ribonuclease H-like superfamily; IPR036875_Zinc finger, CCHC-type superfamily; IPR001584_Integrase, catalytic core; IPR025724_GAG-pre-integrase domain; IPR001878_Zinc finger, CCHC-type; IPR013103_Reverse transcriptase, RNA-dependent DNA polymerase	AT4G23160.3	CRK8	cysteine-rich RECEPTOR-like kinase	0.06	0.08	0	0.57	0.42	0.2	0	0.53	0	0.01	0.5	0.09	0	0	0	0.89	0.06	0.18	0.167705	0.925929	0.977402	-0.921389	0.611556	0.800272	-1.08909	0.545165	0.72471	-0.23014	0.89802	0.99241	0.809854	0.650971	0.878923	-7.24714	0.000699045	0.00468906
Rg_000235	ATP-dependent Lon protease [Vigna unguiculata]	IPR027417_P-loop containing nucleoside triphosphate hydrolase; IPR003959_ATPase, AAA-type, core	AT5G47040.1	LON2	lon protease 2	0.06	0.18	0.33	0.56	0.59	0.45	1.8	1.71	1.74	0.73	1.62	0.93	1.03	0.81	0.92	1.51	1.79	0.16	-0.103769	0.749492	0.875456	1.89032	1.03529e-09	3.88652e-08	1.99409	5.24125e-13	4.85889e-11	1.88593	1.63955e-11	4.9756e-10	1.22591	1.89564e-05	0.000359169	0.645391	0.0250699	0.091754
Rg_000236	DNA-directed RNA polymerase [Striga asiatica]	IPR007081_RNA polymerase Rpb1, domain 5; IPR007075_RNA polymerase Rpb1, domain 6; IPR000684_RNA polymerase II, heptapeptide repeat, eukaryotic; IPR007073_RNA polymerase Rpb1, domain 7; IPR007083_RNA polymerase Rpb1, domain 4	AT4G35800.1	NRPB1	RNA polymerase II large subunit	0	0.14	0.41	0.66	0	0.25	0	0	0.64	0.68	0.32	0	1.01	0	0	0	0	0	-0.345334	0.926511	0.977677	-0.222405	0.952643	1	0.122929	0.973776	1	1.17445	0.753366	0.919887	-6.44744	0.0997071	0.318864	-0.0322007	0.99313	1
Rg_000237	PREDICTED: phragmoplast orienting kinesin-1-like isoform X3 [Erythranthe guttata] XP_012850770.1 PREDICTED: phragmoplast orienting kinesin-1-like isoform X3 [Erythranthe guttata] XP_012850771.1 PREDICTED: phragmoplast orienting kinesin-1-like isoform X3 [Erythranthe guttata]	IPR001752_Kinesin motor domain; IPR027417_P-loop containing nucleoside triphosphate hydrolase	AT3G17360.2	POK1	phragmoplast orienting kinesin 1	0	0	0	0	0	0.2	0	0	0	0.22	0	0	0	0	0.13	0	0.18	0	3.68097	0.462427	0.65124	0	1	1	-4.67806	0.350372	0.55056	1.2044	0.804976	0.945874	-0.772176	0.874935	0.984094	-0.809522	0.868625	0.962017
Rg_000238	polyprotein [Broad bean wilt virus 2]	IPR009003_Peptidase S1, PA clan; IPR001205_RNA-directed RNA polymerase, C-terminal domain; IPR004004_Helicase/polymerase/peptidase polyprotein, Calicivirus-type; IPR000605_Helicase, superfamily 3, single-stranded DNA/RNA virus; IPR000199_Peptidase C3A/C3B, picornaviral	AT2G35940.2	BLH1	BEL1-like homeodomain 1	3	0.04	0.05	31.58	0.02	0.08	0.09	0.16	0.07	8.7	1.5	0.06	29	0.07	0.08	50.81	0.02	0.02	-0.272715	0.911825	0.969385	-6.60237	0.00776737	0.0367839	-6.32965	0.010701	0.0448085	-0.466063	0.849898	0.969108	0.803913	0.744074	0.928045	-0.243941	0.92109	0.985754
Rg_000239	hypothetical protein PHJA_002287100 [Phtheirospermum japonicum]	.	AT3G05680.2	EMB2016	embryo defective 2016	1.83	6.9	15.8	22.79	25.32	23.89	18.22	20.63	15.74	6.66	8.63	6.92	13.34	11.44	11.33	11.7	20.83	2.11	0.0548913	0.635328	0.791417	-0.0967365	0.406073	0.628298	-0.151628	0.181292	0.354983	-0.816933	1.67923e-12	5.77126e-11	-0.904483	6.56583e-15	8.05061e-13	-1.14953	1.92413e-23	2.21213e-21
Rg_000240	Armadillo repeat protein [Handroanthus impetiginosus]	IPR016024_Armadillo-type fold; IPR000008_C2 domain; IPR000225_Armadillo	AT2G22125.1	CSI1	binding protein	1.52	8.32	18.36	28.76	28.07	27.87	13.97	16.41	11.35	5.56	5.53	7.84	12.54	10.46	9.75	27.97	57.16	3.15	0.183413	0.468252	0.656604	-0.594338	0.0190922	0.0741239	-0.777752	0.00203983	0.0120764	-1.25939	6.57113e-07	9.74633e-06	0.013333	0.95779	1	-1.52381	1.67532e-09	3.70149e-08
Rg_000241	hypothetical protein C5H24_11650, partial [Xylella fastidiosa]	IPR005135_Endonuclease/exonuclease/phosphatase; IPR036691_Endonuclease/exonuclease/phosphatase superfamily; IPR000477_Reverse transcriptase domain	AT4G02390.2	PARP2	poly(ADP-ribose) polymerase	0.91	2.55	7.97	14.75	11.85	11.67	9.9	10.26	7.59	7.07	13.86	10.75	11.95	11.67	10	14.06	20.07	1.87	0.269047	0.112869	0.249309	0.0614262	0.718961	0.874223	-0.207621	0.210736	0.392878	0.594153	0.000322129	0.00257572	0.0377505	0.82047	0.961911	-0.327814	0.048168	0.151507
Rg_000242	hypothetical protein [Beta vulgaris subsp. vulgaris]	IPR026960_Reverse transcriptase zinc-binding domain; IPR000477_Reverse transcriptase domain; IPR036691_Endonuclease/exonuclease/phosphatase superfamily; IPR012337_Ribonuclease H-like superfamily; IPR002156_Ribonuclease H domain	AT5G11430.2	.	SPOC domain / Transcription elongation factor S-II protein	0.03	0.07	0.07	6.28	4.83	2.67	0.13	1.11	0.26	1.99	2.95	1.02	5.29	3.72	2.35	4.19	4.74	0.21	4.55576	4.22608e-11	3.39997e-09	1.54709	0.0277309	0.0982312	-3.00867	1.26667e-06	2.34037e-05	-0.312773	0.60747	0.833401	-0.639535	0.294373	0.604868	-0.420645	0.489114	0.724217
Rg_000243	polyprotein [Broad bean wilt virus 2]	IPR001205_RNA-directed RNA polymerase, C-terminal domain; IPR000605_Helicase, superfamily 3, single-stranded DNA/RNA virus; IPR000199_Peptidase C3A/C3B, picornaviral; IPR009003_Peptidase S1, PA clan	AT4G29090.1	.	Ribonuclease H-like superfamily protein	0.09	0.22	0.25	0.73	0.65	0.57	0.29	0.13	0.16	0	0.08	0.14	0.81	0.84	0.33	1.52	2.02	0.02	-0.148263	0.850653	0.934258	-1.64726	0.0416259	0.132964	-1.49899	0.0594105	0.162138	-2.2695	0.006296	0.0325545	0.648037	0.403148	0.709158	-0.130218	0.866819	0.961191
Rg_000244	nuclear receptor corepressor 1 [Phtheirospermum japonicum]	IPR001005_SANT/Myb domain; IPR009057_Homeobox-like domain superfamily	AT3G52250.1	.	Duplicated homeodomain-like superfamily protein	1.1	4.69	9.54	19.63	21.03	18.81	16.65	17.67	12.72	7.68	10.67	9.47	17.59	15.4	16.84	16.31	25.71	2.6	0.436047	4.80404e-05	0.000537705	0.342437	0.00152981	0.0100145	-0.0936102	0.361787	0.56201	-0.217234	0.0364563	0.131857	-0.26449	0.0110157	0.0675712	-0.402017	9.57619e-05	0.00082423
Rg_000245	hypothetical protein F511_00295 [Dorcoceras hygrometricum]	IPR013103_Reverse transcriptase, RNA-dependent DNA polymerase; IPR001584_Integrase, catalytic core; IPR001878_Zinc finger, CCHC-type; IPR012337_Ribonuclease H-like superfamily; IPR036875_Zinc finger, CCHC-type superfamily; IPR025724_GAG-pre-integrase domain	AT4G23160.3	CRK8	cysteine-rich RECEPTOR-like kinase	0.12	0.54	1.46	0	0.04	0	1.43	1.56	0	0.08	0	0.05	0.31	0.33	0.4	0.04	0.03	0	-6.96385	5.88059e-07	1.29375e-05	-0.750062	0.5284	0.736551	6.21379	8.13204e-06	0.000117707	2.57751	0.0745845	0.225321	0.426068	0.790554	0.949163	4.46789	0.00141649	0.00860739
Rg_000246	hypothetical protein [Beta vulgaris subsp. vulgaris]	IPR026960_Reverse transcriptase zinc-binding domain; IPR012337_Ribonuclease H-like superfamily; IPR036691_Endonuclease/exonuclease/phosphatase superfamily; IPR002156_Ribonuclease H domain; IPR000477_Reverse transcriptase domain	AT4G29090.1	.	Ribonuclease H-like superfamily protein	0.11	0.45	0.84	4.46	5.49	4.84	0.67	1.21	2.25	2.8	1.64	2.67	5.67	5.9	4.29	3.83	5.63	0.63	1.84291	2.4738e-05	0.000308831	0.350291	0.428072	0.64833	-1.49262	0.000434851	0.00340069	-0.128377	0.760322	0.92393	-0.376852	0.37156	0.681748	-0.0587583	0.888639	0.971264
Rg_000247	PREDICTED: uncharacterized protein LOC105974867 [Erythranthe guttata]	IPR000477_Reverse transcriptase domain; IPR036691_Endonuclease/exonuclease/phosphatase superfamily	AT3G24255.5	.	RNA-directed DNA polymerase (reverse transcriptase)-related family protein	0.02	0.04	0.05	1.35	1.13	1.14	0.01	0.16	0	0.7	0.61	0.55	1.13	1.23	1.08	0.85	1.56	0.28	3.20814	9.69416e-09	3.84188e-07	-0.92267	0.170392	0.358968	-4.13081	1.63392e-13	1.74508e-11	-0.0441629	0.916844	1	-0.0381577	0.92816	1	-0.213133	0.611825	0.814903
Rg_000248	uncharacterized protein LOC112092918 [Morus notabilis]	IPR000477_Reverse transcriptase domain	AT3G01410.1	.	Polynucleotidyl transferase, ribonuclease H-like superfamily protein	0.07	0.15	0.29	1.71	1.33	1.66	0.48	0.5	0.31	0.32	0.34	0.43	1.56	1.4	0.95	1.83	3.04	0.21	1.56293	2.82667e-07	6.9496e-06	-0.0762977	0.816434	0.936033	-1.63923	3.03634e-09	1.14157e-07	-1.21335	1.17013e-05	0.000133456	0.167541	0.507241	0.786378	-0.433225	0.0878746	0.236775
Rg_000249	DNA-directed RNA polymerase [Striga asiatica]	IPR007073_RNA polymerase Rpb1, domain 7; IPR007083_RNA polymerase Rpb1, domain 4; IPR000684_RNA polymerase II, heptapeptide repeat, eukaryotic; IPR007075_RNA polymerase Rpb1, domain 6; IPR007081_RNA polymerase Rpb1, domain 5	AT4G35800.1	NRPB1	RNA polymerase II large subunit	0.13	0.65	0.83	0.65	2.1	1.68	1.16	1.07	0.08	0	0.72	1.6	1.12	3	2.72	0.96	2.2	0.2	-0.140773	0.888302	0.955946	-0.972561	0.333621	0.556144	-0.831788	0.406008	0.605704	-0.12411	0.901209	0.993624	-0.307562	0.75861	0.934856	0.476104	0.633015	0.829725
Rg_000250	MND1-interacting protein 1 isoform X2 [Sesamum indicum]	IPR001841_Zinc finger, RING-type	AT1G32530.1	.	RING/U-box superfamily protein	0.45	1.97	4.32	5.56	4.87	5.52	3.29	3.59	2.02	2.03	1.25	1.51	3.01	2.35	2.4	5.53	8.78	0.84	-0.234617	0.308797	0.500602	-0.848346	0.000286226	0.00250383	-0.613729	0.0073228	0.0333564	-0.805351	0.000523806	0.00395628	0.0600638	0.792127	0.949912	-1.1909	2.64488e-07	3.99209e-06
Rg_000251	hypothetical protein F511_15782 [Dorcoceras hygrometricum]	.	AT4G23160.3	CRK8	cysteine-rich RECEPTOR-like kinase	0	0.01	0.04	0.07	0.13	0.03	0.31	0.35	0	0.02	0.08	0.02	0.08	0.02	0.1	0.13	0.29	0.02	0.810512	0.497273	0.681837	2.43278	0.0375965	0.123357	1.62227	0.10794	0.247505	-0.0860296	0.936448	1	0.904659	0.381884	0.690279	-0.425885	0.690292	0.865603
Rg_000252	hypothetical protein [Proteus mirabilis] MBB6642046.1 hypothetical protein [Proteus mirabilis]	IPR003182_RNA2 polyprotein; IPR003181_Large coat protein	AT3G48480.1	.	Cysteine proteinases superfamily protein	0.24	0.67	0.32	162.41	210.48	2.7	0.55	44.55	0.24	62.52	230.23	1.22	174.49	274.61	2.06	147.25	129.91	0.31	6.04327	0.000709766	0.00498323	3.04651	0.0878857	0.22766	-2.99676	0.0924991	0.221966	0.459755	0.796308	0.941695	-0.645396	0.717091	0.914573	0.125269	0.943929	0.996309
Rg_000253	5&apos;-3&apos; exoribonuclease 4 [Sesamum indicum]	IPR041412_Xrn1, helical domain; IPR001878_Zinc finger, CCHC-type; IPR036875_Zinc finger, CCHC-type superfamily; IPR004859_Putative 5-3 exonuclease	AT1G54490.1	XRN4	exoribonuclease 4	0.29	1.49	2.97	5.24	4.44	4.68	4.6	5.03	4.74	1.81	2.87	2.36	5.21	5	4.67	4.05	5.32	0.65	0.0932438	0.587269	0.754833	0.36341	0.0349384	0.116908	0.270166	0.0964826	0.228658	-0.151379	0.364226	0.635901	-0.310767	0.0640254	0.238238	-0.0898153	0.583045	0.794191
Rg_000254	pre-mRNA-processing protein 40A [Sesamum indicum] XP_011074335.1 pre-mRNA-processing protein 40A [Sesamum indicum] XP_011074336.1 pre-mRNA-processing protein 40A [Sesamum indicum]	IPR036517_FF domain superfamily; IPR001202_WW domain; IPR036020_WW domain superfamily; IPR002713_FF domain	AT1G44910.1	PRP40A	pre-mRNA-processing protein 40A	0.23	0.87	2.11	1.68	1.75	2.46	0.92	0.6	0.31	0.64	0.73	0.96	1.46	0.86	1.08	1.47	2.2	0.5	-0.596306	0.102436	0.232282	-2.07386	4.6563e-08	1.20434e-06	-1.47755	7.85427e-05	0.000818203	-0.452809	0.217673	0.466635	-0.0190064	0.95838	1	-0.963087	0.00873948	0.0394321
Rg_000255	phosphatidylinositol n-acetylglucosaminyltransferase subunit a [Phtheirospermum japonicum]	IPR013234_PIGA, GPI anchor biosynthesis; IPR001296_Glycosyl transferase, family 1	AT3G45100.3	SETH2	UDP-Glycosyltransferase superfamily protein	0.43	1.17	2.8	2.27	2.84	2.53	1.62	1.58	0.86	1.63	1.44	1.81	3.31	3.53	2.83	2.8	4.81	0.53	-0.781147	0.000225847	0.00194583	-1.47453	2.01095e-11	1.08376e-09	-0.693381	0.00126175	0.00817103	0.255418	0.224539	0.476097	0.26256	0.211682	0.504773	0.181763	0.380908	0.628814
Rg_000256	uncharacterized protein LOC101212255 isoform X1 [Cucumis sativus]	IPR012337_Ribonuclease H-like superfamily; IPR036875_Zinc finger, CCHC-type superfamily; IPR001584_Integrase, catalytic core; IPR025724_GAG-pre-integrase domain; IPR001878_Zinc finger, CCHC-type; IPR013103_Reverse transcriptase, RNA-dependent DNA polymerase	AT4G23160.3	CRK8	cysteine-rich RECEPTOR-like kinase	0	0	0.08	0.29	0.69	0.32	0.65	0.76	0.28	0.57	0.55	0.61	0.51	0.44	0.29	0.68	0.22	0.03	3.05887	0.000317109	0.00257647	3.63617	1.82016e-05	0.000236778	0.577304	0.346551	0.546544	1.33221	0.0290719	0.110535	-0.319424	0.613504	0.856911	-0.236275	0.703858	0.874566
Rg_000257	serine/threonine-protein kinase/endoribonuclease IRE1a-like isoform X1 [Sesamum indicum] XP_011096965.1 serine/threonine-protein kinase/endoribonuclease IRE1a-like isoform X1 [Sesamum indicum]	IPR011047_Quinoprotein alcohol dehydrogenase-like superfamily; IPR011009_Protein kinase-like domain superfamily	AT2G17520.1	IRE1A	Endoribonuclease/protein kinase IRE1-like protein	0.06	0.33	1.11	2.41	1.76	2.02	1.43	2.38	2.34	1.84	2.71	1.58	2.35	2.75	2.1	1.15	2.88	0.53	0.728896	0.0663051	0.16923	1.01383	0.0107426	0.0474285	0.284935	0.451572	0.646825	0.869249	0.0214098	0.0873262	0.021718	0.954668	1	0.0814607	0.829756	0.942965
Rg_000258	PREDICTED: uncharacterized protein LOC109154135 [Ipomoea nil]	IPR025312_Domain of unknown function DUF4216; IPR025452_Domain of unknown function DUF4218; IPR004242_Transposon, En/Spm-like	AT1G71460.1	.	Pentatricopeptide repeat (PPR-like) superfamily protein	0.35	1.26	3.25	0.51	0.26	0.3	5.29	4.44	0.07	0.62	0.31	0.48	0.76	1	0.88	0.33	0.54	0.14	-3.65293	3.77579e-06	6.33616e-05	-0.320519	0.680285	0.84768	3.33241	2.37075e-05	0.000294679	1.35557	0.0886734	0.255221	0.507053	0.528574	0.80161	1.1725	0.139899	0.329644
Rg_000259	phragmoplast orienting kinesin-1 [Phtheirospermum japonicum]	IPR001752_Kinesin motor domain; IPR027417_P-loop containing nucleoside triphosphate hydrolase	AT3G17360.2	POK1	phragmoplast orienting kinesin 1	0.03	0.1	0.1	0.78	0.44	0.29	0.94	0.5	0.22	0	0	0.16	0.42	0	0	0.19	0.12	0.04	0.89301	0.523719	0.704782	1.26315	0.367193	0.591387	0.370138	0.787551	0.899323	-2.27886	0.107716	0.292415	-1.48393	0.288187	0.598103	-2.11923	0.1297	0.312667
Rg_000260	polyprotein [Broad bean wilt virus 2]	IPR000199_Peptidase C3A/C3B, picornaviral; IPR000605_Helicase, superfamily 3, single-stranded DNA/RNA virus; IPR001205_RNA-directed RNA polymerase, C-terminal domain; IPR009003_Peptidase S1, PA clan; IPR004004_Helicase/polymerase/peptidase polyprotein, Calicivirus-type	AT2G33620.4	.	AT hook motif DNA-binding family protein	5.05	2.5	6.34	60.74	11.04	8.87	8.39	9.02	4.52	12.89	12.95	2.73	43.04	6.34	7.13	45.11	10.35	1.22	-0.0105369	0.991031	1	-1.59767	0.088472	0.228735	-1.58713	0.0904683	0.218536	-0.517538	0.58082	0.815769	-0.364617	0.697251	0.90485	-0.645722	0.490808	0.725467
Rg_000261	RNA helicase BRR2, DEAD-box superfamily [Handroanthus impetiginosus]	IPR011545_DEAD/DEAH box helicase domain; IPR027417_P-loop containing nucleoside triphosphate hydrolase; IPR036390_Winged helix DNA-binding domain superfamily; IPR041094_Brr2, N-terminal helicase PWI domain; IPR004179_Sec63 domain; IPR003593_AAA+ ATPase domain; IPR001650_Helicase, C-terminal; IPR014001_Helicase superfamily 1/2, ATP-binding domain	AT1G20960.1	emb1507	U5 small nuclear ribonucleoprotein helicase	0.17	1.8	3.19	6.55	6.19	7.01	3.06	2.8	2.41	2.49	4.08	2.85	5.7	4.52	4.18	3.17	6.1	0.78	0.554704	0.055391	0.14823	-0.446038	0.12795	0.296212	-1.00074	0.000462985	0.00358121	-0.204672	0.47183	0.73119	-0.722738	0.0116616	0.0706254	-0.613956	0.0307321	0.10746
Rg_000262	uncharacterized protein LOC105179348 isoform X4 [Sesamum indicum]	.	AT1G76740.1	.	hypothetical protein	0.2	0.83	2.55	6.08	3.71	4.54	1.82	1.72	2.4	0.41	0.54	0.98	1.49	0.91	1.57	2.17	4.82	0.32	0.631542	0.0923078	0.215401	-0.319578	0.398754	0.62139	-0.951119	0.0102241	0.0432271	-1.98713	1.7265e-07	2.87205e-06	-0.938513	0.0117391	0.0710297	-1.98089	1.32616e-07	2.12316e-06
Rg_000263	uncharacterized protein LOC105168755 isoform X1 [Sesamum indicum] XP_011087200.1 uncharacterized protein LOC105168755 isoform X1 [Sesamum indicum]	IPR038765_Papain-like cysteine peptidase superfamily; IPR006866_Domain of unknown function DUF627, N-terminal; IPR006865_Domain of unknown function DUF629	AT3G47910.1	.	Ubiquitin carboxyl-terminal hydrolase-related protein	0	0.05	0.17	0.49	0.29	0.53	0.49	0.39	0.17	0.25	0.09	0.56	0.72	0.46	0.36	0.23	0.74	0.11	1.33446	0.0618929	0.161071	1.23509	0.0863758	0.224778	-0.0993709	0.877321	0.950471	0.400045	0.533491	0.780999	0.0606119	0.925462	0.999055	0.071068	0.911607	0.981167
Rg_000264	hypothetical protein PHJA_000395400 [Phtheirospermum japonicum]	IPR015410_Domain of unknown function DUF1985	.	.	.	0	0	0.11	0.19	0.15	0.11	0	0.11	0.39	0	0	0.1	0	0	0.28	0	0.18	0.05	1.20865	0.610045	0.772056	1.86279	0.431535	0.651402	0.654142	0.776024	0.892333	-1.27226	0.586438	0.819821	-0.0551064	0.980983	1	-0.687215	0.766335	0.910017
Rg_000265	piezo-type mechanosensitive ion channel component1 [Striga asiatica]	IPR031334_Piezo non-specific cation channel, R-Ras-binding domain	AT2G48060.2	.	piezo-type mechanosensitive ion channel component	0	0.23	0.5	0.53	0.99	0.59	0.47	0.31	0.44	0.17	0.17	0.37	1.2	0.58	0.7	0.21	0.64	0	0.350473	0.641305	0.796016	-0.162923	0.830054	0.944822	-0.513395	0.486548	0.677052	-0.666969	0.370388	0.641775	-1.61132	0.0349106	0.156905	0.0468997	0.948943	0.998653
Rg_000266	F-box/kelch-repeat protein At1g57790-like [Sesamum indicum]	IPR036047_F-box-like domain superfamily; IPR001810_F-box domain	AT4G28510.1	PHB1	prohibitin 1	0.11	0.7	1.01	2.35	2.63	1.77	2.04	1.92	1.7	0.74	1.79	1.22	2.26	2.39	2.04	1.94	3.03	0.38	0.320895	0.232783	0.414972	0.326225	0.228842	0.436964	0.00532957	0.983287	1	0.000389345	0.998793	1	-0.113376	0.660879	0.884826	-0.160338	0.529191	0.754113
Rg_000267	Retrovirus-related Pol polyprotein from transposon TNT 1-94 [Vitis vinifera]	IPR001584_Integrase, catalytic core; IPR012337_Ribonuclease H-like superfamily	AT4G23160.3	CRK8	cysteine-rich RECEPTOR-like kinase	0.3	1.27	3.1	5.48	4.67	4.79	3.06	3.82	2.8	2.29	2.82	2.16	6.5	6.71	4.52	6.43	9.49	0.94	0.196925	0.232174	0.41422	-0.175365	0.297375	0.517322	-0.37229	0.0182205	0.0673873	-0.146942	0.35508	0.627055	0.320645	0.04005	0.172534	0.0962884	0.533974	0.757709
Rg_000268	nuclear-pore anchor [Sesamum indicum] XP_011086326.1 nuclear-pore anchor [Sesamum indicum]	IPR012929_Nucleoprotein TPR/MLP1	AT1G79280.1	NUA	nuclear pore anchor	0	0	0	3.01	2.28	2	0	0.56	1.31	0.71	0	0.97	1.39	1.42	0	0.69	1.34	0.44	8.78481	0.000137705	0.00129343	7.24672	0.00167834	0.0107954	-1.53809	0.438154	0.634919	-1.11403	0.574404	0.81088	-0.741492	0.708489	0.910069	-1.54803	0.435147	0.679153
Rg_000269	ferredoxin-dependent glutamate synthase, chloroplastic [Sesamum indicum]	IPR029055_Nucleophile aminohydrolases, N-terminal; IPR006982_Glutamate synthase, central-N; IPR017932_Glutamine amidotransferase type 2 domain; IPR002932_Glutamate synthase domain	AT5G04140.1	GLU1	glutamate synthase 1	0	0	0	0	0	0	0.75	1.23	1.21	0.71	0	0	0	0.13	0	0.17	0.45	0	0	1	1	19.9149	2.99726e-08	8.11139e-07	39.3026	7.73722e-28	6.69737e-25	37.938	5.16268e-26	6.55836e-24	36.2438	9.09623e-24	3.20952e-21	34.2814	3.32183e-21	3.07892e-19
Rg_000270	hypothetical protein PHJA_000738900 [Phtheirospermum japonicum]	IPR018849_Nucleolar 27S pre-rRNA processing, Urb2/Npa2, C-terminal	AT4G30150.1	.	Urb2/Npa2 family protein	0.45	1.65	2.72	3.61	3.93	3.98	6	6.79	2.81	1.2	1.69	1.45	3.12	2.12	2.89	1.88	2.77	0.5	-0.377831	0.145132	0.298989	0.258017	0.318777	0.540431	0.635847	0.0121154	0.0493247	-0.534745	0.0399291	0.141254	-0.797405	0.00237276	0.0204754	-0.657358	0.0107955	0.0468193
Rg_000271	polyprotein [Broad bean wilt virus 2]	IPR027417_P-loop containing nucleoside triphosphate hydrolase; IPR000605_Helicase, superfamily 3, single-stranded DNA/RNA virus	AT1G09240.1	NAS3	nicotianamine synthase 3	0.31	0	0.18	3.25	1.3	1.32	0.44	0.55	0.72	0.38	0.28	0.28	1.65	0.59	0.87	1.06	2.59	0.08	0.623629	0.534203	0.713135	-0.815549	0.418834	0.640025	-1.43918	0.150386	0.311835	-1.67344	0.0958472	0.269359	-0.788355	0.430415	0.731125	-1.04888	0.293481	0.536749
Rg_000272	Microtubule-associated protein [Handroanthus impetiginosus]	IPR034085_TOG domain; IPR016024_Armadillo-type fold	AT2G35630.1	MOR1	ARM repeat superfamily protein	0	0	0.23	3.39	3.08	4	0.27	0.65	0.47	0.39	1.58	1.36	2.5	3.68	2.14	2.67	4.24	0.69	4.54211	1.65844e-10	1.12802e-08	1.87559	0.0094573	0.0429655	-2.66652	1.72557e-05	0.000224336	-0.828608	0.174709	0.405189	-0.112954	0.852721	0.97535	-0.478999	0.430702	0.675039
Rg_000273	hypothetical protein [Beta vulgaris subsp. vulgaris]	IPR012337_Ribonuclease H-like superfamily; IPR026960_Reverse transcriptase zinc-binding domain; IPR000477_Reverse transcriptase domain; IPR002156_Ribonuclease H domain; IPR036691_Endonuclease/exonuclease/phosphatase superfamily	AT4G29090.1	.	Ribonuclease H-like superfamily protein	0	0	0.08	4.82	7.43	4.58	0.83	2.7	0	3.6	3.68	3.78	4.78	4.32	3.35	23.15	35.1	1.53	6.66927	2.2362e-09	1.08872e-07	4.47605	6.2954e-05	0.000685298	-2.19322	0.0192499	0.0702487	0.289807	0.756202	0.921555	1.72456	0.0644798	0.239351	-0.596405	0.523012	0.749683
Rg_000274	ABC transporter a family member 1 [Phtheirospermum japonicum]	IPR003439_ABC transporter-like; IPR003593_AAA+ ATPase domain; IPR027417_P-loop containing nucleoside triphosphate hydrolase	AT2G41700.1	ABCA1	ATP-binding cassette A1	0	0.1	0.35	0.64	0.85	0.68	0.26	0.86	0.75	0.39	0.6	0.37	1.05	0.95	0.93	1.49	1.22	0.14	1.08032	0.0437891	0.124915	1.13608	0.0349849	0.117018	0.0557588	0.909078	0.968511	0.17699	0.718707	0.900782	0.543073	0.265596	0.572609	0.274552	0.571579	0.785882
Rg_000275	hypothetical protein PHJA_000395400 [Phtheirospermum japonicum]	IPR015410_Domain of unknown function DUF1985	.	.	.	0.35	0.64	2.21	0.1	0.17	0	1.98	2.17	1.13	0	0.05	0.05	0.91	0.63	0.15	0.28	0.45	0.06	-5.13999	9.15455e-13	1.14493e-10	-0.637968	0.333261	0.555786	4.50202	3.55374e-10	1.70456e-08	-0.55851	0.516393	0.767506	1.77049	0.0175818	0.0959423	2.44147	0.000798859	0.00525962
Rg_000276	serine/threonine-protein kinase/endoribonuclease IRE1a-like isoform X1 [Sesamum indicum] XP_011096965.1 serine/threonine-protein kinase/endoribonuclease IRE1a-like isoform X1 [Sesamum indicum]	IPR000719_Protein kinase domain; IPR010513_KEN domain; IPR018997_PUB domain; IPR011009_Protein kinase-like domain superfamily	AT2G17520.1	IRE1A	Endoribonuclease/protein kinase IRE1-like protein	0	0	0	0	0	0	3.86	1.27	2.91	3.33	0.82	2.85	1.66	1.79	2.23	2.24	0	0.2	0	1	1	9.2477	3.61235e-08	9.56235e-07	10.6254	2.46055e-10	1.22932e-08	11.0793	4.11063e-11	1.18148e-09	9.08699	6.5314e-08	2.4003e-06	9.66673	8.62401e-09	1.69969e-07
Rg_000277	PREDICTED: retrovirus-related Pol polyprotein from transposon TNT 1-94 [Erythranthe guttata]	IPR001609_Myosin head, motor domain; IPR027417_P-loop containing nucleoside triphosphate hydrolase	AT1G08730.2	XIC	Myosin family protein with Dil domain-containing protein	0.41	0.94	5.27	0.47	0.31	0.74	2.88	2.6	1.17	0.15	0.23	0.11	0.42	0.48	0.2	0.4	0.54	0.04	-3.39219	5.65684e-14	9.59536e-12	-1.06423	0.0152172	0.0622455	2.32795	2.41375e-07	5.50768e-06	-0.803071	0.106448	0.290042	-0.589895	0.227754	0.525563	-0.653963	0.172306	0.380088
Rg_000278	Myosin class V heavy chain [Handroanthus impetiginosus]	IPR000048_IQ motif, EF-hand binding site; IPR027417_P-loop containing nucleoside triphosphate hydrolase; IPR002710_Dilute domain; IPR001609_Myosin head, motor domain	AT1G04160.1	XIB	myosin XI B	0.29	0.3	0.79	0.38	0.33	0.28	1.83	1.51	0.69	0.26	0.47	0.15	0.36	0.87	0.36	0.39	1.19	0.15	-2.461	7.643e-06	0.000113816	-0.208805	0.695626	0.858459	2.2522	3.43824e-05	0.000404599	0.683454	0.223891	0.475044	1.07624	0.0531307	0.21009	0.569797	0.305523	0.55006
Rg_000279	tata-binding protein-associated factor btaf1 [Phtheirospermum japonicum]	IPR001650_Helicase, C-terminal; IPR022707_Domain of unknown function DUF3535; IPR027417_P-loop containing nucleoside triphosphate hydrolase; IPR016024_Armadillo-type fold; IPR014001_Helicase superfamily 1/2, ATP-binding domain; IPR000330_SNF2-related, N-terminal domain	AT3G54280.1	RGD3	ROOT GROWTH DEFECTIVE 3	0.88	4.45	7.91	11.31	11.43	11.29	8.66	10.19	7.84	6.08	8.07	6.64	15.02	13.32	12.5	9.48	16.71	1.61	-0.163003	0.240105	0.423746	-0.26216	0.0608731	0.175228	-0.0991568	0.464812	0.657999	0.169677	0.212233	0.459386	-0.155469	0.256916	0.562043	0.111442	0.408787	0.65493
Rg_000280	serine/threonine-protein kinase/endoribonuclease IRE1a-like isoform X1 [Sesamum indicum] XP_011096965.1 serine/threonine-protein kinase/endoribonuclease IRE1a-like isoform X1 [Sesamum indicum]	IPR000719_Protein kinase domain; IPR010513_KEN domain; IPR018997_PUB domain; IPR011009_Protein kinase-like domain superfamily	AT2G17520.1	IRE1A	Endoribonuclease/protein kinase IRE1-like protein	0.13	0.19	0.81	3.18	3.33	2.57	0.33	2.27	0	1.48	5.25	2.37	6.34	4.14	5.21	3.14	5.42	0.45	1.43191	0.0867709	0.206352	-0.312765	0.710176	0.868513	-1.74468	0.0355041	0.11112	0.819295	0.32017	0.590565	0.0674598	0.934864	1	0.639629	0.437502	0.681112
Rg_000281	E3 ubiquitin-protein ligase PRT6 isoform X3 [Sesamum indicum]	IPR003126_Zinc finger, UBR-type; IPR036390_Winged helix DNA-binding domain superfamily	AT5G02310.1	PRT6	proteolysis 6	1.07	6.29	12.99	21.93	20.78	23.11	21.86	21.58	13.18	7.24	7.96	7.18	14.59	14.32	13.63	7.59	21.32	1.78	0.280238	0.239095	0.422483	0.291165	0.221775	0.428088	0.0109276	0.963088	0.99971	-0.663288	0.0051795	0.027759	-1.00809	2.27547e-05	0.000421388	-0.778252	0.00101123	0.00644276
Rg_000282	ATP-dependent helicase brm [Phtheirospermum japonicum]	IPR001650_Helicase, C-terminal; IPR036427_Bromodomain-like superfamily; IPR027417_P-loop containing nucleoside triphosphate hydrolase; IPR000330_SNF2-related, N-terminal domain; IPR014001_Helicase superfamily 1/2, ATP-binding domain; IPR001487_Bromodomain	AT2G46020.3	BRM	transcription regulatory protein SNF2	2	5.28	11.21	23.66	25.01	22.47	25.53	27.99	18.9	9.1	13.02	10.59	27.24	24.83	21.51	24.22	29.17	3.47	0.300591	0.0222202	0.0750716	0.566314	1.68612e-05	0.00022148	0.265723	0.0379981	0.116853	-0.244286	0.058956	0.18986	-0.130697	0.311913	0.623803	-0.103703	0.419117	0.66465
Rg_000283	thyroid adenoma-associated protein homolog [Sesamum indicum]	IPR019442_Domain of unknown function DUF2428, death-receptor-like; IPR016024_Armadillo-type fold	AT3G55160.3	.	thyroid adenoma-associated-like protein	0.52	1.69	3.17	4.91	4.55	4.86	2.64	3.7	2.06	1.74	1.36	1.88	5.61	5.22	4.35	2.99	5.57	0.61	-0.208838	0.298749	0.490302	-0.747001	0.000266017	0.00235208	-0.538163	0.00668901	0.0310943	-0.605824	0.00265871	0.0158463	-0.456359	0.0228537	0.115875	-0.067795	0.729066	0.889571
Rg_000284	Retrovirus-related Pol polyprotein from transposon RE1 [Vitis vinifera]	IPR025724_GAG-pre-integrase domain	AT4G23160.3	CRK8	cysteine-rich RECEPTOR-like kinase	0.15	0.57	1.55	5.99	4.75	6.84	4.97	3.92	2.64	2.61	0.91	2.36	2.62	3.92	4.1	4.95	6.9	0.98	1.52064	0.000149595	0.00138607	1.14474	0.00443581	0.0236621	-0.375897	0.333965	0.533818	-0.621579	0.111693	0.299855	-0.177648	0.648498	0.877406	-0.860273	0.0273787	0.0984336
Rg_000285	hypothetical protein [Capsicum annuum fabavirus]	IPR003181_Large coat protein	AT2G23180.1	CYP96A1	cytochrome P450, family 96, subfamily A, polypeptide 1	0.01	0	0.03	3.21	0.91	0.9	0.04	0.16	0	0.8	0.45	0.42	2.97	0.81	0.68	3.05	2.18	0.08	5.05085	2.46608e-06	4.39243e-05	0.600234	0.596981	0.789744	-4.45061	1.98842e-06	3.47672e-05	-0.587085	0.496493	0.751126	0.0473614	0.956127	1	-0.311488	0.717238	0.882452
Rg_000286	protein PHOTOPERIOD-INDEPENDENT EARLY FLOWERING 1 isoform X1 [Sesamum indicum] XP_011075154.1 protein PHOTOPERIOD-INDEPENDENT EARLY FLOWERING 1 isoform X1 [Sesamum indicum] XP_011075156.1 protein PHOTOPERIOD-INDEPENDENT EARLY FLOWERING 1 isoform X1 [Sesamum indicum] XP_011075157.1 protein PHOTOPERIOD-INDEPENDENT EARLY FLOWERING 1 isoform X1 [Sesamum indicum]	IPR001650_Helicase, C-terminal; IPR027417_P-loop containing nucleoside triphosphate hydrolase; IPR000330_SNF2-related, N-terminal domain; IPR014001_Helicase superfamily 1/2, ATP-binding domain	AT3G12810.1	PIE1	SNF2 domain-containing protein / helicase domain-containing protein	0.12	0.6	0.5	2.27	2.34	2.57	0	0.45	0	0.67	1.44	1.66	2.96	3.21	2.48	3.18	2.91	0.17	0.778064	0.34846	0.542013	-3.11267	0.000329971	0.0028148	-3.89074	5.82295e-06	8.86628e-05	-0.0782066	0.924268	1	-0.229316	0.780628	0.944999	0.114882	0.888749	0.971311
Rg_000287	PREDICTED: putative callose synthase 8 [Erythranthe guttata]	IPR003440_Glycosyl transferase, family 48	AT3G14570.1	GSL04	glucan synthase-like 4	0.1	0.47	1.47	2.39	1.92	2.3	4.47	4.94	1.19	0.25	0.18	0.35	0.62	0.37	0.12	0.83	1.27	0.31	0.370855	0.480065	0.666975	1.222	0.0197603	0.0761437	0.851146	0.0976016	0.230444	-2.15779	6.17225e-05	0.000598508	-0.903528	0.0842163	0.285753	-2.76642	3.07466e-07	4.57343e-06
Rg_000288	gag-pol polyprotein [Populus deltoides]	IPR013103_Reverse transcriptase, RNA-dependent DNA polymerase; IPR001584_Integrase, catalytic core; IPR012337_Ribonuclease H-like superfamily; IPR025724_GAG-pre-integrase domain	AT4G23160.3	CRK8	cysteine-rich RECEPTOR-like kinase	0.27	0.97	2.62	4.55	4.22	3.97	2.58	3.73	3.32	1.12	1.53	1.68	3.18	2.98	2.04	1.97	3.34	0.35	0.263331	0.230997	0.412876	0.130307	0.556975	0.760273	-0.133024	0.528689	0.711051	-0.672717	0.00194947	0.0121962	-1.00624	4.80814e-06	0.000108521	-0.794054	0.000209706	0.00164779
Rg_000289	hypothetical protein PHJA_001536200 [Phtheirospermum japonicum]	IPR008979_Galactose-binding-like domain superfamily; IPR016024_Armadillo-type fold	.	.	.	0.6	2.98	6.38	12.44	10.61	11.78	10.27	11.26	5.13	2.7	3.21	3.48	5.55	4.6	5.38	5.18	9.57	1.22	0.348056	0.102321	0.232099	0.173485	0.417318	0.638542	-0.174571	0.403888	0.60374	-0.996715	2.71617e-06	3.56798e-05	-0.875317	3.69989e-05	0.000638804	-1.30972	6.16742e-10	1.45591e-08
Rg_000290	nuclear-pore anchor [Sesamum indicum] XP_011086326.1 nuclear-pore anchor [Sesamum indicum]	IPR012929_Nucleoprotein TPR/MLP1	AT1G79280.1	NUA	nuclear pore anchor	0	0	0	2.78	3.13	3.25	0	0.47	0	1.13	2.14	3.04	2.17	1.39	3.03	3.83	0.51	0	9.11247	1.35561e-05	0.000185762	4.85058	0.0215064	0.0810791	-4.26189	0.0149468	0.0580508	0.328126	0.84981	0.96906	-1.1448	0.509343	0.788098	-0.613722	0.723263	0.886229
Rg_000291	serine/threonine-protein kinase/endoribonuclease IRE1a-like isoform X1 [Sesamum indicum] XP_011096965.1 serine/threonine-protein kinase/endoribonuclease IRE1a-like isoform X1 [Sesamum indicum]	IPR000719_Protein kinase domain; IPR011047_Quinoprotein alcohol dehydrogenase-like superfamily; IPR011009_Protein kinase-like domain superfamily	AT2G17520.1	IRE1A	Endoribonuclease/protein kinase IRE1-like protein	0	0	0	0	0	0	0	0	0	0	0	0	0	0	0	0	0	0	NA	NA	NA	NA	NA	NA	NA	NA	NA	NA	NA	NA	NA	NA	NA	NA	NA	NA
Rg_000292	protein MOR1 isoform X1 [Sesamum indicum]	IPR034085_TOG domain; IPR024395_CLASP N-terminal domain; IPR016024_Armadillo-type fold	AT2G35630.1	MOR1	ARM repeat superfamily protein	0.94	6.69	17.14	22.05	20.56	19.52	17.65	18.44	13.43	5.33	3.01	6.38	22.95	20.04	16.37	14.11	42.75	2.55	0.0393473	0.914685	0.971121	-0.0381962	0.917222	0.998187	-0.0775436	0.832342	0.925512	-1.14048	0.00191943	0.0120416	-0.0884503	0.809345	0.957604	-0.217356	0.552928	0.772183
Rg_000293	methyl-CpG-binding domain-containing protein 9 [Sesamum indicum]	IPR001965_Zinc finger, PHD-type; IPR001739_Methyl-CpG DNA binding; IPR036427_Bromodomain-like superfamily; IPR001487_Bromodomain; IPR011011_Zinc finger, FYVE/PHD-type; IPR028942_WHIM1 domain; IPR019787_Zinc finger, PHD-finger; IPR016177_DNA-binding domain superfamily; IPR028941_WHIM2 domain	AT3G01460.1	MBD9	methyl-CPG-binding domain 9	0.32	1.57	2.6	3.45	3.17	3.3	10.46	9.63	5.46	1.66	1.53	1.7	3.63	3.04	4.29	2.89	4.31	0.43	-0.413564	0.0669008	0.170341	1.17771	1.23413e-07	2.85813e-06	1.59127	1.74572e-13	1.84595e-11	-0.110196	0.622953	0.843425	-0.23646	0.293462	0.603707	0.00595324	0.978453	1
Rg_000294	polyprotein [Broad bean wilt virus 2]	IPR001205_RNA-directed RNA polymerase, C-terminal domain; IPR000605_Helicase, superfamily 3, single-stranded DNA/RNA virus; IPR000199_Peptidase C3A/C3B, picornaviral; IPR009003_Peptidase S1, PA clan	AT4G29090.1	.	Ribonuclease H-like superfamily protein	0	0	0	0.6	0.32	0.52	0	0.21	0	0.33	0.41	0.35	1.93	0.48	0.7	1.74	1.43	0.18	6.42219	6.07237e-06	9.40585e-05	3.83158	0.00870538	0.040246	-2.59061	0.00301063	0.0164466	0.485063	0.547183	0.791349	1.41408	0.0770591	0.269672	0.946417	0.236341	0.468657
Rg_000295	flowering time control protein FPA [Sesamum indicum] XP_011091636.1 flowering time control protein FPA [Sesamum indicum] XP_020553108.1 flowering time control protein FPA [Sesamum indicum] XP_020553109.1 flowering time control protein FPA [Sesamum indicum]	IPR035979_RNA-binding domain superfamily; IPR000504_RNA recognition motif domain; IPR012921_Spen paralogue and orthologue SPOC, C-terminal	AT2G43410.2	FPA	RNA binding protein	0.54	2.28	4.99	6.25	6.31	6.42	5.63	6.26	4.44	2.76	3.25	3.98	7.91	6.52	6.25	5.03	7.91	1.15	-0.212065	0.218775	0.397986	-0.186534	0.282609	0.501013	0.0255315	0.879136	0.951592	-0.0358832	0.832622	0.95993	-0.151783	0.373133	0.682843	-0.0309513	0.853593	0.954974
Rg_000296	serine/threonine-protein kinase/endoribonuclease IRE1a-like isoform X1 [Sesamum indicum] XP_011096965.1 serine/threonine-protein kinase/endoribonuclease IRE1a-like isoform X1 [Sesamum indicum]	IPR000719_Protein kinase domain; IPR010513_KEN domain; IPR018997_PUB domain; IPR011009_Protein kinase-like domain superfamily	AT2G17520.1	IRE1A	Endoribonuclease/protein kinase IRE1-like protein	0	0	0	2.55	2.62	1.57	0	0.76	1.4	1.01	1.17	0.92	1.28	1.15	1.95	2.32	2.53	0.49	8.6514	5.18083e-09	2.24244e-07	7.40342	6.05072e-07	1.18638e-05	-1.24799	0.167541	0.336021	-0.215341	0.811299	0.94923	0.0668386	0.940893	1	-0.743599	0.40972	0.655691
Rg_000297	uncharacterized protein At3g06530 [Sesamum indicum]	IPR012954_BP28, C-terminal domain; IPR016024_Armadillo-type fold; IPR022125_U3 small nucleolar RNA-associated protein 10, N-terminal	AT3G06530.5	.	ARM repeat superfamily protein	1.31	6.69	12.7	13.8	15.73	16.12	20.52	22.12	11.57	4.21	3.71	4.97	8.07	6.98	7.37	5.6	11.89	1.73	-0.332402	0.198646	0.37257	0.126997	0.623327	0.808856	0.459399	0.073873	0.189114	-0.92099	0.000385546	0.00302145	-0.930595	0.000338199	0.00419941	-1.18018	5.15446e-06	6.00099e-05
Rg_000298	pentatricopeptide repeat-containing protein At4g13650 isoform X1 [Sesamum indicum] XP_020552385.1 pentatricopeptide repeat-containing protein At4g13650 isoform X1 [Sesamum indicum] XP_020552386.1 pentatricopeptide repeat-containing protein At4g13650 isoform X1 [Sesamum indicum]	IPR002885_Pentatricopeptide repeat; IPR032867_DYW domain	AT4G13650.1	.	Pentatricopeptide repeat (PPR) superfamily protein	0.66	1.8	4.01	6.02	6	5.98	5.82	6.61	2.56	2.18	2.28	2.19	5.16	4.49	4.27	4.39	6.23	0.87	-0.1314	0.540889	0.718559	-0.194513	0.368176	0.592365	-0.0631139	0.764477	0.885609	-0.540085	0.0117572	0.0542845	-0.386282	0.0706789	0.254764	-0.521743	0.0137957	0.0572844
Rg_000299	PREDICTED: retrovirus-related Pol polyprotein from transposon TNT 1-94 [Erythranthe guttata]	IPR013103_Reverse transcriptase, RNA-dependent DNA polymerase	AT4G17690.1	.	Peroxidase superfamily protein	0.3	1.86	2.74	0.17	0.17	0.21	4.47	3.72	2.24	0.02	0.02	0.05	0.18	0.09	0.07	0.09	0.08	0.02	-4.6982	4.6914e-32	1.29552e-28	-0.217242	0.525885	0.734305	4.48096	8.97498e-30	1.04393e-26	-1.72485	0.00731739	0.036803	-1.08734	0.0450756	0.187717	-0.848795	0.0910102	0.242895
Rg_000300	hypothetical protein [Capsicum annuum fabavirus]	IPR003181_Large coat protein	AT2G23180.1	CYP96A1	cytochrome P450, family 96, subfamily A, polypeptide 1	0.03	0.13	0.23	2.97	2.24	2.28	0.29	0.43	0.22	1.02	0.63	0.67	4.96	1.48	1.16	3.52	2.13	0.2	2.6917	1.45528e-06	2.79467e-05	-0.0600766	0.917727	0.998371	-2.75178	2.30356e-07	5.27797e-06	-0.742704	0.147825	0.362882	-0.25472	0.618013	0.859044	-0.167568	0.741588	0.89663
Rg_000301	lysine-specific histone demethylase 1 homolog 3 [Sesamum indicum]	IPR002937_Amine oxidase; IPR036188_FAD/NAD(P)-binding domain superfamily; IPR007526_SWIRM domain; IPR009057_Homeobox-like domain superfamily	AT4G16310.3	LDL3	LSD1-like 3	0.35	1.24	2.7	4.38	5	4.53	2.84	3.22	2.88	2.08	2.28	2.57	3.87	4.05	3.92	3.04	5.17	0.67	0.152787	0.400803	0.594726	-0.228155	0.21831	0.42349	-0.380942	0.029586	0.0968872	-0.113077	0.520567	0.770587	-0.41404	0.0200185	0.105599	-0.377406	0.0305509	0.107043
Rg_000302	ferredoxin-dependent glutamate synthase, chloroplastic [Sesamum indicum]	IPR029055_Nucleophile aminohydrolases, N-terminal; IPR006982_Glutamate synthase, central-N; IPR017932_Glutamine amidotransferase type 2 domain; IPR002932_Glutamate synthase domain	AT5G04140.1	GLU1	glutamate synthase 1	0.03	0.1	0.16	0	0.06	0.06	0.82	0.12	0	0.03	0.35	1.21	0.93	0	0.43	0.85	0.31	0.03	-2.95315	0.0524034	0.142466	0.137304	0.92549	1	3.09045	0.0402671	0.122021	4.52345	0.00259169	0.015521	3.31828	0.0278465	0.133604	3.25317	0.0306538	0.107289
Rg_000303	nuclear-pore anchor [Sesamum indicum] XP_011086326.1 nuclear-pore anchor [Sesamum indicum]	IPR012929_Nucleoprotein TPR/MLP1	AT1G79280.1	NUA	nuclear pore anchor	2.06	7.31	16.79	17.24	16.55	16.84	20.94	21.57	13.34	6.99	6.82	6.48	12.66	11.71	12.41	9.19	21.82	2.62	-0.561525	0.00382734	0.0191706	-0.18758	0.33412	0.556681	0.373945	0.0524414	0.148114	-0.415638	0.0325536	0.120547	-0.350785	0.071236	0.256041	-0.605697	0.00178202	0.0104531
Rg_000304	uncharacterized protein LOC105178339 [Sesamum indicum]	IPR002156_Ribonuclease H domain; IPR012337_Ribonuclease H-like superfamily; IPR041588_Integrase zinc-binding domain; IPR041577_Reverse transcriptase/retrotransposon-derived protein, RNase H-like domain; IPR001584_Integrase, catalytic core; IPR000477_Reverse transcriptase domain	AT1G12760.1	.	Zinc finger, C3HC4 type (RING finger) family protein	0.39	2.55	8.18	0.53	0.38	0.64	4.59	4.13	0.16	0.16	0.18	0.33	0.86	0.49	0.64	0.59	0.98	0.04	-4.06529	1.93298e-08	6.99263e-07	-1.41835	0.0473118	0.145861	2.64694	0.000255637	0.00218712	-0.314043	0.673422	0.874961	-0.0685593	0.926392	0.999334	0.199782	0.785264	0.920023
Rg_000305	hypothetical protein CDL12_05267 [Handroanthus impetiginosus]	IPR000571_Zinc finger, CCCH-type	AT1G21580.7	.	Zinc finger C-x8-C-x5-C-x3-H type family protein	0	0.16	0	0.31	0	0.3	0.9	1.69	1.28	0.21	0.42	0	0.44	0	0.31	0	0.34	0	0.109504	0.957311	0.994258	3.05201	0.134164	0.305766	2.94251	0.143959	0.302797	0.916315	0.650331	0.860786	-1.33783	0.515712	0.792945	0.143558	0.943436	0.996072
Rg_000306	Retrovirus-related Pol polyprotein from transposon TNT 1-94 [Vitis vinifera]	IPR013103_Reverse transcriptase, RNA-dependent DNA polymerase; IPR001878_Zinc finger, CCHC-type; IPR036875_Zinc finger, CCHC-type superfamily; IPR001584_Integrase, catalytic core; IPR012337_Ribonuclease H-like superfamily; IPR025724_GAG-pre-integrase domain	AT4G23160.3	CRK8	cysteine-rich RECEPTOR-like kinase	0.21	0.42	1.02	1.61	1.67	1.78	1.45	1.32	0.36	0.36	0.58	0.64	0.73	0.88	0.96	1.26	1.96	0.14	-0.0472875	0.89608	0.960714	-0.549105	0.135588	0.30787	-0.501817	0.158252	0.323131	-0.811371	0.0257251	0.100616	-0.556495	0.12267	0.364683	-1.11668	0.00198031	0.0114184
Rg_000307	Deoxyribodipyrimidine photo-lyase [Handroanthus impetiginosus]	.	.	.	.	0.12	0.47	1.46	1.33	2.11	1.43	1.29	1.59	1.05	0.68	1.38	0.95	1.15	1.45	1.28	1.61	2.16	0.24	-0.132134	0.629124	0.786668	-0.211186	0.446253	0.66438	-0.079052	0.763766	0.885158	0.143903	0.586966	0.820245	-0.104338	0.696375	0.904618	-0.478478	0.0721226	0.205337
Rg_000308	PREDICTED: pentatricopeptide repeat-containing protein At2g17210 [Erythranthe guttata] XP_012851004.1 PREDICTED: pentatricopeptide repeat-containing protein At2g17210 [Erythranthe guttata]	IPR002885_Pentatricopeptide repeat	AT2G17210.1	.	Tetratricopeptide repeat (TPR)-like superfamily protein	0.12	0.96	1.82	1.15	2.49	1.18	6.79	5.9	2.57	0.5	0.7	0.73	0.59	0.56	0.73	1.04	1.48	0.17	-0.656881	0.0879583	0.208201	1.19812	0.00165675	0.0106858	1.855	7.39687e-07	1.46462e-05	-0.450654	0.245677	0.503827	-0.665488	0.0885931	0.295692	-1.50415	0.000141371	0.00116254
Rg_000309	transcription factor myb98 [Phtheirospermum japonicum]	.	AT2G36720.2	.	Acyl-CoA N-acyltransferase with RING/FYVE/PHD-type zinc finger domain-containing protein	0.06	0.3	0.26	0.92	1.29	1.36	1.83	2.55	0	0.07	0.11	0.06	0.05	0.13	0.11	0.31	0.16	0.06	0.785986	0.403797	0.597436	1.1572	0.21909	0.424428	0.371215	0.688455	0.835275	-2.98334	0.00214607	0.0132162	-2.23405	0.0190456	0.10186	-3.7396	0.00013757	0.00113466
Rg_000310	.	.	.	.	.	0	0	0	0.68	2.49	0.57	0.08	1.54	0	1.04	2.36	0.79	1.4	1.43	1.99	2.37	0.87	0.02	7.80678	3.79371e-06	6.36468e-05	6.62504	9.09658e-05	0.000933275	-1.18174	0.332132	0.531871	0.989018	0.414766	0.683038	-0.293432	0.809393	0.957605	0.222455	0.854512	0.955488
Rg_000311	uncharacterized protein LOC112097797 [Citrus clementina]	IPR041588_Integrase zinc-binding domain; IPR016197_Chromo-like domain superfamily; IPR012337_Ribonuclease H-like superfamily; IPR001584_Integrase, catalytic core	ATMG00860.1	ORF158	DNA/RNA polymerases superfamily protein	0.24	0.96	0.83	0.9	1.77	0.91	0.62	0.6	0	0.96	4.08	0.72	1.76	4.29	2.46	1.56	2.17	0.14	-1.01378	0.20072	0.375176	-2.45229	0.00227483	0.0138735	-1.43851	0.0725579	0.186708	1.46041	0.0639492	0.201426	0.11472	0.884973	0.987614	1.10736	0.159962	0.361757
Rg_000312	endoribonuclease Dicer homolog 1 [Sesamum indicum]	IPR027417_P-loop containing nucleoside triphosphate hydrolase; IPR014720_Double-stranded RNA-binding domain; IPR000999_Ribonuclease III domain; IPR003100_PAZ domain; IPR001650_Helicase, C-terminal; IPR036085_PAZ domain superfamily; IPR014001_Helicase superfamily 1/2, ATP-binding domain; IPR036389_Ribonuclease III, endonuclease domain superfamily; IPR005034_Dicer dimerisation domain; IPR011545_DEA…	AT1G01040.1	DCL1	dicer-like 1	1.05	5.29	8.84	6.24	8.65	5.85	6.71	7.25	2.83	3.43	5.63	4.86	8.28	7.37	6.32	5.7	9.48	1.15	-1.08215	1.63264e-05	0.000216339	-1.19169	2.28604e-06	3.82505e-05	-0.109536	0.662548	0.816363	0.290467	0.247162	0.505598	-0.126853	0.615147	0.857568	-0.0739175	0.768081	0.910975
Rg_000313	RNA-binding protein musashi/mRNA cleavage and polyadenylation factor I complex, subunit HRP1 [Handroanthus impetiginosus]	IPR035979_RNA-binding domain superfamily; IPR000504_RNA recognition motif domain	AT3G15010.2	.	RNA-binding (RRM/RBD/RNP motifs) family protein	0.16	0.42	0.89	1.17	0.91	0.73	0.36	0.54	0.1	0.44	0.41	0.43	0.93	1.14	0.59	0.45	0.9	0.17	-0.700821	0.0714561	0.178678	-1.97823	1.66142e-06	2.8928e-05	-1.27741	0.00157808	0.00979046	-0.215214	0.582646	0.817162	-0.472778	0.232013	0.531269	-0.213508	0.578836	0.791458
Rg_000314	Anaphase-promoting complex (APC), subunit 11 [Handroanthus impetiginosus]	IPR001841_Zinc finger, RING-type	AT5G01980.1	.	RING/U-box superfamily protein	0.04	0.32	0.43	1.52	1.42	0.82	1.46	1.81	1.95	1.39	2.61	1.27	1.66	1.84	2.15	1.1	1.25	0.14	0.673209	0.0691737	0.174532	1.44738	8.58723e-05	0.00088881	0.774174	0.0217445	0.0770256	1.35187	5.87686e-05	0.0005724	-0.40222	0.253097	0.557477	0.466181	0.168428	0.374249
Rg_000315	protein FORGETTER 1 isoform X1 [Sesamum indicum]	IPR019787_Zinc finger, PHD-finger; IPR001965_Zinc finger, PHD-type; IPR027417_P-loop containing nucleoside triphosphate hydrolase; IPR039187_Strawberry notch, AAA domain; IPR011011_Zinc finger, FYVE/PHD-type; IPR026937_Strawberry notch, helicase C domain	AT1G79350.1	EMB1135	RING/FYVE/PHD zinc finger superfamily protein	0.11	0.35	0.42	0.47	0.82	0.31	4.15	2.76	5.86	0.07	0.43	0.05	0	0.63	0.28	0.62	0.39	0	-0.952185	0.351656	0.5453	2.39119	0.0185738	0.0726012	3.34338	0.000943245	0.00643957	-0.771412	0.455094	0.717513	-0.831087	0.421783	0.724045	-0.919628	0.370889	0.61927
Rg_000316	succinate--CoA ligase [ADP-forming] subunit alpha-2, mitochondrial [Sesamum indicum]	IPR003781_CoA-binding; IPR036291_NAD(P)-binding domain superfamily	AT5G23250.3	.	Succinyl-CoA ligase, alpha subunit	0.16	0.76	1.89	2.06	2.18	1.76	1.64	1.82	1.36	0.57	1.18	0.83	1.44	1.37	1.14	1.34	2.32	0.28	-0.356557	0.0872379	0.207042	-0.418325	0.0487045	0.148845	-0.0617675	0.758689	0.882145	-0.360969	0.0856161	0.248962	-0.396697	0.0579014	0.222621	-0.754783	0.000287928	0.00216633
Rg_000317	translocase of chloroplast 159, chloroplastic, partial [Sesamum indicum]	IPR025558_Domain of unknown function DUF4283	AT4G02510.1	TOC159	translocon at the outer envelope membrane of chloroplasts 159	0.14	0.37	1.12	1.73	2.74	1.88	1.4	1.42	1.07	1.51	1.95	2.05	3.59	2.33	4.21	1.55	2.72	0.24	0.495677	0.0864542	0.205833	0.0220937	0.940243	1	-0.473584	0.08514	0.209354	0.669059	0.0131767	0.0594628	-0.398621	0.152072	0.415201	0.525848	0.0498359	0.155384
Rg_000318	chromatin modification-related protein EAF1 B-like isoform X3 [Sesamum indicum]	IPR014012_Helicase/SANT-associated domain	AT3G24880.2	.	Helicase/SANT-associated, DNA binding protein	0.59	2.48	5.82	9.65	8.37	9.18	4.92	5.43	5.16	3.81	4.23	4.03	7.91	7.4	6.56	5.11	9.75	1.25	0.145277	0.429259	0.62138	-0.39329	0.0345786	0.116078	-0.538567	0.0028366	0.0156905	-0.275623	0.127659	0.329104	-0.503645	0.00564514	0.0403649	-0.462344	0.010145	0.0445002
Rg_000319	protein MEI2-like 2 [Sesamum indicum] XP_011082914.1 protein MEI2-like 2 [Sesamum indicum]	IPR007201_Mei2/Mei2-like, C-terminal RNA recognition motif; IPR000504_RNA recognition motif domain; IPR035979_RNA-binding domain superfamily	AT1G29400.2	ML5	MEI2-like protein 5	1.39	4.23	11.47	8.14	6.4	8	11.5	10.9	6.24	2.44	3.95	2.75	8.21	6.84	7.28	6	8.44	0.98	-1.09874	2.40751e-11	2.08803e-09	-0.524488	0.00140094	0.00932296	0.574251	0.000418089	0.00329139	-0.433132	0.00979319	0.0467144	-0.353328	0.0347143	0.156279	-0.159391	0.332203	0.579113
Rg_000320	WD repeat-containing protein 11 [Phtheirospermum japonicum]	IPR036322_WD40-repeat-containing domain superfamily	AT3G33530.4	.	Transducin family protein / WD-40 repeat family protein	0.04	0.22	0.54	0.47	0.68	0.86	1.31	1.05	0.29	0.26	0.18	0.31	1.05	0.6	0.84	0.98	1.25	0.04	-0.0464049	0.930803	0.979376	0.514313	0.334934	0.55758	0.560718	0.273864	0.467066	-0.492794	0.353184	0.624819	0.0509557	0.922251	0.998248	0.127756	0.804123	0.93054
Rg_000321	Protein phosphatase 2A regulatory subunit A [Handroanthus impetiginosus]	IPR016024_Armadillo-type fold	AT5G16210.1	.	HEAT repeat-containing protein	0.13	0.13	0.3	0.75	0.55	0.45	1.18	0.74	0.29	0.12	0.38	0.23	0.8	0.59	0.45	0.33	0.68	0.04	-0.275566	0.598369	0.763	0.272331	0.601896	0.793322	0.547896	0.275863	0.469292	-0.418908	0.423043	0.689842	-0.682787	0.196301	0.483044	-0.0837678	0.86913	0.962275
Rg_000322	uncharacterized protein LOC105180166 [Sesamum indicum]	IPR000571_Zinc finger, CCCH-type	AT1G21580.2	.	Zinc finger C-x8-C-x5-C-x3-H type family protein	1.17	3.09	9.57	15.59	12.91	17.63	9.73	10.63	7.33	10.31	13.58	11.27	19.31	18.84	18.47	15.63	21.78	2.38	0.252586	0.101897	0.231395	-0.244618	0.116766	0.27799	-0.497204	0.00102969	0.00691057	0.488438	0.00116077	0.00788075	-0.0455359	0.763726	0.937097	0.147217	0.326748	0.573135
Rg_000323	transcription initiation factor TFIID subunit 1 isoform X2 [Sesamum indicum]	IPR036741_TAFII-230 TBP-binding domain superfamily; IPR009067_TAFII-230 TBP-binding; IPR022591_Transcription initiation factor TFIID subunit 1, domain of unknown function; IPR000626_Ubiquitin domain; IPR029071_Ubiquitin-like domain superfamily	AT1G32750.1	HAF01	HAC13 protein (HAC13)	0	0.35	0.35	0.33	0.45	0.58	1.06	0.9	0.65	0.48	0.57	0.52	1.83	3.69	0.97	0.72	1.13	0.29	-0.433237	0.507414	0.690866	0.717349	0.268422	0.484294	1.15059	0.0684305	0.179036	1.07923	0.0890694	0.255955	1.22276	0.0538002	0.211822	2.07806	0.00091915	0.00593358
Rg_000324	poly [ADP-ribose] polymerase 1 [Sesamum indicum]	IPR036420_BRCT domain superfamily; IPR001357_BRCT domain; IPR008893_WGR domain; IPR036930_WGR domain superfamily; IPR036616_Poly(ADP-ribose) polymerase, regulatory domain superfamily; IPR004102_Poly(ADP-ribose) polymerase, regulatory domain; IPR012317_Poly(ADP-ribose) polymerase, catalytic domain; IPR012982_PADR1 domain	AT2G31320.1	PARP1	poly(ADP-ribose) polymerase 2	0	0	0	1.58	0.84	1.14	0	0.26	0.07	0.65	0.35	0.8	0.74	0.99	0.59	0.79	1.7	0.26	7.69049	8.30434e-09	3.3566e-07	4.51075	0.000936872	0.00672433	-3.17974	4.23506e-06	6.69781e-05	-0.0227224	0.971568	1	-0.0167263	0.979082	1	-0.75457	0.237769	0.470592
Rg_000325	SAL1 phosphatase [Sesamum indicum]	IPR000760_Inositol monophosphatase-like; IPR006239_3(2),5 -bisphosphate nucleotidase HAL2	AT5G63980.1	SAL1	SAL1 phosphatase-like protein	0.06	0.31	0.81	1.21	1.25	1.19	4.2	2.73	2.37	1.09	0.76	1.02	0.57	0.59	0.78	1.49	1.8	0.3	0.193699	0.559362	0.732806	1.79361	3.78828e-08	9.98592e-07	1.59991	1.29935e-07	3.18177e-06	0.571447	0.0664216	0.207241	0.27401	0.383249	0.691447	-1.04127	0.00139043	0.00847179
Rg_000326	LOW QUALITY PROTEIN: protein TORNADO 1 [Sesamum indicum]	IPR027417_P-loop containing nucleoside triphosphate hydrolase; IPR032171_C-terminal of Roc (COR) domain; IPR001611_Leucine-rich repeat	AT5G55540.1	TRN1	tornado 1	1.54	4.67	9.57	11.14	7.35	10.58	13.2	10.6	8.41	3.11	2.95	3.25	5.75	2.79	7.5	4.24	7.43	1.99	-0.744315	0.0647372	0.166354	-0.340517	0.398127	0.620797	0.403798	0.315186	0.51373	-0.73186	0.0701034	0.215616	-0.440966	0.274636	0.582634	-0.988651	0.0142935	0.0589048
Rg_000327	PREDICTED: vacuolar protein sorting-associated protein 8 homolog isoform X2 [Erythranthe guttata]	IPR025941_Vacuolar protein sorting-associated protein 8, central domain	AT4G00800.2	SETH5	transducin family protein / WD-40 repeat family protein	0.74	5.82	10.45	15.63	14.87	10.15	12.44	10.85	15.48	4.81	5.39	4.53	10.19	10.84	10.45	3.22	13.36	1.13	-0.148579	0.694128	0.835457	0.106182	0.778738	0.912441	0.254761	0.498501	0.687339	-0.558132	0.139374	0.348863	-1.07838	0.00440387	0.0333142	-0.499793	0.184823	0.398381
Rg_000328	PREDICTED: FIP1[III]-like protein isoform X1 [Erythranthe guttata]	IPR019734_Tetratricopeptide repeat; IPR011990_Tetratricopeptide-like helical domain superfamily; IPR003107_HAT (Half-A-TPR) repeat	AT3G17040.2	HCF107	high chlorophyll fluorescent 107	0.31	1.25	1.65	1.8	2.24	1.9	1.37	1.12	1.88	5.97	5.83	5.87	7.68	7.14	8.31	4.51	7.47	0.59	-0.796498	0.00965709	0.039715	-0.934034	0.00266636	0.0157979	-0.137536	0.653114	0.809065	2.4709	1.1437e-16	6.32064e-15	1.14543	0.000146409	0.00208186	1.81438	1.1895e-09	2.68771e-08
Rg_000329	putative disease resistance protein rga3 [Phtheirospermum japonicum]	IPR041118_Rx, N-terminal; IPR002182_NB-ARC; IPR027417_P-loop containing nucleoside triphosphate hydrolase	AT2G27040.1	AGO4	Argonaute family protein	0.02	0.03	0.05	0.3	0.28	0.21	0.74	0.98	1.32	0.07	0.2	0.07	2.51	1.49	1.93	0.34	0.25	0.05	1.13323	0.0585095	0.154461	3.40201	4.37689e-09	1.43004e-07	2.26879	4.18934e-07	8.9693e-06	-0.356254	0.488148	0.744362	-0.0177025	0.971478	1	2.76399	5.2519e-10	1.25215e-08
Rg_000330	PREDICTED: uncharacterized protein LOC107059585 [Solanum tuberosum]	IPR007021_Domain of unknown function DUF659; IPR012337_Ribonuclease H-like superfamily	AT5G09420.1	TOC64-V	translocon at the outer membrane of chloroplasts 64-V	0.06	0	0.13	1.51	1.14	2.1	0.14	1.11	0.73	1.04	0.99	1.28	1.75	0.91	0.95	1.3	1.41	0.34	2.54553	0.0017008	0.0100814	1.512	0.0641441	0.181709	-1.03354	0.17662	0.348484	0.376519	0.620376	0.841955	-0.142907	0.851341	0.974897	-0.57578	0.449774	0.691385
Rg_000331	hypothetical protein PHJA_001131900 [Phtheirospermum japonicum]	.	AT5G07980.1	.	dentin sialophosphoprotein-like protein	0	0	0	0.21	0.16	0	0.2	0.17	0.35	0	0.24	0.23	0.22	0.67	0	0.41	0.87	0	4.37771	0.0394354	0.115375	5.75006	0.00662077	0.0325045	1.37234	0.440598	0.636961	1.21903	0.494467	0.749331	1.49059	0.402999	0.709067	1.15438	0.516707	0.744843
Rg_000332	PREDICTED: phosphatidylinositol 4-kinase alpha 1 [Erythranthe guttata]	IPR016024_Armadillo-type fold; IPR011009_Protein kinase-like domain superfamily; IPR001263_Phosphoinositide 3-kinase, accessory (PIK) domain; IPR000403_Phosphatidylinositol 3-/4-kinase, catalytic domain	AT1G49340.1	ATPI4K ALPHA	Phosphatidylinositol 3- and 4-kinase family protein	0.79	5.18	12.11	18.01	16.78	16.98	18.15	18.13	10.28	6.35	5.64	8.55	23.7	26.05	19.55	10.95	31.21	2.3	0.17761	0.555142	0.729777	0.249339	0.407812	0.629875	0.0717286	0.810505	0.912972	-0.423551	0.158036	0.379514	-0.172187	0.565765	0.826294	0.272988	0.361152	0.609625
Rg_000333	hypothetical protein CKAN_02080200 [Cinnamomum micranthum f. kanehirae]	IPR025724_GAG-pre-integrase domain; IPR001878_Zinc finger, CCHC-type; IPR012337_Ribonuclease H-like superfamily; IPR001584_Integrase, catalytic core; IPR013103_Reverse transcriptase, RNA-dependent DNA polymerase; IPR036875_Zinc finger, CCHC-type superfamily	AT4G23160.3	CRK8	cysteine-rich RECEPTOR-like kinase	0	0.1	0.05	0.86	0.54	1.13	0	0.33	0	0.46	0.64	0.29	1.27	1.56	0.89	0.72	1.43	0.25	2.53914	0.0106949	0.0429339	-0.303637	0.769509	0.907015	-2.84278	0.00307398	0.0167264	0.0176347	0.984698	1	0.345141	0.706925	0.909576	0.404967	0.658093	0.845464
Rg_000334	autophagy-related protein 2 [Sesamum indicum] XP_020551971.1 autophagy-related protein 2 [Sesamum indicum]	IPR026854_Vacuolar protein sorting-associated protein 13, N-terminal domain; IPR026885_Autophagy-related protein 2, CAD motif; IPR015412_Autophagy-related, C-terminal	AT3G19190.2	ATG2	autophagy 2	0.69	3.29	8.11	13.45	11.33	13.88	9.71	10.49	8.89	5.07	9.1	4.64	14.92	15.36	16.23	8.59	16.15	1.58	0.267793	0.217182	0.395955	0.118377	0.586664	0.782714	-0.149415	0.48441	0.675328	-0.182597	0.394543	0.66442	-0.412124	0.0554192	0.216297	0.12472	0.558471	0.776257
Rg_000335	uncharacterized protein LOC115713779 [Cannabis sativa]	IPR002156_Ribonuclease H domain; IPR036691_Endonuclease/exonuclease/phosphatase superfamily; IPR000477_Reverse transcriptase domain; IPR012337_Ribonuclease H-like superfamily; IPR026960_Reverse transcriptase zinc-binding domain; IPR005135_Endonuclease/exonuclease/phosphatase	AT4G29090.1	.	Ribonuclease H-like superfamily protein	0.22	1.02	1.48	3.26	2.25	2.24	2.45	2.68	2.04	1.84	3.96	2.5	3.98	4.56	4.12	2.93	4.64	0.59	-0.115138	0.621936	0.78105	0.0398023	0.865438	0.966925	0.15494	0.488171	0.678373	0.963243	1.35543e-05	0.000152811	0.31963	0.155728	0.420913	0.581074	0.00849987	0.0385498
Rg_000336	uncharacterized protein LOC111366761 [Olea europaea var. sylvestris]	IPR005162_Retrotransposon gag domain	AT2G44870.1	.	replicase polyprotein 1ab protein	0.08	0.21	0.26	0.84	0.94	0.98	0.34	0.87	0.31	0.67	1.56	1.16	2.32	2.42	1.63	2.74	2.88	0.25	0.497209	0.21688	0.39554	-0.145773	0.72505	0.878518	-0.642982	0.0927549	0.2224	1.14329	0.00185084	0.0116852	1.16848	0.00146877	0.0138276	1.04723	0.00409278	0.0209875
Rg_000337	protein tplate [Phtheirospermum japonicum]	IPR016024_Armadillo-type fold	AT3G01780.1	TPLATE	ARM repeat superfamily protein	0	0	0	0.72	0.09	0.81	0	0.21	0.55	0.21	0.43	0.2	0.17	0.29	0.63	0.71	1.56	0	6.54616	0.000203064	0.00178267	5.88707	0.000863134	0.0062764	-0.659095	0.618348	0.782535	-0.0912055	0.944979	1	0.126486	0.923694	0.998511	-0.636309	0.630243	0.827664
Rg_000338	plastidial pyruvate kinase 4, chloroplastic [Sesamum indicum] XP_020549230.1 plastidial pyruvate kinase 4, chloroplastic [Sesamum indicum]	IPR011037_Pyruvate kinase-like, insert domain superfamily; IPR015813_Pyruvate/Phosphoenolpyruvate kinase-like domain superfamily; IPR015793_Pyruvate kinase, barrel	AT5G53130.1	CNGC1	cyclic nucleotide gated channel 1	0	0.17	0.19	1.33	1.48	0.76	1.53	0.49	1	0.52	0.77	0.35	0.95	0.48	0.9	0.34	0.6	0.11	1.83352	0.00217396	0.0122518	1.90524	0.00149072	0.00981109	0.0717178	0.895353	0.960927	-0.238429	0.664919	0.869528	-1.38973	0.0141886	0.0819135	-0.748628	0.173831	0.382359
Rg_000339	probable helicase DDB_G0274399 [Sesamum indicum] XP_011083395.1 probable helicase DDB_G0274399 [Sesamum indicum] XP_020551124.1 probable helicase DDB_G0274399 [Sesamum indicum]	IPR027417_P-loop containing nucleoside triphosphate hydrolase; IPR041677_DNA2/NAM7 helicase, AAA domain; IPR041679_DNA2/NAM7 helicase-like, AAA domain	AT4G30100.1	.	P-loop containing nucleoside triphosphate hydrolases superfamily protein	1.11	4.28	11.22	19.49	18	19.36	13.28	15.75	11.21	5.11	5.51	5.5	11.15	8.91	8.52	13.73	20.07	2.53	0.329643	0.0155233	0.0573167	0.0767796	0.575701	0.774871	-0.252863	0.0567319	0.156979	-0.922122	1.04029e-11	3.24703e-10	-0.420056	0.00173213	0.0158309	-1.14723	1.55445e-17	9.76502e-16
Rg_000340	PREDICTED: uncharacterized protein LOC105974867 [Erythranthe guttata]	IPR036691_Endonuclease/exonuclease/phosphatase superfamily; IPR026960_Reverse transcriptase zinc-binding domain; IPR000477_Reverse transcriptase domain	ATMG01250.1	ORF102	RNA-directed DNA polymerase (reverse transcriptase)	0.01	0.17	0.22	1.29	1.2	1.2	0.17	0.48	0.54	0.69	0.75	0.73	1.42	1.89	1.26	1.47	2.25	0.21	1.69195	0.000132465	0.00125258	0.326109	0.479193	0.694559	-1.36584	0.000692627	0.00499473	0.136706	0.723976	0.903947	0.227908	0.555409	0.819719	0.165807	0.664792	0.849719
Rg_000341	PREDICTED: uncharacterized protein LOC109179592 [Ipomoea nil]	IPR004252_Probable transposase, Ptta/En/Spm, plant	AT3G27810.2	MYB21	myb domain protein 21	0	0.03	0.05	0.15	0	0	0.09	0.08	0.18	0	0	0	0	0.21	0.15	0.3	0.19	0	-0.37753	0.84341	0.930153	1.33882	0.477015	0.692472	1.71635	0.345923	0.545923	-3.53659	0.100204	0.277891	1.66291	0.363465	0.674297	1.2671	0.487824	0.723099
Rg_000342	60S ribosomal protein L22-2-like [Sesamum indicum]	.	AT3G05560.1	.	Ribosomal L22e protein family	0.06	0.3	0.4	0.41	0.3	0.24	11.58	17.6	10.02	0.13	0.13	0.14	0.22	0.27	0.66	0.48	0.75	0.05	-1.35976	0.00112641	0.00723249	4.25701	2.13694e-28	1.6392e-25	5.61677	7.89888e-49	4.90007e-45	-0.370336	0.415364	0.683583	0.492597	0.242179	0.544116	0.229598	0.581781	0.793358
Rg_000343	DExH-box ATP-dependent RNA helicase DExH14 [Sesamum indicum]	IPR004179_Sec63 domain; IPR001650_Helicase, C-terminal; IPR027417_P-loop containing nucleoside triphosphate hydrolase; IPR036390_Winged helix DNA-binding domain superfamily; IPR011545_DEAD/DEAH box helicase domain; IPR014001_Helicase superfamily 1/2, ATP-binding domain	AT5G61140.2	.	U5 small nuclear ribonucleoprotein helicase	0.35	1.29	1.02	0.4	0.32	0	0.35	1.62	0.86	0	0.27	0.58	0.59	1.6	1.54	0.7	0.47	0.18	-3.82733	0.000497241	0.00370923	-1.58579	0.144775	0.321329	2.24155	0.0415853	0.12506	1.11537	0.314391	0.584616	1.55852	0.158686	0.425662	2.29049	0.037243	0.124612
Rg_000344	hypothetical protein [Beta vulgaris subsp. vulgaris]	IPR005135_Endonuclease/exonuclease/phosphatase; IPR012337_Ribonuclease H-like superfamily; IPR026960_Reverse transcriptase zinc-binding domain; IPR000477_Reverse transcriptase domain; IPR036691_Endonuclease/exonuclease/phosphatase superfamily; IPR002156_Ribonuclease H domain	AT4G29090.1	.	Ribonuclease H-like superfamily protein	0.11	0.61	1.08	4.62	3.91	5.28	3.59	4.29	0.03	2.14	1.38	1.5	1.32	1.06	2.13	3.75	5.33	1.09	1.45478	0.0666268	0.169869	0.753933	0.34266	0.565978	-0.70085	0.372414	0.572749	-0.532885	0.497881	0.752148	0.0202295	0.97945	1	-1.74789	0.0265506	0.0960246
Rg_000345	hypothetical protein Saspl_027505 [Salvia splendens]	IPR011684_Protein Networked (NET), actin-binding (NAB) domain	AT1G03080.2	NET1D	kinase interacting (KIP1-like) family protein	0.21	0.65	1.79	0.53	0.34	0.18	2.45	1.75	0	0.07	0	0	0	0.25	0.11	0	0.53	0.1	-2.85334	0.0651967	0.16717	-0.704944	0.647553	0.825753	2.1484	0.164732	0.332186	-2.79774	0.0875899	0.252914	-0.108831	0.944371	1	-1.61346	0.305185	0.549673
Rg_000346	hypothetical protein [Beta vulgaris subsp. vulgaris]	IPR012337_Ribonuclease H-like superfamily; IPR000477_Reverse transcriptase domain; IPR002156_Ribonuclease H domain; IPR036691_Endonuclease/exonuclease/phosphatase superfamily; IPR026960_Reverse transcriptase zinc-binding domain	ATMG00310.1	ORF154	RNA-directed DNA polymerase (reverse transcriptase)-related family protein	0.03	0.06	0.27	2.54	3.22	3.14	0.61	1.94	0.37	1.41	1.67	1.65	1.7	1.61	1.86	1.22	1.93	0.28	3.21444	7.48436e-12	7.3499e-10	1.76558	0.000216136	0.00197112	-1.44886	0.000334138	0.0027352	-0.0290558	0.941717	1	-1.09505	0.00680652	0.0467202	-0.934123	0.0193499	0.0748941
Rg_000347	isoamylase 3, chloroplastic isoform X3 [Sesamum indicum]	IPR014756_Immunoglobulin E-set; IPR017853_Glycoside hydrolase superfamily; IPR004193_Glycoside hydrolase, family 13, N-terminal	AT4G09020.1	ISA3	isoamylase 3	0.08	0.23	0.74	0.13	0.53	0.55	0.34	0.14	0	0.58	0.67	0.67	1.13	2.03	0.85	1.36	1.77	0.05	-1.21316	0.100132	0.228455	-2.40584	0.00166466	0.0107294	-1.19268	0.116951	0.261875	1.51423	0.0375563	0.134924	1.1921	0.102822	0.325623	1.52747	0.0352573	0.119467
Rg_000348	PREDICTED: callose synthase 7-like [Erythranthe guttata]	IPR026899_1,3-beta-glucan synthase subunit FKS1-like, domain-1; IPR039431_Vta1/callose synthase, N-terminal	AT1G06490.1	CalS7	glucan synthase-like 7	0.13	0.64	0.57	0.43	0	0	0.28	0.12	0.67	0	0.42	0	0.94	0	0.13	0.34	0.44	0	-3.5249	0.0774376	0.189947	-1.68337	0.396754	0.619415	1.84153	0.356645	0.55692	0.767464	0.702343	0.891746	0.684255	0.733558	0.922777	1.20616	0.546527	0.767554
Rg_000349	1-phosphatidylinositol-3-phosphate 5-kinase FAB1B isoform X1 [Sesamum indicum] XP_020548406.1 1-phosphatidylinositol-3-phosphate 5-kinase FAB1B isoform X1 [Sesamum indicum]	IPR027409_GroEL-like apical domain superfamily; IPR002423_Chaperonin Cpn60/TCP-1 family; IPR002498_Phosphatidylinositol-4-phosphate 5-kinase, core; IPR000306_FYVE zinc finger; IPR011011_Zinc finger, FYVE/PHD-type	AT3G14270.2	FAB1B	phosphatidylinositol-4-phosphate 5-kinase family protein	0.51	2.59	4.51	9.59	10.01	9.63	16.09	14.63	8.25	3.02	5.51	4.78	6.63	7.8	8.22	4.64	12.09	1.14	0.422413	0.096064	0.221649	1.05908	2.96309e-05	0.000360972	0.636667	0.0103313	0.043574	-0.273846	0.274219	0.53894	-0.57222	0.0228871	0.115946	-0.506382	0.0426544	0.138157
Rg_000350	hypothetical protein CDL12_21358 [Handroanthus impetiginosus]	IPR028275_Clustered mitochondria protein, N-terminal; IPR019734_Tetratricopeptide repeat; IPR011990_Tetratricopeptide-like helical domain superfamily; IPR033646_CLU central domain	AT4G28080.1	.	Tetratricopeptide repeat (TPR)-like superfamily protein	0.27	1.09	2.31	2.79	2.71	2.5	3.04	3.09	1.58	42.15	14.6	31.8	47.59	46.32	46.16	16.28	19.68	2.29	-0.388938	0.277916	0.467595	-0.22123	0.538115	0.744606	0.167708	0.635109	0.795336	4.43694	3.75064e-37	9.8922e-35	2.44641	2.59475e-12	2.22954e-10	3.98918	2.3283e-30	5.26917e-28
Rg_000351	LOW QUALITY PROTEIN: lysine-specific demethylase 5B [Sesamum indicum]	IPR011011_Zinc finger, FYVE/PHD-type; IPR003347_JmjC domain; IPR036431_ARID DNA-binding domain superfamily; IPR001606_ARID DNA-binding domain; IPR004198_Zinc finger, C5HC2-type; IPR003349_JmjN domain; IPR019787_Zinc finger, PHD-finger; IPR001965_Zinc finger, PHD-type; IPR013637_Lysine-specific demethylase-like domain	AT1G63490.4	.	transcription factor jumonji (jmjC) domain-containing protein	0.8	3.11	6.42	9.7	10.09	9.41	13.97	14.67	7.78	4.47	6.58	5.27	11.68	10.74	9.76	7.68	12.53	1.55	-0.035313	0.808317	0.911067	0.503775	0.000527883	0.00415851	0.539088	0.000114813	0.00112549	0.0334015	0.81434	0.950898	-0.202767	0.156852	0.422847	-0.0111495	0.936874	0.993046
Rg_000352	hypothetical protein [Capsicum annuum fabavirus]	IPR002885_Pentatricopeptide repeat	AT2G28940.1	.	Protein kinase superfamily protein	0.09	0.54	0.86	2.49	0.84	1.07	0.56	0.35	0.17	0.58	0.35	0.39	2.09	0.81	0.56	1.16	0.97	0.21	0.0108867	0.983786	1	-1.73407	0.0017641	0.0112548	-1.74495	0.00132078	0.00847408	-0.743286	0.164835	0.389718	-0.487327	0.360463	0.671572	-0.495291	0.348576	0.596381
Rg_000353	polyprotein [Broad bean wilt virus 2]	IPR000605_Helicase, superfamily 3, single-stranded DNA/RNA virus; IPR000199_Peptidase C3A/C3B, picornaviral; IPR009003_Peptidase S1, PA clan	AT1G27900.1	.	RNA helicase family protein	0	0	0	0	0	0	0	0	0	0	0	0	0	0	0	0	0	0	NA	NA	NA	NA	NA	NA	NA	NA	NA	NA	NA	NA	NA	NA	NA	NA	NA	NA
Rg_000354	chromatin assembly factor 1 subunit [Catalpa bungei]	IPR028941_WHIM2 domain; IPR028942_WHIM1 domain	AT5G44180.1	RLT2	Homeodomain-like transcriptional regulator	0	0.06	0.58	0.75	0.84	0.45	0	0.27	0.13	0.6	0.37	0.37	1.14	0.87	0.6	1.22	0.75	0.12	0.741079	0.383898	0.577889	-1.31771	0.136026	0.308506	-2.05879	0.0160649	0.0613254	0.35225	0.669084	0.872263	0.261945	0.75097	0.931101	0.208246	0.799955	0.928215
Rg_000355	uncharacterized protein LOC112167661 [Rosa chinensis]	.	.	.	.	0.62	1.48	6.26	13.84	13.95	15.69	7.7	9.93	2.57	0.49	0.88	0.47	5.23	4.08	4.17	5.57	7.72	1.18	0.99536	0.00311072	0.0162853	0.0546838	0.871482	0.970871	-0.940676	0.00479307	0.0239274	-3.70417	4.64886e-26	5.91573e-24	-1.28786	0.000122002	0.00177788	-1.84857	3.47015e-08	6.20532e-07
Rg_000356	coronatine-insensitive protein 1 [Sesamum indicum]	0	AT2G39940.1	COI1	RNI-like superfamily protein	0.13	0.54	0.94	2.34	1.77	1.77	1.39	1.28	0.9	1.08	1.18	0.93	1.13	1.14	1.22	0.99	1.82	0.26	0.289995	0.199346	0.373487	-0.180713	0.439452	0.658607	-0.470708	0.0267524	0.0899828	0.0291378	0.890467	0.989303	-0.662804	0.00262235	0.0222132	-0.875318	5.48273e-05	0.000501634
Rg_000357	hypothetical protein [Beta vulgaris subsp. vulgaris]	IPR000477_Reverse transcriptase domain; IPR036691_Endonuclease/exonuclease/phosphatase superfamily; IPR012337_Ribonuclease H-like superfamily; IPR026960_Reverse transcriptase zinc-binding domain; IPR002156_Ribonuclease H domain	ATMG00310.1	ORF154	RNA-directed DNA polymerase (reverse transcriptase)-related family protein	0.29	0.56	2.83	10.7	12.41	16.08	8.77	10.39	0.08	1.84	1.77	3.24	3.33	3.45	3.4	11.41	18.8	1.71	2.04071	0.0103455	0.0418568	1.10525	0.165261	0.351731	-0.935459	0.237346	0.425241	-1.62674	0.0401851	0.141896	-0.200152	0.800362	0.95327	-2.10315	0.00797993	0.0365966
Rg_000358	putative GTP diphosphokinase RSH1, chloroplastic [Sesamum indicum]	IPR003607_HD/PDEase domain; IPR004095_TGS; IPR007685_RelA/SpoT; IPR012676_TGS-like	AT4G02260.2	RSH1	RELA/SPOT homolog 1	0.14	1.03	1.91	0.23	0.11	0.08	7.13	6.13	5.23	0.21	0.06	0.04	0.09	0.22	0.21	0	0.09	0.03	-4.29815	2.37126e-11	2.06453e-09	1.44244	0.0154005	0.0628409	5.74059	2.00044e-19	5.86288e-17	0.485123	0.484418	0.741299	-1.28451	0.107189	0.334685	0.263603	0.699735	0.871692
Rg_000359	protein MEI2-like 2 [Sesamum indicum] XP_011082914.1 protein MEI2-like 2 [Sesamum indicum]	IPR007201_Mei2/Mei2-like, C-terminal RNA recognition motif; IPR000504_RNA recognition motif domain; IPR035979_RNA-binding domain superfamily	AT1G29400.2	ML5	MEI2-like protein 5	0.22	0.58	0.99	2.58	2.65	2.64	0.12	0.38	0.53	1.45	0.84	1.19	2.62	1.92	3.44	1.78	2.65	0.53	0.391996	0.400291	0.594196	-2.23993	4.91601e-06	7.53522e-05	-2.63193	4.27693e-08	1.19066e-06	-0.241748	0.598738	0.828231	-0.225343	0.623962	0.862457	-0.121313	0.790574	0.923084
Rg_000360	hypothetical protein [Beta vulgaris subsp. vulgaris]	IPR000477_Reverse transcriptase domain; IPR036691_Endonuclease/exonuclease/phosphatase superfamily; IPR026960_Reverse transcriptase zinc-binding domain; IPR002156_Ribonuclease H domain	ATMG00310.1	ORF154	RNA-directed DNA polymerase (reverse transcriptase)-related family protein	0.46	1.43	4.54	0.21	2.93	3.71	6.88	5.85	3.07	0.39	2.47	0.73	1.81	3.99	1.34	0.55	5.08	0.24	-1.27444	0.114577	0.252018	0.0901377	0.911023	0.994659	1.36458	0.0904095	0.218454	-0.210099	0.795154	0.941172	-0.391685	0.628761	0.86515	-0.143722	0.858781	0.95734
Rg_000361	brefeldin A-inhibited guanine nucleotide-exchange protein 2 [Sesamum indicum]	IPR016024_Armadillo-type fold; IPR015403_Sec7, C-terminal; IPR032817_Mon2, C-terminal	AT3G60860.1	.	SEC7-like guanine nucleotide exchange family protein	0.36	1.32	2.31	4.21	3.9	4.61	6.08	6.98	3.83	1.2	1.37	1.16	3.97	3.95	3.8	4.07	5.85	0.72	0.0754516	0.653181	0.804845	0.707989	2.2665e-05	0.000286056	0.632538	4.7929e-05	0.000536289	-0.887327	1.88437e-07	3.10896e-06	-0.0528657	0.74331	0.927632	-0.267434	0.0937303	0.248135
Rg_000362	DExH-box ATP-dependent RNA helicase DExH14 [Sesamum indicum]	IPR011545_DEAD/DEAH box helicase domain; IPR004179_Sec63 domain; IPR014001_Helicase superfamily 1/2, ATP-binding domain; IPR001650_Helicase, C-terminal; IPR036390_Winged helix DNA-binding domain superfamily; IPR027417_P-loop containing nucleoside triphosphate hydrolase; IPR003593_AAA+ ATPase domain; IPR014756_Immunoglobulin E-set	AT5G61140.2	.	U5 small nuclear ribonucleoprotein helicase	0.72	3.24	10.08	20.93	18.4	20.69	20.62	21.74	13.64	7.4	6.4	7.09	11.39	10.1	10.64	7.28	17.35	2.19	0.763926	0.0028986	0.015398	0.897755	0.000469712	0.00377635	0.133829	0.597001	0.765897	-0.610952	0.0163034	0.0703446	-0.895595	0.000444066	0.00524233	-1.04786	3.76224e-05	0.000359619
Rg_000363	myosin-16 isoform X2 [Sesamum indicum]	0	AT1G24460.1	TNO1	TGN-related, localized SYP41 interacting protein	0.65	2.39	5.42	13.1	11.57	12.06	8.87	10.37	6.47	4.01	4.65	5.72	10.23	10.75	9.61	10.01	18.32	1.44	0.597706	0.000127335	0.00121102	0.32111	0.0413084	0.132194	-0.276597	0.0647592	0.17227	-0.457126	0.00256928	0.0154132	-0.226949	0.132613	0.382784	-0.406456	0.0066662	0.0314917
Rg_000364	hypothetical protein CDL12_05267 [Handroanthus impetiginosus]	IPR000571_Zinc finger, CCCH-type	AT1G21580.3	.	Zinc finger C-x8-C-x5-C-x3-H type family protein	0.05	0.31	0.33	0.75	0.38	0.39	1.11	1.46	0.49	0.38	0.72	0.29	0.57	1.18	0.78	0.26	0.82	0.03	-0.534354	0.29061	0.481507	0.703239	0.158172	0.341391	1.23759	0.0101114	0.0428455	0.755035	0.123082	0.320849	-0.454842	0.374281	0.683822	0.651103	0.179542	0.390788
Rg_000365	putative callose synthase 8 [Sesamum indicum]	IPR003440_Glycosyl transferase, family 48; IPR026899_1,3-beta-glucan synthase subunit FKS1-like, domain-1; IPR039431_Vta1/callose synthase, N-terminal	AT3G14570.1	GSL04	glucan synthase-like 4	0.62	1.56	4.72	14.99	18.39	17.43	20.34	21.02	13.71	2.23	3.08	3.03	8.46	5.76	6.23	7.18	7.91	1.28	1.37674	3.3543e-11	2.76008e-09	1.72213	1.1274e-16	1.4741e-14	0.345399	0.0833949	0.206203	-1.73662	2.83114e-17	1.67266e-15	-1.34405	4.34679e-11	2.96952e-09	-1.47658	3.0271e-13	1.14297e-11
Rg_000366	Retrovirus-related Pol polyprotein from transposon RE1 [Vitis vinifera]	IPR025724_GAG-pre-integrase domain	AT4G23160.3	CRK8	cysteine-rich RECEPTOR-like kinase	0	0.45	0.13	0.92	0.99	0.62	0.15	0.2	0.08	0.62	0.31	0.55	1.75	0.58	0.21	1.42	0.56	0.21	0.466383	0.601305	0.765203	-1.88405	0.0416237	0.132964	-2.35043	0.0095508	0.0410355	0.181397	0.836185	0.961811	0.267994	0.759977	0.935381	-0.192384	0.826257	0.94142
Rg_000367	PREDICTED: callose synthase 9 [Erythranthe guttata] XP_012828940.1 PREDICTED: callose synthase 9 [Erythranthe guttata] XP_012828941.1 PREDICTED: callose synthase 9 [Erythranthe guttata]	IPR026899_1,3-beta-glucan synthase subunit FKS1-like, domain-1	AT3G07160.2	GSL10	glucan synthase-like 10	1.26	6.69	17.14	28.14	27.32	25.35	20.97	22.72	17.74	10.17	14.72	10.66	26.16	24.69	30.63	11.67	36.43	3.17	0.330369	0.202437	0.377231	0.191239	0.461122	0.678123	-0.13913	0.589214	0.759743	-0.30709	0.234107	0.489285	-0.540051	0.036635	0.162226	-0.125256	0.62677	0.825405
Rg_000368	sister-chromatid cohesion protein 3 [Phtheirospermum japonicum]	.	AT2G47980.1	SCC3	sister-chromatid cohesion protein 3	0	0.02	0.08	1.53	0.18	0.07	0.03	0.1	0.1	2.06	0	0.03	4.59	0.11	0	8.86	0.19	0.02	3.18502	NA	NA	0.546605	NA	NA	-2.63842	NA	NA	1.41634	NA	NA	2.45417	NA	NA	1.25153	NA	NA
Rg_000369	callose synthase 1 [Sesamum indicum] XP_011086997.1 callose synthase 1 [Sesamum indicum] XP_011087003.1 callose synthase 1 [Sesamum indicum] XP_020548943.1 callose synthase 1 [Sesamum indicum]	IPR039431_Vta1/callose synthase, N-terminal; IPR003440_Glycosyl transferase, family 48; IPR026899_1,3-beta-glucan synthase subunit FKS1-like, domain-1	AT2G31960.2	GSL03	glucan synthase-like 3	3.03	13.02	29.09	72.56	69.1	66.58	31.44	40.27	33.74	23.74	24.67	28.82	39.72	35.34	33.17	23.85	63.11	9.06	0.739528	0.0039654	0.0197202	0.024266	0.924772	1	-0.715262	0.00519826	0.0255038	-0.529557	0.038613	0.137697	-0.773733	0.0025271	0.0215292	-1.09256	1.9826e-05	0.000203479
Rg_000370	hypothetical protein CKAN_02080200 [Cinnamomum micranthum f. kanehirae]	IPR001878_Zinc finger, CCHC-type; IPR025724_GAG-pre-integrase domain; IPR012337_Ribonuclease H-like superfamily; IPR001584_Integrase, catalytic core; IPR036875_Zinc finger, CCHC-type superfamily; IPR013103_Reverse transcriptase, RNA-dependent DNA polymerase	AT4G23160.3	CRK8	cysteine-rich RECEPTOR-like kinase	0.02	0.06	0.17	2.33	2.44	2.53	0.52	0.5	0.78	1.16	1.84	2.71	3.9	3.69	4.67	3.74	5.66	0.48	3.40816	8.15815e-15	1.65165e-12	1.6714	0.000219587	0.00199942	-1.73676	4.44911e-07	9.43594e-06	0.520193	0.112153	0.300646	0.522655	0.110734	0.341537	0.609056	0.0610954	0.181331
Rg_000371	THO complex subunit 2 [Sesamum indicum]	IPR021418_THO complex, subunitTHOC2, C-terminal; IPR021726_THO complex, subunitTHOC2, N-terminal; IPR032302_THO complex subunit 2, N-terminal domain	AT1G24706.7	THO2	THO2	0.02	0.16	0.3	0.57	0.42	0.65	0.7	0.37	0.53	0.48	0.12	0.46	1.22	0.65	0.57	0.47	0.75	0.03	0.329307	0.574635	0.74508	0.566482	0.335792	0.55839	0.237175	0.668755	0.820811	0.316933	0.570247	0.807947	-0.480912	0.400733	0.707181	0.378514	0.492757	0.726835
Rg_000372	putative RNA-directed DNA polymerase [Rosa chinensis]	IPR002156_Ribonuclease H domain; IPR026960_Reverse transcriptase zinc-binding domain; IPR000477_Reverse transcriptase domain; IPR036691_Endonuclease/exonuclease/phosphatase superfamily; IPR012337_Ribonuclease H-like superfamily	.	.	.	0.64	2.6	7.58	7.52	10.67	8.52	8.23	9.99	5.89	2	2.26	2	3.7	4.05	4	3.95	4.02	0.63	-0.0717968	0.749528	0.875479	0.00243192	0.991394	1	0.0742287	0.737414	0.869149	-1.21146	9.91244e-08	1.72166e-06	-1.37259	1.8864e-09	9.67768e-08	-1.33181	3.40495e-09	7.13201e-08
Rg_000373	callose synthase 1 [Sesamum indicum] XP_011086997.1 callose synthase 1 [Sesamum indicum] XP_011087003.1 callose synthase 1 [Sesamum indicum] XP_020548943.1 callose synthase 1 [Sesamum indicum]	IPR026899_1,3-beta-glucan synthase subunit FKS1-like, domain-1; IPR003440_Glycosyl transferase, family 48	AT2G31960.2	GSL03	glucan synthase-like 3	0	0	0	0.77	0.42	0.88	2.28	0.01	0.06	0	0.96	0	0	0.32	0.59	4.87	1.42	0.03	6.89423	0.0070803	0.0311042	7.27525	0.00448622	0.0238518	0.381027	0.867031	0.945109	-0.426118	0.851702	0.970093	1.52765	0.501851	0.783068	-1.28926	0.571943	0.786119
Rg_000374	hypothetical protein [Proteus mirabilis] MBB6642046.1 hypothetical protein [Proteus mirabilis]	IPR003181_Large coat protein	AT5G62130.4	.	Per1-like family protein	0.13	0.6	0.58	3.1	4.02	3.22	0.66	1.84	0.56	1.07	1.77	1.1	3.25	3.75	3.49	1.54	2.51	0.67	1.21236	0.00637486	0.0286207	-0.365039	0.420003	0.640975	-1.57739	0.000299512	0.00249931	-0.538656	0.212668	0.459919	-0.519348	0.229763	0.528453	-0.12792	0.76543	0.909666
Rg_000375	polyprotein [Broad bean wilt virus 2]	IPR000199_Peptidase C3A/C3B, picornaviral; IPR000605_Helicase, superfamily 3, single-stranded DNA/RNA virus; IPR027417_P-loop containing nucleoside triphosphate hydrolase; IPR009003_Peptidase S1, PA clan; IPR001205_RNA-directed RNA polymerase, C-terminal domain	AT5G62760.3	.	P-loop containing nucleoside triphosphate hydrolases superfamily protein	1.01	1.9	12.52	13.71	17.65	13.66	100.63	45.71	12.37	5.49	8.07	6.39	16.4	14.96	13.48	7.88	16.91	2.5	0.270149	0.595944	0.761187	2.26627	8.53145e-06	0.000121265	1.99612	8.38654e-05	0.000862304	-0.303853	0.550181	0.793426	-0.388027	0.4456	0.74275	-0.159592	0.753451	0.903119
Rg_000376	rust resistance kinase Lr10-like [Sesamum indicum]	IPR000719_Protein kinase domain; IPR011009_Protein kinase-like domain superfamily; IPR025287_Wall-associated receptor kinase, galacturonan-binding domain	AT1G66920.2	.	Protein kinase superfamily protein	0.16	0.55	0.81	1.5	1.85	1.11	1.94	2.37	4.97	0.85	2.96	0.47	0.56	0.79	0.61	0.21	0.42	0.28	-0.157925	0.827249	0.921521	1.26934	0.0786009	0.210496	1.42727	0.0457424	0.134088	0.740635	0.301401	0.570071	-1.07128	0.141066	0.396605	-1.31433	0.0697635	0.200354
Rg_000377	Glucan 1,3-beta-glucosidase [Handroanthus impetiginosus]	IPR002885_Pentatricopeptide repeat	AT5G20940.1	.	Glycosyl hydrolase family protein	0.11	0.16	0.76	1.22	0.97	1.25	0.45	0.15	0	0.36	0.63	0.4	1.71	1.09	1.11	2.05	2.24	0.23	0.231935	0.676774	0.823013	-2.09583	0.000406539	0.0033448	-2.32776	5.44924e-05	0.000598926	-0.465945	0.396234	0.66618	0.52629	0.330962	0.643844	0.0182091	0.973147	1
Rg_000378	Glycosyltransferase [Handroanthus impetiginosus]	.	AT2G39630.1	.	Nucleotide-diphospho-sugar transferases superfamily protein	0.13	0.58	1.12	2.04	1.48	1.86	1.41	1.32	0.84	0.59	0.65	0.73	1.47	1.33	1.3	1.59	1.8	0.23	0.0172146	0.936755	0.98248	-0.333566	0.13694	0.309945	-0.35078	0.0887968	0.21578	-0.551376	0.0108735	0.0509118	-0.367198	0.0821293	0.28084	-0.539165	0.00937764	0.0417651
Rg_000379	hypothetical protein PHJA_001131900 [Phtheirospermum japonicum]	.	AT5G07980.1	.	dentin sialophosphoprotein-like protein	0.8	3.05	6.74	10.54	10.49	10.55	5.35	7.03	5.81	4.01	5.28	4.58	10.02	9.33	8.87	6.51	10.48	1.09	0.0606976	0.632027	0.788869	-0.480761	0.000210152	0.00192239	-0.541458	1.15432e-05	0.000158659	-0.304705	0.0142093	0.0631014	-0.64655	2.85736e-07	9.02142e-06	-0.311534	0.0107567	0.0466753
Rg_000380	uncharacterized protein LOC105180271 [Sesamum indicum]	IPR036691_Endonuclease/exonuclease/phosphatase superfamily; IPR000477_Reverse transcriptase domain; IPR005135_Endonuclease/exonuclease/phosphatase	AT3G24255.5	.	RNA-directed DNA polymerase (reverse transcriptase)-related family protein	0.21	0.42	0.98	0.01	0.02	0.03	6.69	5.22	0.14	0.07	0.15	0.04	0.08	0.02	0.03	0.21	0.15	0.01	-6.19518	1.98391e-09	9.81114e-08	1.28787	0.129533	0.298624	7.48305	3.12849e-13	3.08874e-11	2.6328	0.0141173	0.0627863	2.47519	0.0215828	0.111388	0.549818	0.635469	0.831393
Rg_000381	PREDICTED: phragmoplast orienting kinesin-1-like isoform X3 [Erythranthe guttata] XP_012850770.1 PREDICTED: phragmoplast orienting kinesin-1-like isoform X3 [Erythranthe guttata] XP_012850771.1 PREDICTED: phragmoplast orienting kinesin-1-like isoform X3 [Erythranthe guttata]	IPR001752_Kinesin motor domain; IPR027417_P-loop containing nucleoside triphosphate hydrolase	AT3G17360.2	POK1	phragmoplast orienting kinesin 1	0.17	0.5	2.65	6.68	4.38	4.51	3.65	3.51	2.69	1.43	0.56	1.11	0.56	0.51	1.12	1.89	4.28	0.55	0.961916	0.0342162	0.103901	0.566325	0.213941	0.417905	-0.395592	0.37554	0.575808	-1.35776	0.00263967	0.015758	-0.924789	0.0397298	0.171506	-2.91679	2.36684e-10	6.02117e-09
Rg_000382	callose synthase 1 [Sesamum indicum] XP_011086997.1 callose synthase 1 [Sesamum indicum] XP_011087003.1 callose synthase 1 [Sesamum indicum] XP_020548943.1 callose synthase 1 [Sesamum indicum]	IPR039431_Vta1/callose synthase, N-terminal; IPR026899_1,3-beta-glucan synthase subunit FKS1-like, domain-1; IPR003440_Glycosyl transferase, family 48	AT2G31960.2	GSL03	glucan synthase-like 3	0.74	3.63	14.49	34.12	31.37	36.69	13.31	14.24	18.03	8.55	8.79	7.55	7.42	9.34	14.72	5.36	24.58	2.21	1.23575	0.00477399	0.0228759	0.373147	0.394607	0.617617	-0.862599	0.0481126	0.139167	-1.13932	0.00910984	0.0440418	-1.53524	0.000447171	0.00526961	-1.82437	2.9851e-05	0.000292516
Rg_000383	putative 1-phosphatidylinositol-3-phosphate 5-kinase FAB1C isoform X2 [Sesamum indicum]	IPR027409_GroEL-like apical domain superfamily; IPR011011_Zinc finger, FYVE/PHD-type; IPR002423_Chaperonin Cpn60/TCP-1 family	AT1G71010.1	FAB1C	FORMS APLOID AND BINUCLEATE CELLS 1C	0.27	0	0.85	1.04	0.44	1.12	0	0.63	1.09	0.15	0.34	0	2.38	1.3	0.92	1.47	1.26	0.11	-0.787093	0.572929	0.743749	-0.992718	0.477697	0.693079	-0.205625	0.882826	0.95392	-1.57066	0.264721	0.527467	0.208824	0.881039	0.986383	0.652612	0.639289	0.833691
Rg_000384	chromatin assembly factor 1 subunit [Catalpa bungei]	IPR028941_WHIM2 domain; IPR018501_DDT domain; IPR007759_HB1/Asxl, restriction endonuclease HTH domain; IPR028942_WHIM1 domain; IPR001356_Homeobox domain; IPR009057_Homeobox-like domain superfamily	AT5G44180.1	RLT2	Homeodomain-like transcriptional regulator	1.18	5.66	11.45	17.16	18.69	16.81	15.04	16.99	9.45	7	6.99	8.3	12.89	11.53	11.98	9.67	19.43	1.95	0.0465332	0.796062	0.90394	-0.075424	0.676353	0.84519	-0.121957	0.492507	0.682169	-0.339879	0.0572609	0.185711	-0.607808	0.000710267	0.00769474	-0.681852	0.000132594	0.00109829
Rg_000385	putative RNA-directed DNA polymerase [Rosa chinensis]	IPR036691_Endonuclease/exonuclease/phosphatase superfamily; IPR026960_Reverse transcriptase zinc-binding domain; IPR012337_Ribonuclease H-like superfamily; IPR000477_Reverse transcriptase domain; IPR002156_Ribonuclease H domain	AT3G24255.5	.	RNA-directed DNA polymerase (reverse transcriptase)-related family protein	0.61	2.03	7.57	28.97	28.33	22.97	6.78	14.93	16.16	11.91	7.7	4.8	10.16	8.88	5.58	21.61	25.78	1.52	1.63463	0.000278634	0.00231397	0.861332	0.0557386	0.164466	-0.773296	0.083668	0.206731	-0.775608	0.0829274	0.243555	-0.732249	0.101656	0.323051	-1.86109	3.2432e-05	0.000314926
Rg_000386	plastidial pyruvate kinase 4, chloroplastic [Sesamum indicum] XP_020549230.1 plastidial pyruvate kinase 4, chloroplastic [Sesamum indicum]	IPR011037_Pyruvate kinase-like, insert domain superfamily; IPR015813_Pyruvate/Phosphoenolpyruvate kinase-like domain superfamily; IPR015793_Pyruvate kinase, barrel	AT3G49160.3	.	pyruvate kinase family protein	0.03	0.47	0.56	0.59	1	2.11	0.83	1.23	0	1.47	0.3	1.1	0.72	1.04	1.36	1.3	2.71	0.01	0.411936	0.69721	0.837684	-0.361817	0.733549	0.884403	-0.773754	0.462308	0.656051	0.575683	0.583166	0.817582	-0.244108	0.816572	0.960127	-0.400101	0.703305	0.874205
Rg_000387	serine/threonine-protein kinase/endoribonuclease IRE1a-like isoform X1 [Sesamum indicum] XP_011096965.1 serine/threonine-protein kinase/endoribonuclease IRE1a-like isoform X1 [Sesamum indicum]	IPR000719_Protein kinase domain; IPR010513_KEN domain; IPR018997_PUB domain; IPR011009_Protein kinase-like domain superfamily	AT2G17520.1	IRE1A	Endoribonuclease/protein kinase IRE1-like protein	0.47	1.37	2.78	0.38	0.54	2.57	0	0	0	1.05	0.92	0.8	0	2.31	0.01	0.01	1.52	0.47	-1.98844	0.286893	0.477787	-10.6653	1.33452e-06	2.38621e-05	-8.67685	8.40211e-05	0.000863432	0.515392	0.782617	0.935393	0.112906	0.951828	1	-0.773558	0.679061	0.858457
Rg_000388	E3 ubiquitin-protein ligase UPL3 [Striga asiatica]	IPR000569_HECT domain; IPR035983_HECT, E3 ligase catalytic domain; IPR000225_Armadillo; IPR016024_Armadillo-type fold	AT4G38600.1	KAK	HECT ubiquitin protein ligase family protein KAK	0	0	0.15	0.21	1.06	1	1.43	1.61	0.76	0.28	0.75	0.37	0	0.5	0.84	0.14	1.19	0.15	3.11175	0.0102063	0.0414675	4.01586	0.000904807	0.00653333	0.904107	0.411119	0.610565	0.0949743	0.931486	1	-0.341583	0.757905	0.934338	-0.890839	0.42135	0.666659
Rg_000389	Microtubule-associated protein essential for anaphase spindle elongation [Handroanthus impetiginosus]	0	AT1G27920.1	MAP65-8	microtubule-associated protein 65-8	0.04	0.15	0.45	0.29	0.44	0.6	0.15	0.83	0.14	0.06	0.19	0.12	0.29	0.54	0.44	4.1	3.87	0.23	-0.383966	0.530643	0.71025	-0.49146	0.427375	0.647701	-0.107494	0.857771	0.939941	-1.03069	0.103855	0.285051	2.59434	8.13779e-06	0.000171369	-0.21846	0.715742	0.881529
Rg_000390	uncharacterized protein LOC105164707 [Sesamum indicum]	IPR011990_Tetratricopeptide-like helical domain superfamily	AT4G32820.1	.	Tetratricopeptide repeat (TPR)-like superfamily protein	0.44	1.92	3.13	7.55	7.82	8.23	5.45	5.8	4.92	2.84	3.18	3.44	7.15	5.61	5.35	6.14	9.45	1.06	0.514945	0.0023166	0.0128914	0.223047	0.192329	0.389208	-0.291899	0.0699833	0.182004	-0.431455	0.00836521	0.0411093	-0.322778	0.0477959	0.195504	-0.543075	0.000781994	0.00516292
Rg_000391	ERD (early-responsive to dehydration stress)family protein [Striga asiatica]	IPR032880_Calcium permeable stress-gated cation channel 1, N-terminal transmembrane domain	AT1G11960.2	.	ERD (early-responsive to dehydration stress) family protein	0	0	0	0	0.07	0	0.63	0.3	0.13	0	0	0	0	0	0	0	0	0	1.9859	0.588833	0.756003	6.09584	0.0928882	0.236763	4.10994	0.238171	0.426119	-2.53602	0.490041	0.745943	-2.67854	0.465981	0.757556	-3.05601	0.405538	0.65219
Rg_000392	PREDICTED: uncharacterized protein LOC109179592 [Ipomoea nil]	IPR004252_Probable transposase, Ptta/En/Spm, plant	AT3G27810.2	MYB21	myb domain protein 21	0	0	0	0	0.1	0.08	0	0	0	0	0.14	0	0.25	0	0	0.07	0.1	0	3.3511	0.341471	0.535283	0	1	1	-4.3481	0.217111	0.40057	0.269297	0.935958	1	-0.408503	0.903591	0.99289	0.171558	0.95908	1
Rg_000393	hypothetical protein [Beta vulgaris subsp. vulgaris]	IPR026960_Reverse transcriptase zinc-binding domain; IPR005135_Endonuclease/exonuclease/phosphatase; IPR036691_Endonuclease/exonuclease/phosphatase superfamily; IPR000477_Reverse transcriptase domain; IPR002156_Ribonuclease H domain; IPR012337_Ribonuclease H-like superfamily	AT5G52450.1	.	MATE efflux family protein	0.03	0.25	1.73	20.91	14.65	37.96	0.59	3.57	0.46	0.49	0.82	4.47	1.45	1.01	7.47	5.5	7.03	3.37	4.23443	1.26206e-05	0.000175098	0.329507	0.734917	0.885299	-3.90492	4.98494e-05	0.000554029	-2.79494	0.00364185	0.0207015	-1.26293	0.188252	0.471192	-3.002	0.00178169	0.0104521
Rg_000394	uncharacterized protein LOC101212255 isoform X1 [Cucumis sativus]	IPR012337_Ribonuclease H-like superfamily; IPR036875_Zinc finger, CCHC-type superfamily; IPR001584_Integrase, catalytic core; IPR025724_GAG-pre-integrase domain; IPR001878_Zinc finger, CCHC-type; IPR013103_Reverse transcriptase, RNA-dependent DNA polymerase	AT4G23160.3	CRK8	cysteine-rich RECEPTOR-like kinase	0	0.23	0.77	0.72	0.23	0.23	0.25	0.2	0	0.16	0.1	0.26	0.64	0.24	0.39	0.2	0.44	0.05	-0.860488	0.331895	0.525035	-2.04708	0.0249108	0.090769	-1.18659	0.189287	0.365504	-0.186447	0.834234	0.960811	-0.50816	0.571462	0.830118	0.00474554	0.995702	1
Rg_000395	187-kDa microtubule-associated protein AIR9 [Sesamum indicum] XP_020554012.1 187-kDa microtubule-associated protein AIR9 [Sesamum indicum]	IPR025875_Leucine rich repeat 4	AT2G34680.2	AIR9	Outer arm dynein light chain 1 protein	1.39	9.06	22.86	48.69	44.31	45.8	28.24	31.7	21.05	6.56	2.8	9.14	12.89	11.62	9.88	18.26	49.21	3.98	0.750369	0.0556502	0.148745	0.214244	0.585	0.781521	-0.536125	0.17062	0.340254	-1.96229	5.72954e-07	8.6009e-06	-0.876318	0.0252466	0.124329	-2.16351	3.44254e-08	6.16187e-07
Rg_000396	LOW QUALITY PROTEIN: chromatin modification-related protein EAF1 B [Sesamum indicum]	IPR014012_Helicase/SANT-associated domain	AT3G24880.2	.	Helicase/SANT-associated, DNA binding protein	1.39	4.64	9.44	12.96	14.16	14.11	14.2	14.76	9.94	5.81	8.44	6.44	12.64	12.45	11.46	8.59	12.98	1.49	-0.162865	0.156128	0.315312	-0.0118757	0.918035	0.998493	0.150989	0.173805	0.344629	-0.124369	0.271244	0.535312	-0.654862	1.338e-08	5.74837e-07	-0.3255	0.00365746	0.0191118
Rg_000397	uncharacterized protein LOC105158089 [Sesamum indicum]	IPR000253_Forkhead-associated (FHA) domain; IPR003593_AAA+ ATPase domain; IPR008984_SMAD/FHA domain superfamily; IPR041569_AAA ATPase, AAA+ lid domain; IPR003959_ATPase, AAA-type, core; IPR027417_P-loop containing nucleoside triphosphate hydrolase	AT1G02890.1	.	AAA-type ATPase family protein	0.93	3.64	8.07	11.66	10.05	10.86	14.93	15.3	8.66	6.84	6.88	7.53	15.36	13.54	12.27	9.79	17.38	1.6	-0.140221	0.354307	0.548179	0.343913	0.0230068	0.0854172	0.484134	0.000970809	0.00658897	0.286782	0.0527958	0.174576	-0.0534689	0.72012	0.916273	0.188328	0.200483	0.420423
Rg_000398	uncharacterized protein LOC105167800 [Sesamum indicum]	IPR000477_Reverse transcriptase domain; IPR005162_Retrotransposon gag domain; IPR041577_Reverse transcriptase/retrotransposon-derived protein, RNase H-like domain	.	.	.	0.07	0.16	0.46	0.22	0.13	0.2	1.51	1.3	0.56	0.06	0.04	0.1	0.28	0.16	0.23	0.2	0.5	0.02	-1.85311	8.99545e-05	0.000905276	0.973425	0.0238941	0.0879212	2.82653	1.89573e-10	9.75945e-09	-0.549521	0.323919	0.594315	0.389395	0.432721	0.732753	0.148638	0.761893	0.907777
Rg_000399	glutamate synthase 1 [NADH], chloroplastic isoform X3 [Sesamum indicum]	IPR002489_Glutamate synthase, alpha subunit, C-terminal; IPR023753_FAD/NAD(P)-binding domain; IPR009051_Alpha-helical ferredoxin; IPR006005_Glutamate synthase, NADH/NADPH, small subunit 1; IPR036485_Glutamate synthase, alpha subunit, C-terminal domain superfamily; IPR028261_Dihydroprymidine dehydrogenase domain II; IPR002932_Glutamate synthase domain; IPR036188_FAD/NAD(P)-binding domain superfami…	AT5G53460.1	GLT1	NADH-dependent glutamate synthase 1	1.36	2.64	5.99	14.59	10.42	12.42	23.75	29.77	3.11	1.13	1.38	3.26	42.77	31.59	14.03	12.54	14.37	1.76	0.133686	0.812179	0.913229	0.869533	0.122143	0.286965	0.735847	0.189584	0.365808	-1.7993	0.00142858	0.00939455	-0.177049	0.752635	0.931718	1.07337	0.0556214	0.16875
Rg_000400	wall-associated kinase 2 [Prunus dulcis]	IPR012337_Ribonuclease H-like superfamily; IPR013103_Reverse transcriptase, RNA-dependent DNA polymerase; IPR001584_Integrase, catalytic core; IPR005162_Retrotransposon gag domain; IPR029472_Retrotransposon Copia-like, N-terminal; IPR025724_GAG-pre-integrase domain	AT4G23160.3	CRK8	cysteine-rich RECEPTOR-like kinase	0.08	0.14	0.63	2.15	2.61	2.44	0.27	0.93	0.04	1.6	1.46	1.48	2.24	1.38	2.23	1.68	2.03	0.29	1.66064	0.00197666	0.0113549	-0.755056	0.17508	0.365641	-2.41569	5.09311e-06	7.88563e-05	0.237879	0.641122	0.855311	-0.610793	0.235555	0.535642	-0.455609	0.372641	0.621025
Rg_000401	hypothetical protein C5H24_11650, partial [Xylella fastidiosa]	IPR005135_Endonuclease/exonuclease/phosphatase; IPR036691_Endonuclease/exonuclease/phosphatase superfamily; IPR000477_Reverse transcriptase domain	AT2G30390.1	FC2	ferrochelatase 2	0	0.11	0	0	0.15	0	0	0	0	1.43	0.62	0	0.72	0.73	0	0.62	0	0	-1.25748	0.7644	0.885464	-5.35252	0.217293	0.42226	-4.09504	0.344501	0.544695	4.72539	0.257147	0.518165	2.00474	0.631372	0.867128	3.05616	0.463815	0.703255
Rg_000402	ribosomal protein S3 [Castilleja paramensis] ANJ04347.1 ribosomal protein S3 [Castilleja paramensis]	IPR001351_Ribosomal protein S3, C-terminal; IPR036419_Ribosomal protein S3, C-terminal domain superfamily; IPR009019_K homology domain superfamily, prokaryotic type	ATMG00090.1	RPS3	structural constituent of ribosome;protein binding protein	1.14	1.11	1.97	0.21	0.17	0.42	0.75	0.66	0.37	0.2	0.3	0.29	0.22	0.08	0.14	3.88	0.84	0.83	-4.61339	3.97734e-11	3.22281e-09	-3.26279	2.08496e-06	3.53747e-05	1.35061	0.0562502	0.155992	0.841	0.241339	0.498569	3.54309	4.03025e-07	1.21963e-05	-1.02624	0.17185	0.379433
Rg_000403	uncharacterized protein LOC112193973 [Rosa chinensis]	IPR026960_Reverse transcriptase zinc-binding domain; IPR012337_Ribonuclease H-like superfamily; IPR000477_Reverse transcriptase domain; IPR002156_Ribonuclease H domain	AT3G63120.2	CYCP1;1	cyclin p1;1	0.12	0.42	0.97	1.07	0.73	0.65	2.68	1.65	0.19	0.03	0.15	0.14	0.51	0.35	0.28	0.6	0.87	0.11	-0.820548	0.165425	0.328336	0.251959	0.668443	0.839592	1.07251	0.065118	0.172934	-2.06566	0.00127545	0.00853456	-0.348131	0.559594	0.822296	-1.22993	0.0411008	0.134258
Rg_000404	E3 ubiquitin-protein ligase UPL3 [Striga asiatica]	IPR000569_HECT domain; IPR016024_Armadillo-type fold; IPR035983_HECT, E3 ligase catalytic domain; IPR000225_Armadillo	AT4G38600.1	KAK	HECT ubiquitin protein ligase family protein KAK	2.61	11	25.27	47.38	42.85	44.5	38.39	42.97	30.55	19.2	27.63	22.04	55.78	52.61	50.01	30.3	62.59	6.51	0.326311	0.0132746	0.0508259	0.306078	0.0204474	0.0780594	-0.0202338	0.876231	0.949868	-0.0895527	0.491897	0.747454	-0.264247	0.0429715	0.181236	0.0875979	0.499651	0.732142
Rg_000405	.	.	.	.	.	0.16	0.52	1.43	24.16	25.93	24.8	0.47	2.03	1.41	8.67	11.14	8.93	21.59	18.87	20.05	26.12	30.19	3.39	3.67635	1.54158e-27	2.95628e-24	-0.331078	0.342024	0.565379	-4.00742	5.80379e-34	1.13696e-30	-0.500452	0.11753	0.31105	-0.161277	0.613733	0.857023	-0.457351	0.152041	0.349282
Rg_000406	hypothetical protein CDL12_09954 [Handroanthus impetiginosus]	IPR031937_PNN-interacting serine/arginine-rich protein	AT1G70620.3	.	cyclin-like protein	0.21	0.76	2.34	1.11	1.52	1.38	3.6	2.21	2.94	0.55	0.75	0.71	1.83	0.92	1.72	1.21	3.26	0.34	-1.11179	0.00153123	0.00926156	0.287843	0.405953	0.628242	1.39963	4.41862e-05	0.000500961	-0.133223	0.708108	0.894911	0.4358	0.213491	0.507007	-0.00169482	0.996131	1
Rg_000407	polyprotein [Broad bean wilt virus 2]	IPR009003_Peptidase S1, PA clan; IPR004004_Helicase/polymerase/peptidase polyprotein, Calicivirus-type; IPR000199_Peptidase C3A/C3B, picornaviral; IPR000605_Helicase, superfamily 3, single-stranded DNA/RNA virus; IPR001205_RNA-directed RNA polymerase, C-terminal domain	.	.	.	0	0	0	1739.73	0	0	0	0	0	2025.13	0	0	4466.56	0	0	8131.56	0	0	27.6529	NA	NA	0	NA	NA	-40.0196	NA	NA	1.4373	NA	NA	2.34707	NA	NA	1.23753	NA	NA
Rg_000408	autophagy-related protein 2 [Sesamum indicum] XP_020551971.1 autophagy-related protein 2 [Sesamum indicum]	IPR026885_Autophagy-related protein 2, CAD motif; IPR026854_Vacuolar protein sorting-associated protein 13, N-terminal domain	AT3G19190.2	ATG2	autophagy 2	0.3	0.71	1.19	13.22	11.2	10.24	5.14	7.71	7.27	3.15	3.15	4.97	5.79	7.37	8.69	3.44	5.83	0.96	2.20316	4.63886e-11	3.69381e-09	1.7056	3.77098e-07	7.73431e-06	-0.497552	0.121301	0.268763	-0.709889	0.0276278	0.106277	-1.39529	1.72009e-05	0.000330152	-0.789766	0.0140085	0.0579934
Rg_000409	PREDICTED: callose synthase 7-like [Erythranthe guttata]	IPR026899_1,3-beta-glucan synthase subunit FKS1-like, domain-1; IPR003440_Glycosyl transferase, family 48; IPR039431_Vta1/callose synthase, N-terminal	AT1G06490.1	CalS7	glucan synthase-like 7	0.31	0.61	2.89	5.27	5.48	5.73	6.54	6.33	6.43	3.14	6.34	5.25	4.66	5.07	3.47	6.2	10.57	1.26	0.708897	0.0122229	0.0476124	1.20859	1.92182e-05	0.000248226	0.499689	0.0660641	0.174668	0.69172	0.0110718	0.051707	0.341966	0.210918	0.503704	-0.47754	0.0814846	0.224274
Rg_000410	H+/oligopeptide symporter [Handroanthus impetiginosus]	0	AT5G13400.1	.	Major facilitator superfamily protein	0.16	0.32	0.55	0.48	0.35	0.29	0	0.07	0.12	0.51	0.81	0.72	2.76	2.58	1.52	1.01	1.32	0.14	-1.68927	1.41525e-05	0.00019237	-3.97158	3.55382e-14	3.11747e-12	-2.28231	1.48445e-05	0.000197	1.76018	3.25594e-06	4.20796e-05	1.33949	0.000476362	0.00555733	2.48105	1.70303e-11	5.04648e-10
Rg_000411	putative galacturonosyltransferase-like 4 [Glycine soja]	IPR005135_Endonuclease/exonuclease/phosphatase; IPR000477_Reverse transcriptase domain; IPR036691_Endonuclease/exonuclease/phosphatase superfamily	AT2G30390.1	FC2	ferrochelatase 2	0.06	0.19	0.32	0.29	0.49	0.14	0.13	0.03	0.13	0.95	0.54	0.63	1.24	0.71	1.6	1.32	1.53	0.28	-0.988954	0.0786094	0.192132	-2.42143	0.000100183	0.00101234	-1.43248	0.0193017	0.0703791	2.14445	6.19975e-05	0.000600939	2.13379	6.84516e-05	0.0010902	1.80704	0.000718268	0.00480005
Rg_000412	protein TPR2 [Sesamum indicum]	IPR036322_WD40-repeat-containing domain superfamily; IPR001680_WD40 repeat	AT1G15750.3	TPL	Transducin family protein / WD-40 repeat family protein	0	0	0.61	1.67	1.61	1.15	1.5	2.8	0	0.39	0.73	0	0.9	0.96	2.39	2.74	3.01	0	2.20909	0.288887	0.479848	2.25546	0.278986	0.496887	0.046372	0.982074	1	-1.14659	0.579206	0.814424	0.0999619	0.961382	1	-0.170313	0.934236	0.99196
Rg_000413	PREDICTED: uncharacterized protein LOC107059585 [Solanum tuberosum]	IPR007021_Domain of unknown function DUF659; IPR012337_Ribonuclease H-like superfamily	AT5G09420.1	TOC64-V	translocon at the outer membrane of chloroplasts 64-V	0.07	0.53	0.45	0	0	0	0.87	0.26	0	0	0	0	0.07	0.09	0	0	0.11	0.02	-8.92243	6.5724e-06	0.000100585	-1.40701	0.379126	0.602917	7.51541	0.000147701	0.00138269	0	1	1	4.73944	0.0199452	0.105296	4.43624	0.0286686	0.101922
Rg_000414	hypothetical protein [Beta vulgaris subsp. vulgaris]	IPR025836_Zinc knuckle CX2CX4HX4C; IPR025558_Domain of unknown function DUF4283	ATMG01250.1	ORF102	RNA-directed DNA polymerase (reverse transcriptase)	0.02	0.05	0.05	3.79	5.11	3.58	0.08	0.46	0.39	0.19	0.08	0.12	0.37	0.45	0.26	2.29	3.03	0.42	4.91473	6.56209e-16	1.67538e-13	1.44428	0.0221977	0.083119	-3.47046	2.41838e-12	1.9275e-10	-4.0463	1.29406e-14	5.74774e-13	-0.859023	0.0679596	0.248294	-3.68945	1.26545e-13	5.01844e-12
Rg_000415	putative 1-phosphatidylinositol-3-phosphate 5-kinase FAB1C isoform X2 [Sesamum indicum]	IPR002423_Chaperonin Cpn60/TCP-1 family; IPR002498_Phosphatidylinositol-4-phosphate 5-kinase, core; IPR027409_GroEL-like apical domain superfamily	AT1G71010.1	FAB1C	FORMS APLOID AND BINUCLEATE CELLS 1C	1.1	4.53	14.59	38.89	43.28	35.01	12.75	16.8	10.8	3.18	4.04	5.57	24.02	20.81	20.69	27.5	43.7	4.87	1.19606	3.03087e-08	1.02609e-06	-0.10306	0.635001	0.817066	-1.29912	1.25341e-09	5.23898e-08	-2.3068	1.87271e-26	2.45438e-24	-0.436648	0.0408404	0.174975	-0.987357	3.73871e-06	4.48595e-05
Rg_000416	Acyl-CoA synthetase [Handroanthus impetiginosus]	IPR013103_Reverse transcriptase, RNA-dependent DNA polymerase; IPR025724_GAG-pre-integrase domain; IPR012337_Ribonuclease H-like superfamily; IPR001584_Integrase, catalytic core	AT4G05160.1	.	AMP-dependent synthetase and ligase family protein	0.46	1.74	2.05	0	0.03	0	4.55	3.53	0.71	0.18	0.9	0.08	0.1	0.02	0.02	0.02	0.02	0	-9.18296	2.43147e-12	2.73836e-10	-0.542989	0.505711	0.716615	8.63997	4.1909e-11	2.48391e-09	6.3011	1.72499e-06	2.36269e-05	0.544799	0.737683	0.924937	2.18267	0.122699	0.300877
Rg_000417	zinc finger CCCH domain-containing protein 19 [Sesamum indicum]	IPR004343_Plus-3 domain; IPR003121_SWIB/MDM2 domain; IPR019835_SWIB domain; IPR036128_Plus3-like superfamily; IPR036885_SWIB/MDM2 domain superfamily; IPR001965_Zinc finger, PHD-type; IPR011011_Zinc finger, FYVE/PHD-type	AT2G16485.2	NERD	GW repeat- and PHD finger-containing protein NERD	0.27	0.6	1.29	1.56	1.93	1.69	1.41	1.91	1.36	0.81	1.01	0.74	1.88	1.99	2.4	1.09	1.79	0.13	-0.387709	0.114351	0.251632	-0.294668	0.234876	0.444604	0.0930406	0.693996	0.839177	-0.142506	0.559041	0.799757	-0.723568	0.00406545	0.0312815	0.136155	0.562732	0.779423
Rg_000418	oxysterol-binding protein-related protein 1D [Sesamum indicum]	IPR000648_Oxysterol-binding protein; IPR037239_Oxysterol-binding protein superfamily; IPR001849_Pleckstrin homology domain	AT1G13170.1	ORP1D	OSBP(oxysterol binding protein)-related protein 1D	0.04	0.09	0.29	0	0.16	0.18	0.63	0.66	0.67	0.24	0.24	0.08	0.38	0	0.18	0.34	0.26	0	-1.78065	0.0997441	0.227835	0.940858	0.372325	0.596379	2.72151	0.0101272	0.042898	1.57079	0.142756	0.354283	0.606804	0.578278	0.834065	0.423365	0.695841	0.869178
Rg_000419	poly [ADP-ribose] polymerase 1 [Sesamum indicum]	IPR036420_BRCT domain superfamily; IPR001357_BRCT domain; IPR008893_WGR domain; IPR036930_WGR domain superfamily; IPR036616_Poly(ADP-ribose) polymerase, regulatory domain superfamily; IPR004102_Poly(ADP-ribose) polymerase, regulatory domain; IPR012317_Poly(ADP-ribose) polymerase, catalytic domain; IPR012982_PADR1 domain	AT2G31320.1	PARP1	poly(ADP-ribose) polymerase 2	0	0	0	0	0.63	0.36	0	0	0	0	0	0.03	0.9	0.54	0.86	1.4	1.16	0	5.83132	0.00623208	0.0281352	0	1	1	-6.82829	0.00136038	0.00867615	-4.51383	0.0274612	0.105794	1.07871	0.545252	0.813261	1.01458	0.568973	0.783848
Rg_000420	E3 ubiquitin-protein ligase listerin [Phtheirospermum japonicum]	IPR016024_Armadillo-type fold; IPR001841_Zinc finger, RING-type; IPR011016_Zinc finger, RING-CH-type	AT5G58410.2	.	HEAT/U-box domain-containing protein	0.33	1.22	3.56	6.65	5.67	5.14	6.81	6.99	5.84	2.46	2.95	2.92	5.25	4.43	4.45	3.55	6.66	0.75	0.328542	0.0475836	0.132788	0.763693	4.10158e-06	6.43165e-05	0.435151	0.00476916	0.023832	-0.16902	0.28785	0.554744	-0.473967	0.00323529	0.0261942	-0.445893	0.00466157	0.0233848
Rg_000421	callose synthase 3 [Sesamum indicum]	IPR026899_1,3-beta-glucan synthase subunit FKS1-like, domain-1; IPR003440_Glycosyl transferase, family 48; IPR039431_Vta1/callose synthase, N-terminal	AT5G13000.1	GSL12	glucan synthase-like 12	1.53	5.97	19.25	68.65	52.58	58.16	31.49	36.93	29.9	4.24	4	8.09	22.34	16.82	16.23	38.45	78.74	5.21	1.39284	2.06578e-06	3.76492e-05	0.791706	0.00702259	0.0339485	-0.601133	0.0394146	0.120083	-2.54468	4.80766e-18	3.0906e-16	-0.537782	0.0655258	0.242109	-1.84401	2.87252e-10	7.18781e-09
Rg_000422	LOW QUALITY PROTEIN: putative 1-phosphatidylinositol-3-phosphate 5-kinase FAB1C [Sesamum indicum]	IPR002423_Chaperonin Cpn60/TCP-1 family; IPR002498_Phosphatidylinositol-4-phosphate 5-kinase, core; IPR027409_GroEL-like apical domain superfamily	AT1G71010.1	FAB1C	FORMS APLOID AND BINUCLEATE CELLS 1C	1.92	4.95	21.92	21.23	23.24	18.97	11.01	19.81	22.49	3.6	3.89	6.24	16.63	14.48	11.66	34.01	50.15	7.68	-0.202687	0.56481	0.737145	-0.147235	0.675949	0.844899	0.055452	0.874538	0.948802	-1.30905	0.000208687	0.00175697	0.856315	0.0147132	0.0841294	-0.723127	0.0397376	0.130877
Rg_000423	putative 1-phosphatidylinositol-3-phosphate 5-kinase FAB1C isoform X2 [Sesamum indicum]	IPR002423_Chaperonin Cpn60/TCP-1 family; IPR002498_Phosphatidylinositol-4-phosphate 5-kinase, core; IPR027409_GroEL-like apical domain superfamily	AT1G71010.1	FAB1C	FORMS APLOID AND BINUCLEATE CELLS 1C	0.36	1.36	4.75	0.16	0.16	0.05	2.44	2.11	4.76	0.12	0	0	0	0.11	0.09	0.2	0.39	0	-5.47128	2.08461e-08	7.44516e-07	-0.426161	0.650254	0.827647	5.04512	2.28576e-07	5.24203e-06	-0.563018	0.597578	0.827623	0.404867	0.692077	0.902313	-1.00344	0.344742	0.592407
Rg_000424	transcription initiation factor TFIID subunit 1 isoform X2 [Sesamum indicum]	IPR000626_Ubiquitin domain; IPR036741_TAFII-230 TBP-binding domain superfamily; IPR029071_Ubiquitin-like domain superfamily; IPR022591_Transcription initiation factor TFIID subunit 1, domain of unknown function; IPR009067_TAFII-230 TBP-binding	AT1G32750.1	HAF01	HAC13 protein (HAC13)	0.49	2.4	6.19	8.73	8	9.05	4.97	4.95	3.39	3.39	5.47	5.32	11.83	9.63	8.9	7.1	12.15	0.81	0.113596	0.591497	0.757878	-0.5996	0.00519243	0.0267915	-0.713196	0.000647063	0.00472103	0.00742077	0.971543	1	-0.339826	0.104557	0.329237	0.0797923	0.699303	0.871361
Rg_000425	protein TSS [Sesamum indicum] XP_011093816.1 protein TSS [Sesamum indicum] XP_020551138.1 protein TSS [Sesamum indicum]	IPR028275_Clustered mitochondria protein, N-terminal; IPR019734_Tetratricopeptide repeat; IPR011990_Tetratricopeptide-like helical domain superfamily; IPR033646_CLU central domain	AT1G01320.3	.	Tetratricopeptide repeat (TPR)-like superfamily protein	0.29	1.47	2.89	5.52	4.8	4.69	5.2	4.87	3.23	19.81	9.85	15.63	8.71	8.07	10.25	4.69	6.63	0.83	0.194368	0.514296	0.696937	0.263174	0.37856	0.602305	0.0688063	0.813397	0.914469	2.54471	1.14554e-18	7.80204e-17	-0.0765631	0.794192	0.950681	0.715102	0.0136367	0.0567653
Rg_000426	rRNA processing protein Rrp5 [Handroanthus impetiginosus]	IPR012340_Nucleic acid-binding, OB-fold; IPR022967_RNA-binding domain, S1; IPR003107_HAT (Half-A-TPR) repeat; IPR008847_Suppressor of forked; IPR003029_S1 domain; IPR011990_Tetratricopeptide-like helical domain superfamily	AT3G11964.2	.	RIBOSOMAL RNA PROCESSING 5	2.03	7.2	12.24	13.19	14.19	14.09	18.37	21.5	11.69	3.42	3.98	4.49	9.07	7.48	7.31	4.63	10.3	1.56	-0.687028	0.00285898	0.0152602	-0.154348	0.502655	0.714028	0.53268	0.0199754	0.072262	-0.914871	8.17233e-05	0.000767943	-0.994685	1.91378e-05	0.00036209	-0.953071	3.68367e-05	0.000352638
Rg_000427	myb-related protein 305-like isoform X1 [Cucurbita pepo subsp. pepo]	.	AT3G27810.2	MYB21	myb domain protein 21	0	0	0	0	0	0	0	0	0	0	0	0	10.62	6.72	1.94	0	0	0	0	1	1	0	1	1	0	1	1	0	1	1	0	1	1	11.2454	0.0285185	0.101565
Rg_000428	hypothetical protein PHJA_000395400 [Phtheirospermum japonicum]	IPR015410_Domain of unknown function DUF1985	.	.	.	0.1	0.32	0.54	1.98	1.95	2.33	0.38	0.87	0.16	1.12	0.92	1.23	1.9	2.31	1.8	3.74	5.64	0.54	1.07029	0.00264035	0.0143056	-0.902414	0.0174845	0.0694107	-1.9727	2.1571e-08	6.517e-07	-0.0332643	0.920127	1	0.789202	0.015796	0.0886622	-0.21257	0.518679	0.746291
Rg_000429	PREDICTED: uncharacterized protein LOC105971639 [Erythranthe guttata]	IPR036890_Histidine kinase/HSP90-like ATPase superfamily	AT5G24280.2	GMI1	gamma-irradiation and mitomycin c induced 1	0.75	3.5	9.54	10.6	9.19	9.5	11.84	11.75	2.43	0.56	0.79	0.41	0.54	0.55	0.68	0.74	2.76	0.4	-0.278764	0.542918	0.720059	-0.285297	0.533818	0.741077	-0.00653385	0.988591	1	-3.17653	1.56936e-11	4.78404e-10	-2.55343	4.31403e-08	1.66183e-06	-4.18414	1.88983e-18	1.30992e-16
Rg_000430	putative replicase [Rehmannia mosaic virus]	IPR027417_P-loop containing nucleoside triphosphate hydrolase; IPR002588_Alphavirus-like methyltransferase (MT) domain; IPR027351_(+) RNA virus helicase core domain	.	.	.	99.99	104.29	57.9	4.78	7.34	9.39	5.46	6.27	3.67	13.17	20.3	23.71	6.7	5.88	6.41	7.38	3.71	3.33	-6.20075	1.78789e-18	7.76293e-16	-6.47814	5.4252e-20	1.2121e-17	-0.277395	0.695371	0.84011	2.26332	0.00137507	0.00910216	0.477519	0.50012	0.7819	-0.350724	0.620516	0.821316
Rg_000431	uncharacterized protein LOC105157976 isoform X1 [Sesamum indicum]	.	AT5G07980.1	.	dentin sialophosphoprotein-like protein	0.3	0.55	0.63	0.52	0.95	0.98	1.37	0.45	0.27	0.93	0.78	0.92	0	1.15	0.8	1.26	1.51	0	-1.32799	0.219327	0.398749	-1.36955	0.206039	0.407228	-0.0415612	0.969352	1	0.996946	0.355628	0.627546	-0.131538	0.903502	0.992888	-0.462507	0.669425	0.852287
Rg_000432	protein NETWORKED 1A-like [Sesamum indicum]	IPR011684_Protein Networked (NET), actin-binding (NAB) domain	AT3G22790.1	NET1A	Kinase interacting (KIP1-like) family protein	1.04	4.75	12.28	45.5	38.8	41.86	16.4	19.92	9.07	9.32	8.94	14.84	23	20.24	21.28	13.1	29.4	1.9	1.40821	1.64076e-07	4.35498e-06	0.144567	0.592103	0.786172	-1.26364	2.20249e-06	3.79884e-05	-1.02247	0.000128989	0.00114708	-1.50193	2.02912e-08	8.38626e-07	-1.11128	3.09304e-05	0.000301733
Rg_000433	ERD (early-responsive to dehydration stress)family protein [Striga asiatica]	IPR032880_Calcium permeable stress-gated cation channel 1, N-terminal transmembrane domain	AT1G11960.2	.	ERD (early-responsive to dehydration stress) family protein	0.01	0.08	0.2	0.04	1.22	0.14	4.86	4.38	2.96	0.07	0.16	0.05	0.05	0.1	0.12	0.04	0.16	0.02	1.01611	NA	NA	4.34712	NA	NA	3.33101	NA	NA	-1.53305	NA	NA	-2.4931	NA	NA	-2.55115	NA	NA
Rg_000434	uncharacterized protein LOC115717715 [Cannabis sativa]	IPR002156_Ribonuclease H domain; IPR036691_Endonuclease/exonuclease/phosphatase superfamily; IPR000477_Reverse transcriptase domain; IPR026960_Reverse transcriptase zinc-binding domain; IPR012337_Ribonuclease H-like superfamily	AT4G29090.1	.	Ribonuclease H-like superfamily protein	5.35	13.26	37.9	13.1	11.5	13.14	25.63	22.67	21.17	6.19	6.28	6.83	17.58	16.61	16.59	9.48	16.42	3.97	-2.13378	1.33025e-12	1.59162e-10	-0.985828	0.00103395	0.00729271	1.14795	0.000135213	0.00128732	-0.0672058	0.82402	0.95594	0.243453	0.420017	0.722697	0.281069	0.350813	0.598975
Rg_000435	MND1-interacting protein 1 isoform X2 [Sesamum indicum]	.	.	.	.	0.07	0.15	0.35	1.13	0.95	1.5	0.48	0.47	0.54	0.4	0.35	0.42	0.92	0.73	0.6	0.96	1.63	0.28	1.03678	0.00465409	0.0223921	0.0263757	0.945041	1	-1.0104	0.00284752	0.0157365	-0.706394	0.0383975	0.137119	0.0248128	0.939761	1	-0.848683	0.0110532	0.0477138
Rg_000436	AAA-type ATPase family protein [Striga asiatica]	IPR003593_AAA+ ATPase domain; IPR003959_ATPase, AAA-type, core; IPR027417_P-loop containing nucleoside triphosphate hydrolase; IPR041569_AAA ATPase, AAA+ lid domain	AT4G02480.1	.	AAA-type ATPase family protein	0.08	0.67	1.28	1.21	1.1	1.47	1.75	1.65	1.12	0.55	0.92	0.66	1.59	0.97	1.14	1.37	1.89	0.21	-0.536929	0.0551485	0.14777	-0.0407495	0.884002	0.978653	0.49618	0.0636889	0.170281	0.0373309	0.893039	0.990328	0.0539789	0.845324	0.97245	-0.194198	0.478029	0.714961
Rg_000437	hypothetical protein CDL12_16391 [Handroanthus impetiginosus]	IPR036047_F-box-like domain superfamily	AT5G39450.1	.	F-box family protein	0.1	0.16	0.76	0.94	0.8	0.84	2.47	2.26	1.44	0.52	0.67	0.58	0.79	0.6	0.42	0.35	1.26	0.17	-0.165843	0.658531	0.808836	1.33245	0.000293578	0.00255455	1.49829	1.56197e-05	0.000205653	0.338814	0.347102	0.618437	-0.256713	0.487204	0.773162	-0.677634	0.0659949	0.192255
Rg_000438	oxysterol-binding protein-related protein 1D [Sesamum indicum]	IPR000648_Oxysterol-binding protein; IPR037239_Oxysterol-binding protein superfamily; IPR001849_Pleckstrin homology domain	AT1G13170.1	ORP1D	OSBP(oxysterol binding protein)-related protein 1D	0	0.05	0	0.16	0	0.66	0.81	0.12	0.8	0	0	0	0	0.42	0	0	0	0	2.25417	0.514562	0.697134	3.65152	0.290768	0.510293	1.39735	0.680477	0.829434	-6.08739	0.0899132	0.257711	-6.22991	0.0826419	0.282002	-1.13905	0.737868	0.894785
Rg_000439	RHOMBOID-like protein 2 [Olea europaea var. sylvestris]	IPR022764_Peptidase S54, rhomboid domain	AT1G63120.1	RBL2	RHOMBOID-like 2	0.13	0.79	0.66	0.79	0.63	0.97	2.3	1.59	0.31	0.33	1.21	0.39	1.13	1.25	1.3	1.19	2.6	0.11	-1.1308	0.0554015	0.148241	-0.159222	0.786323	0.916735	0.971577	0.0958567	0.22766	0.493508	0.401959	0.671067	0.590222	0.315906	0.628144	0.476967	0.415192	0.660924
Rg_000440	uncharacterized protein LOC113735973 [Coffea arabica]	IPR005135_Endonuclease/exonuclease/phosphatase; IPR012337_Ribonuclease H-like superfamily; IPR026960_Reverse transcriptase zinc-binding domain; IPR000477_Reverse transcriptase domain; IPR036691_Endonuclease/exonuclease/phosphatase superfamily; IPR002156_Ribonuclease H domain	AT4G11650.1	OSM34	osmotin 34	0	0.01	0	0.6	0.44	0.28	0.05	0.04	4.91	0.42	0.21	0.16	0.38	0.22	0.13	6.39	7.66	0.14	5.14102	0.00223896	0.0125372	7.64125	5.22364e-06	7.96081e-05	2.50023	0.0466767	0.136119	0.241335	0.848948	0.968557	3.24378	0.00983864	0.0619877	-1.00028	0.432748	0.676854
Rg_000441	hypothetical protein CDL12_01837 [Handroanthus impetiginosus]	.	AT3G22430.1	.	RNA recognition motif XS domain protein	0.14	0.66	1.01	0.85	2.15	0.91	2.69	2.58	2.54	0.69	0.96	0.23	1.64	1.07	1.36	1.05	1.07	0.15	-0.468241	0.306783	0.49857	0.791681	0.0818302	0.216482	1.25992	0.00473541	0.0237048	-0.195157	0.669345	0.872441	-0.548609	0.234383	0.534311	-0.100571	0.823862	0.940261
Rg_000442	hypothetical protein CDL12_22578 [Handroanthus impetiginosus]	IPR035920_YhbY-like superfamily; IPR001890_RNA-binding, CRM domain	ATCG00670.1	PCLPP	plastid-encoded CLP P	0	0.14	0.31	0.37	0.25	0.25	0.17	0.42	0	2.49	1.16	1.93	2.69	0.6	1.12	1.68	1.49	0.16	-0.276661	0.733057	0.863663	-0.679801	0.410324	0.632142	-0.40314	0.613775	0.779119	3.65584	1.85228e-06	2.52726e-05	2.08675	0.00691542	0.0472926	2.18563	0.00449556	0.0226945
Rg_000443	Voltage-gated shaker-like K+ channel, subunit beta/KCNAB [Handroanthus impetiginosus]	IPR036812_NADP-dependent oxidoreductase domain superfamily; IPR020471_Aldo/keto reductase; IPR023210_NADP-dependent oxidoreductase domain	AT1G60710.1	ATB2	NAD(P)-linked oxidoreductase superfamily protein	0.35	0.61	1.71	9.4	6.76	8.37	2.24	3.77	1	2.62	3.19	2.24	4.75	3.87	4.57	4.63	6.64	0.84	1.52523	6.386e-07	1.39134e-05	-0.096396	0.757222	0.899528	-1.62162	5.50755e-08	1.49088e-06	-0.713042	0.0160638	0.0695032	-0.783738	0.0082493	0.0541993	-1.03654	0.000452489	0.00321911
Rg_000444	oxysterol-binding protein-related protein 1D [Sesamum indicum]	IPR000648_Oxysterol-binding protein; IPR037239_Oxysterol-binding protein superfamily; IPR001849_Pleckstrin homology domain	AT1G13170.1	ORP1D	OSBP(oxysterol binding protein)-related protein 1D	0.3	0.42	0.77	0	0.54	0.36	1.79	2.04	1.66	0.77	0.22	0	0.38	0.26	0.58	0	0.6	0.13	-2.65643	0.0498865	0.137447	0.139744	0.917329	0.998213	2.79618	0.0385397	0.118109	1.068	0.431664	0.697895	0.302646	0.824541	0.963733	0.235456	0.862586	0.959216
Rg_000445	protein TPR2 [Sesamum indicum]	IPR036322_WD40-repeat-containing domain superfamily; IPR001680_WD40 repeat	AT1G15750.3	TPL	Transducin family protein / WD-40 repeat family protein	0.52	1.64	3.68	6.56	4.3	6.55	7.48	7.25	3.34	1.29	1.21	2.16	5.2	2.19	1.42	3.47	4.92	0.6	0.0140766	0.970819	1	0.279905	0.467275	0.683821	0.265828	0.485042	0.675753	-0.989854	0.0102413	0.0484466	-0.735237	0.0559551	0.217684	-1.17247	0.00226907	0.0128115
Rg_000446	uncharacterized protein LOC113735973 [Coffea arabica]	IPR036691_Endonuclease/exonuclease/phosphatase superfamily; IPR000477_Reverse transcriptase domain; IPR012337_Ribonuclease H-like superfamily; IPR005135_Endonuclease/exonuclease/phosphatase; IPR026960_Reverse transcriptase zinc-binding domain; IPR002156_Ribonuclease H domain	AT4G29090.1	.	Ribonuclease H-like superfamily protein	0	0	0	0.06	0	0.09	0	0.02	0.05	0.08	0.06	0.22	7.49	5.21	4.07	0.42	0.17	0.01	2.96349	0.043881	0.125115	2.21382	0.151393	0.331118	-0.749666	0.490089	0.680061	2.2565	0.014046	0.0625405	2.15897	0.0191034	0.102103	6.71137	2.68013e-14	1.1541e-12
Rg_000447	hypothetical protein [Beta vulgaris subsp. vulgaris]	IPR000477_Reverse transcriptase domain; IPR026960_Reverse transcriptase zinc-binding domain	AT4G29090.1	.	Ribonuclease H-like superfamily protein	0.05	0.09	0.24	2.36	1.7	3.46	0.82	1.6	1.92	0.06	0.03	0.01	0.65	0.39	0.22	0.47	0.48	0.08	2.67586	8.33282e-07	1.74378e-05	2.1789	6.58056e-05	0.000712844	-0.496954	0.31052	0.508754	-5.21607	2.01956e-14	8.7407e-13	-2.56122	8.11412e-07	2.27394e-05	-2.77947	6.10724e-08	1.04566e-06
Rg_000448	hypothetical protein [Proteus mirabilis] MBB6642046.1 hypothetical protein [Proteus mirabilis]	IPR003181_Large coat protein; IPR003182_RNA2 polyprotein	AT4G21270.1	ATK1	kinesin 1	0.4	0.9	1.39	15.11	7.21	8.44	1.88	4.52	4.21	0.46	1.26	1.92	2.48	1.71	4.09	3.37	10.62	0.59	1.63919	0.00190118	0.0110083	0.416272	0.431921	0.651762	-1.22292	0.0192144	0.0701536	-2.19004	3.18423e-05	0.000328857	-1.10018	0.0354338	0.158537	-1.99728	0.000137449	0.00113379
Rg_000449	hypothetical protein CKAN_02080200 [Cinnamomum micranthum f. kanehirae]	IPR013103_Reverse transcriptase, RNA-dependent DNA polymerase; IPR025724_GAG-pre-integrase domain; IPR001584_Integrase, catalytic core; IPR012337_Ribonuclease H-like superfamily; IPR036875_Zinc finger, CCHC-type superfamily; IPR001878_Zinc finger, CCHC-type	AT4G23160.3	CRK8	cysteine-rich RECEPTOR-like kinase	0.02	0.4	0.64	0.87	0.97	0.97	0.04	0.21	0	0.57	0.96	0.7	1.71	2.23	1.36	0.81	1.66	0.23	0.0450919	0.92954	0.978762	-3.19324	1.30923e-07	3.01184e-06	-3.23833	3.86321e-08	1.08975e-06	0.528997	0.283371	0.549686	0.226134	0.648603	0.877406	0.758472	0.120414	0.296977
Rg_000450	hypothetical protein PHJA_000395400 [Phtheirospermum japonicum]	IPR015410_Domain of unknown function DUF1985	.	.	.	0.39	1.33	4.2	3.38	3.11	4.05	4.21	3.79	1.98	1.41	1.4	1.58	3.06	2.55	2.65	4.79	5.35	0.66	-0.570975	0.0175228	0.0628003	-0.432021	0.0736222	0.200753	0.138954	0.556304	0.733519	-0.36363	0.132599	0.337803	0.228983	0.33582	0.648546	-0.504686	0.0347698	0.11815
Rg_000451	hua2-like protein 2 [Phtheirospermum japonicum]	IPR006569_CID domain; IPR006903_RNA polymerase II-binding domain; IPR000313_PWWP domain	AT3G63070.1	.	Tudor/PWWP/MBT domain-containing protein	0	0.27	0.46	1.43	1.39	0.66	0.88	1.02	0.16	0.74	0.49	0.29	0.97	0.94	0.83	0.93	1.38	0.12	0.926609	0.142169	0.294822	0.350078	0.582878	0.779975	-0.576531	0.343725	0.543851	-0.232006	0.703421	0.892274	-0.398664	0.514461	0.791912	-0.481749	0.427553	0.672041
Rg_000452	hypothetical protein [Beta vulgaris subsp. vulgaris]	IPR002156_Ribonuclease H domain; IPR012337_Ribonuclease H-like superfamily; IPR036691_Endonuclease/exonuclease/phosphatase superfamily; IPR026960_Reverse transcriptase zinc-binding domain; IPR000477_Reverse transcriptase domain	AT4G29090.1	.	Ribonuclease H-like superfamily protein	1.43	6.08	10.59	1.69	3.36	4.5	39.2	29.28	8.27	0.57	0.33	1.47	1.1	0.75	0.71	1.21	3.33	0.74	-2.45812	3.46416e-05	0.000409652	0.693535	0.241164	0.452284	3.15165	1.05064e-07	2.64051e-06	-1.11283	0.0641162	0.20179	-0.303	0.612146	0.855971	-2.09438	0.000530126	0.00368913
Rg_000453	replicase read-through product [Youcai mosaic virus]	IPR027351_(+) RNA virus helicase core domain; IPR027417_P-loop containing nucleoside triphosphate hydrolase; IPR002588_Alphavirus-like methyltransferase (MT) domain	.	.	.	309.68	181.48	18.62	1.21	3.07	2.32	0.05	0.45	0.67	5.14	1.14	3.45	0.28	0.51	0.54	0.12	0.1	45.42	-9.30355	1.50532e-07	4.06265e-06	-11.4834	1.03618e-10	4.81717e-09	-2.17982	0.220277	0.404636	1.51478	0.39268	0.662584	5.39133	0.00233963	0.0202396	-2.47503	0.164196	0.368109
Rg_000454	PREDICTED: paladin [Erythranthe guttata]	IPR029021_Protein-tyrosine phosphatase-like	AT3G62010.1	.	metal ion-binding protein	0.2	0	0.75	0.25	0	0.55	0.62	1.89	0.87	0	0	0	0.42	0	0.67	0.44	0	0	-2.10012	0.405359	0.599028	0.166551	0.947289	1	2.26667	0.368571	0.568858	-6.02127	0.030369	0.114311	-0.884391	0.727851	0.920011	0.290782	0.908342	0.979636
Rg_000455	1-phosphatidylinositol-3-phosphate 5-kinase FAB1A [Sesamum indicum]	IPR011011_Zinc finger, FYVE/PHD-type; IPR002498_Phosphatidylinositol-4-phosphate 5-kinase, core; IPR027409_GroEL-like apical domain superfamily; IPR000306_FYVE zinc finger; IPR002423_Chaperonin Cpn60/TCP-1 family	AT3G14270.2	FAB1B	phosphatidylinositol-4-phosphate 5-kinase family protein	0.59	1.28	3.23	7.07	7.48	7.13	4.11	4.64	3.67	5.11	5.96	5.51	10.61	7.76	10.39	4.17	7.32	0.65	0.468302	0.0124403	0.0482902	-0.0857762	0.652515	0.828999	-0.554078	0.00216599	0.0126434	0.501088	0.00493788	0.0267218	-0.72566	7.97064e-05	0.00124406	0.258967	0.144617	0.337327
Rg_000456	uncharacterized protein LOC105157976 isoform X1 [Sesamum indicum]	.	AT5G07940.1	.	dentin sialophosphoprotein-like protein	0.84	3.76	7.7	15.16	16.38	13.77	9.99	12.74	9.26	5.23	6.72	5.48	15.05	12.45	11.8	10.54	17.02	1.64	0.371601	0.00352802	0.0179749	0.118448	0.357546	0.581715	-0.253153	0.038558	0.118155	-0.49494	7.04261e-05	0.000673085	-0.496471	6.71519e-05	0.00107204	-0.35762	0.00346878	0.0183035
Rg_000457	putative transcription factor 5qNCA, contains JmjC domain [Handroanthus impetiginosus]	IPR018866_Zinc-finger domain of monoamine-oxidase A repressor R1; IPR003347_JmjC domain	AT1G11950.1	.	Transcription factor jumonji (jmjC) domain-containing protein	0.44	2.09	4.64	3.88	4.96	3.62	7.35	6.73	2.63	1.32	1.91	1.45	4.94	3.74	3.37	5.03	6.15	0.67	-0.655182	0.0136685	0.0520078	-0.036606	0.890218	0.982588	0.618576	0.0179518	0.0666258	-0.538631	0.0446379	0.153797	0.0858173	0.745893	0.928782	-0.210071	0.425604	0.670338
Rg_000458	LOW QUALITY PROTEIN: protein TORNADO 1 [Sesamum indicum]	IPR027417_P-loop containing nucleoside triphosphate hydrolase; IPR032171_C-terminal of Roc (COR) domain; IPR001611_Leucine-rich repeat	AT5G55540.1	TRN1	tornado 1	0.05	1.17	4.71	12.37	14.57	13.11	3	6.33	0.96	3.18	2.59	2.89	6.59	6.43	4.68	5.51	9.02	0.55	1.74338	0.00356268	0.0181197	-0.0898151	0.881065	0.976792	-1.83319	0.00206084	0.0121746	-1.29717	0.0291623	0.110766	-1.43142	0.016155	0.0901038	-1.3355	0.0245565	0.0903288
Rg_000459	piezo-type mechanosensitive ion channel component1 [Striga asiatica]	IPR031334_Piezo non-specific cation channel, R-Ras-binding domain	AT2G48060.2	.	piezo-type mechanosensitive ion channel component	0	0.79	1.34	2.29	2.74	2.48	1.68	3	1.13	0.49	0.59	0.8	2.54	2.95	2.06	2.17	2.91	0.27	0.605667	0.284212	0.474796	0.423394	0.455406	0.67292	-0.182273	0.742857	0.872649	-1.12256	0.0461523	0.157788	-0.38599	0.489457	0.77468	-0.148226	0.789452	0.922339
Rg_000460	TMV resistance N-like [Olea europaea subsp. europaea]	IPR003593_AAA+ ATPase domain; IPR027417_P-loop containing nucleoside triphosphate hydrolase; IPR003591_Leucine-rich repeat, typical subtype; IPR002182_NB-ARC	AT1G27170.2	.	transmembrane receptors / ATP binding protein	0.04	0.04	0.12	5.2	4.52	5.84	0.42	2.26	1.99	1.85	1.39	1.7	3.04	3.45	2.73	5.63	6.59	0.51	4.6014	1.85003e-15	4.27158e-13	3.14986	6.452e-08	1.60528e-06	-1.45153	0.00269002	0.0150361	-0.741861	0.124078	0.322687	-0.239567	0.618481	0.859317	-0.902159	0.0608478	0.180769
Rg_000461	cyclin-dependent kinase G-2-like isoform X1 [Sesamum indicum] XP_020551841.1 cyclin-dependent kinase G-2-like isoform X1 [Sesamum indicum] XP_020551842.1 cyclin-dependent kinase G-2-like isoform X1 [Sesamum indicum] XP_020551843.1 cyclin-dependent kinase G-2-like isoform X1 [Sesamum indicum] XP_020551844.1 cyclin-dependent kinase G-2-like isoform X1 [Sesamum indicum] XP_020551845.1 cyclin-depende…	IPR000719_Protein kinase domain; IPR011009_Protein kinase-like domain superfamily	AT1G67580.1	.	Protein kinase superfamily protein	0.16	0.79	1.63	4.54	4.91	5.35	4.24	3.45	0.99	2.21	2.09	2.44	3.97	4.05	3.06	2.88	5.26	0.79	1.05394	0.0035255	0.017965	0.461553	0.204509	0.405279	-0.592384	0.0911309	0.219581	-0.235159	0.502614	0.756275	-0.414018	0.239191	0.539979	-0.574573	0.100843	0.261626
Rg_000462	proteasome activator subunit 4 [Catalpa bungei]	IPR032430_Proteasome activator Blm10, mid region	AT3G13330.1	PA200	proteasome activating protein 200	0.08	0.38	0.59	1.15	1.03	1.17	0.56	1.11	0.25	0.86	2.69	1.16	1.51	2.15	1.4	0.91	2.24	0.19	0.0967919	0.821093	0.918048	-0.512345	0.241666	0.452874	-0.609137	0.145243	0.304689	1.31417	0.001187	0.00803294	0.094727	0.819378	0.961564	0.453477	0.265529	0.505199
Rg_000463	probable LRR receptor-like serine/threonine-protein kinase At1g06840 [Sesamum indicum]	IPR001611_Leucine-rich repeat; IPR013210_Leucine-rich repeat-containing N-terminal, plant-type; IPR000719_Protein kinase domain; IPR011009_Protein kinase-like domain superfamily	AT5G20350.1	TIP1	Ankyrin repeat family protein with DHHC zinc finger domain-containing protein	0	0	0	0.08	0.09	0.08	0	0.24	0.94	0.1	0.2	0.07	0.14	0	0	0	0	0	3.725	0.0821172	0.198401	6.46206	0.00232553	0.014124	2.73706	0.127513	0.278286	1.43743	0.427044	0.693756	-4.41765	0.0392287	0.170056	-0.998665	0.59221	0.800805
Rg_000464	DDB1- and CUL4-associated factor homolog 1 [Sesamum indicum]	IPR036322_WD40-repeat-containing domain superfamily; IPR006594_LIS1 homology motif; IPR016024_Armadillo-type fold; IPR001680_WD40 repeat	AT4G31160.1	DCAF1	DDB1-CUL4 associated factor 1	0.86	3.78	8.75	11.12	12.55	10.65	11.06	12.67	9.7	4.14	7.02	5.28	12.96	10.93	12.71	6.96	11.02	1.38	-0.100878	0.522885	0.704134	0.111461	0.481328	0.696313	0.212338	0.167484	0.335942	-0.197294	0.206052	0.450522	-0.604192	0.000128027	0.00184982	-0.0536413	0.727875	0.888988
Rg_000465	probable mediator of RNA polymerase ii transcription subunit 26c [Phtheirospermum japonicum]	IPR017923_Transcription factor IIS, N-terminal; IPR035441_TFIIS/LEDGF domain superfamily; IPR003617_Transcription elongation factor, TFIIS/CRSP70, N-terminal, sub-type	AT3G48050.2	SUO	protein SUO	0.25	1.54	3.44	6.21	5.73	5.2	6.72	7.05	4.84	1.87	3.62	3.56	7.72	7.33	7.43	4.31	7.56	0.6	0.29207	0.183028	0.352176	0.657071	0.00275968	0.0162518	0.365001	0.0823923	0.204282	-0.0552499	0.795423	0.941322	-0.376608	0.0796905	0.275566	0.251227	0.231886	0.46296
Rg_000466	translocase of chloroplast 159, chloroplastic, partial [Sesamum indicum]	IPR025558_Domain of unknown function DUF4283; IPR025836_Zinc knuckle CX2CX4HX4C	AT4G02510.1	TOC159	translocon at the outer envelope membrane of chloroplasts 159	0	0	0	1.7	0.25	2.1	0	0.46	0	0.33	0.51	0.48	0.79	0.34	1.18	1.3	3.59	0.41	7.77846	1.30653e-06	2.55232e-05	4.70739	0.00384521	0.0211321	-3.07107	0.00645221	0.0302351	-0.74214	0.500989	0.754748	0.623498	0.57	0.829232	-0.940186	0.393185	0.640521
Rg_000467	acetyl-CoA carboxylase 1-like isoform X2 [Sesamum indicum]	IPR029045_ClpP/crotonase-like domain superfamily; IPR034733_Acetyl-CoA carboxylase	AT1G36160.2	ACC1	acetyl-CoA carboxylase 1	0	0.33	0.11	1.01	0.55	1.21	0.47	0.2	1.01	0.7	0.36	0.91	2.04	1.98	1.49	1.63	0.92	0.07	0.993189	0.247563	0.432421	0.675979	0.433331	0.653028	-0.31721	0.703775	0.846312	0.448348	0.589995	0.822695	-0.0382332	0.963506	1	0.840815	0.310188	0.555406
Rg_000468	uncharacterized protein LOC112167661 [Rosa chinensis]	.	.	.	.	0.19	1.04	1.3	2	3.08	2.97	3.51	3.34	0.5	0	0.32	0	1.19	0.86	0.67	0.75	0.64	0.1	0.0753459	0.928611	0.978502	0.0737792	0.930149	1	-0.00156666	0.998507	1	-3.96412	7.89878e-06	9.37801e-05	-2.20115	0.00969284	0.0612931	-1.74516	0.0383408	0.127391
Rg_000469	transducin family protein / WD-40 repeat family protein [Striga asiatica]	IPR001680_WD40 repeat; IPR036322_WD40-repeat-containing domain superfamily	AT5G43930.4	.	Transducin family protein / WD-40 repeat family protein	0.03	0.12	0.27	1.1	1.22	1.09	1.11	1.87	1.22	0.6	0.91	0.71	0.97	0.88	0.99	1.13	1.3	0.11	1.50999	2.04501e-06	3.73397e-05	2.04786	1.03079e-10	4.79532e-09	0.537869	0.0223754	0.0786731	0.260579	0.28709	0.553844	-0.301548	0.233502	0.533024	-0.396064	0.109077	0.276781
Rg_000470	uncharacterized protein LOC105180271 [Sesamum indicum]	IPR026960_Reverse transcriptase zinc-binding domain; IPR036691_Endonuclease/exonuclease/phosphatase superfamily; IPR000477_Reverse transcriptase domain	AT2G38670.1	PECT1	phosphorylethanolamine cytidylyltransferase 1	0.02	0.03	0.02	2.98	3.46	4.54	0.01	1.52	0.37	1.3	1.63	0.98	2.47	1.75	2.27	2.39	3.16	0.32	5.02991	8.17435e-09	3.30987e-07	2.63357	0.00279352	0.0164091	-2.39634	0.00150238	0.00939731	-0.620847	0.406483	0.675173	-0.783722	0.295228	0.605799	-0.922551	0.217028	0.44295
Rg_000471	piezo-type mechanosensitive ion channel component1 [Striga asiatica]	IPR031334_Piezo non-specific cation channel, R-Ras-binding domain	AT2G48060.2	.	piezo-type mechanosensitive ion channel component	0.29	0.07	0.47	0	0	0	1.07	0.45	0.61	0	0	0	0	0	0	0	0	0	-9.21365	1.25629e-07	3.49015e-06	-0.716052	0.579024	0.777446	8.4976	1.06441e-06	2.00144e-05	0	1	1	0	1	1	0	1	1
Rg_000472	PREDICTED: callose synthase 5-like [Erythranthe guttata]	IPR026899_1,3-beta-glucan synthase subunit FKS1-like, domain-1; IPR003440_Glycosyl transferase, family 48; IPR039431_Vta1/callose synthase, N-terminal	AT2G13680.1	CALS5	callose synthase 5	0	0	0	0	0.05	0	3.43	1.97	1.55	0	0	0	11.48	26.8	13.16	0.12	0.07	0	1.45872	0.331372	0.524543	8.79716	2.30921e-11	1.22632e-09	7.33844	3.89327e-15	5.67169e-13	-2.00883	0.181005	0.414763	1.92647	0.0644326	0.239256	9.84657	4.25998e-26	6.17396e-24
Rg_000473	Retrovirus-related Pol polyprotein from transposon TNT 1-94 [Vitis vinifera]	IPR013103_Reverse transcriptase, RNA-dependent DNA polymerase	AT1G14790.1	RDR1	RNA-dependent RNA polymerase 1	0.1	0.12	0.78	2.38	2.1	2.63	2.65	3.46	2.62	0.69	1.59	1.48	0.69	0.76	0.22	1.5	1.88	0.25	1.37786	0.0013131	0.00818677	1.92455	7.07167e-06	0.000103324	0.54669	0.171074	0.340941	-0.0766952	0.84938	0.968872	-0.752945	0.0658513	0.242892	-2.26544	8.25799e-08	1.38127e-06
Rg_000474	ABC transporter A family member 1 [Sesamum indicum]	IPR027417_P-loop containing nucleoside triphosphate hydrolase; IPR003439_ABC transporter-like; IPR003593_AAA+ ATPase domain	AT2G41700.1	ABCA1	ATP-binding cassette A1	0.69	2.02	4.1	11.84	11.71	11.15	5.09	7.61	8.78	4.72	11.31	5.17	14.48	14.01	13.24	13.34	23.72	2.48	0.720283	0.0134738	0.0514201	0.329886	0.25942	0.473909	-0.390397	0.173789	0.344615	0.126925	0.658127	0.865741	0.355788	0.214493	0.508259	0.120019	0.674944	0.855757
Rg_000475	LOW QUALITY PROTEIN: clathrin heavy chain 1-like [Sesamum indicum]	IPR016024_Armadillo-type fold; IPR000547_Clathrin, heavy chain/VPS, 7-fold repeat; IPR022365_Clathrin, heavy chain, propeller repeat; IPR016341_Clathrin, heavy chain; IPR016025_Clathrin heavy chain, N-terminal; IPR015348_Clathrin, heavy chain, linker, core motif	AT3G11130.1	.	Clathrin, heavy chain	0	0	0.27	0.3	0.09	0.09	1.36	0.93	0.23	0.18	0	0.1	0.3	0.54	0.11	0	0.25	0	0.0886549	0.952366	0.991398	2.68885	0.0672057	0.187971	2.60019	0.0682183	0.17865	0.225273	0.876671	0.982766	-1.30583	0.386102	0.693519	0.849777	0.553794	0.772784
Rg_000476	hypothetical protein PHJA_001203200 [Phtheirospermum japonicum]	IPR036390_Winged helix DNA-binding domain superfamily; IPR007309_B-block binding subunit of TFIIIC	AT1G17450.2	.	B-block binding subunit of TFIIIC	0.22	0.74	1.51	2.59	1.82	2.02	1.7	1.57	1.72	0.87	1.07	0.81	0.95	1.34	0.76	1.06	1.84	0.24	-0.215707	0.385124	0.579028	-0.302244	0.230113	0.438625	-0.0865375	0.71815	0.856577	-0.334235	0.175788	0.406848	-0.785266	0.00187112	0.0168456	-1.21956	1.34957e-06	1.77811e-05
Rg_000477	nuclear pore complex protein NUP214 isoform X2 [Sesamum indicum]	.	AT1G55540.1	LNO1	Nuclear pore complex protein	0	0.29	0.43	1.01	0.86	0.82	0.65	0.66	0.39	0.15	1.11	0.5	1.02	0.95	0.57	0.52	1.77	0.14	0.574615	0.354928	0.548771	0.141998	0.821029	0.939138	-0.432617	0.471037	0.663423	0.177708	0.766394	0.927212	-0.062287	0.91746	0.996749	-0.244084	0.682828	0.860649
Rg_000478	ribonuclease H [Trifolium pratense]	IPR000477_Reverse transcriptase domain; IPR026960_Reverse transcriptase zinc-binding domain; IPR002156_Ribonuclease H domain	ATMG00310.1	ORF154	RNA-directed DNA polymerase (reverse transcriptase)-related family protein	0.08	0.7	2.24	0	0	0	6.65	4.23	3.18	0	0	0	0	0	0	0	0	0	-9.90617	9.56484e-14	1.55371e-11	1.27873	0.0391168	0.126933	11.1849	3.39093e-17	7.11064e-15	0	1	1	0	1	1	0	1	1
Rg_000479	polyprotein [Broad bean wilt virus 2]	IPR000199_Peptidase C3A/C3B, picornaviral; IPR004004_Helicase/polymerase/peptidase polyprotein, Calicivirus-type; IPR000605_Helicase, superfamily 3, single-stranded DNA/RNA virus; IPR009003_Peptidase S1, PA clan; IPR001205_RNA-directed RNA polymerase, C-terminal domain	.	.	.	0	0	0	61.07	0	0	0	0	0	135.78	0	0	1125.46	0	0	6388.76	0	0	23.1726	NA	NA	0	NA	NA	-29.5149	NA	NA	2.36971	NA	NA	6.8274	NA	NA	4.07913	NA	NA
Rg_000480	protein NETWORKED 1D [Sesamum indicum] XP_011079895.1 protein NETWORKED 1D [Sesamum indicum] XP_020550371.1 protein NETWORKED 1D [Sesamum indicum]	IPR011684_Protein Networked (NET), actin-binding (NAB) domain	AT1G03080.2	NET1D	kinase interacting (KIP1-like) family protein	2.44	7.32	17.69	35	29.8	35.31	16.67	20.51	21.13	5.79	10.87	8.67	17.99	14.87	16.93	23.43	37.07	4.7	0.315715	0.118002	0.257207	-0.179004	0.376864	0.600718	-0.49472	0.0136613	0.0542357	-1.12181	2.765e-08	5.28317e-07	-0.378381	0.0597338	0.227436	-1.15362	9.81627e-09	1.91572e-07
Rg_000481	PREDICTED: vacuolar protein sorting-associated protein 8 homolog isoform X2 [Erythranthe guttata]	IPR025941_Vacuolar protein sorting-associated protein 8, central domain	AT4G00800.1	SETH5	transducin family protein / WD-40 repeat family protein	1.03	4.29	10.96	5.27	6.64	10.85	11.59	15.93	7.26	2.59	3.56	4.55	7.42	6.72	4.79	7.76	11.61	0.95	-0.913049	0.00311413	0.016297	-0.117719	0.70271	0.863251	0.79533	0.00961358	0.0412433	-0.229544	0.458438	0.720218	-0.114298	0.711892	0.911746	-0.446627	0.148189	0.343126
Rg_000482	uncharacterized protein LOC105160884 [Sesamum indicum]	.	.	.	.	0.64	1.12	2.78	6.1	10.87	4.98	9.46	11.87	7.27	2.56	4.47	1.94	5.7	5.09	5.85	6.3	9.25	0.94	0.530677	0.108293	0.241879	1.14108	0.000549641	0.00430271	0.610399	0.0593824	0.162091	-0.437228	0.180681	0.414249	-0.272957	0.402913	0.708998	-0.546173	0.0933768	0.247439
Rg_000483	enhancer of mRNA-decapping protein 4 [Sesamum indicum]	.	AT3G13300.1	VCS	Transducin/WD40 repeat-like superfamily protein	0.02	0.29	0.2	0.82	0.34	0.77	0.24	0.2	0.56	0.34	0.23	0.43	0.44	0.2	0.13	0.61	0.28	0.07	0.260305	0.711448	0.847794	-0.320245	0.653633	0.829578	-0.58055	0.39888	0.598972	-0.00217719	0.997467	1	-0.656601	0.345884	0.65838	-1.4962	0.0334024	0.11443
Rg_000484	putative E3 ubiquitin-protein ligase LIN isoform X1 [Sesamum indicum] XP_020551064.1 putative E3 ubiquitin-protein ligase LIN isoform X1 [Sesamum indicum]	IPR003613_U box domain; IPR016024_Armadillo-type fold	AT4G21350.1	PUB8	plant U-box 8	0	0.08	0.13	3.06	2.93	3.13	0.68	0.72	0.19	0	0.09	0	0	0.15	0	0	1.63	0.43	4.17371	0.00811212	0.0346386	1.83593	0.245839	0.458021	-2.33779	0.12673	0.277194	-5.83694	0.000312713	0.00250792	-1.29267	0.397781	0.704539	-6.08325	0.000148634	0.00121488
Rg_000485	RNA-directed DNA polymerase (reversetranscriptase)-related family protein [Striga asiatica]	IPR000477_Reverse transcriptase domain; IPR036691_Endonuclease/exonuclease/phosphatase superfamily	AT1G43760.1	.	DNAse I-like superfamily protein	0.63	1.99	4.06	4.14	6.76	3.04	11.39	12.49	0.16	1.17	1.75	1.2	5.11	4.15	4.88	4.46	6.64	0.78	-0.541531	0.460537	0.649535	0.35502	0.62836	0.812346	0.896552	0.22057	0.405042	-0.884235	0.229105	0.482258	-0.0256924	0.972056	1	-0.126914	0.862484	0.959162
Rg_000486	clathrin heavy chain 2 [Sesamum indicum]	IPR016024_Armadillo-type fold; IPR016341_Clathrin, heavy chain; IPR000547_Clathrin, heavy chain/VPS, 7-fold repeat	AT3G11130.1	.	Clathrin, heavy chain	0	0.13	0	0.77	0	0.95	0.54	0	2.54	0	0.56	0.23	0.42	0.33	0	0	1.27	0	1.91713	0.54065	0.718311	3.2551	0.298707	0.518806	1.33797	0.666523	0.819204	-0.403109	0.89685	0.991952	-1.04199	0.737859	0.924947	-1.38465	0.656332	0.844571
Rg_000487	disease resistance protein at4g27190 [Phtheirospermum japonicum]	IPR027417_P-loop containing nucleoside triphosphate hydrolase; IPR002182_NB-ARC; IPR001611_Leucine-rich repeat	AT4G27190.1	.	NB-ARC domain-containing disease resistance protein	0.19	0.49	0.46	2.75	2.3	2.77	3.64	3.97	1.08	1.8	3.91	2.6	2.68	3	2.32	4.02	5.11	0.57	0.83893	0.0358092	0.10735	1.16612	0.00355183	0.0198388	0.327192	0.390858	0.59087	0.930828	0.014475	0.0640217	0.477921	0.211475	0.504458	-0.119657	0.754454	0.903513
Rg_000488	uncharacterized protein LOC112032201 [Quercus suber]	IPR000477_Reverse transcriptase domain; IPR026960_Reverse transcriptase zinc-binding domain; IPR012337_Ribonuclease H-like superfamily; IPR002156_Ribonuclease H domain	AT4G29090.1	.	Ribonuclease H-like superfamily protein	0	0	0	3.75	3.44	3.04	0	1.01	0	0.71	0.58	0.55	1.4	1.68	1.37	2.52	3.63	0.41	9.09952	NA	NA	5.80798	NA	NA	-3.29155	NA	NA	-1.55432	NA	NA	-0.450312	NA	NA	-1.33971	NA	NA
Rg_000489	putative vacuolar protein sorting-associated protein 13a [Phtheirospermum japonicum]	IPR031645_Vacuolar protein sorting-associated protein 13, C-terminal; IPR009543_Vacuolar protein sorting-associated protein 13, SHR-binding domain; IPR010482_Peroxin domain	AT1G48090.2	.	calcium-dependent lipid-binding family protein	0.93	1.44	4.16	7	6.34	6.41	7.44	8.29	4.64	2.47	3.93	2.35	6.28	7	3.67	11.57	8.32	1.24	-0.146673	0.654777	0.806074	0.124134	0.705326	0.864949	0.270807	0.403902	0.603749	-0.30504	0.350466	0.622022	0.328949	0.311811	0.623753	-0.374899	0.249407	0.485128
Rg_000490	protein CHROMATIN REMODELING 5 isoform X1 [Sesamum indicum] XP_011090160.1 protein CHROMATIN REMODELING 5 isoform X1 [Sesamum indicum] XP_011090161.1 protein CHROMATIN REMODELING 5 isoform X1 [Sesamum indicum] XP_020552647.1 protein CHROMATIN REMODELING 5 isoform X1 [Sesamum indicum]	IPR000953_Chromo/chromo shadow domain; IPR025260_Domain of unknown function DUF4208; IPR001650_Helicase, C-terminal; IPR000330_SNF2-related, N-terminal domain; IPR023780_Chromo domain; IPR027417_P-loop containing nucleoside triphosphate hydrolase; IPR016197_Chromo-like domain superfamily; IPR014001_Helicase superfamily 1/2, ATP-binding domain	AT2G13370.2	CHR5	chromatin remodeling 5	1.77	8.08	12.51	18.05	18.27	16.61	23.36	21.27	14.17	6.46	11.98	8.57	18.79	16.31	16.66	10.64	19.82	2.33	-0.351799	0.0572168	0.15185	0.0377363	0.838402	0.950094	0.389535	0.0333141	0.1059	-0.109417	0.552627	0.795296	-0.474158	0.010444	0.0649714	-0.179273	0.328738	0.575198
Rg_000491	sporulation-specific protein 15 [Sesamum indicum] XP_011098020.1 sporulation-specific protein 15 [Sesamum indicum] XP_011098028.1 sporulation-specific protein 15 [Sesamum indicum] XP_020555076.1 sporulation-specific protein 15 [Sesamum indicum] XP_020555078.1 sporulation-specific protein 15 [Sesamum indicum] XP_020555081.1 sporulation-specific protein 15 [Sesamum indicum]	IPR019448_NT-type C2 domain	AT1G22060.1	.	sporulation-specific protein	0.79	4.3	10.23	18.75	17.7	16.93	8.6	10.84	7.94	3.9	7.62	6.84	12.22	12.67	10.54	20.8	49.6	2.53	0.416564	0.124024	0.266961	-0.293659	0.280233	0.498407	-0.710223	0.00827499	0.0366758	-0.677039	0.012014	0.0552507	0.384011	0.152256	0.415439	-0.736263	0.00616753	0.0295169
Rg_000492	trafficking protein particle complex ii-specific subunit 130 homolog [Phtheirospermum japonicum]	IPR021773_Trafficking protein particle complex subunit 11	AT5G54440.1	CLUB	CLUB	0.25	0.76	2.12	1.49	1.97	1.95	2.7	2.09	0.41	0.37	0.45	0.94	1.46	1.31	1.27	1.3	1.46	0.2	-0.678302	0.138269	0.288957	-0.575218	0.210114	0.412691	0.103084	0.820341	0.918479	-0.722581	0.118568	0.31275	-0.66011	0.153623	0.417471	-0.578441	0.205797	0.427877
Rg_000493	uncharacterized protein LOC114278225 [Camellia sinensis]	IPR005813_Ribosomal protein L20; IPR035566_Ribosomal protein L20, C-terminal	ATCG00670.1	PCLPP	plastid-encoded CLP P	0	0	0	0.18	0.14	0.15	0.21	0.26	0.29	0	0	0	0	0.48	0.56	0	0	0	4.65112	0.0101106	0.041185	5.63811	0.00176794	0.0112772	0.986992	0.476501	0.668344	-5.20123	0.00402489	0.0225358	-5.34374	0.00312655	0.0254976	1.08108	0.434869	0.678916
Rg_000494	nucleosome-remodeling factor subunit bptf [Phtheirospermum japonicum]	IPR018501_DDT domain; IPR011011_Zinc finger, FYVE/PHD-type; IPR019787_Zinc finger, PHD-finger; IPR028942_WHIM1 domain; IPR001965_Zinc finger, PHD-type	AT5G12400.1	.	PHD-finger and DNA binding domain-containing protein	0.96	3.8	7.14	10.99	11.4	10.2	9.17	10.43	7.5	3.79	5.62	4.7	13.03	11.53	11.39	9.89	16.59	1.47	-0.11387	0.315811	0.507735	-0.134279	0.242131	0.4535	-0.0204092	0.851355	0.936466	-0.331636	0.00312406	0.0181916	-0.106117	0.338627	0.651205	-0.00691716	0.949175	0.998722
Rg_000495	putative multidrug resistance protein [Sesamum indicum]	IPR036640_ABC transporter type 1, transmembrane domain superfamily; IPR011527_ABC transporter type 1, transmembrane domain	AT3G28345.1	ABCB15	ABC transporter family protein	0.12	0.51	1.6	4.33	4.78	4.6	2.19	3.24	1.92	1.42	5.29	1.52	3.06	2.19	1.83	3.19	4.66	0.83	1.26612	0.00159142	0.00955261	0.594823	0.140729	0.315305	-0.671298	0.0839212	0.207179	0.0617844	0.873244	0.981356	-0.278797	0.473195	0.763237	-1.11835	0.00411805	0.0211036
Rg_000496	hypothetical protein [Proteus mirabilis] MBB6642046.1 hypothetical protein [Proteus mirabilis]	IPR003181_Large coat protein; IPR003182_RNA2 polyprotein	AT4G33430.1	BAK1	BRI1-associated receptor kinase	0.56	1.63	1.12	4.02	3.31	3.36	2.66	8.95	2.59	2.11	5.19	2.13	2.87	3.78	4.39	3.38	4.4	0.57	-0.35657	0.457457	0.646737	0.227639	0.635051	0.817079	0.584209	0.219427	0.403513	0.657651	0.167373	0.393655	-0.117055	0.806832	0.95647	-0.0761649	0.87309	0.964254
Rg_000497	protein SHOOT GRAVITROPISM 6 [Sesamum indicum]	IPR016024_Armadillo-type fold	AT2G36810.2	.	ARM repeat superfamily protein	0.04	0.15	0.63	0.96	0.55	0.93	0.61	0.78	1.37	0.47	0.08	0.12	0.35	0.93	0.14	0.44	0.63	0.16	0.268325	0.723434	0.856615	0.797772	0.292434	0.512028	0.529447	0.473048	0.665193	-0.827815	0.27259	0.536986	-0.427085	0.56877	0.828172	-0.90174	0.228234	0.457999
Rg_000498	histone-lysine n-methyltransferase smyd3 [Phtheirospermum japonicum]	IPR001214_SET domain	AT1G33400.3	TPR9	Tetratricopeptide repeat (TPR)-like superfamily protein	1.35	3.76	7.18	7.63	6.72	6.43	10.12	9.65	7.6	6.28	5.32	6.29	11.95	8.79	8.95	12.06	17.6	1.3	-0.918861	9.79001e-06	0.00014113	-0.264448	0.202176	0.402232	0.654413	0.00143788	0.00908264	0.702049	0.000657936	0.00481594	0.626373	0.00241105	0.020733	0.364598	0.0763104	0.214124
Rg_000499	probable mediator of RNA polymerase ii transcription subunit 26c [Phtheirospermum japonicum]	IPR017923_Transcription factor IIS, N-terminal; IPR035441_TFIIS/LEDGF domain superfamily; IPR001025_Bromo adjacent homology (BAH) domain; IPR003617_Transcription elongation factor, TFIIS/CRSP70, N-terminal, sub-type	AT3G48050.2	SUO	protein SUO	0.82	3.21	7.63	11.65	13.14	12.81	9.41	10.82	6.51	5.01	6.27	5.81	13.43	13.31	12.13	9.15	16.09	1.67	0.209171	0.113859	0.250845	-0.0546614	0.683184	0.849482	-0.263832	0.038619	0.118298	-0.255691	0.047462	0.161094	-0.325386	0.0118587	0.0715281	-0.103894	0.412589	0.658237
Rg_000500	PREDICTED: paladin [Erythranthe guttata]	IPR029021_Protein-tyrosine phosphatase-like	AT3G62010.1	.	metal ion-binding protein	0.77	3.23	6.59	15.67	12.72	14.27	11.12	11.13	11.42	10.12	10.29	8.42	15.35	14.46	15.06	10.77	16.51	1.96	0.485836	0.00662521	0.0295182	0.426103	0.0177022	0.0700267	-0.0597332	0.731202	0.865128	0.33933	0.0509947	0.170185	-0.334186	0.0569522	0.220361	-0.0677921	0.696329	0.869446
Rg_000501	oxysterol-binding protein-related protein 1D [Sesamum indicum]	IPR000648_Oxysterol-binding protein; IPR037239_Oxysterol-binding protein superfamily; IPR001849_Pleckstrin homology domain	AT1G13170.1	ORP1D	OSBP(oxysterol binding protein)-related protein 1D	1.3	7.68	19.51	28.03	22.96	23.8	13.38	15.33	8.25	5.58	9.51	10.25	21.85	18.59	13.51	19.37	32.02	3.25	0.0529292	0.829324	0.92268	-0.735798	0.00283804	0.0166085	-0.788728	0.00127442	0.0082417	-0.684253	0.00526212	0.0281268	-0.29526	0.227767	0.525575	-0.624334	0.010668	0.0463635
Rg_000502	condensin complex subunit 2 [Sesamum indicum]	IPR022816_Condensin complex subunit 2/barren	AT2G32590.1	EMB2795	condensin complex subunit	0	0.06	0.21	0.12	0.19	0	0.07	0.04	0	1.59	1.14	1.38	4.28	4.32	2.23	0.47	0.49	0.03	-0.92128	0.252965	0.438551	-2.18834	0.0167363	0.0670549	-1.26706	0.156172	0.320023	4.66187	1.45831e-10	3.90361e-09	1.6916	0.0252441	0.124326	4.97983	6.67597e-12	2.10151e-10
Rg_000503	U4/U6-associated splicing factor PRP4 [Handroanthus impetiginosus]	.	AT3G25840.2	.	Protein kinase superfamily protein	0.07	0.53	1.27	1.13	0.89	0.88	0.51	0.69	0.46	0.76	0.68	0.28	2.06	1.68	1.06	1.43	2.69	0.15	-0.743962	0.0602844	0.157884	-1.30019	0.00140975	0.00937894	-0.556232	0.162685	0.329406	0.171361	0.663519	0.868766	0.563045	0.14838	0.409358	0.576357	0.134263	0.320129
Rg_000504	hypothetical protein PHJA_000239800 [Phtheirospermum japonicum]	.	AT3G50380.2	.	vacuolar protein sorting-associated protein, putative (DUF1162)	0.08	0.23	0.56	0.92	1.16	1.06	0.39	0.59	1.21	0.68	1.1	0.45	2.5	2.55	2.21	0.94	1.59	0.09	0.322909	0.494118	0.67907	0.132238	0.781615	0.91404	-0.190672	0.673946	0.824498	0.360573	0.424809	0.691696	-0.296738	0.518376	0.794683	1.04852	0.0182839	0.0716144
Rg_000505	callose synthase 10 [Sesamum indicum]	IPR003440_Glycosyl transferase, family 48; IPR026899_1,3-beta-glucan synthase subunit FKS1-like, domain-1	AT2G36850.1	GSL8	glucan synthase-like 8	1.77	11.42	26.08	44.2	35.77	39.31	33.5	35.61	25.25	10.95	12.07	10.98	26.41	26.87	26.12	15.84	44.03	3.67	0.247972	0.320399	0.512758	0.159377	0.523396	0.732133	-0.0885957	0.721428	0.858734	-0.91088	0.000259207	0.00213192	-0.809918	0.00116094	0.0114728	-0.726911	0.0034773	0.018336
Rg_000506	polyprotein [Broad bean wilt virus 2]	IPR001205_RNA-directed RNA polymerase, C-terminal domain; IPR000199_Peptidase C3A/C3B, picornaviral; IPR009003_Peptidase S1, PA clan; IPR000605_Helicase, superfamily 3, single-stranded DNA/RNA virus; IPR004004_Helicase/polymerase/peptidase polyprotein, Calicivirus-type	.	.	.	0.64	0	0	2201.46	0	0	0	0	0	2766.41	0	0	10380.8	0	0	29321	0	0	8.06773	NA	NA	-23.7083	NA	NA	-31.7761	NA	NA	1.5465	NA	NA	3.8547	NA	NA	2.11358	NA	NA
Rg_000507	putative dehydrogenase [Handroanthus impetiginosus]	IPR008927_6-phosphogluconate dehydrogenase-like, C-terminal domain superfamily; IPR036291_NAD(P)-binding domain superfamily; IPR006115_6-phosphogluconate dehydrogenase, NADP-binding; IPR029154_3-hydroxyisobutyrate dehydrogenase, NAD-binding domain	AT1G18270.4	.	ketose-bisphosphate aldolase class-II family protein	0.04	0.25	0.08	0.49	0.21	0.63	0.35	0.47	0.67	0.19	0.08	0.14	0.46	0.21	0.55	0.27	0.45	0.08	-0.0229456	0.974032	1	0.431543	0.540234	0.74643	0.454489	0.502074	0.690213	-0.802815	0.256959	0.517939	-0.370335	0.595021	0.845069	-0.273472	0.689689	0.865171
Rg_000508	PREDICTED: uncharacterized protein LOC105968879 [Erythranthe guttata] EYU27879.1 hypothetical protein MIMGU_mgv1a012682mg [Erythranthe guttata]	IPR006015_Universal stress protein A family; IPR006016_UspA	AT1G11360.4	.	Adenine nucleotide alpha hydrolases-like superfamily protein	0.06	0.15	0.28	1.18	0.96	1.08	1.39	1.26	0.34	0.1	0.34	0.37	0.33	0.33	0.41	0.63	0.79	0.08	1.01404	0.0301747	0.0945434	1.09928	0.0193813	0.0750141	0.0852477	0.842006	0.931209	-1.1315	0.0124872	0.0570395	-0.927149	0.0382454	0.167038	-1.70797	0.000171428	0.00137996
Rg_000509	protein FORGETTER 1 isoform X1 [Sesamum indicum]	IPR019787_Zinc finger, PHD-finger; IPR001965_Zinc finger, PHD-type; IPR027417_P-loop containing nucleoside triphosphate hydrolase; IPR039187_Strawberry notch, AAA domain; IPR011011_Zinc finger, FYVE/PHD-type; IPR026937_Strawberry notch, helicase C domain	AT1G79350.1	EMB1135	RING/FYVE/PHD zinc finger superfamily protein	1.94	7.47	17.13	37.86	35.52	31.78	38.61	38.16	32.5	8.87	8.81	11.25	21.11	20.17	20.8	27.44	51.8	4.18	0.490069	0.00296775	0.0156964	0.810765	8.95156e-07	1.6784e-05	0.320696	0.0482042	0.139351	-0.954138	6.23011e-09	1.32396e-07	-0.254781	0.118601	0.35694	-0.900408	3.52839e-08	6.29826e-07
Rg_000510	hypothetical protein GIB67_021730 [Kingdonia uniflora] KAF6145475.1 hypothetical protein GIB67_020724 [Kingdonia uniflora] KAF6151617.1 hypothetical protein GIB67_012976 [Kingdonia uniflora] KAF6151620.1 hypothetical protein GIB67_012979 [Kingdonia uniflora] KAF6165009.1 hypothetical protein GIB67_010865 [Kingdonia uniflora]	IPR007081_RNA polymerase Rpb1, domain 5	ATCG00170.1	RPOC2	DNA-directed RNA polymerase family protein	0	0.19	0.16	0.27	0.13	0.3	0.25	0.24	0.37	0.13	0.07	0.22	0.41	0.59	0.28	0.31	0.72	0.09	-0.533491	0.431462	0.6235	0.0425271	0.949774	1	0.576018	0.373828	0.574068	0.219844	0.741439	0.913426	0.895852	0.167856	0.440131	0.695061	0.280347	0.522575
Rg_000511	RNA-directed DNA polymerase (reversetranscriptase)-related family protein [Striga asiatica]	IPR026960_Reverse transcriptase zinc-binding domain; IPR000477_Reverse transcriptase domain; IPR036691_Endonuclease/exonuclease/phosphatase superfamily	AT1G43760.1	.	DNAse I-like superfamily protein	0	0	0	0.68	1.25	0.86	0	0.23	9.15	0.81	0.78	0.93	1.8	1.77	2.02	1.58	1.73	0.15	7.22425	NA	NA	9.51384	NA	NA	2.28959	NA	NA	0.749572	NA	NA	0.386694	NA	NA	0.851588	NA	NA
Rg_000512	DNA ligase 6 isoform X3 [Sesamum indicum]	IPR011084_DNA repair metallo-beta-lactamase; IPR036866_Ribonuclease Z/Hydroxyacylglutathione hydrolase-like	AT1G66730.1	LIG6	DNA LIGASE 6	0.02	0.1	0.56	1.02	0.73	0.75	1.12	1.18	1.11	0.34	0.1	0.22	0.9	0.55	0.85	0.79	1.05	0.15	0.627932	0.182457	0.351469	1.34747	0.00405098	0.0220245	0.719539	0.093901	0.224303	-0.929823	0.0437854	0.151639	-0.0513079	0.90767	0.994017	-0.260986	0.551342	0.771184
Rg_000513	hypothetical protein PHJA_002133500 [Phtheirospermum japonicum]	IPR005635_Inner centromere protein, ARK-binding domain	AT5G55820.9	WYR	inner centromere protein, ARK-binding region protein	0.17	0.51	1.32	4.35	2.76	3.03	1.42	1.7	1.45	0.4	0.35	0.84	1.68	1.36	1.55	1.53	4.5	0.28	0.806423	0.0184691	0.0653068	-0.066472	0.848524	0.956682	-0.872895	0.00847711	0.0374112	-1.74637	4.36615e-07	6.70707e-06	-0.659726	0.0477417	0.195319	-1.2767	0.000131359	0.0010897
Rg_000514	putative leucine-rich repeat-containing protein DDB_G0290503 [Sesamum indicum]	IPR011684_Protein Networked (NET), actin-binding (NAB) domain	AT5G41790.2	CIP1	COP1-interactive protein 1	0	0.25	0	0.41	0	0.21	1.58	0.74	0	0.3	0	0	0.34	0	0.66	0.53	0.23	0.22	-0.510796	0.848878	0.933348	1.59526	0.550898	0.755544	2.10606	0.429225	0.627071	0.0717304	0.978615	1	1.77552	0.505452	0.785143	0.629818	0.813409	0.935182
Rg_000515	transposable element gene, partial [Prunus dulcis]	IPR025724_GAG-pre-integrase domain; IPR012337_Ribonuclease H-like superfamily; IPR013103_Reverse transcriptase, RNA-dependent DNA polymerase; IPR001584_Integrase, catalytic core	AT4G23160.3	CRK8	cysteine-rich RECEPTOR-like kinase	0	0	0.06	0.32	0	0	0	0	0	0	0	0	3.44	2.39	4.15	0.25	0.14	0	1.49579	0.617623	0.777522	-3.49209	0.275939	0.493427	-4.98788	0.108418	0.248357	-4.54105	0.143869	0.356036	0.216779	0.940425	1	4.91635	0.0873421	0.235694
Rg_000516	nuclear pore complex protein NUP205 isoform X1 [Sesamum indicum]	IPR021827_Nucleoporin Nup186/Nup192/Nup205	AT5G51200.2	EMB3142	nuclear pore complex protein (DUF3414)	1.07	4.94	9.8	14.03	14.63	14.23	14.67	16.54	9.33	3.87	3.74	4.26	6.08	6.08	6.3	6.25	12.37	1.61	-0.0567041	0.771893	0.889904	0.0853326	0.663228	0.8359	0.142037	0.461143	0.655027	-0.949644	1.32016e-06	1.84832e-05	-0.823574	2.65624e-05	0.000481418	-1.36097	3.78737e-12	1.23279e-10
Rg_000517	hypothetical protein LSAT_6X94260 [Lactuca sativa]	.	.	.	.	0.24	1.56	2.68	1.93	2.17	2.53	0.85	0.79	0.7	1.16	2.27	1.84	3.96	3.36	2.6	3.13	5.62	0.64	-0.910418	0.000382351	0.00299584	-2.17069	1.86439e-15	2.03981e-13	-1.26027	2.73434e-06	4.58548e-05	0.518224	0.0410401	0.144217	0.691048	0.0062381	0.0436358	0.411322	0.101515	0.262898
Rg_000518	small subunit processome component 20 homolog [Sesamum indicum]	IPR016024_Armadillo-type fold; IPR011430_Down-regulated-in-metastasis protein	AT4G30990.3	.	ARM repeat superfamily protein	1.44	5.94	11.59	11.39	12.85	11.11	13.39	15.2	8.65	4.42	8.87	6.25	17.81	15.95	15.54	9.34	14.4	1.8	-0.637278	0.000102272	0.00100706	-0.337368	0.0399754	0.129113	0.299911	0.0640367	0.170929	-0.00328952	0.983955	1	-0.247692	0.132077	0.381868	0.328206	0.0423879	0.137448
Rg_000519	PREDICTED: LOW QUALITY PROTEIN: callose synthase 5 [Erythranthe guttata]	IPR026899_1,3-beta-glucan synthase subunit FKS1-like, domain-1; IPR003440_Glycosyl transferase, family 48; IPR039431_Vta1/callose synthase, N-terminal	AT2G13680.1	CALS5	callose synthase 5	0.09	0.25	0.76	1.68	1.7	1.61	1.94	1.84	1.81	0.47	0.35	0.24	13.38	35.14	14.75	0.81	0.75	0.24	0.681677	0.13713	0.287176	1.11897	0.0146724	0.0605282	0.43729	0.315932	0.514634	-1.31463	0.00402427	0.0225358	-0.895127	0.046921	0.193056	3.52828	2.46069e-16	1.36106e-14
Rg_000520	putative E3 ubiquitin-protein ligase LIN isoform X1 [Sesamum indicum] XP_020551064.1 putative E3 ubiquitin-protein ligase LIN isoform X1 [Sesamum indicum]	IPR003613_U box domain; IPR036322_WD40-repeat-containing domain superfamily; IPR020472_G-protein beta WD-40 repeat; IPR001680_WD40 repeat; IPR016024_Armadillo-type fold	AT4G21350.1	PUB8	plant U-box 8	0.88	2.11	7.09	13.62	9.94	11.85	6.47	8.66	7.02	0.21	0.62	0.35	1.13	0.68	1.18	1	0	0.03	0.311142	0.678862	0.82455	-0.0963047	0.898088	0.987422	-0.407447	0.587141	0.758055	-4.06849	1.03698e-07	1.79107e-06	-4.89643	2.93756e-10	1.75076e-08	-3.70821	9.92719e-07	1.34246e-05
Rg_000521	ribonuclease H [Trifolium pratense]	IPR036691_Endonuclease/exonuclease/phosphatase superfamily; IPR026960_Reverse transcriptase zinc-binding domain; IPR002156_Ribonuclease H domain; IPR000477_Reverse transcriptase domain; IPR012337_Ribonuclease H-like superfamily; IPR005135_Endonuclease/exonuclease/phosphatase	AT3G09510.1	.	Ribonuclease H-like superfamily protein	0.35	1.89	4.95	0.18	0.32	0.18	2.67	2.47	0	0.08	0.1	0.04	0.67	0.3	0.32	0.43	0.4	0.03	-4.74931	1.43968e-07	3.90843e-06	-1.70472	0.0537778	0.160139	3.04459	0.000756238	0.00536611	-0.770108	0.425302	0.692164	0.403877	0.664292	0.886517	0.754456	0.410487	0.656303
Rg_000522	hypothetical protein C6B38_08730 [Spiroplasma sp. ChiS]	IPR000477_Reverse transcriptase domain; IPR036691_Endonuclease/exonuclease/phosphatase superfamily; IPR026960_Reverse transcriptase zinc-binding domain	AT3G24255.5	.	RNA-directed DNA polymerase (reverse transcriptase)-related family protein	0.33	0.56	1.34	2.95	2.86	2.08	1.47	2.41	2.09	0.53	0.54	0.74	0.93	1.08	1.16	2.85	1.96	0.28	0.0582746	0.870786	0.94548	-0.0645099	0.857986	0.962478	-0.122784	0.725795	0.861387	-1.20721	0.000882437	0.00621891	-0.404977	0.253627	0.558016	-1.43809	6.32309e-05	0.000570302
Rg_000523	protein TSS [Sesamum indicum]	IPR028275_Clustered mitochondria protein, N-terminal	AT1G15290.1	.	Tetratricopeptide repeat (TPR)-like superfamily protein	0	0	0	0.03	0.01	0	0.05	0.06	0.11	0.1	0.03	0	0	0.08	0.24	0.06	0.12	0	1.06976	0.60773	0.77027	3.87721	0.0462445	0.143435	2.80745	0.110141	0.251014	2.69088	0.129221	0.331866	2.0675	0.251236	0.555258	2.95108	0.0919668	0.244804
Rg_000524	dedicator of cytokinesis protein 8 [Phtheirospermum japonicum]	IPR010703_Dedicator of cytokinesis, C-terminal; IPR027007_DHR-1 domain; IPR016024_Armadillo-type fold	AT4G16340.2	SPK1	guanyl-nucleotide exchange factors;GTPase binding;GTP binding protein	1.76	6.82	16.79	24.79	23.99	24.09	22.32	23.07	17.09	6.53	6.47	8.82	14.99	13.31	13.53	25.6	41.52	3.06	0.0611598	0.733895	0.864252	0.0868965	0.62974	0.813292	0.0257367	0.884956	0.955195	-0.837412	3.20859e-06	4.1547e-05	-0.0111536	0.950167	1	-0.948825	1.15605e-07	1.87679e-06
Rg_000525	hypothetical protein MIMGU_mgv1a019692mg [Erythranthe guttata]	IPR036890_Histidine kinase/HSP90-like ATPase superfamily	AT5G24280.2	GMI1	gamma-irradiation and mitomycin c induced 1	0	0.46	0.29	3.48	3.62	3.49	0.14	1.59	0.31	0.68	1.32	1.38	1.93	1.86	0.58	2.27	2.02	0.7	2.32647	0.00460429	0.0221974	0.0907112	0.912915	0.995796	-2.23576	0.00558021	0.0269584	-0.782484	0.328864	0.599195	-0.427718	0.593151	0.843816	-1.45088	0.0704257	0.201855
Rg_000526	PREDICTED: uncharacterized protein LOC105956976 [Erythranthe guttata]	IPR036691_Endonuclease/exonuclease/phosphatase superfamily; IPR005135_Endonuclease/exonuclease/phosphatase; IPR000477_Reverse transcriptase domain	AT4G29090.1	.	Ribonuclease H-like superfamily protein	0.13	0.37	1.17	2.52	1.69	2.54	0.73	0.96	0	0.24	0.51	0.28	0.5	0.63	0.32	3.46	5.17	0.28	0.565307	0.397219	0.591145	-1.31221	0.0535192	0.159596	-1.87752	0.00499374	0.0247154	-1.86654	0.0055758	0.0295279	0.357276	0.587207	0.83973	-2.38358	0.000401389	0.00289466
Rg_000527	uncharacterized protein LOC105158471, partial [Sesamum indicum]	.	AT5G43310.5	.	COP1-interacting protein-like protein	0.07	0.42	0.72	0.7	1.2	0.86	0.26	0.19	0.35	0.35	0.4	0.41	0.91	0.62	0.56	1.73	3.27	0.29	-0.318871	0.368257	0.562007	-1.84172	2.45921e-06	4.07235e-05	-1.52285	4.91323e-05	0.00054704	-0.369692	0.298139	0.566261	1.03446	0.00202201	0.0179459	-0.576303	0.0988124	0.257925
Rg_000528	methyl-cpg-binding domain-containing protein 9 [Phtheirospermum japonicum]	IPR028942_WHIM1 domain	AT3G01460.1	MBD9	methyl-CPG-binding domain 9	0.25	1.18	1.69	2.3	2.27	2.28	1.31	2.76	0.48	0.66	1.53	1	3.03	2.15	2.3	3.6	3.73	0.35	-0.478922	0.224568	0.4053	-0.915391	0.0216071	0.0813618	-0.436469	0.265997	0.458142	-0.262206	0.505703	0.75891	0.270236	0.489391	0.774669	-0.0322712	0.933985	0.991872
Rg_000529	Retrovirus-related Pol polyprotein from transposon TNT 1-94 [Cajanus cajan]	.	AT4G23160.3	CRK8	cysteine-rich RECEPTOR-like kinase	0.16	0.55	0.84	0.96	1.42	1.31	0.55	0.72	1.02	0.49	0.7	0.65	1.02	0.89	0.87	0.9	1.75	0.19	-0.402285	0.229595	0.411276	-0.812082	0.0179726	0.0708164	-0.409797	0.215021	0.398104	-0.138226	0.677704	0.877477	-0.21519	0.518531	0.794785	-0.571563	0.0845879	0.230309
Rg_000530	protein TSS [Sesamum indicum]	IPR028275_Clustered mitochondria protein, N-terminal; IPR011990_Tetratricopeptide-like helical domain superfamily; IPR019734_Tetratricopeptide repeat; IPR033646_CLU central domain	AT1G15290.1	.	Tetratricopeptide repeat (TPR)-like superfamily protein	0.76	0.5	18.58	545.5	437.06	21.35	35.29	190.57	20.66	699.46	423.58	25.51	164.46	151.31	35.3	128.67	70.11	2.09	4.63283	4.40366e-05	0.000500931	2.75333	0.015192	0.0621665	-1.8795	0.0971745	0.229785	1.19356	0.292158	0.559512	-2.36983	0.036499	0.161861	-1.64186	0.147338	0.341652
Rg_000531	PREDICTED: uncharacterized protein LOC105971639 [Erythranthe guttata]	IPR036890_Histidine kinase/HSP90-like ATPase superfamily	AT5G24280.2	GMI1	gamma-irradiation and mitomycin c induced 1	0	0.19	0.46	2.64	3.15	1.9	0.8	2.1	0.63	0.64	1.69	0.82	1.08	0.38	0.86	1.42	2.5	0.24	2.30641	1.91922e-05	0.000248215	1.37278	0.0117477	0.0508642	-0.933624	0.0621136	0.167306	-0.449038	0.369089	0.640519	-0.741102	0.140102	0.394881	-1.8807	0.000211648	0.00165977
Rg_000532	RNA binding protein [Striga asiatica]	IPR013170_mRNA splicing factor Cwf21 domain	AT5G25060.1	RRC1	RNA recognition motif (RRM)-containing protein	0.04	0.38	0.99	0.35	0.86	0.45	1.19	0.93	0.58	0.35	0.65	0.75	1.12	0.55	0.67	0.41	1.92	0.21	-1.01406	0.0580451	0.153506	-0.121626	0.818764	0.937459	0.892439	0.0881761	0.214735	0.907645	0.0849185	0.24763	0.796234	0.131842	0.381699	0.301853	0.567393	0.782718
Rg_000533	probable mediator of RNA polymerase ii transcription subunit 26c [Phtheirospermum japonicum]	IPR003617_Transcription elongation factor, TFIIS/CRSP70, N-terminal, sub-type; IPR017923_Transcription factor IIS, N-terminal; IPR001025_Bromo adjacent homology (BAH) domain; IPR035441_TFIIS/LEDGF domain superfamily	AT3G48050.2	SUO	protein SUO	0.69	2.54	5.53	9.47	9.22	10.34	9.38	9.53	5.69	3.87	5.47	3.79	10	9.72	9.98	5.88	11.57	1.15	0.205195	0.194605	0.367578	0.193075	0.225357	0.432682	-0.0121192	0.936512	0.984256	-0.273661	0.0766918	0.229974	-0.493167	0.00153675	0.0143414	-0.114229	0.452726	0.694016
Rg_000534	hypothetical protein C5H24_11650, partial [Xylella fastidiosa]	IPR005135_Endonuclease/exonuclease/phosphatase; IPR036691_Endonuclease/exonuclease/phosphatase superfamily; IPR000477_Reverse transcriptase domain	AT2G30390.1	FC2	ferrochelatase 2	0	0	0	0.67	0.76	0.68	0.1	0.12	0	0.4	1.31	0.36	1.43	0.88	0.82	1.28	1.13	0.25	6.7963	1.17337e-07	3.29293e-06	3.80186	0.00424627	0.0228417	-2.99443	1.81164e-06	3.2049e-05	0.783694	0.132748	0.338037	0.734674	0.159431	0.426791	0.403138	0.438337	0.681969
Rg_000535	protein NETWORKED 1A-like [Sesamum indicum]	IPR011684_Protein Networked (NET), actin-binding (NAB) domain	AT3G22790.1	NET1A	Kinase interacting (KIP1-like) family protein	1.27	3.89	12.32	31.82	30.15	30.31	12.71	14	10.33	2.93	2.23	4.86	8.9	9.14	10.29	26.57	42.81	2.53	0.972097	0.00106119	0.00689844	-0.0950494	0.74964	0.894482	-1.06715	0.000300671	0.00250757	-2.28589	1.76455e-14	7.69971e-13	-0.383405	0.193764	0.479238	-1.84204	4.90621e-10	1.1752e-08
Rg_000536	Retrovirus-related Pol polyprotein from transposon TNT 1-94 [Vitis vinifera]	IPR013103_Reverse transcriptase, RNA-dependent DNA polymerase	AT4G23160.3	CRK8	cysteine-rich RECEPTOR-like kinase	0.12	0.54	1.33	1.8	1.57	1.82	1.49	1.71	1.22	0.59	0.82	0.78	1.83	1.49	1.42	1.67	2.07	0.32	-0.0817579	0.695435	0.836366	-0.0701953	0.741384	0.889257	0.0115626	0.952505	0.993591	-0.357582	0.084034	0.245773	-0.101765	0.611269	0.855314	-0.288429	0.143076	0.33482
Rg_000537	protein TSS [Sesamum indicum]	IPR033646_CLU central domain; IPR019734_Tetratricopeptide repeat; IPR011990_Tetratricopeptide-like helical domain superfamily	AT4G28080.1	.	Tetratricopeptide repeat (TPR)-like superfamily protein	0	0	0.03	0.85	1.12	1.07	0	0.19	0.35	0.34	0.23	0.4	1.4	0.99	1.19	1.01	1.11	0.18	5.69898	9.86087e-07	2.00343e-05	3.5535	0.00266888	0.0158115	-2.14548	0.0022291	0.0129286	-0.742186	0.276928	0.541958	-0.118407	0.861009	0.979257	0.0643267	0.923608	0.986866
Rg_000538	hypothetical protein LSAT_6X94260 [Lactuca sativa]	.	.	.	.	0.07	0.1	0.28	0.42	0.23	0.15	0.31	0.19	0	0.22	0.4	0.2	0.56	0.47	0.22	0.44	0.78	0.1	-0.922385	0.152943	0.310734	-1.39727	0.0364251	0.120481	-0.47489	0.467843	0.660633	0.938694	0.135644	0.342908	0.963438	0.12552	0.370045	0.503598	0.422387	0.667563
Rg_000539	putative galacturonosyltransferase-like 4 [Glycine soja]	IPR005135_Endonuclease/exonuclease/phosphatase; IPR000477_Reverse transcriptase domain; IPR036691_Endonuclease/exonuclease/phosphatase superfamily	AT2G30390.1	FC2	ferrochelatase 2	0	0.03	0.04	0.09	0.1	0.09	0.42	0.16	0.3	0	0	0	0.18	0.08	0.06	0.24	0.26	0.03	0.791222	0.376821	0.570683	2.66314	0.00197852	0.0123703	1.87192	0.00507869	0.0250293	-4.4837	0.000829817	0.00588765	1.03677	0.138561	0.392205	-0.123627	0.866382	0.960933
Rg_000540	protein tplate [Phtheirospermum japonicum]	IPR016024_Armadillo-type fold	AT3G01780.1	TPLATE	ARM repeat superfamily protein	0.67	2.97	7.81	17.22	15.46	13.08	13.63	13.92	8.94	5.06	6.4	6.45	18.22	17.3	12.92	17.14	30.96	1.89	0.586619	0.00555862	0.0257188	0.502973	0.0177642	0.0702036	-0.0836456	0.686127	0.833769	-0.457901	0.0280475	0.107613	0.125214	0.546015	0.813882	-0.0642243	0.75613	0.904556
Rg_000541	hypothetical protein CDL12_20381 [Handroanthus impetiginosus]	.	AT5G22040.2	.	ubiquitin carboxyl-terminal hydrolase	0.13	0.37	0.87	1.81	1.67	1.69	0.78	0.91	0.58	1.15	0.69	0.72	1.58	1.55	1.16	1.27	1.89	0.28	0.335612	0.250116	0.435306	-0.617607	0.0434066	0.136959	-0.953219	0.000783495	0.00552529	-0.0754321	0.785562	0.936951	-0.310946	0.266518	0.573647	-0.422077	0.125179	0.305309
Rg_000542	cytochrome c oxidase subunit 1 [Citrullus lanatus] ACV96635.1 cytochrome c oxidase subunit 1 [Citrullus lanatus] QHD19706.1 cytochrome c oxidase subunit 1 [Hemiptelea davidii]	IPR000883_Cytochrome c oxidase subunit I; IPR014241_Cytochrome c oxidase, subunit I bacterial type; IPR036927_Cytochrome c oxidase-like, subunit I superfamily	ATMG01360.1	COX1	cytochrome oxidase	0.14	0.11	0.63	0.14	0.14	0.25	0.13	0.15	0.07	0.12	0.42	0.32	0.45	0.3	0.56	11.13	1.83	0.14	-2.45592	0.00281747	0.0150806	-2.73937	0.00113992	0.00788777	-0.283451	0.740443	0.871009	1.56143	0.0579208	0.187361	4.66849	7.0071e-09	3.18799e-07	1.20119	0.143674	0.335746
Rg_000543	PREDICTED: uncharacterized protein LOC105967373 [Erythranthe guttata]	IPR026960_Reverse transcriptase zinc-binding domain; IPR002156_Ribonuclease H domain; IPR012337_Ribonuclease H-like superfamily	AT4G29090.1	.	Ribonuclease H-like superfamily protein	0.29	0.9	2.03	3.47	3.52	3.63	1.33	1.88	0.1	0.58	0.48	0.56	1.65	1.3	1.82	2.7	4.7	0.54	0.159135	0.752621	0.8778	-1.39435	0.00650704	0.0320624	-1.55348	0.00214244	0.0125383	-1.79476	0.000452491	0.00347655	-0.221509	0.658711	0.883673	-1.29974	0.00988214	0.0435523
Rg_000544	Kinesin-like protein [Handroanthus impetiginosus]	IPR027417_P-loop containing nucleoside triphosphate hydrolase; IPR001752_Kinesin motor domain	AT3G12020.1	.	P-loop containing nucleoside triphosphate hydrolases superfamily protein	0.09	0	0.69	0.32	0.17	0.44	0	0.33	0	0	0	0	0.67	0.46	0.86	1.29	2.8	0.13	-1.20657	0.370493	0.564107	-2.63368	0.0555981	0.164129	-1.42711	0.298213	0.495115	-6.15352	0.000538945	0.00405295	2.10202	0.115889	0.351697	0.964855	0.47122	0.709152
Rg_000545	Alpha-amylase [Handroanthus impetiginosus]	IPR017853_Glycoside hydrolase superfamily; IPR006047_Glycosyl hydrolase, family 13, catalytic domain	AT1G69830.1	AMY3	alpha-amylase-like 3	0.17	0.53	0.59	2.55	2.29	4.12	5.65	5.74	2.88	11.84	6.85	12.83	2.09	2.46	2.5	4.64	6.64	1.32	0.980141	0.0194301	0.0678123	1.85093	9.70187e-06	0.00013553	0.870789	0.0296213	0.0969715	2.73513	6.74313e-12	2.16647e-10	0.919129	0.0220011	0.112932	-0.495245	0.220495	0.447591
Rg_000546	hypothetical protein F511_15782 [Dorcoceras hygrometricum]	.	AT4G23160.3	CRK8	cysteine-rich RECEPTOR-like kinase	0.02	0.05	0.05	0.45	0.25	0.44	0.06	0.23	0.07	0.37	0.21	0.25	0.39	0.46	0.29	0.31	0.43	0.02	1.35169	0.0340021	0.103444	-0.0677811	0.921076	1	-1.41947	0.0144206	0.0565566	0.51209	0.334105	0.604776	-0.549435	0.324496	0.636876	-0.134655	0.800531	0.928442
Rg_000547	type I inositol 1,4,5-trisphosphate 5-phosphatase 12 [Catalpa bungei]	IPR011124_Zinc finger, CW-type	AT3G62900.2	.	CW-type Zinc Finger	1.01	3.57	6.41	9.47	10.43	9.51	10.64	14.58	9.56	4.01	7.81	5.02	9.77	10.51	9.83	8.57	15.01	1.28	-0.19334	0.272311	0.461158	0.28734	0.102605	0.25378	0.48068	0.00509551	0.0250956	0.0489339	0.778113	0.932999	-0.148317	0.395286	0.702334	-0.111212	0.519484	0.746932
Rg_000548	B-box zinc finger protein 20 [Sesamum indicum]	.	AT4G39070.1	BZS1	B-box zinc finger family protein	0.07	0.38	1.04	3.26	2.8	3.15	1.13	2.03	0.6	1.53	2.02	1.78	3.99	4.36	2.9	3.74	5.42	0.46	1.22042	3.64305e-05	0.000427367	0.126034	0.679266	0.84716	-1.09439	7.90277e-05	0.00082245	0.0966265	0.721163	0.902377	0.161457	0.550621	0.816746	0.137053	0.608783	0.812975
Rg_000549	hypothetical protein [Capsicum annuum fabavirus]	IPR003181_Large coat protein	AT4G20190.1	.	hypothetical protein	0.01	0.02	0.1	0.35	0.73	0.27	0.52	0.44	0.14	0.33	0.12	0.12	0.36	0.04	0.11	0.37	0.31	0.05	2.16474	0.0106046	0.0426313	2.07594	0.0148534	0.0611213	-0.0888005	0.901279	0.964212	-0.263636	0.716437	0.899634	-0.703629	0.339241	0.651814	-1.68913	0.0246316	0.0904937
Rg_000550	proteasome activator subunit 4 [Catalpa bungei]	IPR016024_Armadillo-type fold; IPR032430_Proteasome activator Blm10, mid region; IPR021843_Proteasome activator complex subunit 4 C-terminal domain	AT3G13330.1	PA200	proteasome activating protein 200	1.03	4	10.95	25.3	18.94	22.66	22.94	22.1	18.93	16.05	32.64	18.55	25.93	29.16	25.5	14.31	29.51	2.79	0.640416	0.00239292	0.0132301	0.842032	6.62719e-05	0.000716556	0.201616	0.330651	0.530184	0.863584	3.03466e-05	0.000314983	-0.381528	0.067289	0.246509	0.130293	0.529494	0.754332
Rg_000551	protein MEI2-like 2 [Sesamum indicum] XP_011082914.1 protein MEI2-like 2 [Sesamum indicum]	IPR007201_Mei2/Mei2-like, C-terminal RNA recognition motif; IPR000504_RNA recognition motif domain; IPR035979_RNA-binding domain superfamily	AT1G29400.2	ML5	MEI2-like protein 5	0.04	0.16	0.17	0.32	0.67	0.6	0.15	0.28	0.13	0.2	0.57	0.55	0.81	0.47	1.06	0	0.29	0.06	0.401118	0.567646	0.739239	-0.88866	0.222818	0.42946	-1.28978	0.063513	0.169914	0.556154	0.405959	0.674683	-1.58522	0.0272324	0.131329	0.40048	0.547528	0.768441
Rg_000552	putative dehydrogenase [Handroanthus impetiginosus]	IPR000771_Fructose-bisphosphate aldolase, class-II; IPR031475_Nucleotide-binding C-terminal domain	AT1G18270.2	.	ketose-bisphosphate aldolase class-II family protein	0	0.23	0.2	1.24	1.65	1.48	2.19	3.16	1.16	0.32	0	0.68	0	0.3	0.37	0.78	1.44	0.08	1.92089	0.089181	0.210251	2.68131	0.0176062	0.0697511	0.76042	0.489145	0.679194	-1.16908	0.291606	0.558822	-0.960777	0.385686	0.693337	-2.76181	0.0137661	0.0571879
Rg_000553	uncharacterized protein LOC105164707 [Sesamum indicum]	IPR011990_Tetratricopeptide-like helical domain superfamily	AT4G32820.1	.	Tetratricopeptide repeat (TPR)-like superfamily protein	0.02	0.36	0.13	0.76	1.39	0.59	0	0.27	0.23	0.62	0.51	0.35	0.89	1.05	0.61	0.38	1.12	0.2	0.68577	0.399234	0.593176	-1.48389	0.0787535	0.210848	-2.16966	0.00819333	0.0363919	0.0367026	0.96312	1	-0.261548	0.74275	0.927416	-0.252059	0.750345	0.901369
Rg_000554	pentatricopeptide repeat-containing protein At4g02750-like [Sesamum indicum]	IPR002885_Pentatricopeptide repeat; IPR011990_Tetratricopeptide-like helical domain superfamily	AT5G23530.1	CXE18	carboxyesterase 18	0.25	0.87	2.1	4.35	3.64	5.07	3.65	4.64	1.69	3.49	2.23	3.41	15.12	13.05	10.95	17.09	26.31	0.89	0.52866	0.186914	0.357422	0.32904	0.413093	0.634621	-0.19962	0.611391	0.777298	0.408654	0.297571	0.565759	1.61526	3.5048e-05	0.000609723	1.42364	0.000261324	0.00199313
Rg_000555	monodehydroascorbate reductase 4, peroxisomal [Sesamum indicum]	IPR036188_FAD/NAD(P)-binding domain superfamily; IPR023753_FAD/NAD(P)-binding domain; IPR016156_FAD/NAD-linked reductase, dimerisation domain superfamily	AT3G27820.1	MDAR4	monodehydroascorbate reductase 4	0.02	0.02	0.17	2.51	2.5	2.82	0.4	1.08	0.09	1.33	1.55	1.09	2.93	2.55	1.59	2.31	2.17	0.25	3.90418	1.32397e-10	9.27949e-09	1.73029	0.00542287	0.0277564	-2.17389	1.76673e-05	0.000228968	-0.0891549	0.856117	0.972169	-0.560676	0.257076	0.562184	-0.310203	0.527078	0.752564
Rg_000556	clathrin heavy chain 2 [Sesamum indicum]	IPR016024_Armadillo-type fold; IPR015348_Clathrin, heavy chain, linker, core motif; IPR000547_Clathrin, heavy chain/VPS, 7-fold repeat; IPR016025_Clathrin heavy chain, N-terminal; IPR022365_Clathrin, heavy chain, propeller repeat; IPR016341_Clathrin, heavy chain	AT3G11130.1	.	Clathrin, heavy chain	3.39	14.45	36.46	54.56	52.52	47.65	38.27	43.07	34.33	14.64	22.86	21.46	64.06	55.28	50.51	53.14	116.69	6.44	0.0900833	0.676737	0.822983	-0.0693288	0.748552	0.893692	-0.159412	0.459003	0.653292	-0.515398	0.0168794	0.0722812	0.143925	0.503949	0.784286	-0.0142911	0.947046	0.997852
Rg_000557	Kinesin-like protein [Handroanthus impetiginosus]	IPR027417_P-loop containing nucleoside triphosphate hydrolase; IPR001752_Kinesin motor domain	AT3G12020.1	.	P-loop containing nucleoside triphosphate hydrolases superfamily protein	0	0.38	0.58	0.35	1.3	0.47	0.7	0.52	0.53	0.58	0.49	0.87	3.99	4.37	2.57	2.82	2.69	0.07	-0.109748	0.882424	0.952409	-0.146253	0.844439	0.953853	-0.0365054	0.960084	0.997832	0.766754	0.29117	0.558379	1.23484	0.0881708	0.294616	2.19048	0.00233139	0.0131138
Rg_000558	hypothetical protein [Capsicum annuum fabavirus]	IPR003181_Large coat protein	AT1G31970.1	STRS1	DEA(D/H)-box RNA helicase family protein	0.38	1.11	3.6	9.1	4.08	3.89	3.16	4.33	3.59	5.02	3.32	2.51	12.38	4.33	4.12	9.97	6.32	0.52	0.276048	0.582505	0.751173	-0.0467742	0.925955	1	-0.322822	0.517326	0.702213	0.316187	0.525605	0.774749	0.0630898	0.899345	0.991968	0.137611	0.782149	0.918323
Rg_000559	polyprotein [Broad bean wilt virus 2]	IPR000477_Reverse transcriptase domain; IPR003181_Large coat protein; IPR026960_Reverse transcriptase zinc-binding domain	AT4G29090.1	.	Ribonuclease H-like superfamily protein	0.04	0.15	0	1.29	0.85	1.18	1.46	0.94	2.03	0.06	0.09	0.05	0.44	0.34	0.22	0.36	0.67	0.11	1.85065	0.0112556	0.0446685	2.61679	0.000330867	0.00282152	0.766146	0.255485	0.446362	-3.12344	3.95187e-05	0.000398625	-1.21767	0.0796554	0.275488	-1.91948	0.00594307	0.0286337
Rg_000560	lipoxygenase 6 chloroplastic [Phtheirospermum japonicum]	IPR036226_Lipoxigenase, C-terminal domain superfamily; IPR036392_PLAT/LH2 domain superfamily; IPR013819_Lipoxygenase, C-terminal; IPR001024_PLAT/LH2 domain; IPR001246_Lipoxygenase, plant	AT1G67560.1	LOX6	PLAT/LH2 domain-containing lipoxygenase family protein	0.2	0.55	1.82	6.09	6.65	6.86	4.56	8.34	2.46	1.08	0.43	0.92	3.26	1.85	2.37	1.57	4.68	0.68	1.47849	0.000880659	0.00592285	1.29501	0.00363976	0.020253	-0.183478	0.671928	0.823084	-2.06495	3.10269e-06	4.03089e-05	-1.16722	0.00763561	0.0511895	-1.55448	0.000371306	0.00270514
Rg_000561	Heterogeneous nuclear ribonucleoprotein R (RRM superfamily) [Handroanthus impetiginosus]	IPR035979_RNA-binding domain superfamily; IPR000504_RNA recognition motif domain	AT2G44710.4	.	RNA-binding (RRM/RBD/RNP motifs) family protein	1.03	2.81	5.62	9.55	8.35	9.35	6.88	7.67	4.71	4.67	8.05	5.17	13.18	11.82	10.12	10.81	14	1.58	-0.12356	0.438671	0.629734	-0.38889	0.0160326	0.0648338	-0.265331	0.0890465	0.216195	0.257213	0.0983764	0.274502	0.129962	0.405344	0.710503	0.214184	0.165014	0.369363
Rg_000562	PREDICTED: metacaspase-3-like [Erythranthe guttata]	0	AT1G02170.1	MC1	metacaspase 1	0	0.03	0	0.2	0.31	0.29	0.18	0.25	0.06	0.27	0.48	0.32	0.4	0.4	0.72	0.35	0.15	0.17	2.73934	0.00825702	0.0351096	2.27614	0.0303443	0.105107	-0.463199	0.546529	0.725671	1.28707	0.0830461	0.243832	0.823439	0.271958	0.579761	0.803926	0.278755	0.520536
Rg_000563	probable mediator of RNA polymerase ii transcription subunit 26c [Phtheirospermum japonicum]	IPR017923_Transcription factor IIS, N-terminal; IPR035441_TFIIS/LEDGF domain superfamily; IPR001025_Bromo adjacent homology (BAH) domain; IPR003617_Transcription elongation factor, TFIIS/CRSP70, N-terminal, sub-type	AT3G48050.2	SUO	protein SUO	1.07	4.21	8.52	16.22	16.37	15.11	15.63	16.65	11	5.54	7.62	6.52	15.86	15.19	15.46	10.5	17.84	1.88	0.244125	0.0156629	0.0576488	0.343085	0.000744917	0.00555365	0.0989595	0.297496	0.494291	-0.397092	5.33539e-05	0.000524465	-0.490464	6.45859e-07	1.85787e-05	-0.180079	0.0592888	0.177172
Rg_000564	uncharacterized protein LOC115713779 [Cannabis sativa]	IPR005135_Endonuclease/exonuclease/phosphatase; IPR026960_Reverse transcriptase zinc-binding domain; IPR036691_Endonuclease/exonuclease/phosphatase superfamily; IPR000477_Reverse transcriptase domain; IPR012337_Ribonuclease H-like superfamily; IPR002156_Ribonuclease H domain	AT4G29090.1	.	Ribonuclease H-like superfamily protein	0	0	0.01	3.99	3.6	4.86	0.08	1	0.12	0.93	1.09	1.72	3.29	2.47	2.9	1.45	2.11	0.22	8.40942	3.7794e-11	3.07687e-09	5.16257	5.64863e-05	0.000624243	-3.24685	1.09061e-07	2.72622e-06	-0.844671	0.15483	0.374314	-1.57823	0.00832392	0.0545504	-0.676518	0.252709	0.489045
Rg_000565	uncharacterized protein LOC105168755 isoform X1 [Sesamum indicum] XP_011087200.1 uncharacterized protein LOC105168755 isoform X1 [Sesamum indicum]	IPR038765_Papain-like cysteine peptidase superfamily; IPR001394_Peptidase C19, ubiquitin carboxyl-terminal hydrolase; IPR006865_Domain of unknown function DUF629; IPR006866_Domain of unknown function DUF627, N-terminal	AT3G47910.1	.	Ubiquitin carboxyl-terminal hydrolase-related protein	1.01	4.69	10.32	14.35	14.26	12.98	11.34	11.34	9.93	5.5	6.76	6.72	19.29	18.11	16.49	10.5	20.08	2.24	-0.0902875	0.556771	0.731049	-0.178369	0.248533	0.461081	-0.0880814	0.558544	0.73529	-0.241769	0.11182	0.300025	-0.147464	0.331579	0.644484	0.226371	0.13062	0.31422
Rg_000566	uncharacterized protein LOC105176969 [Sesamum indicum]	IPR003593_AAA+ ATPase domain; IPR027417_P-loop containing nucleoside triphosphate hydrolase; IPR041569_AAA ATPase, AAA+ lid domain; IPR003959_ATPase, AAA-type, core	AT3G15120.2	.	P-loop containing nucleoside triphosphate hydrolases superfamily protein	0.47	1.61	2.93	5.12	5.59	5.29	4.25	4.37	2.41	1.05	1.65	1.84	4.26	3.21	3.18	2.17	4.18	0.49	0.0665662	0.745108	0.87253	-0.247633	0.232834	0.442071	-0.314199	0.114129	0.257286	-0.945463	4.63055e-06	5.77497e-05	-1.02511	7.20542e-07	2.05197e-05	-0.7473	0.000196697	0.00155957
Rg_000567	nuclear pore complex protein NUP96 [Sesamum indicum]	IPR036903_Peptidase S59, nucleoporin superfamily; IPR021967_Nuclear protein 96; IPR007230_Peptidase S59, nucleoporin	AT1G80680.1	SAR3	SUPPRESSOR OF AUXIN RESISTANCE 3	0.18	0.82	0.98	1.48	1.02	0.97	0.85	1.44	1.15	0.45	0.44	0.53	0.98	0.95	0.82	0.86	1.79	0.17	-0.894537	0.00300425	0.0158334	-0.638351	0.0351414	0.117409	0.256186	0.386389	0.586426	-0.366996	0.238655	0.495427	-0.142457	0.641684	0.873022	-0.482954	0.112312	0.282682
Rg_000568	putative DNA-binding protein, contains SAP domain [Handroanthus impetiginosus]	IPR025954_DBC1/CARP1 catalytically inactive NUDIX hydrolase domain; IPR011992_EF-hand domain pair	AT2G03150.1	emb1579	ATP/GTP-binding protein family	0.06	0.66	1.63	2.66	1.96	3.14	1.48	1.13	0.94	1.13	1.02	1.09	1.45	0.78	2.03	1.43	2.65	0.11	0.462549	0.31434	0.506125	-0.413232	0.374589	0.598692	-0.87578	0.0531989	0.149623	-0.354354	0.433274	0.699426	-0.98924	0.0306034	0.14282	-0.996332	0.0278701	0.0998148
Rg_000569	hypothetical protein [Beta vulgaris subsp. vulgaris]	IPR000477_Reverse transcriptase domain; IPR002156_Ribonuclease H domain; IPR036691_Endonuclease/exonuclease/phosphatase superfamily; IPR012337_Ribonuclease H-like superfamily; IPR026960_Reverse transcriptase zinc-binding domain	AT4G29090.1	.	Ribonuclease H-like superfamily protein	0.05	0.05	0.26	2.8	2.73	2.91	1.53	2.22	0.57	0.1	0.07	0.33	0.97	0.48	0.47	3.55	4.2	0.51	2.96409	2.76248e-08	9.47409e-07	2.16442	5.67833e-05	0.000626922	-0.799667	0.0906062	0.218756	-3.1475	1.15466e-09	2.71924e-08	0.16608	0.723919	0.918225	-2.31918	1.81064e-06	2.32246e-05
Rg_000570	hypothetical protein PHJA_001837700 [Phtheirospermum japonicum]	.	AT3G50590.2	.	Transducin/WD40 repeat-like superfamily protein	0.33	0	0.06	0.21	0.27	0	0	0.32	0	0	0	0	0.81	1.2	0.5	1.06	0	0	-3.07337	0.320201	0.512608	-3.61155	0.244154	0.456077	-0.538179	0.862476	0.942658	-5.17109	0.117693	0.311269	1.17039	0.705423	0.908808	2.25212	0.466196	0.705028
Rg_000571	DNA-directed RNA polymerase [Striga asiatica]	IPR007083_RNA polymerase Rpb1, domain 4; IPR007080_RNA polymerase Rpb1, domain 1; IPR007066_RNA polymerase Rpb1, domain 3; IPR007075_RNA polymerase Rpb1, domain 6; IPR000684_RNA polymerase II, heptapeptide repeat, eukaryotic; IPR000722_RNA polymerase, alpha subunit; IPR007081_RNA polymerase Rpb1, domain 5; IPR006592_RNA polymerase, N-terminal; IPR007073_RNA polymerase Rpb1, domain 7	AT4G35800.1	NRPB1	RNA polymerase II large subunit	2.71	10.49	22.19	36.38	34.27	34.9	26.76	32.37	22.8	11.63	14.48	12.76	25.35	22.92	22.28	20.57	33.52	3.99	0.0497067	0.583829	0.75217	-0.069838	0.444839	0.663161	-0.119545	0.176104	0.347747	-0.552933	8.28715e-10	1.98492e-08	-0.652837	5.03838e-13	4.77452e-11	-0.729048	3.15422e-16	1.73132e-14
Rg_000572	protein RRC1 isoform X2 [Sesamum indicum]	IPR013170_mRNA splicing factor Cwf21 domain; IPR000061_SWAP/Surp; IPR006569_CID domain; IPR035967_SWAP/Surp superfamily; IPR008942_ENTH/VHS	AT5G25060.1	RRC1	RNA recognition motif (RRM)-containing protein	0	0	0	0.51	0.14	0.6	0	0	0	0	0	0	0	0	0	0	0	0	6.01351	0.177473	0.344689	0	1	1	-7.01045	0.11593	0.260184	-6.56362	0.141051	0.351763	-6.70614	0.132621	0.382789	-7.0836	0.112175	0.282445
Rg_000573	hypothetical protein [Capsicum annuum fabavirus]	IPR003181_Large coat protein	AT2G06050.1	OPR3	oxophytodienoate-reductase 3	0	0	0	0	0	0	0.14	0.33	0	0	0	0	0	0	0	0.35	0	0	0	1	1	4.67996	0.36272	0.586802	6.05764	0.238766	0.426906	0	1	1	5.55956	0.280281	0.589131	0	1	1
Rg_000574	histone acetyltransferase HAC1-like isoform X1 [Sesamum indicum] XP_011085470.1 histone acetyltransferase HAC1-like isoform X1 [Sesamum indicum] XP_011085471.1 histone acetyltransferase HAC1-like isoform X1 [Sesamum indicum] XP_020552149.1 histone acetyltransferase HAC1-like isoform X1 [Sesamum indicum]	IPR013178_Histone acetyltransferase Rtt109/CBP; IPR000197_Zinc finger, TAZ-type; IPR011011_Zinc finger, FYVE/PHD-type; IPR035898_TAZ domain superfamily; IPR019787_Zinc finger, PHD-finger; IPR000433_Zinc finger, ZZ-type	AT1G79000.2	HAC1	histone acetyltransferase of the CBP family 1	0.8	3.1	6.51	10.15	11.62	8.98	5.79	6.34	6.4	4.63	5.6	4.46	10.01	9.5	8.32	6.56	13.65	1.08	0.0366473	0.847306	0.932392	-0.417955	0.0297613	0.103654	-0.454602	0.0152225	0.0588856	-0.176656	0.346638	0.617981	-0.454053	0.0162203	0.0903788	-0.293484	0.115648	0.288647
Rg_000575	hypothetical protein [Beta vulgaris subsp. vulgaris]	IPR012337_Ribonuclease H-like superfamily; IPR026960_Reverse transcriptase zinc-binding domain; IPR005135_Endonuclease/exonuclease/phosphatase; IPR002156_Ribonuclease H domain; IPR036691_Endonuclease/exonuclease/phosphatase superfamily; IPR000477_Reverse transcriptase domain	AT4G29090.1	.	Ribonuclease H-like superfamily protein	0.03	0.14	0.34	4.28	3.01	3.21	0.18	0.69	0.12	1.89	5.19	2.57	5.05	5.73	4.37	3.09	5.75	0.55	2.90667	4.23044e-11	3.39997e-09	-0.291129	0.538519	0.74494	-3.1978	1.66397e-14	2.13567e-12	0.721629	0.0572078	0.185563	-0.0123169	0.974296	1	0.392933	0.299859	0.543833
Rg_000576	type ii inositol 1 4 5-trisphosphate 5-phosphatase fra3 [Phtheirospermum japonicum]	IPR000300_Inositol polyphosphate-related phosphatase; IPR001680_WD40 repeat; IPR036691_Endonuclease/exonuclease/phosphatase superfamily; IPR005135_Endonuclease/exonuclease/phosphatase; IPR036322_WD40-repeat-containing domain superfamily	AT1G65580.1	FRA3	Endonuclease/exonuclease/phosphatase family protein	0.28	1.31	2.08	1.43	1.2	1.2	2	1.92	1.36	1.17	1.8	1.09	2.43	2.73	1.98	2.89	3.28	0.39	-1.53804	3.10037e-12	3.37071e-10	-0.831897	0.00013026	0.00127448	0.706142	0.0011974	0.00782588	0.957581	1.30489e-05	0.00014747	0.97276	8.98724e-06	0.000187001	0.749335	0.000545254	0.00378047
Rg_000577	clathrin heavy chain [Salvia splendens]	IPR016341_Clathrin, heavy chain; IPR016024_Armadillo-type fold; IPR015348_Clathrin, heavy chain, linker, core motif; IPR000547_Clathrin, heavy chain/VPS, 7-fold repeat; IPR016025_Clathrin heavy chain, N-terminal; IPR022365_Clathrin, heavy chain, propeller repeat	AT3G11130.1	.	Clathrin, heavy chain	2.22	11.03	25.6	47.25	44.41	42.57	49.99	55.31	28.14	12.86	18.71	18.77	53.23	49.58	44.61	42.3	84.65	5.28	0.375979	0.0813761	0.197066	0.585834	0.00663837	0.0325608	0.209855	0.32746	0.526974	-0.534032	0.0129897	0.0588153	-0.0289091	0.892875	0.989762	-0.0118487	0.955916	1
Rg_000578	putative leucine-rich repeat-containing protein DDB_G0290503 [Sesamum indicum]	IPR011684_Protein Networked (NET), actin-binding (NAB) domain	AT5G41790.2	CIP1	COP1-interactive protein 1	2.37	6.15	13.26	18.44	23.34	23.43	58.43	53.6	38.39	9.87	12.42	12.72	8	9.02	9.18	12.27	22.62	3.76	-0.0628104	0.796687	0.904367	1.37574	1.57471e-08	4.52972e-07	1.43855	2.60033e-09	9.96263e-08	-0.0206228	0.932287	1	-0.384834	0.113686	0.347539	-1.46533	1.95151e-09	4.25277e-08
Rg_000579	histone-lysine n-methyltransferase smyd3 [Phtheirospermum japonicum]	IPR001214_SET domain	AT1G33400.3	TPR9	Tetratricopeptide repeat (TPR)-like superfamily protein	0	0	0	0.95	0.45	0.4	0.44	0	0	0.35	0.15	0.53	0	0.43	0.82	0.17	0.78	0	6.51317	0.00178613	0.0104588	4.71471	0.024701	0.090207	-1.79846	0.301892	0.499355	0.173691	0.919925	1	-1.32382	0.447282	0.744112	-0.579058	0.737708	0.894713
Rg_000580	putative GTP diphosphokinase RSH1, chloroplastic [Sesamum indicum]	.	AT4G02260.2	RSH1	RELA/SPOT homolog 1	0	0	0	0	0.15	0.11	0.96	0.94	0.22	0.29	0.65	0.33	0.37	0.54	0.74	0.42	0	0	3.76963	0.0298629	0.0938733	6.94242	4.87707e-05	0.000552417	3.17279	0.0132533	0.0529579	3.10595	0.0155079	0.0675703	0.731201	0.579478	0.834761	2.52638	0.0490655	0.153589
Rg_000581	Prohibitin-like protein [Handroanthus impetiginosus]	IPR036013_Band 7/SPFH domain superfamily; IPR000163_Prohibitin; IPR001107_Band 7 domain	AT4G28510.1	PHB1	prohibitin 1	0.27	0.4	2.1	0	0	0	2.68	2.99	0	0	0	0	0	0	0	0	0	0	-10.0251	0.0296515	0.0933872	-0.341295	0.938969	1	9.68383	0.0356515	0.11146	0	1	1	0	1	1	0	1	1
Rg_000582	ferredoxin-dependent glutamate synthase, chloroplastic [Sesamum indicum]	IPR002932_Glutamate synthase domain; IPR036485_Glutamate synthase, alpha subunit, C-terminal domain superfamily; IPR006982_Glutamate synthase, central-N; IPR002489_Glutamate synthase, alpha subunit, C-terminal; IPR017932_Glutamine amidotransferase type 2 domain; IPR029055_Nucleophile aminohydrolases, N-terminal	AT5G04140.1	GLU1	glutamate synthase 1	1.07	3.59	9.64	22.05	13.72	17.84	26.37	24.4	16.21	135.76	39.49	89.81	29.66	33.27	37.52	34.83	46.14	5.26	0.425283	0.268258	0.456421	0.99393	0.00965983	0.0436815	0.568646	0.136417	0.291606	3.29094	6.12125e-18	3.89136e-16	0.880856	0.0210856	0.10953	0.779664	0.0410918	0.134258
Rg_000583	probable phosphoinositide phosphatase SAC9 isoform X1 [Sesamum indicum]	IPR001202_WW domain; IPR036020_WW domain superfamily; IPR002013_SAC domain	AT3G59770.1	SAC9	sacI homology domain-containing protein / WW domain-containing protein	0.63	2.71	5.88	12.07	11.53	10.04	10.13	10.63	7.68	3.71	5.67	4.01	9.62	12.01	9.43	9.14	17.19	1.41	0.368584	0.0210217	0.0720735	0.375536	0.0193736	0.0749926	0.00695189	0.963826	1	-0.452677	0.00376238	0.0212729	-0.185579	0.23191	0.531162	-0.253977	0.098416	0.257161
Rg_000584	protein TIME FOR COFFEE [Sesamum indicum]	.	AT3G22380.1	TIC	time for coffee	0.95	2.65	7.11	7.72	6.87	6.7	8.06	7.78	9.14	2.14	2.65	2.93	7.57	6.24	4.87	5.28	9	0.67	-0.541759	0.014037	0.0530997	-0.0162899	0.941072	1	0.525469	0.0154645	0.059605	-0.569119	0.0104043	0.0490856	-0.447269	0.04361	0.183287	-0.343828	0.11637	0.289974
Rg_000585	THO complex subunit 2 [Sesamum indicum]	IPR021726_THO complex, subunitTHOC2, N-terminal; IPR032302_THO complex subunit 2, N-terminal domain; IPR021418_THO complex, subunitTHOC2, C-terminal	AT1G24706.7	THO2	THO2	1.05	4.71	10.81	14.76	14.93	12.93	15.34	15.99	11.6	5.72	7.79	6.67	12.4	10.59	11.25	9.02	16.92	2.25	-0.097993	0.536678	0.715071	0.160931	0.311056	0.532269	0.258924	0.0948821	0.225972	-0.194827	0.214468	0.462539	-0.329195	0.0365897	0.162069	-0.460316	0.0032234	0.0172086
Rg_000586	pleiotropic drug resistance protein 1 isoform X2 [Sesamum indicum]	IPR003439_ABC transporter-like; IPR013525_ABC-2 type transporter; IPR003593_AAA+ ATPase domain; IPR013581_Plant PDR ABC transporter associated; IPR029481_ABC-transporter N-terminal domain; IPR027417_P-loop containing nucleoside triphosphate hydrolase	AT1G15520.1	ABCG40	pleiotropic drug resistance 12	0.32	0.84	2.95	6.59	11.16	10.8	5.38	7.02	5.06	2.38	1.5	2.55	11.8	9.48	7.79	4.74	9.05	1	1.3832	1.27299e-05	0.000176331	0.903707	0.004517	0.0239748	-0.479492	0.119018	0.265315	-1.23991	6.77031e-05	0.000649563	-0.774847	0.0123296	0.0736537	-0.151334	0.621819	0.822246
Rg_000587	hypothetical protein [Beta vulgaris subsp. vulgaris]	IPR026960_Reverse transcriptase zinc-binding domain; IPR005135_Endonuclease/exonuclease/phosphatase; IPR036691_Endonuclease/exonuclease/phosphatase superfamily; IPR000477_Reverse transcriptase domain; IPR002156_Ribonuclease H domain; IPR012337_Ribonuclease H-like superfamily	AT4G29090.1	.	Ribonuclease H-like superfamily protein	0	0	0	0.89	0.57	0.51	0	0.21	0	0.13	0	1.15	0.15	0.39	0.19	0.15	0.12	0	6.644	0.000682225	0.00482273	3.51481	0.0781698	0.209683	-3.12918	0.0527061	0.148687	0.335258	0.830709	0.959099	-2.99329	0.065802	0.242769	-1.5334	0.331272	0.578113
Rg_000588	tbc1 domain family member 17 [Phtheirospermum japonicum]	IPR021935_Small G protein signalling modulator 1/2, Rab-binding domain	AT5G52580.1	.	RabGAP/TBC domain-containing protein	0.09	0.23	0.66	1.42	1.1	1.33	2.58	2.16	1.38	0.44	0.76	0.67	1.12	0.82	0.89	1.26	1.87	0.23	0.441655	0.0922685	0.215332	1.35034	1.7006e-07	3.81304e-06	0.908683	4.18974e-05	0.000478143	-0.159192	0.510587	0.76332	0.00623591	0.978991	1	-0.582905	0.0151691	0.0617997
Rg_000589	uncharacterized protein LOC105166153 isoform X1 [Sesamum indicum]	IPR003169_GYF domain; IPR035445_GYF-like domain superfamily	AT5G42950.1	.	GYF domain-containing protein	1.55	5.87	13.71	19.84	20.44	20.29	13.29	16.82	10.57	5.97	6.95	9.34	13.06	11.92	11.97	10.43	17.72	2.12	0.0310691	0.850145	0.934057	-0.309085	0.0617191	0.176999	-0.340154	0.0362151	0.112767	-0.553333	0.000723427	0.00523153	-0.787387	1.68835e-06	4.30058e-05	-0.862031	1.27686e-07	2.05339e-06
Rg_000590	brefeldin A-inhibited guanine nucleotide-exchange protein 5 isoform X1 [Sesamum indicum] XP_020551181.1 brefeldin A-inhibited guanine nucleotide-exchange protein 5 isoform X1 [Sesamum indicum]	IPR015403_Sec7, C-terminal; IPR032629_Mon2, dimerisation and cyclophilin-binding domain; IPR035999_Sec7 domain superfamily; IPR032691_Guanine nucleotide exchange factor, N-terminal; IPR000904_Sec7 domain; IPR016024_Armadillo-type fold	AT3G43300.3	ATMIN7	HOPM interactor 7	0.21	0.58	1.31	1.24	1.09	1.94	1.99	2.99	2.15	0.46	0	0	0.38	0.68	0.29	0.64	0.99	0.13	-0.587764	0.516772	0.698866	0.390003	0.666665	0.838251	0.977767	0.27805	0.471814	-2.13561	0.0212124	0.0866968	-1.05645	0.247157	0.550147	-1.81824	0.0468451	0.148217
Rg_000591	RNA-directed DNA polymerase (reversetranscriptase)-related family protein [Striga asiatica]	IPR026960_Reverse transcriptase zinc-binding domain; IPR000477_Reverse transcriptase domain; IPR036691_Endonuclease/exonuclease/phosphatase superfamily	AT4G29090.1	.	Ribonuclease H-like superfamily protein	0.15	0.53	1.42	0.61	0.72	0.47	2.06	1.62	0	0.5	0.67	1.04	1.73	1.34	1.63	0.67	1.19	0.65	-1.66818	0.0640743	0.165226	-0.511404	0.568795	0.769294	1.15677	0.197433	0.375918	1.18464	0.187601	0.424738	1.59687	0.0752439	0.265463	1.23589	0.16818	0.373951
Rg_000592	bromodomain and WD repeat-containing protein 3-like [Sesamum indicum]	IPR036322_WD40-repeat-containing domain superfamily; IPR001680_WD40 repeat; IPR036427_Bromodomain-like superfamily; IPR001487_Bromodomain	AT5G49430.1	.	WD40/YVTN repeat and Bromo-WDR9-I-like domain-containing protein	0.32	2.22	4.07	6.02	6.68	6.44	4.61	4.81	4.05	3.12	2.59	2.86	7.58	7.11	5.72	5.29	8.03	0.74	0.0943347	0.688916	0.83167	-0.158584	0.504328	0.715418	-0.252918	0.272776	0.465873	-0.25017	0.281374	0.547461	-0.334245	0.151096	0.413585	-0.064311	0.77946	0.916855
Rg_000593	polyprotein [Broad bean wilt virus 2]	IPR001205_RNA-directed RNA polymerase, C-terminal domain; IPR000199_Peptidase C3A/C3B, picornaviral; IPR000605_Helicase, superfamily 3, single-stranded DNA/RNA virus; IPR009003_Peptidase S1, PA clan; IPR027417_P-loop containing nucleoside triphosphate hydrolase	AT4G02790.1	EMB3129	GTP-binding family protein	3.86	0.83	25.48	2.98	1.59	27.52	35.05	46.58	5.34	3.32	2.1	31.32	4.5	4.42	22.46	4.25	5.24	4.37	-1.36933	0.247999	0.432931	0.132675	0.910865	0.99455	1.50201	0.204998	0.385609	1.0383	0.381004	0.651716	0.0500546	0.966323	1	-0.19642	0.868394	0.961888
Rg_000594	Sister chromatid cohesion protein SCC2/Nipped-B [Handroanthus impetiginosus]	IPR011011_Zinc finger, FYVE/PHD-type; IPR026003_HEAT repeat associated with sister chromatid cohesion protein; IPR024986_Sister chromatid cohesion C-terminal domain; IPR016024_Armadillo-type fold	AT5G15540.1	EMB2773	PHD finger family protein	0.91	4.11	8.79	10.14	10.48	10.71	9.52	10.76	8.41	4.42	7.38	5.94	10.31	9.75	10.45	5.96	12.28	1.63	-0.290263	0.130365	0.276867	-0.165854	0.388764	0.612178	0.124409	0.510172	0.696503	0.0447018	0.814052	0.950732	-0.391257	0.0411872	0.175879	-0.185033	0.328431	0.57495
Rg_000595	putative GTP diphosphokinase RSH1, chloroplastic [Sesamum indicum]	IPR003607_HD/PDEase domain; IPR004095_TGS; IPR007685_RelA/SpoT; IPR012676_TGS-like	AT4G02260.2	RSH1	RELA/SPOT homolog 1	0.14	0.24	0.58	7.47	8.98	7.69	0.89	3.64	3.37	12.51	9.51	10.76	13.45	15.93	15.87	6.9	8.01	0.94	2.93085	7.70029e-11	5.7909e-09	1.60514	0.00040132	0.00330936	-1.32571	0.00183622	0.0111041	1.35958	0.00126797	0.00849214	-0.426546	0.314804	0.626981	0.764765	0.069868	0.200566
Rg_000596	hypothetical protein PHJA_000390700 [Phtheirospermum japonicum]	IPR008974_TRAF-like	.	.	.	0.22	0.73	1.41	1.57	1.45	1.92	1.52	2.04	0.55	1	1.01	0.76	1.33	1.71	1.21	2.11	2.22	0.27	-0.528541	0.099606	0.227676	-0.611254	0.0596945	0.172953	-0.0827131	0.793201	0.902894	0.0640538	0.840383	0.963791	0.0833249	0.79323	0.950283	-0.367776	0.24628	0.481101
Rg_000597	Retrovirus-related Pol polyprotein from transposon TNT 1-94 [Vitis vinifera]	IPR001584_Integrase, catalytic core; IPR025724_GAG-pre-integrase domain; IPR012337_Ribonuclease H-like superfamily	AT4G23160.3	CRK8	cysteine-rich RECEPTOR-like kinase	0.05	0.2	0.3	0.8	0.57	0.64	0.37	0.68	0.13	0.95	1.14	1.14	0.53	0.4	0.38	2.4	2.85	0.33	0.205584	0.566458	0.738277	-0.314832	0.401949	0.624479	-0.520417	0.122914	0.271375	1.58934	2.69254e-07	4.31979e-06	1.67501	5.51651e-08	2.05927e-06	-0.740086	0.030145	0.105875
Rg_000598	anaphase-promoting complex subunit 1 [Sesamum indicum]	IPR024990_Anaphase-promoting complex subunit 1; IPR041221_Anaphase-promoting complex subunit 1, C-terminal	AT5G05560.2	EMB2771	E3 ubiquitin ligase	0.58	2.66	5.67	4.37	5.05	5.47	8.86	7.9	5.22	1.26	1.09	1.2	2.69	2.18	2.3	1.92	4.03	0.56	-0.722746	0.00263684	0.014291	0.0665764	0.781002	0.913768	0.789322	0.000828069	0.00578591	-1.16733	2.64948e-06	3.48961e-05	-0.919213	0.000188252	0.00257156	-1.21327	6.85828e-07	9.54033e-06
Rg_000599	protein MEI2-like 2 [Sesamum indicum] XP_011082914.1 protein MEI2-like 2 [Sesamum indicum]	IPR000504_RNA recognition motif domain; IPR035979_RNA-binding domain superfamily	AT2G42910.1	.	Phosphoribosyltransferase family protein	0.65	2.78	5.03	8.78	8.14	7.82	8.11	8.2	7.5	4.33	4.16	3.88	9.52	9.42	9.49	6.28	10.77	1	-0.0141443	0.931962	0.980096	0.199267	0.230573	0.439241	0.213412	0.18121	0.354906	-0.0901566	0.578359	0.813633	-0.326069	0.0460169	0.190305	0.0596651	0.708775	0.877483
Rg_000600	SAC3 family protein B isoform X1 [Sesamum indicum]	IPR005062_SAC3/GANP/THP3	AT3G06290.1	SAC3B	SAC3/GANP/Nin1/mts3/eIF-3 p25 family	0	0.37	0.14	0.24	0.39	0.36	1.51	0.79	0.46	0.06	0.09	0.15	0.69	0.1	0.74	0.62	0.53	0	-0.582739	0.565321	0.737505	1.08381	0.281121	0.499326	1.66655	0.0925908	0.222128	-0.928483	0.368131	0.639692	-0.0243192	0.980809	1	0.450181	0.651837	0.841891
Rg_000601	uncharacterized protein LOC112016795 [Quercus suber]	IPR036691_Endonuclease/exonuclease/phosphatase superfamily; IPR000477_Reverse transcriptase domain	AT4G29090.1	.	Ribonuclease H-like superfamily protein	0	0	0	3.5	3.92	2.73	0	1.42	0	0.11	0.04	0	0.64	0.41	0.07	1.95	2.59	0.01	9.02185	7.2588e-06	0.00010913	6.21327	0.00206688	0.0128181	-2.80858	0.0864443	0.211736	-5.02062	0.00278268	0.0164625	-1.44259	0.377455	0.68637	-3.35842	0.0406993	0.133298
Rg_000602	Retrovirus-related Pol polyprotein from transposon TNT 1-94 [Cajanus cajan]	IPR025724_GAG-pre-integrase domain	AT4G23160.3	CRK8	cysteine-rich RECEPTOR-like kinase	0.27	0.44	2.6	0.91	0.77	0.55	2.64	2.92	2.64	0.17	0.95	0.64	1.44	0.82	1.04	0.96	1.13	0.09	-1.9764	1.27728e-05	0.000176642	0.18066	0.683356	0.84958	2.15706	1.32442e-06	2.43559e-05	0.482697	0.293715	0.561152	0.0511683	0.912532	0.995353	0.422189	0.353394	0.601612
Rg_000603	hypothetical protein [Capsicum annuum fabavirus]	IPR003181_Large coat protein	AT2G38080.1	IRX12	Laccase/Diphenol oxidase family protein	0.03	0.07	0.47	12.12	1.99	1.5	0.29	0.38	0.84	3.45	0.61	0.54	11.86	0.84	0.67	78.6	36.01	0.68	3.40186	0.00253387	0.0138296	0.483853	0.669758	0.840463	-2.91801	0.00841444	0.0371677	-0.660536	0.548541	0.792226	2.85226	0.00943546	0.0600721	-0.3734	0.734256	0.892533
Rg_000604	uncharacterized protein LOC105180271 [Sesamum indicum]	IPR036691_Endonuclease/exonuclease/phosphatase superfamily; IPR026960_Reverse transcriptase zinc-binding domain; IPR000477_Reverse transcriptase domain	AT3G24255.5	.	RNA-directed DNA polymerase (reverse transcriptase)-related family protein	0	0	0	10.76	7.7	10.22	0	3.49	3.83	2.02	2.75	2.93	5.09	4.28	5.1	4.32	9.3	1.31	10.5193	4.88694e-12	5.01308e-10	8.8807	5.58755e-09	1.78174e-07	-1.63857	0.0901391	0.218003	-1.01079	0.295679	0.563682	-0.619931	0.521136	0.796724	-1.12878	0.242672	0.476679
Rg_000605	callose synthase 12 [Phtheirospermum japonicum]	IPR026899_1,3-beta-glucan synthase subunit FKS1-like, domain-1; IPR003440_Glycosyl transferase, family 48	AT4G03550.1	GSL05	glucan synthase-like 5	0.86	3.07	8.48	15.43	14.52	14.97	19.46	21.52	14.15	3.98	6.53	5.96	10.54	10.42	9.93	8.74	16.97	1.61	0.403813	0.00628588	0.0283225	0.938176	2.08652e-10	9.04817e-09	0.534363	0.000156841	0.00145159	-0.576866	7.05187e-05	0.00067371	-0.581095	6.30778e-05	0.00101657	-0.684974	1.88234e-06	2.40411e-05
Rg_000606	RNA-directed DNA polymerase-like protein [Striga asiatica]	IPR036691_Endonuclease/exonuclease/phosphatase superfamily; IPR026960_Reverse transcriptase zinc-binding domain; IPR000477_Reverse transcriptase domain	AT1G43760.1	.	DNAse I-like superfamily protein	0.47	1.82	4.06	4.69	4.57	4.48	7.82	8.59	0.71	3.45	4.84	4.12	5.47	5.62	5.3	6.21	7.03	1.11	-0.387554	0.428263	0.620399	0.0619629	0.89921	0.988071	0.449517	0.355202	0.55555	0.732686	0.131954	0.33677	0.365178	0.45353	0.74825	0.111174	0.819263	0.938076
Rg_000607	squamosa promoter-binding-like protein 14 [Sesamum indicum]	IPR004333_SBP domain; IPR036770_Ankyrin repeat-containing domain superfamily; IPR036893_SBP domain superfamily	AT1G76580.1	.	Squamosa promoter-binding protein-like (SBP domain) transcription factor family protein	0.6	1.22	3.16	7.32	8.11	6.23	8.69	17.12	15.37	0.76	4.51	2.05	5.8	4.45	5.53	2.45	6.69	0.93	0.445213	0.331168	0.524413	1.65372	0.000301201	0.00261133	1.20851	0.0076108	0.0343663	-0.769391	0.0917893	0.261439	-0.78303	0.0863702	0.29059	-0.600055	0.186943	0.401511
Rg_000608	isoamylase 3, chloroplastic isoform X3 [Sesamum indicum]	IPR017853_Glycoside hydrolase superfamily	AT4G09020.1	ISA3	isoamylase 3	0.08	0.59	1.13	1.08	0.7	1.09	0.93	1.04	0.46	1.81	1.94	2.29	4.31	2.56	2.66	2.49	3.9	0.57	-0.801406	0.0112804	0.0447463	-0.816341	0.0111296	0.0487811	-0.0149348	0.961827	0.998911	1.98846	2.31382e-11	6.86606e-10	1.58357	1.31009e-07	4.47035e-06	1.57955	1.04189e-07	1.70807e-06
Rg_000609	LOW QUALITY PROTEIN: uncharacterized protein LOC107177719 [Citrus sinensis]	IPR000477_Reverse transcriptase domain; IPR005162_Retrotransposon gag domain; IPR021109_Aspartic peptidase domain superfamily	AT2G23180.1	CYP96A1	cytochrome P450, family 96, subfamily A, polypeptide 1	0	0	0	0.43	0.03	0.1	0	0.04	0	0.27	0.58	0.22	0	0.09	0.18	1.11	1.1	0.02	4.76629	0.00449447	0.0217842	1.19975	0.526065	0.734482	-3.56653	0.0173367	0.0649578	1.86019	0.122751	0.320198	1.87903	0.119145	0.358007	-1.00809	0.419616	0.665133
Rg_000610	orf1 [Broad bean wilt virus 2]	IPR003182_RNA2 polyprotein; IPR003181_Large coat protein	AT2G29110.1	GLR2.8	glutamate receptor 2.8	43.12	0.88	374.82	530.56	951.48	524.44	322.3	321.02	2548.21	274.54	1636.62	211.46	1327.36	1310.82	274.61	2278.88	877.76	46.6	0.899615	0.437325	0.628586	2.04586	0.0773319	0.208106	1.14625	0.322328	0.521286	0.838003	0.469348	0.729297	0.639012	0.581134	0.835767	0.355377	0.758968	0.905966
Rg_000611	myosin-12 [Phtheirospermum japonicum]	IPR002710_Dilute domain; IPR004009_Myosin, N-terminal, SH3-like; IPR001609_Myosin head, motor domain; IPR000048_IQ motif, EF-hand binding site; IPR027417_P-loop containing nucleoside triphosphate hydrolase	AT2G31900.4	XIF	myosin-like protein XIF	0.1	0.14	0.9	4.38	3.28	3.94	0.97	0.95	0.64	0.74	1.19	1.32	5.74	3.96	3.02	6.37	10.31	0.54	1.96556	1.92779e-07	5.01996e-06	0.031646	0.935433	1	-1.93392	6.80695e-08	1.79817e-06	-0.950909	0.00700425	0.0354967	0.5261	0.127403	0.373515	-0.0294243	0.932039	0.990849
Rg_000612	hypothetical protein MIMGU_mgv1a000141mg [Erythranthe guttata]	.	AT3G50590.2	.	Transducin/WD40 repeat-like superfamily protein	0	0.21	0	0.37	0	0.11	0	0	0.31	0	0	0.41	0	0	0	0	0	0	-0.667432	0.894153	0.959629	-0.671497	0.89356	0.984389	-0.00406428	0.999353	1	0.796808	0.873642	0.981465	-5.21974	0.309923	0.621901	-5.5972	0.276237	0.517858
Rg_000613	PREDICTED: myosin-17-like [Erythranthe guttata]	IPR001609_Myosin head, motor domain; IPR000048_IQ motif, EF-hand binding site; IPR027417_P-loop containing nucleoside triphosphate hydrolase; IPR004009_Myosin, N-terminal, SH3-like	AT5G20490.2	XIK	myosin family protein with Dil	0.12	0.31	0.22	0.27	0.11	0.67	0	0.23	0.15	0.1	0	0	0.58	0.52	0.27	0.92	0.33	0	-1.36817	0.299268	0.490819	-2.58359	0.053676	0.159925	-1.21542	0.363238	0.563598	-2.31629	0.0960698	0.269863	0.0873476	0.947372	1	0.163591	0.901138	0.976219
Rg_000614	hypothetical protein [Proteus mirabilis] MBB6642046.1 hypothetical protein [Proteus mirabilis]	IPR003181_Large coat protein	AT1G31360.3	RECQL2	RECQ helicase L2	0.45	0.94	0.3	5.04	4.78	6	1.32	5.85	1.53	1.68	0.92	1.71	2.76	1.59	3.1	2.61	3.57	0.47	0.873968	0.171516	0.336687	0.165296	0.796461	0.923048	-0.708673	0.263774	0.455599	-0.944295	0.137518	0.346037	-1.00401	0.114612	0.349276	-1.23509	0.0518352	0.160108
Rg_000615	uncharacterized protein LOC115713779 [Cannabis sativa]	IPR002156_Ribonuclease H domain; IPR036691_Endonuclease/exonuclease/phosphatase superfamily; IPR000477_Reverse transcriptase domain; IPR012337_Ribonuclease H-like superfamily; IPR026960_Reverse transcriptase zinc-binding domain; IPR005135_Endonuclease/exonuclease/phosphatase	AT4G29090.1	.	Ribonuclease H-like superfamily protein	0	0.07	0.13	0.35	0.14	0.21	0.11	0.2	0.37	0.13	0.44	0.12	0.18	0.18	0.15	0.2	0.27	0	0.441308	0.581295	0.750296	0.755969	0.345944	0.569448	0.314661	0.66699	0.819463	0.810387	0.266639	0.529774	-0.668316	0.388758	0.695784	-0.601118	0.425167	0.66998
Rg_000616	copia LTR rider [Trifolium pratense]	IPR001584_Integrase, catalytic core; IPR001878_Zinc finger, CCHC-type; IPR025724_GAG-pre-integrase domain; IPR036875_Zinc finger, CCHC-type superfamily; IPR012337_Ribonuclease H-like superfamily; IPR013103_Reverse transcriptase, RNA-dependent DNA polymerase	AT4G23160.3	CRK8	cysteine-rich RECEPTOR-like kinase	0.79	1.96	5.59	1.1	0.96	1.36	8.54	7.47	3.22	1.31	1.39	0.94	3.62	2.53	2.12	1.78	2.02	0.08	-2.83208	8.06671e-15	1.63795e-12	-0.143273	0.686986	0.852178	2.6888	1.10614e-13	1.21991e-11	0.98066	0.0080055	0.0396214	0.132802	0.725224	0.918862	1.10416	0.00256861	0.0142504
Rg_000617	mediator of RNA polymerase ii transcription subunit 14 [Phtheirospermum japonicum]	IPR013947_Mediator complex, subunit Med14	AT3G04740.1	SWP	RNA polymerase II transcription mediator	0.82	3.4	7.35	9.72	10.97	9.99	4.89	5.92	5.47	6.72	6.83	6.54	10.43	10.36	9.46	8.08	11.81	1.35	-0.0876779	0.599985	0.764355	-0.739716	1.38709e-05	0.000186195	-0.652038	7.96076e-05	0.000827905	0.285726	0.0804221	0.238015	-0.344015	0.0379656	0.166122	-0.171296	0.294144	0.537532
Rg_000618	PREDICTED: metacaspase-3-like [Erythranthe guttata]	IPR029030_Caspase-like domain superfamily	AT1G02170.1	MC1	metacaspase 1	0.24	0.42	0.77	0.68	0.34	0.42	0.73	1.37	1.29	0.47	0	0	2.27	4.16	5.37	0	4.68	0.87	-1.9139	0.164302	0.326782	-0.369744	0.787588	0.917389	1.54416	0.260855	0.452394	-0.519158	0.70847	0.895202	2.58304	0.0597944	0.227575	2.93671	0.0322111	0.111242
Rg_000619	PREDICTED: uncharacterized protein LOC105951089 [Erythranthe guttata] EYU46303.1 hypothetical protein MIMGU_mgv1a021307mg [Erythranthe guttata]	IPR011004_Trimeric LpxA-like superfamily; IPR009081_Phosphopantetheine binding ACP domain; IPR036736_ACP-like superfamily; IPR000873_AMP-dependent synthetase/ligase	AT1G66120.1	AAE11	AMP-dependent synthetase and ligase family protein	0.27	0.96	2.1	2.04	1.79	2.1	2.06	2.4	0.56	0.65	0.54	0.8	0.99	0.73	1.2	2.46	3.41	0.48	-0.710918	0.0421842	0.12133	-0.773395	0.0282983	0.0997105	-0.0624774	0.857048	0.939609	-0.666949	0.0613631	0.195539	0.362118	0.296652	0.607217	-1.16391	0.0010873	0.00685922
Rg_000620	RNA-directed DNA polymerase (reversetranscriptase)-related family protein [Striga asiatica]	IPR036691_Endonuclease/exonuclease/phosphatase superfamily	ATMG00310.1	ORF154	RNA-directed DNA polymerase (reverse transcriptase)-related family protein	0.02	0	0	0.3	0	0.11	0	0.15	0	0.53	0	0.29	0.44	0.68	0.12	0	0.21	0	0.809841	0.72177	0.855269	-0.523769	0.820756	0.939008	-1.33361	0.552253	0.730041	2.08397	0.342521	0.613654	-1.47034	0.51712	0.793906	1.5034	0.493562	0.727469
Rg_000621	uncharacterized protein LOC105173090 [Sesamum indicum]	0	AT3G61690.3	.	nucleotidyltransferase	0	0	0	0	0.13	0	0	0	0.7	0	0	0	0	0	0	0	0	0	2.71936	0.597883	0.762623	5.71256	0.266205	0.481654	2.9932	0.551268	0.729219	-3.26953	0.525998	0.775082	-3.41205	0.50812	0.787073	-3.78951	0.462353	0.701885
Rg_000622	eukaryotic translation initiation factor 4G [Sesamum indicum] XP_020553218.1 eukaryotic translation initiation factor 4G [Sesamum indicum]	IPR003890_MIF4G-like, type 3; IPR016024_Armadillo-type fold; IPR003891_Initiation factor eIF-4 gamma, MA3	AT3G60240.2	EIF4G	eukaryotic translation initiation factor 4G	1.91	7.84	19.75	29.55	28.97	27.68	23.62	28.1	17.59	11.09	13.74	15.08	40.66	41.43	36.09	22.69	52.65	4.61	0.110725	0.517574	0.699548	0.0315952	0.853852	0.959916	-0.0791297	0.640069	0.799142	-0.221576	0.192053	0.431289	0.000605876	0.997151	1	0.308997	0.0671902	0.194851
Rg_000623	histone-lysine n-methyltransferase smyd3 [Phtheirospermum japonicum]	IPR001214_SET domain	AT1G33400.3	TPR9	Tetratricopeptide repeat (TPR)-like superfamily protein	0	0.39	2.76	0.34	1.58	0.99	2.26	1.45	0.99	0.39	1.22	1.45	1.71	1.68	0.27	2.18	3.03	0.62	-0.927514	0.305676	0.497345	-0.0381008	0.966383	1	0.889413	0.323316	0.522274	0.873742	0.332593	0.603268	1.41467	0.116149	0.352148	0.105128	0.907297	0.979158
Rg_000624	hypothetical protein PHJA_000390700 [Phtheirospermum japonicum]	0	.	.	.	0	0.57	1.14	0.24	0.65	0.42	0.69	0.3	0.5	0.4	0.48	0.73	1.34	0.29	0.79	1.5	0.47	0.31	-1.51036	0.0742128	0.183952	-1.0542	0.212601	0.416154	0.456162	0.589095	0.75963	1.16329	0.167169	0.393425	1.4581	0.0828626	0.2825	0.680443	0.418987	0.664518
Rg_000625	protein chromatin remodeling 4 [Phtheirospermum japonicum]	IPR018501_DDT domain; IPR019787_Zinc finger, PHD-finger; IPR001965_Zinc finger, PHD-type; IPR028942_WHIM1 domain; IPR011011_Zinc finger, FYVE/PHD-type	AT5G22760.1	.	PHD finger family protein	0.53	2.26	3.67	5.78	6.13	6.33	3.23	3.88	2.97	3.74	6.08	4.33	10.68	8.63	9.27	6.03	10.68	1.14	-0.0969222	0.565187	0.737371	-0.707074	4.46123e-05	0.000512037	-0.610152	0.000228811	0.00199125	0.497298	0.00212935	0.0131318	0.137358	0.401237	0.707506	0.494179	0.00202363	0.0116224
Rg_000626	malectin/receptor-like protein kinase family protein [Striga asiatica]	IPR000719_Protein kinase domain; IPR024788_Malectin-like domain; IPR011009_Protein kinase-like domain superfamily	AT5G39000.1	.	Malectin/receptor-like protein kinase family protein	0.08	0.31	0.9	2.4	3.66	2.3	5.23	5.5	4.22	1.31	3.54	2.18	1.45	1.72	1.5	1.28	3.69	0.33	1.26802	0.000195444	0.00172897	2.35486	3.52721e-12	2.15586e-10	1.08685	0.000435052	0.00340155	0.584449	0.0610016	0.194662	-0.532358	0.0957209	0.31037	-0.986291	0.00198056	0.0114189
Rg_000627	PREDICTED: uncharacterized protein LOC105971639 [Erythranthe guttata]	IPR036890_Histidine kinase/HSP90-like ATPase superfamily	AT5G24280.2	GMI1	gamma-irradiation and mitomycin c induced 1	0.47	3.8	7.08	4.12	2.5	4.87	14.72	11.47	19.09	1	0.93	0.89	0	1.51	0.42	0.45	4.22	0.74	-1.35492	0.123461	0.266032	0.94694	0.281108	0.499326	2.30186	0.00876417	0.0383959	-1.12505	0.202752	0.445965	-0.563199	0.522993	0.797889	-2.69998	0.002393	0.0134141
Rg_000628	callose synthase 11 [Sesamum indicum]	IPR003440_Glycosyl transferase, family 48; IPR026899_1,3-beta-glucan synthase subunit FKS1-like, domain-1	AT4G04970.1	GSL1	glucan synthase-like 1	0.78	2.14	8.36	19.05	14.18	16.83	4.01	6.19	7.48	2.2	1.76	2.29	10.24	7.86	7.87	10.56	17.55	1.64	0.768255	0.0124534	0.0483247	-0.423089	0.171419	0.360472	-1.19134	9.53531e-05	0.000962739	-2.08101	1.75214e-11	5.29139e-10	-0.624062	0.0408303	0.174964	-1.09432	0.000331977	0.00245399
Rg_000629	uncharacterized protein LOC105159727 [Sesamum indicum]	IPR033403_Domain of unknown function DUF5110	AT3G23640.2	HGL1	heteroglycan glucosidase 1	0.05	0.36	0.81	1	0.72	0.58	0.83	1.08	0.8	0.38	0.18	0.32	0.61	0.47	0.54	0.64	0.72	0	-0.503381	0.316071	0.507976	0.01077	0.982861	1	0.514151	0.291702	0.487645	-0.409822	0.41763	0.685631	-0.891412	0.0840651	0.285412	-0.632481	0.206086	0.428264
Rg_000630	protein rst1 [Phtheirospermum japonicum]	IPR016024_Armadillo-type fold; IPR022542_Domain of unknown function DUF3730	AT3G27670.1	RST1	ARM repeat superfamily protein	0.65	3.25	6.04	7.39	6.57	6.76	10.06	10.21	3.93	2.14	2.63	2.47	4.88	5.24	3.83	5.16	9.6	1.14	-0.446312	0.0659622	0.168579	-0.0206353	0.932255	1	0.425677	0.0750629	0.191181	-0.623368	0.0106509	0.0500932	-0.159992	0.508786	0.787634	-0.719682	0.00295662	0.0160214
Rg_000631	uncharacterized protein LOC105180271 [Sesamum indicum]	IPR036691_Endonuclease/exonuclease/phosphatase superfamily; IPR026960_Reverse transcriptase zinc-binding domain; IPR000477_Reverse transcriptase domain	AT3G24255.5	.	RNA-directed DNA polymerase (reverse transcriptase)-related family protein	0.3	1.09	2.19	0.71	0.86	0.88	5.42	2.93	2.42	0.09	0.09	0.13	0.39	0.23	0.14	0.57	0.3	0.04	-2.1111	1.09203e-07	3.09611e-06	0.261884	0.498109	0.710675	2.37298	1.27209e-09	5.29923e-08	-2.07343	2.00632e-05	0.000218131	-1.22237	0.00558545	0.04002	-1.83573	4.24456e-05	0.000400401
Rg_000632	Alpha/beta hydrolase [Handroanthus impetiginosus]	IPR029058_Alpha/Beta hydrolase fold; IPR003675_CAAX prenyl protease 2	AT2G03140.12	.	alpha/beta-Hydrolases superfamily protein	0.39	1.4	2.48	3.89	4.35	4.83	2.14	2.74	2.25	4.73	11.17	6.36	5.78	6.11	5.91	3.38	4.37	0.75	0.011712	0.964014	0.998315	-0.613541	0.0201327	0.0771525	-0.625253	0.0144731	0.0566874	1.60173	1.32313e-10	3.55712e-09	-0.295061	0.249705	0.553362	0.295303	0.239739	0.473026
Rg_000633	protein TIME FOR COFFEE [Sesamum indicum]	.	AT3G22380.1	TIC	time for coffee	1.1	6.5	13.17	24.92	31.27	25.5	14.32	18	16.9	10.79	15.21	11.76	22.66	20.81	24.13	17.05	35.05	3.42	0.55813	0.0152685	0.0566227	0.0977669	0.671745	0.841931	-0.460363	0.0434333	0.129139	-0.239727	0.293352	0.560818	-0.413941	0.0699899	0.253078	-0.419879	0.0653134	0.190781
Rg_000634	protein TSS [Sesamum indicum]	IPR011990_Tetratricopeptide-like helical domain superfamily; IPR033646_CLU central domain; IPR019734_Tetratricopeptide repeat	AT1G15290.1	.	Tetratricopeptide repeat (TPR)-like superfamily protein	0	0	0	0.02	0.04	0	0	0	0	0.11	0.08	0	0.14	0.43	1.63	0.15	0.14	0	1.78122	0.378313	0.572278	0	1	1	-2.77817	0.169412	0.338597	2.4263	0.149912	0.36626	1.94464	0.253314	0.557659	4.93161	0.00277474	0.0152203
Rg_000635	hypothetical protein VITISV_041073 [Vitis vinifera]	IPR012337_Ribonuclease H-like superfamily; IPR013103_Reverse transcriptase, RNA-dependent DNA polymerase; IPR001584_Integrase, catalytic core; IPR025724_GAG-pre-integrase domain	AT4G23160.3	CRK8	cysteine-rich RECEPTOR-like kinase	0.02	0.22	0.56	1.72	1.75	1.35	0.56	0.79	0.26	0.46	0.75	0.65	1.26	0.81	1.27	2.44	3.22	0.2	1.20298	0.00130156	0.00813421	-0.158196	0.687118	0.852256	-1.36118	0.00011006	0.00108561	-0.488541	0.155773	0.375763	0.302447	0.366803	0.677229	-0.667281	0.0494776	0.154542
Rg_000636	Myosin class V heavy chain [Handroanthus impetiginosus]	IPR001609_Myosin head, motor domain; IPR027417_P-loop containing nucleoside triphosphate hydrolase; IPR002710_Dilute domain; IPR000048_IQ motif, EF-hand binding site; IPR004009_Myosin, N-terminal, SH3-like	AT1G04160.1	XIB	myosin XI B	0	0	1.37	0	0.45	0.24	6.28	5.63	0.99	0.22	1.05	0.35	0	0	0.28	0.31	0.18	0	-1.58782	0.464492	0.653005	2.75677	0.202274	0.402288	4.3446	0.0444233	0.131275	1.98522	0.359158	0.63092	-0.720364	0.742134	0.927234	-1.35983	0.534743	0.758347
Rg_000637	hypothetical protein [Beta vulgaris subsp. vulgaris]	IPR012337_Ribonuclease H-like superfamily; IPR000477_Reverse transcriptase domain; IPR002156_Ribonuclease H domain; IPR026960_Reverse transcriptase zinc-binding domain; IPR036691_Endonuclease/exonuclease/phosphatase superfamily	AT4G29090.1	.	Ribonuclease H-like superfamily protein	0.4	0.82	2.24	0.7	0.56	0.45	7.28	6.35	0.2	0.16	0.23	0.09	1.42	1.11	0.66	0.62	0.77	0.05	-2.6765	0.000179032	0.00160684	0.482625	0.493112	0.706406	3.15912	8.66015e-06	0.00012412	-0.946993	0.205604	0.449978	-0.23015	0.753661	0.932348	0.746155	0.29818	0.54187
Rg_000638	sister chromatid cohesion protein PDS5 homolog A isoform X2 [Sesamum indicum]	IPR016024_Armadillo-type fold	AT5G47690.3	.	binding protein	0	0.88	0.83	0.72	0.46	0	0.47	1.1	0.36	0.38	0.66	0	1.01	0.72	0	0.57	0.29	0	-1.94187	0.272069	0.460894	-0.987327	0.576081	0.775109	0.954541	0.589069	0.759623	0.715392	0.686054	0.882248	-0.546933	0.758861	0.934856	0.419117	0.81269	0.934843
Rg_000639	uncharacterized protein LOC111987139 [Quercus suber]	.	AT2G06105.1	.	aspartyl protease gag-polyprotein	0.07	0.62	0.86	0.46	0.59	0.54	1.32	1.16	0.35	1.12	1.91	1.49	1.82	1.55	1.68	1.39	2.25	0.22	-1.46888	0.000103433	0.00101748	-0.459413	0.214718	0.418949	1.00947	0.0062949	0.0296285	2.36037	6.80052e-11	1.90461e-09	1.41487	0.00012922	0.00186463	1.50457	3.57953e-05	0.000343815
Rg_000640	Intermediate filament-like protein [Handroanthus impetiginosus]	IPR001683_Phox homologous domain; IPR003114_Phox-associated domain; IPR036871_PX domain superfamily	AT1G15240.1	.	phox (PX) domain-containing protein	0.12	0.13	0.92	0.73	0.56	0.32	2.2	3	1.2	0.39	0.53	0.42	0.8	0.65	0.32	0.53	0.97	0.09	-1.01066	0.021639	0.0736332	1.20811	0.00448903	0.023863	2.21876	9.70699e-08	2.46372e-06	0.6424	0.138993	0.348241	0.146171	0.741373	0.92691	-0.0134431	0.975438	1
Rg_000641	brefeldin A-inhibited guanine nucleotide-exchange protein 5 isoform X1 [Sesamum indicum] XP_020551181.1 brefeldin A-inhibited guanine nucleotide-exchange protein 5 isoform X1 [Sesamum indicum]	IPR032817_Mon2, C-terminal; IPR000904_Sec7 domain; IPR016024_Armadillo-type fold; IPR032629_Mon2, dimerisation and cyclophilin-binding domain; IPR032691_Guanine nucleotide exchange factor, N-terminal; IPR035999_Sec7 domain superfamily; IPR015403_Sec7, C-terminal	AT3G43300.3	ATMIN7	HOPM interactor 7	4.2	18.02	38.01	46.4	48.32	47.14	58.59	58.73	25.87	10.75	12.96	14.18	35.42	31.07	24.81	33.53	61.46	5.56	-0.25031	0.219652	0.399202	-0.0345034	0.865696	0.967072	0.215807	0.288151	0.483667	-1.01642	6.57991e-07	9.7574e-06	-0.384854	0.0589909	0.225274	-0.792937	9.88778e-05	0.000848403
Rg_000642	hypothetical protein GIB67_021730 [Kingdonia uniflora] KAF6145475.1 hypothetical protein GIB67_020724 [Kingdonia uniflora] KAF6151617.1 hypothetical protein GIB67_012976 [Kingdonia uniflora] KAF6151620.1 hypothetical protein GIB67_012979 [Kingdonia uniflora] KAF6165009.1 hypothetical protein GIB67_010865 [Kingdonia uniflora]	IPR007081_RNA polymerase Rpb1, domain 5	ATCG00170.1	RPOC2	DNA-directed RNA polymerase family protein	0	0	0	0	0	0	0	0	0	0	0	0	0	0	0	0	0	0	NA	NA	NA	NA	NA	NA	NA	NA	NA	NA	NA	NA	NA	NA	NA	NA	NA	NA
Rg_000643	RNA-directed DNA polymerase (reversetranscriptase)-related family protein [Striga asiatica]	IPR000477_Reverse transcriptase domain	AT1G43760.1	.	DNAse I-like superfamily protein	0.2	1.07	1.28	1.12	1.19	0.97	2.44	2.42	0	0.81	2.74	0.98	2.59	2	2.27	1.32	2.42	0.19	-1.28547	0.115159	0.253007	-0.602567	0.45975	0.67697	0.682899	0.401191	0.601237	1.27859	0.115735	0.307686	0.3295	0.686704	0.899177	0.916649	0.259235	0.497194
Rg_000644	PREDICTED: SNF2 domain-containing protein CLASSY 4-like [Erythranthe guttata]	IPR001650_Helicase, C-terminal; IPR027417_P-loop containing nucleoside triphosphate hydrolase; IPR014001_Helicase superfamily 1/2, ATP-binding domain; IPR000330_SNF2-related, N-terminal domain	AT1G05490.1	chr31	chromatin remodeling 31	0.07	0.4	0.56	0.97	1.27	0.54	0.79	0.82	1.81	1.46	2.82	1.37	6.95	5.58	7.13	1.51	2.33	0.42	-0.182357	0.701152	0.840512	0.476366	0.314441	0.536025	0.658723	0.148671	0.309446	1.8834	3.07282e-05	0.000318333	1.01297	0.0265806	0.129143	2.68529	2.14505e-09	4.64771e-08
Rg_000645	squamosa promoter-binding-like protein 14 [Sesamum indicum]	IPR036893_SBP domain superfamily; IPR004333_SBP domain; IPR036770_Ankyrin repeat-containing domain superfamily	AT1G76580.1	.	Squamosa promoter-binding protein-like (SBP domain) transcription factor family protein	0.83	2.92	7.97	8.06	7.95	9.18	12.39	13.14	3.1	4.29	5.91	4.37	12.08	12.27	9.98	10.1	13.7	1.36	-0.339765	0.282757	0.473206	0.00710918	0.982075	1	0.346875	0.268896	0.461501	0.0847676	0.787748	0.937653	0.128289	0.683734	0.897777	0.292149	0.351638	0.599789
Rg_000646	hypothetical protein GIB67_021730 [Kingdonia uniflora] KAF6145475.1 hypothetical protein GIB67_020724 [Kingdonia uniflora] KAF6151617.1 hypothetical protein GIB67_012976 [Kingdonia uniflora] KAF6151620.1 hypothetical protein GIB67_012979 [Kingdonia uniflora] KAF6165009.1 hypothetical protein GIB67_010865 [Kingdonia uniflora]	IPR007081_RNA polymerase Rpb1, domain 5	ATCG00170.1	RPOC2	DNA-directed RNA polymerase family protein	0.48	0.76	2.3	0.64	0.67	1.22	1.4	1.11	1.39	0.74	0.98	0.98	1.9	2.56	2.02	1.67	2.3	0.31	-2.14425	1.07459e-09	5.7958e-08	-1.2607	0.000282861	0.00247848	0.883555	0.0121271	0.0493529	0.958072	0.00699008	0.0354369	0.975657	0.00601396	0.0423498	1.1911	0.000651015	0.00441018
Rg_000647	RNA-directed DNA polymerase-like protein [Striga asiatica]	IPR026960_Reverse transcriptase zinc-binding domain; IPR000477_Reverse transcriptase domain; IPR036691_Endonuclease/exonuclease/phosphatase superfamily	ATMG01250.1	ORF102	RNA-directed DNA polymerase (reverse transcriptase)	0.1	0.42	1.05	0.27	0.5	0.21	0.75	0.53	0	0.42	0.12	0.25	1.81	1.25	1.52	0.7	0.72	0.06	-2.13884	0.00432929	0.0211313	-1.60598	0.031845	0.108998	0.532867	0.47971	0.671289	0.679642	0.369562	0.641056	0.680871	0.369057	0.679338	2.0752	0.00513308	0.0253491
Rg_000648	putative dehydrogenase [Handroanthus impetiginosus]	IPR000771_Fructose-bisphosphate aldolase, class-II; IPR031475_Nucleotide-binding C-terminal domain; IPR006115_6-phosphogluconate dehydrogenase, NADP-binding; IPR036291_NAD(P)-binding domain superfamily; IPR010737_Four-carbon acid sugar kinase, N-terminal domain; IPR029154_3-hydroxyisobutyrate dehydrogenase, NAD-binding domain; IPR008927_6-phosphogluconate dehydrogenase-like, C-terminal domain sup…	AT1G18270.2	.	ketose-bisphosphate aldolase class-II family protein	0.37	2.08	3.7	8.71	7.58	5.99	6.26	6.54	4.37	3.77	4.57	3.13	10.55	6.71	10.29	4.03	8.47	0.54	0.34592	0.165236	0.328133	0.219076	0.381815	0.605772	-0.126844	0.601785	0.769595	-0.0571557	0.814851	0.951187	-0.752967	0.00232775	0.0201657	0.171015	0.479948	0.716755
Rg_000649	polyprotein [Broad bean wilt virus 2]	IPR001205_RNA-directed RNA polymerase, C-terminal domain; IPR000199_Peptidase C3A/C3B, picornaviral; IPR000605_Helicase, superfamily 3, single-stranded DNA/RNA virus; IPR009003_Peptidase S1, PA clan; IPR027417_P-loop containing nucleoside triphosphate hydrolase	AT4G02790.1	EMB3129	GTP-binding family protein	23.41	0.81	1080.49	7.44	5.52	1316	3447.1	1145.09	5.81	8.37	4.07	743.65	8.34	7.31	730.26	5.3	6.7	100.05	-0.455538	0.842672	0.92996	1.40498	0.540441	0.746611	1.86052	0.417585	0.616667	0.00485272	0.998313	1	-1.15998	0.613282	0.856722	-0.985188	0.66775	0.851512
Rg_000650	Retrovirus-related Pol polyprotein from transposon TNT 1-94 [Vitis vinifera]	IPR001584_Integrase, catalytic core; IPR013103_Reverse transcriptase, RNA-dependent DNA polymerase; IPR012337_Ribonuclease H-like superfamily	AT4G23160.3	CRK8	cysteine-rich RECEPTOR-like kinase	0	0	0	0	0	0	1.49	1.11	7.35	2.83	1.22	2.88	0	0	0.55	0.61	1.64	0.18	0	1	1	9.43411	5.97141e-06	8.95024e-05	10.8118	2.12015e-07	4.90911e-06	10.7774	2.32372e-07	3.77115e-06	8.5118	4.56376e-05	0.000766606	6.14203	0.0034321	0.0181404
Rg_000651	protein TSS [Sesamum indicum]	IPR011990_Tetratricopeptide-like helical domain superfamily	AT1G15290.1	.	Tetratricopeptide repeat (TPR)-like superfamily protein	0.13	1.12	0.66	0.66	0.87	1.57	0.3	0.54	1.22	2.18	0.63	7.69	2.56	3.18	10.82	0.88	1.27	0.24	-1.00916	0.230848	0.412717	-1.2475	0.140058	0.314328	-0.238346	0.777207	0.892976	2.67119	0.00138244	0.00914444	0.00338421	0.9968	1	2.29199	0.00605681	0.0290794
Rg_000652	zinc finger CCCH domain-containing protein 19 [Sesamum indicum]	IPR036128_Plus3-like superfamily; IPR019835_SWIB domain; IPR035445_GYF-like domain superfamily; IPR004343_Plus-3 domain; IPR036885_SWIB/MDM2 domain superfamily; IPR011011_Zinc finger, FYVE/PHD-type; IPR001965_Zinc finger, PHD-type; IPR003121_SWIB/MDM2 domain; IPR003169_GYF domain	AT2G16485.2	NERD	GW repeat- and PHD finger-containing protein NERD	1.21	3.85	9.05	14.99	15.77	15.12	13.11	14.65	8.8	4.86	4.34	5.69	12.93	10.7	10.09	6.71	13.18	1.99	0.162426	0.451511	0.641338	0.0625451	0.772539	0.908799	-0.0998807	0.638785	0.798033	-0.716058	0.000863647	0.0060963	-0.738066	0.000603236	0.00674108	-0.599123	0.00499895	0.0248029
Rg_000653	histone-lysine N-methyltransferase ASHH2 isoform X1 [Sesamum indicum]	IPR006560_AWS domain; IPR001214_SET domain; IPR011124_Zinc finger, CW-type; IPR003616_Post-SET domain	AT1G77300.1	EFS	histone-lysine N-methyltransferase	0.46	2.3	4.22	8.92	8.86	7.82	16.27	17.16	9.98	3.62	5.97	4.2	8.96	8.14	7.56	5.55	10.72	0.9	0.349809	0.0388885	0.114147	1.34179	1.54841e-15	1.72415e-13	0.99198	4.65887e-10	2.17031e-08	-0.0236549	0.884722	0.986135	-0.474245	0.00414518	0.0317703	-0.201905	0.212258	0.436777
Rg_000654	hypothetical protein MIMGU_mgv1a020014mg [Erythranthe guttata]	IPR036426_Bulb-type lectin domain superfamily; IPR011009_Protein kinase-like domain superfamily; IPR001480_Bulb-type lectin domain; IPR000719_Protein kinase domain; IPR003609_PAN/Apple domain; IPR001245_Serine-threonine/tyrosine-protein kinase, catalytic domain; IPR024171_S-receptor-like serine/threonine-protein kinase; IPR021820_S-locus receptor kinase, C-terminal; IPR000858_S-locus glycoprotein…	AT4G27290.2	.	S-locus lectin protein kinase family protein	0.07	0.45	0.72	1.75	1.97	1.65	1.52	2.37	4.47	3.08	9.77	3.48	0.27	0.68	1.33	0.88	1.35	0.26	0.627263	0.294499	0.48564	1.6177	0.00672712	0.0328863	0.990438	0.0877935	0.214139	2.41623	2.96358e-05	0.000308423	-0.685134	0.24601	0.548643	-1.33468	0.0240187	0.0888043
Rg_000655	bromodomain and WD repeat-containing protein 3 isoform X1 [Sesamum indicum]	IPR001487_Bromodomain; IPR036427_Bromodomain-like superfamily; IPR001680_WD40 repeat	AT2G47410.4	.	WD40 domain-containing protein	0	0.69	2.05	0.57	1.46	1.64	0	0.95	1.11	0.14	0.84	0.28	1.29	1.06	1.72	1.83	0.49	0	-0.56299	0.683786	0.828158	-1.08952	0.431435	0.651309	-0.526531	0.703132	0.845857	-0.801472	0.562748	0.802239	-0.798528	0.564323	0.825461	-0.021922	0.987323	1
Rg_000656	PREDICTED: LOW QUALITY PROTEIN: uncharacterized protein LOC105972773 [Erythranthe guttata]	IPR036322_WD40-repeat-containing domain superfamily; IPR001680_WD40 repeat	AT3G50590.2	.	Transducin/WD40 repeat-like superfamily protein	1.06	4.74	12.15	18.26	17.64	18.02	17.29	17.55	12.16	6.31	8.1	7.97	23.56	21.91	20.43	19.61	36.24	2.72	0.172004	0.287661	0.478571	0.215189	0.184817	0.379153	0.0431843	0.784933	0.897679	-0.383746	0.0164238	0.0707373	0.172501	0.277393	0.585726	0.140275	0.374473	0.622699
Rg_000657	hypothetical protein PHJA_001509800 [Phtheirospermum japonicum]	.	.	.	.	0	0	0	0.35	0.59	0.13	0	0	0	0	0.12	0.17	0	0	0.09	1.29	0.67	0	5.73662	0.0108901	0.0435535	0	1	1	-6.73359	0.00280192	0.0155367	-1.03041	0.596477	0.827071	0.713328	0.711497	0.91141	-3.56503	0.0779064	0.217234
Rg_000658	uncharacterized protein LOC113749274 [Coffea eugenioides]	IPR036691_Endonuclease/exonuclease/phosphatase superfamily; IPR000477_Reverse transcriptase domain	AT4G29090.1	.	Ribonuclease H-like superfamily protein	0	0	0	6.38	4.6	5.86	0	1.32	0	1.39	3.47	1.83	3.61	2.87	3.16	2.81	5.19	0.63	9.72253	NA	NA	6.09301	NA	NA	-3.62952	NA	NA	-0.488627	NA	NA	-0.725883	NA	NA	-0.94997	NA	NA
Rg_000659	hypothetical protein PHJA_000390700 [Phtheirospermum japonicum]	0	.	.	.	0.86	2.72	6.64	10.13	8.85	9.14	7.76	9.82	8.62	2.83	3.48	3.65	8.8	8.65	6.55	4.77	11.38	0.99	-0.0717381	0.709989	0.846774	0.0969066	0.616387	0.803867	0.168645	0.370757	0.571072	-0.601944	0.00176195	0.011223	-0.599694	0.00184445	0.0166508	-0.378153	0.0460558	0.146287
Rg_000660	hypothetical protein VITISV_041073 [Vitis vinifera]	IPR013103_Reverse transcriptase, RNA-dependent DNA polymerase; IPR012337_Ribonuclease H-like superfamily; IPR001584_Integrase, catalytic core	AT5G53850.1	.	haloacid dehalogenase-like hydrolase family protein	0.06	0.56	1.1	3.82	3.37	4.31	0.64	1.1	0.91	1.28	1.92	1.55	2.73	1.89	2.18	2.99	4.56	0.67	1.31841	4.27068e-06	7.03328e-05	-0.548878	0.070051	0.193618	-1.86728	1.84228e-11	1.19671e-09	-0.407327	0.126518	0.327	-0.202012	0.446363	0.743254	-0.918126	0.000572513	0.00394166
Rg_000661	uncharacterized protein LOC105180271 [Sesamum indicum]	IPR036691_Endonuclease/exonuclease/phosphatase superfamily; IPR000477_Reverse transcriptase domain; IPR026960_Reverse transcriptase zinc-binding domain	AT3G24255.5	.	RNA-directed DNA polymerase (reverse transcriptase)-related family protein	0.69	1.48	4.62	51.71	33.15	46.86	20.22	35.76	20.06	6.55	6.51	7.27	13.78	9.71	11.68	19.13	24.3	2.75	2.71642	2.70226e-30	6.66271e-27	2.1582	1.19052e-19	2.53672e-17	-0.558222	0.0148146	0.0576764	-1.78666	1.05201e-14	4.712e-13	-1.32822	8.1399e-09	3.65079e-07	-2.05023	6.04263e-19	4.41445e-17
Rg_000662	hypothetical protein F511_08762 [Dorcoceras hygrometricum]	IPR005162_Retrotransposon gag domain; IPR000477_Reverse transcriptase domain; IPR041588_Integrase zinc-binding domain; IPR016197_Chromo-like domain superfamily; IPR001584_Integrase, catalytic core; IPR012337_Ribonuclease H-like superfamily; IPR041577_Reverse transcriptase/retrotransposon-derived protein, RNase H-like domain; IPR021109_Aspartic peptidase domain superfamily	ATMG00860.1	ORF158	DNA/RNA polymerases superfamily protein	0.14	0.48	0.67	1.05	1.03	1.28	0.93	0.78	0.28	0.28	0.1	0.14	0.52	0.72	0.47	0.35	0.65	0.04	-0.333304	0.440836	0.631803	-0.904695	0.0406817	0.130788	-0.571391	0.182865	0.357086	-1.7822	0.000140728	0.00123787	-1.60936	0.000455306	0.00534726	-1.13255	0.00943313	0.0419471
Rg_000663	RNA helicase family protein [Striga asiatica]	IPR016024_Armadillo-type fold	AT4G18465.1	.	RNA helicase family protein	0.39	1.05	2.22	1.61	1.71	1.42	2.49	3.12	1.9	1.03	1.56	1.12	2.4	2.45	1.61	1.76	2.58	0.16	-1.25274	1.99326e-08	7.17832e-07	-0.351093	0.109293	0.265197	0.901644	3.16142e-05	0.000376728	0.522326	0.0196533	0.0815831	-0.0251856	0.912865	0.995388	0.290728	0.188083	0.403308
Rg_000664	delta-1-pyrroline-5-carboxylate synthase [Sesamum indicum]	IPR036393_Acetylglutamate kinase-like superfamily; IPR011529_Glutamate 5-kinase; IPR005715_Glutamate 5-kinase/delta-1-pyrroline-5-carboxylate synthase; IPR001048_Aspartate/glutamate/uridylate kinase; IPR001057_Glutamate/acetylglutamate kinase	AT2G39800.4	P5CS1	delta1-pyrroline-5-carboxylate synthase 1	0.11	0.46	1.62	2.58	3.09	1.93	4.98	4.37	3.08	0.88	0.8	1.22	1.73	1.19	1.66	1.69	2.53	0.22	0.444523	0.136195	0.285776	1.39626	2.46155e-06	4.0733e-05	0.951736	0.000607708	0.0044831	-0.478137	0.0986643	0.275003	-0.671084	0.0213724	0.11061	-0.875028	0.00240217	0.0134527
Rg_000665	nuclear receptor corepressor 1 [Phtheirospermum japonicum]	IPR001005_SANT/Myb domain; IPR009057_Homeobox-like domain superfamily	AT3G52250.1	.	Duplicated homeodomain-like superfamily protein	0.45	1.69	4.39	1.07	0.46	0.34	4.5	4.57	6.18	0.1	0.52	0.41	0.74	0.11	0.6	0.31	0.91	0.16	-3.30346	5.17875e-08	1.63179e-06	0.0874666	0.883143	0.978048	3.39093	1.9886e-08	6.06951e-07	0.0167711	0.978603	1	0.0385406	0.950859	1	-0.486579	0.436372	0.68017
Rg_000666	protein phosphatase 2C family protein, partial [Striga asiatica]	IPR013216_Methyltransferase type 11; IPR029063_S-adenosyl-L-methionine-dependent methyltransferase; IPR006342_Methyltransferase FkbM	AT5G01710.1	.	methyltransferase	0.57	2.62	3.98	9.86	16.45	7.42	8.77	8.18	8.12	4.87	9.37	4.18	15.41	18.37	19.31	7.06	9.74	0.75	0.633041	0.0546071	0.146706	0.477409	0.148009	0.326165	-0.155632	0.632036	0.793035	-0.0228349	0.944054	1	-0.886789	0.00678215	0.0465818	0.51635	0.111194	0.280664
Rg_000667	callose synthase 3 isoform X2 [Sesamum indicum]	IPR026899_1,3-beta-glucan synthase subunit FKS1-like, domain-1; IPR003440_Glycosyl transferase, family 48	AT5G13000.1	GSL12	glucan synthase-like 12	0.12	0.32	1.4	2.45	1.91	2.18	2.93	1.84	2.31	5.51	4.42	5.53	4.48	5.03	5.94	4.38	8.61	0.81	0.465121	0.158416	0.318616	0.864934	0.00874526	0.0403682	0.399813	0.196856	0.375224	2.16347	1.37829e-12	4.79901e-11	1.214	8.18568e-05	0.00127134	1.11288	0.000283828	0.00214019
Rg_000668	PREDICTED: 65-kDa microtubule-associated protein 1-like [Erythranthe guttata] EYU27387.1 hypothetical protein MIMGU_mgv1a003477mg [Erythranthe guttata]	.	AT5G55230.2	MAP65-1	microtubule-associated proteins 65-1	0.05	0.23	0.19	0.86	1	0.84	0.39	0.4	0.32	0.23	0.18	0.29	0.68	0.55	0.59	0.79	0.88	0.08	0.738131	0.0513835	0.140545	-0.297322	0.459475	0.676696	-1.03545	0.0036374	0.0191767	-1.02514	0.00554457	0.0293939	-0.520662	0.13866	0.392368	-0.713641	0.0392201	0.129709
Rg_000669	acetyl-CoA carboxylase 1-like isoform X1 [Sesamum indicum]	IPR034733_Acetyl-CoA carboxylase; IPR029045_ClpP/crotonase-like domain superfamily; IPR013537_Acetyl-CoA carboxylase, central domain	AT1G36160.2	ACC1	acetyl-CoA carboxylase 1	0.4	0	0.28	1.23	0	0	0.85	1.9	0.37	0.76	0.74	0.53	2.46	0	1.28	8.34	0.2	0.06	-2.17286	0.322535	0.514966	-0.554972	0.800232	0.925465	1.61789	0.461046	0.654947	1.76454	0.421531	0.688437	2.96374	0.176689	0.453157	1.54898	0.480339	0.717121
Rg_000670	zinc finger CCCH domain-containing protein 44-like isoform X2 [Sesamum indicum] XP_011090428.1 zinc finger CCCH domain-containing protein 44-like isoform X1 [Sesamum indicum]	IPR036128_Plus3-like superfamily; IPR035445_GYF-like domain superfamily; IPR036855_Zinc finger, CCCH-type superfamily; IPR004343_Plus-3 domain; IPR003169_GYF domain; IPR036885_SWIB/MDM2 domain superfamily; IPR001965_Zinc finger, PHD-type; IPR019835_SWIB domain; IPR011011_Zinc finger, FYVE/PHD-type; IPR003121_SWIB/MDM2 domain	AT3G51120.1	.	zinc finger CCCH domain-containing protein 44	1.08	4.22	9.33	13.18	13.11	15.72	30.68	32.91	14.84	3.43	5.68	4.59	11.8	11.69	10.75	6.91	13.81	1.61	0.0251387	0.904241	0.96566	1.12587	6.52313e-08	1.61992e-06	1.10073	7.65958e-08	1.99578e-06	-0.755513	0.00029474	0.00238153	-0.704823	0.000732853	0.00788405	-0.448756	0.0298255	0.105005
Rg_000671	UDP-glucose:glycoprotein glucosyltransferase [Handroanthus impetiginosus]	IPR040694_UGGT, thioredoxin-like domain 2; IPR040692_UGGT, thioredoxin-like domain 3; IPR040525_UDP-glucose:glycoprotein glucosyltransferase, thioredoxin-like domain 4; IPR040693_UGGT, thioredoxin-like domain 1	AT1G71220.3	EBS1	EMS-MUTAGENIZED BRI1 SUPPRESSOR 1	0	0	0	0.77	0.87	0	0	0.16	0	0.12	0	0.17	0.6	0.78	0.25	0.93	0.75	0.1	6.32554	0.00120885	0.00765364	3.14179	0.117163	0.27858	-3.18375	0.0505627	0.144203	-1.42765	0.368291	0.639828	0.363402	0.816707	0.960169	-0.148111	0.924715	0.987306
Rg_000672	CTL-like protein DDB_G0274487 [Sesamum indicum]	IPR007603_Choline transporter-like	AT1G25500.2	.	Plasma-membrane choline transporter family protein	0.06	0.2	0.61	1.39	1.68	1.14	0.27	0.51	0.58	0.33	1.01	0.74	1.71	1.57	1.28	1.26	2.63	0.18	0.828224	0.036165	0.10805	-0.511155	0.218459	0.423681	-1.33938	0.000457326	0.00354333	-0.176765	0.632671	0.850183	-0.00587909	0.987247	1	-0.0365294	0.919828	0.985123
Rg_000673	WD repeat-containing protein 26-like isoform X1 [Sesamum indicum] XP_011100493.1 WD repeat-containing protein 26-like isoform X1 [Sesamum indicum] XP_011100495.1 WD repeat-containing protein 26-like isoform X1 [Sesamum indicum] XP_011100497.1 WD repeat-containing protein 26-like isoform X1 [Sesamum indicum] XP_020555032.1 WD repeat-containing protein 26-like isoform X1 [Sesamum indicum]	.	AT5G08560.1	.	transducin family protein / WD-40 repeat family protein	0.04	0.12	0.3	1.06	0.77	0.7	0.45	0.72	0.39	0.3	0.52	0.44	0.7	0.65	0.44	0.99	0.94	0.09	0.90153	0.0114334	0.0452047	0.454854	0.217788	0.422847	-0.446675	0.147015	0.307091	-0.11794	0.704157	0.892889	-0.180153	0.560464	0.822901	-0.648395	0.0370257	0.124053
Rg_000674	putative dehydrogenase [Handroanthus impetiginosus]	IPR008927_6-phosphogluconate dehydrogenase-like, C-terminal domain superfamily; IPR036291_NAD(P)-binding domain superfamily; IPR006115_6-phosphogluconate dehydrogenase, NADP-binding; IPR029154_3-hydroxyisobutyrate dehydrogenase, NAD-binding domain	AT1G18270.2	.	ketose-bisphosphate aldolase class-II family protein	0.24	0.47	3.43	8.96	8.11	10.56	15.86	14.38	6.47	2.03	2.46	2.26	4.84	5.96	4.94	3.73	8.16	0.96	1.51508	4.28416e-05	0.000489273	2.12449	9.47558e-09	2.87041e-07	0.609406	0.0896814	0.217277	-1.14989	0.00155952	0.0101321	-0.885416	0.0146637	0.0839121	-0.960354	0.00786295	0.0361595
Rg_000675	hypothetical protein PHJA_001509800 [Phtheirospermum japonicum]	.	.	.	.	0.2	0.66	2.07	6.3	5	6.81	4.43	4.87	0	1.78	2.31	2.28	2.33	2.45	2.09	2	4.89	0.34	1.22915	0.144484	0.297939	0.374956	0.656724	0.831437	-0.854197	0.307769	0.505808	-0.623526	0.456727	0.71887	-1.30179	0.12103	0.361495	-1.54692	0.0651086	0.190355
Rg_000676	Rho GTPase effector BNI1 [Handroanthus impetiginosus]	IPR015425_Formin, FH2 domain; IPR014020_Tensin phosphatase, C2 domain	AT5G07740.3	.	actin binding protein	0.36	1.71	3.86	9.24	9.01	10.1	4.72	5.66	5.5	3.15	3.85	3.74	10.43	9.82	9.14	10.47	12.69	1.3	0.794557	3.78655e-05	0.000441351	0.227453	0.244505	0.456521	-0.567104	0.00214324	0.0125411	-0.515182	0.00567535	0.0299401	-0.0706285	0.701943	0.907245	-0.0993052	0.587233	0.797187
Rg_000677	polyprotein [Broad bean wilt virus 2]	IPR027417_P-loop containing nucleoside triphosphate hydrolase; IPR000605_Helicase, superfamily 3, single-stranded DNA/RNA virus; IPR009003_Peptidase S1, PA clan	AT1G27600.2	IRX9-L	Nucleotide-diphospho-sugar transferases superfamily protein	0	0	0	0	0	0	0	0	0	0	0.07	0	0.36	0.39	0.06	0	0	0	0	1	1	0	1	1	0	1	1	3.67641	0.373959	0.645563	0	1	1	6.57235	0.106978	0.27304
Rg_000678	Niemann-Pick C1 protein [Sesamum indicum]	IPR003392_Protein patched/dispatched; IPR032190_Niemann-Pick C1, N-terminal; IPR004765_NPC1-like	AT1G42470.1	.	Patched family protein	0.07	0.15	0.57	0.71	0.67	0.77	0.63	0.79	0.37	0.07	0.2	0.12	0.58	0.93	0.3	0.51	0.89	0.18	-0.0472169	0.916316	0.972157	-0.102343	0.82206	0.939891	-0.0551261	0.897871	0.962229	-1.64143	0.000810922	0.00576953	-0.0353672	0.935313	1	-0.430203	0.321554	0.567751
Rg_000679	proteasome-associated protein ecm29 homolog [Phtheirospermum japonicum]	IPR016024_Armadillo-type fold; IPR024372_Proteasome component Ecm29	AT2G26780.2	.	ARM repeat superfamily protein	0.76	4.28	8.87	12.29	9.7	9.43	13.45	14.12	9.05	6.61	7.48	6.52	10.58	11.06	10.21	8.19	15.94	2.01	-0.274379	0.15081	0.307504	0.191891	0.314857	0.536412	0.46627	0.0127391	0.051294	0.295028	0.117258	0.31056	-0.00984749	0.958522	1	-0.115377	0.539643	0.761952
Rg_000680	mRNA processing protein [Handroanthus impetiginosus]	IPR011990_Tetratricopeptide-like helical domain superfamily	AT5G46400.2	PRP39-2	Tetratricopeptide repeat (TPR)-like superfamily protein	0.11	0.39	0.95	1.83	1.59	1.99	1.41	1.48	0.49	0.72	0.51	0.6	1.05	1.48	1.04	1.71	1.78	0.3	0.392431	0.249074	0.434082	-0.0955879	0.783114	0.914787	-0.488019	0.134377	0.288586	-0.644841	0.0530413	0.175271	-0.214896	0.511723	0.790199	-0.745458	0.0229265	0.0856192
Rg_000681	hypothetical protein CDL12_09445 [Handroanthus impetiginosus]	IPR026854_Vacuolar protein sorting-associated protein 13, N-terminal domain; IPR031646_Vacuolar protein sorting-associated protein 13, second N-terminal domain; IPR001849_Pleckstrin homology domain; IPR031642_VPS13, repeated coiled region	AT4G17140.3	.	pleckstrin homology (PH) domain-containing protein	0.07	0.6	1.69	3.26	2.74	3.45	1.31	0.96	1.5	0.6	2.23	1.42	1.74	1.65	1.8	0.44	3.25	0.3	0.735559	0.166332	0.329508	-0.289751	0.589105	0.784384	-1.02531	0.0506175	0.144315	-0.330181	0.52786	0.776588	-1.08827	0.0392806	0.170214	-1.01272	0.0532139	0.163241
Rg_000682	polyprotein [Broad bean wilt virus 2]	IPR027417_P-loop containing nucleoside triphosphate hydrolase; IPR000605_Helicase, superfamily 3, single-stranded DNA/RNA virus	AT1G09820.1	.	Pentatricopeptide repeat (PPR-like) superfamily protein	0.11	0.14	0.31	2.53	1.73	1.97	1.07	2.06	0.62	0.76	1.88	0.91	1.69	0.83	1.27	0.82	2.03	0.13	1.59465	0.000506166	0.00376513	1.06375	0.021691	0.0816097	-0.530898	0.210815	0.392946	0.0306559	0.942245	1	-1.02703	0.0178568	0.0971071	-0.866378	0.0420174	0.136549
Rg_000683	PREDICTED: uncharacterized protein LOC105971639 [Erythranthe guttata]	IPR036890_Histidine kinase/HSP90-like ATPase superfamily	AT5G24280.2	GMI1	gamma-irradiation and mitomycin c induced 1	0.65	2.76	12.99	11.93	10.26	12.45	9.3	10.56	12.67	3.21	7.64	8.64	4.55	0.02	3.87	5.23	10.4	2.13	-0.094698	0.910776	0.968923	0.114789	0.891963	0.983509	0.209487	0.804009	0.908927	0.0243776	0.97697	1	-0.455598	0.58971	0.84128	-2.19845	0.0093938	0.0418199
Rg_000684	protein TSS [Sesamum indicum]	IPR011990_Tetratricopeptide-like helical domain superfamily; IPR019734_Tetratricopeptide repeat; IPR033646_CLU central domain	AT1G15290.1	.	Tetratricopeptide repeat (TPR)-like superfamily protein	0	3.02	0.03	0.02	0	0	0.05	0.01	0.04	0.28	0.27	3.25	0.47	0.76	5.13	0.16	0.25	0	-8.49974	NA	NA	-6.47198	NA	NA	2.02776	NA	NA	7.96248	NA	NA	3.55957	NA	NA	7.71735	NA	NA
Rg_000685	hypothetical protein MIMGU_mgv1a002536mg [Erythranthe guttata]	IPR000858_S-locus glycoprotein domain; IPR003609_PAN/Apple domain; IPR001480_Bulb-type lectin domain; IPR035446_S-locus-specific glycoprotein/EP1; IPR036426_Bulb-type lectin domain superfamily	AT4G21390.1	B120	S-locus lectin protein kinase family protein	0	0.08	0.07	0.13	0.19	0.15	1.08	0.67	0.25	0.28	0.29	0.11	0.1	0.1	0.28	0.22	0.35	0.07	0.0353727	0.962993	0.997766	2.3058	0.00164722	0.0106343	2.27043	0.000575721	0.00428814	1.44753	0.0324121	0.120131	0.826537	0.231947	0.53121	-0.0473305	0.946461	0.997637
Rg_000686	uncharacterized protein LOC105180271 [Sesamum indicum]	IPR036691_Endonuclease/exonuclease/phosphatase superfamily; IPR026960_Reverse transcriptase zinc-binding domain; IPR000477_Reverse transcriptase domain	AT3G24255.5	.	RNA-directed DNA polymerase (reverse transcriptase)-related family protein	0.22	0.65	2.08	20.4	15.73	24.82	8.31	13.25	28.48	2.91	3.75	4.41	5.77	6.41	6.43	4.66	11.14	1.21	2.93412	6.96339e-11	5.30024e-09	3.02194	1.88737e-11	1.02436e-09	0.0878149	0.841103	0.93068	-1.58087	0.000329092	0.00262575	-1.64828	0.000182776	0.00250864	-1.85728	2.40771e-05	0.000242019
Rg_000687	uncharacterized protein LOC101212255 isoform X1 [Cucumis sativus]	IPR012337_Ribonuclease H-like superfamily; IPR036875_Zinc finger, CCHC-type superfamily; IPR025724_GAG-pre-integrase domain; IPR013103_Reverse transcriptase, RNA-dependent DNA polymerase; IPR001878_Zinc finger, CCHC-type; IPR001584_Integrase, catalytic core	AT4G23160.3	CRK8	cysteine-rich RECEPTOR-like kinase	0.5	1.53	3.22	4.8	6.26	5.22	2.48	3.24	1.32	2.04	1.75	1.99	4.51	3.95	3.5	5.74	7.08	0.93	0.0445076	0.844503	0.930829	-0.961647	3.78765e-05	0.000445286	-1.00616	8.14326e-06	0.000117846	-0.591998	0.00865829	0.0422928	-0.0232713	0.916591	0.996504	-0.60684	0.00636193	0.030303
Rg_000688	PREDICTED: uncharacterized protein LOC107776208 [Nicotiana tabacum]	0	.	.	.	0	0.02	0	0.39	0.47	0.33	0	0.05	0.02	0.11	0	0.22	0.27	0.34	0.19	0.76	1.26	0.03	4.16252	0.00116273	0.00742156	0.306509	0.831528	0.945596	-3.85602	0.000477857	0.00367615	-0.827033	0.366253	0.637829	0.618853	0.486399	0.772542	-0.734186	0.415091	0.660793
Rg_000689	non-LTR retroelement reverse transcriptase-like protein [Striga asiatica]	IPR005135_Endonuclease/exonuclease/phosphatase; IPR000477_Reverse transcriptase domain; IPR036691_Endonuclease/exonuclease/phosphatase superfamily; IPR026960_Reverse transcriptase zinc-binding domain	AT1G43760.1	.	DNAse I-like superfamily protein	3.83	4.64	10.39	9.2	12.76	8.98	4.97	10.09	8.71	3.01	4.01	2.21	7.34	6.73	6.74	36.23	12.5	1.95	-1.2947	0.0120673	0.0471334	-1.40361	0.00654519	0.0322205	-0.108912	0.832806	0.92581	-0.868638	0.0932648	0.264397	0.864263	0.0936526	0.306178	-0.723468	0.161267	0.363694
Rg_000690	hypothetical protein CTI12_AA091260 [Artemisia annua]	IPR013103_Reverse transcriptase, RNA-dependent DNA polymerase	AT4G23160.3	CRK8	cysteine-rich RECEPTOR-like kinase	0	0.03	0.04	0.8	0.63	0.83	0.18	0.24	0.41	0.21	0.22	0.24	0.45	0.4	0.42	0.57	0.93	0.16	3.41734	3.54643e-07	8.43677e-06	2.22925	0.00123496	0.00841609	-1.18809	0.00447201	0.0226744	-0.833883	0.0473862	0.160913	-0.0943321	0.813435	0.95888	-0.973695	0.0173499	0.0687214
Rg_000691	RNA-directed DNA polymerase (reversetranscriptase)-related family protein [Striga asiatica]	IPR026960_Reverse transcriptase zinc-binding domain; IPR000477_Reverse transcriptase domain; IPR036691_Endonuclease/exonuclease/phosphatase superfamily	ATMG00310.1	ORF154	RNA-directed DNA polymerase (reverse transcriptase)-related family protein	0	0	0.01	2.44	2.13	2.9	0	0.44	0	0.78	0.74	1.23	2.72	2.15	2.4	2.86	4.88	0.43	7.61552	2.07593e-08	7.42305e-07	3.62931	0.00887733	0.0408414	-3.9862	8.08639e-07	1.5779e-05	-0.542604	0.476591	0.735227	0.228945	0.763172	0.936856	-0.193181	0.799182	0.927726
Rg_000692	non-LTR retroelement reverse transcriptase-like protein [Striga asiatica]	IPR000477_Reverse transcriptase domain; IPR026960_Reverse transcriptase zinc-binding domain; IPR005135_Endonuclease/exonuclease/phosphatase; IPR036691_Endonuclease/exonuclease/phosphatase superfamily	AT1G43760.1	.	DNAse I-like superfamily protein	1.36	1.24	6.49	5.15	7.39	5.71	4.82	8.12	7.6	1.15	0.35	0.38	2.16	1.19	1.84	8.79	4.97	0.57	-0.701509	0.217626	0.396565	-0.2577	0.65062	0.827793	0.44381	0.434306	0.631451	-2.30192	6.89641e-05	0.000660639	-0.234189	0.680834	0.896169	-1.97733	0.000559975	0.00386647
Rg_000693	protein TSS [Sesamum indicum]	IPR028275_Clustered mitochondria protein, N-terminal; IPR011990_Tetratricopeptide-like helical domain superfamily; IPR019734_Tetratricopeptide repeat; IPR033646_CLU central domain	AT4G28080.1	.	Tetratricopeptide repeat (TPR)-like superfamily protein	0.3	1.23	2.43	1.42	1.18	1.14	2.13	2.03	2.28	1.91	1.42	1.73	3.18	2.69	2.41	1.25	1.51	0.18	-1.63856	9.22134e-11	6.75811e-09	-0.562344	0.0228638	0.0850001	1.07622	1.45425e-05	0.000193559	1.37609	3.27981e-08	6.19999e-07	-0.130843	0.623446	0.862133	1.0124	4.44802e-05	0.000417398
Rg_000694	sister chromatid cohesion protein PDS5 homolog A isoform X2 [Sesamum indicum]	IPR016024_Armadillo-type fold	AT5G47690.3	.	binding protein	1.34	3.89	10.97	13.91	15.96	13.5	13.52	13.31	8.64	6.24	6.83	7.34	12.04	11.02	11.16	6.52	14.2	1.8	-0.0729597	0.707467	0.844963	-0.129049	0.508357	0.718886	-0.0560889	0.769915	0.888928	-0.192564	0.318055	0.5887	-0.692099	0.000372567	0.00453466	-0.490271	0.0108179	0.0469072
Rg_000695	PREDICTED: protein ENHANCED DOWNY MILDEW 2-like isoform X2 [Erythranthe guttata] XP_012830801.1 PREDICTED: protein ENHANCED DOWNY MILDEW 2-like isoform X2 [Erythranthe guttata] EYU42727.1 hypothetical protein MIMGU_mgv1a001144mg [Erythranthe guttata]	IPR022702_DNA (cytosine-5)-methyltransferase 1, replication foci domain; IPR001965_Zinc finger, PHD-type	AT5G55390.3	EDM2	ENHANCED DOWNY MILDEW 2	0	0.09	0.04	0.43	0.89	0.53	0	0.18	0	0.83	0.7	0.4	0.62	0.66	0.92	0.76	0.2	0.09	2.2025	0.0230794	0.0773088	-0.999786	0.343463	0.566844	-3.20228	0.000912133	0.00625931	0.968687	0.265498	0.528349	-0.414938	0.638682	0.871405	0.10968	0.899927	0.97574
Rg_000696	histone-lysine N-methyltransferase SUVR5 [Sesamum indicum]	IPR001214_SET domain; IPR013087_Zinc finger C2H2-type; IPR040689_SUVR5, C2H2-type Zinc finger, 3 repeats; IPR007728_Pre-SET domain	AT2G23740.3	SUVR5	histone-lysine N-methyltransferase SUVR5	0.4	1.36	3.69	6.37	4.98	5.89	4.46	5.01	3.22	2.4	2.2	2.59	6.1	6.86	5.16	4.69	7.66	0.76	0.178782	0.312223	0.50402	-0.0216169	0.904118	0.990732	-0.200399	0.235495	0.423027	-0.347237	0.0441445	0.152513	-0.243574	0.155845	0.421127	-0.0722085	0.666929	0.85104
Rg_000697	uncharacterized protein LOC105180271 [Sesamum indicum]	IPR036691_Endonuclease/exonuclease/phosphatase superfamily; IPR026960_Reverse transcriptase zinc-binding domain; IPR000477_Reverse transcriptase domain	AT3G24255.5	.	RNA-directed DNA polymerase (reverse transcriptase)-related family protein	0.04	0.19	0.76	8.44	5.16	8.31	1.17	2.69	6.61	1.98	1.58	1.81	4.68	3.66	3.33	3.19	7.37	0.71	3.21377	1.86878e-08	6.81899e-07	2.54907	8.57863e-06	0.000121836	-0.664705	0.219505	0.403616	-1.11045	0.0410145	0.144157	-0.807077	0.137025	0.389718	-1.05954	0.0505635	0.157127
Rg_000698	Transcription initiation factor IIE, alpha subunit [Handroanthus impetiginosus]	IPR002853_Transcription initiation factor IIE subunit alpha, N-terminal	AT1G03280.1	.	Transcription factor TFIIE, alpha subunit	0.18	0.95	1.55	1.96	1.92	2.35	0.85	0.75	0.76	0.88	0.82	0.98	2.33	2.64	1.91	1.96	3.25	0.45	-0.333112	0.197278	0.370851	-1.47985	7.49807e-08	1.83822e-06	-1.14674	1.44695e-05	0.00019276	-0.314517	0.222976	0.473804	0.117342	0.642385	0.873357	-0.0142332	0.954478	1
Rg_000699	polyprotein [Broad bean wilt virus 2]	IPR000199_Peptidase C3A/C3B, picornaviral; IPR009003_Peptidase S1, PA clan; IPR027417_P-loop containing nucleoside triphosphate hydrolase; IPR000605_Helicase, superfamily 3, single-stranded DNA/RNA virus	AT1G75010.1	ARC3	GTP binding protein	0.64	1.73	4.37	4.29	4.73	4.01	4.55	4.35	2.79	2.77	1.66	3.18	4.87	5.61	4.54	4.84	7.93	0.68	-0.612608	0.0193378	0.0675653	-0.535781	0.0416966	0.133133	0.076827	0.766602	0.887048	0.154494	0.552696	0.795301	0.140183	0.590474	0.841729	0.0615273	0.811852	0.934253
Rg_000700	unnamed protein product [Lactuca saligna] CAB4077486.1 unnamed protein product [Lactuca saligna]	IPR010227_NADH-quinone oxidoreductase, chain M/4; IPR001750_NADH:quinone oxidoreductase/Mrp antiporter, membrane subunit; IPR003918_NADH:ubiquinone oxidoreductase	ATMG00580.1	NAD4	NADH dehydrogenase subunit 4	0.2	0.12	0.6	0.17	0.12	0.22	0.35	0.16	0.24	0.02	0.17	0.12	0.09	0.23	0.26	3.87	1.24	0.14	-2.83255	0.000296366	0.00243603	-1.99479	0.00991261	0.0445648	0.83776	0.291514	0.487387	0.109967	0.89409	0.990935	3.45407	7.88723e-06	0.000166994	0.120636	0.88137	0.967937
Rg_000701	E3 ubiquitin-protein ligase KEG [Sesamum indicum]	IPR020683_Ankyrin repeat-containing domain; IPR000719_Protein kinase domain; IPR011009_Protein kinase-like domain superfamily; IPR001841_Zinc finger, RING-type; IPR036770_Ankyrin repeat-containing domain superfamily; IPR002110_Ankyrin repeat; IPR040847_Mind bomb, SH3 repeat domain	AT5G13530.1	KEG	protein kinases;ubiquitin-protein ligase	1.75	7.92	17.36	24.37	22.09	23.57	12.97	15.93	13.67	6.59	9.03	8.45	19.1	16.84	15.55	15.06	27.76	2.6	-0.094026	0.528932	0.708841	-0.547924	0.000272068	0.00239606	-0.453898	0.00214436	0.0125466	-0.659138	9.99889e-06	0.000116121	-0.49482	0.000891519	0.00926202	-0.593566	6.00464e-05	0.000544519
Rg_000702	hypothetical protein PHJA_001911800 [Phtheirospermum japonicum]	IPR028942_WHIM1 domain; IPR018501_DDT domain	AT1G18950.1	.	DDT domain superfamily	0.24	0.88	1.54	1.15	1	1.32	2.1	1.6	0.35	0.3	0.4	0.58	0.93	0.63	0.84	0.66	0.83	0.17	-1.22999	0.00528126	0.0247406	-0.834773	0.0584615	0.170296	0.395219	0.367144	0.567495	-0.557061	0.218978	0.468324	-0.678494	0.135996	0.38812	-0.693723	0.121169	0.298388
Rg_000703	cyclic nucleotide-gated ion channel 1 [Sesamum indicum]	IPR000595_Cyclic nucleotide-binding domain; IPR005821_Ion transport domain; IPR018490_Cyclic nucleotide-binding-like	AT5G53130.1	CNGC1	cyclic nucleotide gated channel 1	0.35	0.8	1.56	0.88	1.53	1.12	2.54	2.7	3.46	1.22	0.78	0.4	1.64	0.95	2.67	0.76	0.82	0.13	-1.34099	0.00588561	0.0269036	0.251493	0.601997	0.793322	1.59248	0.000914354	0.00627249	0.378046	0.438604	0.703422	-0.757645	0.13102	0.380287	0.441184	0.362304	0.610672
Rg_000704	protein chromatin remodeling 4 [Phtheirospermum japonicum]	IPR019787_Zinc finger, PHD-finger; IPR018501_DDT domain; IPR001965_Zinc finger, PHD-type; IPR011011_Zinc finger, FYVE/PHD-type; IPR028942_WHIM1 domain	AT5G22760.2	.	PHD finger family protein	0.08	0	0	0.61	0.93	0	0	0.09	0.96	0	0	0.74	0.71	0.73	0.53	0.66	1.09	0	0.672773	0.810715	0.912548	0.657517	0.815009	0.935254	-0.0152557	0.995647	1	-0.134856	0.961563	1	-0.144434	0.958843	1	0.224841	0.93589	0.992564
Rg_000705	protein GIGANTEA-like [Sesamum indicum]	IPR026211_GIGANTEA	AT1G22770.1	GI	gigantea protein (GI)	0.83	2.5	5.73	1.16	1.44	0.85	4.09	4.8	0.86	1.39	1.6	1.39	1.49	2.12	2	2.51	3.3	0.29	-2.97131	1.56775e-14	3.00647e-12	-1.30881	0.000580959	0.00450496	1.66249	1.74405e-05	0.000226422	1.24354	0.00145343	0.00953105	0.929213	0.0180205	0.0977251	0.571386	0.144471	0.337052
Rg_000706	ATP synthase subunit 1 [Neobartsia pedicularoides]	IPR000194_ATPase, F1/V1/A1 complex, alpha/beta subunit, nucleotide-binding domain; IPR004100_ATPase, F1/V1/A1 complex, alpha/beta subunit, N-terminal domain; IPR005294_ATP synthase, F1 complex, alpha subunit; IPR027417_P-loop containing nucleoside triphosphate hydrolase; IPR036121_ATPase, F1/V1/A1 complex, alpha/beta subunit, N-terminal domain superfamily; IPR000793_ATP synthase, alpha subunit, C…	ATMG01190.1	ATP1	ATP synthase subunit 1	1.56	1.53	3.86	0.4	0.51	0.87	1.91	1.83	2	0.34	0.6	0.36	0.77	1.09	1.28	20.16	3.08	0.39	-4.00655	2.90884e-08	9.91201e-07	-2.05543	0.00404396	0.021995	1.95112	0.00703901	0.0323617	0.384219	0.601222	0.829625	3.75969	1.88916e-07	6.19867e-06	0.657414	0.367074	0.615705
Rg_000707	PREDICTED: dicer-like protein 4 isoform X1 [Erythranthe guttata]	IPR001650_Helicase, C-terminal; IPR005034_Dicer dimerisation domain; IPR003100_PAZ domain; IPR027417_P-loop containing nucleoside triphosphate hydrolase	AT5G20320.1	DCL4	dicer-like 4	0.17	0.87	1.08	1.32	1.18	1	0.87	1.16	1.24	0.7	1.42	1.09	0.66	0.9	0.85	0.55	1.88	0	-0.92659	0.0949317	0.219823	-0.728527	0.190233	0.38636	0.198063	0.719437	0.857367	0.740206	0.178779	0.411217	-0.850457	0.133559	0.384203	-0.660627	0.235942	0.468196
Rg_000708	hypothetical protein CDL12_27576 [Handroanthus impetiginosus]	IPR036638_Helix-loop-helix DNA-binding domain superfamily	AT1G51120.1	.	AP2/B3 transcription factor family protein	0.07	0.16	0.47	0.77	1.07	1	0.69	0.79	0.49	0.62	0.44	0.64	1.17	0.93	0.67	1.41	1.56	0.22	0.512965	0.127907	0.273104	0.211856	0.540653	0.746815	-0.301109	0.323912	0.522916	0.166676	0.584133	0.818218	0.38196	0.203025	0.492775	-0.215461	0.475796	0.712986
Rg_000709	UDP-glucose:glycoprotein glucosyltransferase [Handroanthus impetiginosus]	IPR040693_UGGT, thioredoxin-like domain 1; IPR029044_Nucleotide-diphospho-sugar transferases; IPR040692_UGGT, thioredoxin-like domain 3; IPR040497_Glucosyltransferase 24, catalytic domain; IPR040525_UDP-glucose:glycoprotein glucosyltransferase, thioredoxin-like domain 4; IPR040694_UGGT, thioredoxin-like domain 2; IPR009448_UDP-glucose:Glycoprotein Glucosyltransferase	AT1G71220.3	EBS1	EMS-MUTAGENIZED BRI1 SUPPRESSOR 1	1.79	8.73	19.23	30	28.29	28.12	33.32	32.78	32.4	12.27	18.67	15.67	35.06	31.59	26.5	17.86	42.18	4.13	0.0987196	0.624457	0.783072	0.56427	0.00513514	0.0265678	0.46555	0.0196987	0.071459	-0.0151165	0.939848	1	-0.274874	0.17087	0.444716	-0.0430717	0.829397	0.942821
Rg_000710	RHOMBOID-like protein 2 [Olea europaea var. sylvestris]	IPR022764_Peptidase S54, rhomboid domain	AT1G63120.1	RBL2	RHOMBOID-like 2	2.28	9.2	17.39	16.04	15.09	13.94	36.22	32.48	17.17	5.9	8.67	6.52	22.53	19.9	16.75	15.73	25.17	2.63	-0.915787	3.62639e-08	1.19216e-06	0.236304	0.153315	0.334009	1.15209	2.27667e-12	1.8342e-10	-0.216293	0.195423	0.436003	0.115482	0.487582	0.773355	0.243407	0.140352	0.330425
Rg_000711	Retrovirus-related Pol polyprotein from transposon TNT 1-94 [Vitis vinifera]	IPR001584_Integrase, catalytic core; IPR013103_Reverse transcriptase, RNA-dependent DNA polymerase; IPR012337_Ribonuclease H-like superfamily	AT4G23160.3	CRK8	cysteine-rich RECEPTOR-like kinase	0.2	0.8	1.68	1.08	1.69	2.23	1.29	2.91	0.63	1.43	0.24	0.41	3.98	4.46	2.77	4.21	5.73	0.15	-0.589834	0.372877	0.566624	-0.514057	0.438225	0.657446	0.0757768	0.908369	0.968113	-0.265049	0.688918	0.884039	0.81896	0.212879	0.506168	0.986947	0.132172	0.316765
Rg_000712	RNA-directed DNA polymerase (reversetranscriptase)-related family protein [Striga asiatica]	IPR000477_Reverse transcriptase domain; IPR036691_Endonuclease/exonuclease/phosphatase superfamily	.	.	.	0.02	0.03	0.08	1.2	1.39	1.08	0.67	1.31	0.3	1.06	1.95	0.85	1.8	1.38	1.6	0.97	1.43	0.11	3.14526	8.33017e-09	3.36507e-07	2.63843	1.78488e-06	3.07596e-05	-0.506832	0.185576	0.360608	0.928415	0.0127378	0.057921	-0.476961	0.219457	0.514691	0.230708	0.537402	0.760119
Rg_000713	Retrovirus-related Pol polyprotein from transposon TNT 1-94 [Dendrobium catenatum]	IPR013103_Reverse transcriptase, RNA-dependent DNA polymerase; IPR012337_Ribonuclease H-like superfamily; IPR001878_Zinc finger, CCHC-type; IPR036875_Zinc finger, CCHC-type superfamily; IPR025724_GAG-pre-integrase domain; IPR001584_Integrase, catalytic core	AT4G23160.3	CRK8	cysteine-rich RECEPTOR-like kinase	0.92	4.18	12.54	28.56	24.56	30.59	25.35	27.03	17.58	16.46	15.77	17.38	27.85	20.31	23.88	15.59	33.01	3.78	0.910045	8.50493e-05	0.000861815	0.885659	0.000133585	0.00130229	-0.0243854	0.914885	0.971803	0.148852	0.514464	0.766255	-0.464262	0.0427084	0.180487	-0.369046	0.106049	0.271384
Rg_000714	bromodomain and WD repeat-containing protein 3 isoform X1 [Sesamum indicum]	IPR001680_WD40 repeat; IPR036322_WD40-repeat-containing domain superfamily	AT2G47410.5	.	WD40 domain-containing protein	0	0.38	0.05	0.89	0.44	0.88	2.13	1.38	0.48	0.7	0.43	1.02	0.26	2.44	0.36	0.72	2.96	0.1	0.601364	0.552921	0.728195	1.64567	0.103634	0.255661	1.0443	0.289991	0.485737	0.89807	0.36381	0.635599	0.596097	0.547445	0.814878	0.331005	0.737907	0.894804
Rg_000715	hypothetical protein [Vitis hybrid cultivar]	IPR025724_GAG-pre-integrase domain; IPR001584_Integrase, catalytic core; IPR036875_Zinc finger, CCHC-type superfamily; IPR013103_Reverse transcriptase, RNA-dependent DNA polymerase; IPR001878_Zinc finger, CCHC-type; IPR012337_Ribonuclease H-like superfamily	AT4G23160.3	CRK8	cysteine-rich RECEPTOR-like kinase	0	0.58	1.38	0	0	0	0.96	1.53	0	0	0	0	0	0	0	0	0	0	-9.03676	0.0785261	0.191996	-0.630323	0.899704	0.988335	8.40644	0.101678	0.237241	0	1	1	0	1	1	0	1	1
Rg_000716	uncharacterized protein LOC105155189 [Sesamum indicum]	.	AT5G24280.2	GMI1	gamma-irradiation and mitomycin c induced 1	0.4	0.83	4.49	2.92	1.48	1.59	4.29	3.41	6.58	1.02	2.72	1.76	1.06	0.83	0.42	1.78	2.66	0.35	-1.29186	0.0041505	0.020432	0.327407	0.464446	0.681063	1.61926	0.00028258	0.00238017	0.738905	0.100181	0.277836	-0.0450731	0.920929	0.997936	-1.52587	0.00098805	0.00631697
Rg_000717	DNA-directed RNA polymerase V subunit 1 [Sesamum indicum]	IPR006592_RNA polymerase, N-terminal; IPR007066_RNA polymerase Rpb1, domain 3; IPR000722_RNA polymerase, alpha subunit; IPR007080_RNA polymerase Rpb1, domain 1	AT2G40030.1	NRPD1B	nuclear RNA polymerase D1B	0.09	0.07	0.77	1.06	0.7	0.82	0.38	0.41	0.58	0.21	0.19	0.35	0.33	0.52	0.25	0.21	0.68	0.13	0.0626546	0.914637	0.97112	-0.528856	0.373653	0.597625	-0.591511	0.302748	0.500287	-0.859503	0.14239	0.353785	-0.848341	0.147421	0.407732	-1.36843	0.0194922	0.0753253
Rg_000718	probable helicase DDB_G0274399 [Sesamum indicum] XP_011083395.1 probable helicase DDB_G0274399 [Sesamum indicum] XP_020551124.1 probable helicase DDB_G0274399 [Sesamum indicum]	IPR027417_P-loop containing nucleoside triphosphate hydrolase; IPR041677_DNA2/NAM7 helicase, AAA domain; IPR041679_DNA2/NAM7 helicase-like, AAA domain	AT4G30100.1	.	P-loop containing nucleoside triphosphate hydrolases superfamily protein	0.71	3.22	6.2	10.32	10.72	9.82	12.75	12.67	9.03	4.45	7.35	6.81	15.66	12.59	13.8	7.28	14	1.58	0.0851123	0.607927	0.770349	0.487862	0.00328382	0.0186499	0.402749	0.011707	0.0480348	0.142083	0.379033	0.650002	-0.234926	0.149575	0.411124	0.298109	0.0620315	0.183511
Rg_000719	RNA-directed DNA polymerase (reversetranscriptase)-related family protein [Striga asiatica]	IPR025558_Domain of unknown function DUF4283; IPR025836_Zinc knuckle CX2CX4HX4C	AT1G43760.1	.	DNAse I-like superfamily protein	0	0	0	2.22	1.33	2.09	0	0.4	0	0.48	0.34	0.73	1.69	1.58	0.92	1.35	2.05	0.31	8.11574	1.83848e-08	6.72617e-07	4.41984	0.0026695	0.0158136	-3.6959	2.96708e-05	0.000356596	-0.934545	0.267632	0.53097	-0.290556	0.729305	0.920604	-0.581692	0.487745	0.723026
Rg_000720	protein NAP1 isoform X2 [Sesamum indicum]	IPR019137_Nck-associated protein 1	AT2G35110.1	GRL	transcription activator	0.26	0.78	1.54	0.69	1.4	0.6	1.31	1.18	0.95	0.24	0	0.65	1.11	0.72	0.5	1.54	1.7	0.45	-1.57707	0.0286768	0.0911323	-0.973663	0.176253	0.367158	0.60341	0.401668	0.60161	-0.630394	0.390084	0.660225	1.0142	0.158836	0.425878	-0.391317	0.589441	0.798974
Rg_000721	glucuronoxylan 4-O-methyltransferase 1 [Sesamum indicum]	IPR006514_IRX15/IRX15L/IGXM; IPR021148_Polysaccharide biosynthesis domain	AT3G48590.1	NF-YC1	nuclear factor Y, subunit C1	0.15	0.73	1.38	2.59	1.81	2.96	0.5	0.97	0.18	1.3	1.5	1.23	4.12	2.28	2.08	2.71	3.65	0.41	0.18388	0.606275	0.76916	-1.77622	2.82762e-06	4.61272e-05	-1.9601	9.0701e-08	2.32186e-06	0.0190019	0.956423	1	0.0621009	0.858259	0.977756	0.0303427	0.929852	0.989776
Rg_000722	DNA-(apurinic or apyrimidinic site) lyase [Handroanthus impetiginosus]	IPR011257_DNA glycosylase; IPR003651_Endonuclease III-like, iron-sulphur cluster loop motif; IPR003265_HhH-GPD domain	AT2G36490.1	DML1	demeter-like 1	0	0.07	0.26	0.22	0.74	0.27	1.01	0.76	1.2	0.31	0.41	0.19	0.51	0.38	0.81	0.48	1.08	0.02	0.72204	0.310084	0.501775	2.2707	0.00122595	0.00836161	1.54866	0.0157724	0.060466	0.394102	0.548922	0.792562	0.160803	0.808076	0.957078	0.308161	0.636133	0.831791
Rg_000723	nucleolin isoform X1 [Sesamum indicum]	IPR035979_RNA-binding domain superfamily; IPR000504_RNA recognition motif domain	AT2G44710.4	.	RNA-binding (RRM/RBD/RNP motifs) family protein	0	0	0.17	0	0.1	0.25	0	0.4	0.12	0.13	0.15	0.13	0.16	0.35	0.26	0.32	0.19	0.05	0.282272	0.838459	0.9276	0.971949	0.48117	0.696268	0.689676	0.597524	0.766396	1.08002	0.408422	0.676975	1.05478	0.419985	0.722696	0.937335	0.471117	0.709105
Rg_000724	UDP-glucose:glycoprotein glucosyltransferase [Handroanthus impetiginosus]	IPR040525_UDP-glucose:glycoprotein glucosyltransferase, thioredoxin-like domain 4; IPR040693_UGGT, thioredoxin-like domain 1; IPR040692_UGGT, thioredoxin-like domain 3; IPR040694_UGGT, thioredoxin-like domain 2	AT1G71220.3	EBS1	EMS-MUTAGENIZED BRI1 SUPPRESSOR 1	0	0	0	3.6	2.73	3.34	0	1.03	0	1.02	0.54	0	0.77	0.97	2.08	1.66	3.99	0.27	8.89354	2.69085e-06	4.74503e-05	5.69042	0.0028049	0.0164606	-3.20312	0.0324004	0.103655	-1.66285	0.264489	0.527165	-0.691911	0.641845	0.873124	-1.44802	0.330471	0.577188
Rg_000725	pentatricopeptide repeat-containing protein At2g03880, mitochondrial [Sesamum indicum]	IPR032867_DYW domain; IPR002885_Pentatricopeptide repeat; IPR011990_Tetratricopeptide-like helical domain superfamily	AT3G61170.1	.	Tetratricopeptide repeat (TPR)-like superfamily protein	0.16	0.23	0.52	0.82	0.81	1.02	1.72	1.36	4.23	0.12	0.24	0.41	0.72	0.95	0.53	0.67	1.13	0.16	-0.266298	0.64088	0.795706	1.5728	0.00536073	0.0274955	1.8391	0.000828649	0.00578888	-0.923554	0.110855	0.298235	-0.145747	0.796853	0.9518	-0.43504	0.439718	0.683108
Rg_000726	proteasome-associated protein ecm29 homolog [Phtheirospermum japonicum]	IPR016024_Armadillo-type fold; IPR024372_Proteasome component Ecm29	AT2G26780.2	.	ARM repeat superfamily protein	0.04	0.1	0.35	0.53	0.33	0.54	0.31	0.3	0.42	0.32	0.62	0.16	0	0	0.2	0.15	0.2	0	0.0742961	0.926872	0.97789	-0.0702969	0.931329	1	-0.144593	0.854409	0.938019	0.502947	0.521653	0.771504	-2.08139	0.0155261	0.0875548	-2.76915	0.00157779	0.00943175
Rg_000727	hypothetical protein CDL12_13980 [Handroanthus impetiginosus]	IPR008587_Filament-like plant protein	AT1G19835.1	.	filament-like protein (DUF869)	0	0.03	0.03	0.44	0.65	0.28	2.46	1.72	0.96	0.44	0.24	0.25	0.36	0.43	0.3	0.43	1.05	0.05	2.89942	0.000169072	0.0015334	5.02835	3.94215e-11	1.9938e-09	2.12893	8.88725e-06	0.000126813	0.357897	0.47656	0.735227	0.114187	0.821957	0.962673	-0.509956	0.318206	0.56398
Rg_000728	pre-mRNA-splicing factor ATP-dependent RNA helicase DEAH1 isoform X1 [Sesamum indicum]	IPR027417_P-loop containing nucleoside triphosphate hydrolase; IPR001650_Helicase, C-terminal; IPR011709_Domain of unknown function DUF1605; IPR007502_Helicase-associated domain	AT1G32490.1	ESP3	RNA helicase family protein	0	0	0	2.96	3.63	4.19	0	0.95	1.08	0.61	1.4	0.51	3.92	2.36	2.35	4.08	3.3	0.46	9.06678	4.10066e-10	2.50229e-08	6.97791	1.62188e-06	2.83468e-05	-2.08888	0.014652	0.057226	-1.27048	0.136598	0.344558	-0.254601	0.764605	0.937614	-0.498494	0.557322	0.775258
Rg_000729	nuclear pore complex protein NUP214 isoform X2 [Sesamum indicum]	.	AT1G55540.1	LNO1	Nuclear pore complex protein	1.13	4.49	8.67	16.11	16.94	17.65	13.43	14.7	8.76	5.04	6.17	5.55	11.5	9.93	10.68	6.7	13.91	1.78	0.278835	0.107956	0.241329	0.0459761	0.792108	0.920448	-0.232859	0.17058	0.340191	-0.711869	3.55441e-05	0.000362909	-0.930651	7.59913e-08	2.73511e-06	-0.810338	2.13454e-06	2.69361e-05
Rg_000730	unnamed protein product [Triticum turgidum subsp. durum]	IPR002885_Pentatricopeptide repeat	AT3G43740.2	.	Leucine-rich repeat (LRR) family protein	0.05	0.24	0.68	0	0	0.22	0	0.25	0.53	0.03	0.08	0	0	0	0.29	0.86	0.19	0.09	-3.44106	0.0608713	0.159054	-1.29289	0.475395	0.690857	2.14817	0.242031	0.430768	-0.20899	0.912221	0.998284	2.75202	0.133743	0.384506	0.300878	0.871528	0.963455
Rg_000731	wall-associated kinase 2 [Prunus dulcis]	IPR001584_Integrase, catalytic core; IPR025724_GAG-pre-integrase domain; IPR005162_Retrotransposon gag domain; IPR013103_Reverse transcriptase, RNA-dependent DNA polymerase; IPR012337_Ribonuclease H-like superfamily; IPR029472_Retrotransposon Copia-like, N-terminal	AT4G23160.3	CRK8	cysteine-rich RECEPTOR-like kinase	0.22	0.57	1.38	1	0.95	0.65	0.79	1.05	0.28	0.49	0.21	0.25	1.07	0.5	0.59	0.5	0.84	0.08	-1.35327	0.00117913	0.00750401	-1.45529	0.000581612	0.00450847	-0.10202	0.808375	0.911552	-0.474275	0.274982	0.539761	-0.733585	0.094961	0.308851	-0.427328	0.313403	0.558458
Rg_000732	copper-transporting P-type ATPase [Striga asiatica]	IPR008250_P-type ATPase, A domain superfamily; IPR001757_P-type ATPase	AT5G44790.1	RAN1	copper-exporting ATPase / responsive-to-antagonist 1 / copper-transporting ATPase (RAN1)	0	0.03	0.24	0.6	1.48	0.65	1.39	4.4	3.61	0.25	0.48	0.19	0.54	0.25	0.41	1.49	1.37	0.06	2.25388	0.00221052	0.0124102	4.30751	3.89775e-09	1.28874e-07	2.05363	0.00132105	0.00847408	-0.703178	0.287217	0.553941	0.032468	0.96027	1	-1.35063	0.0416437	0.13563
Rg_000733	ATP-dependent RNA helicase DEAH12, chloroplastic [Sesamum indicum]	IPR011709_Domain of unknown function DUF1605; IPR007502_Helicase-associated domain; IPR014001_Helicase superfamily 1/2, ATP-binding domain; IPR011545_DEAD/DEAH box helicase domain; IPR027417_P-loop containing nucleoside triphosphate hydrolase; IPR002867_IBR domain; IPR001650_Helicase, C-terminal	AT5G10370.1	.	helicase domain-containing protein / IBR domain-containing protein / zinc finger protein-like protein	1.09	3.59	8.5	13.89	14.99	14.94	8.92	11.11	8.96	3.55	4.58	3.97	7.03	7.11	6.53	8.45	14.51	1.82	0.21161	0.143565	0.296727	-0.132017	0.366843	0.590992	-0.343627	0.0145844	0.0570306	-0.976108	1.61798e-11	4.91816e-10	-0.597361	2.9734e-05	0.000529192	-1.23364	8.4982e-18	5.49244e-16
Rg_000734	histone H1-like [Sesamum indicum]	IPR005818_Linker histone H1/H5, domain H15; IPR036390_Winged helix DNA-binding domain superfamily; IPR005819_Histone H5	AT2G30620.2	.	winged-helix DNA-binding transcription factor family protein	0.09	0.36	1.14	0.9	0.88	1.1	0.65	0.67	0.15	0.46	0.32	0.4	0.62	0.67	0.51	0.9	2.16	0.17	-0.510737	0.182711	0.351751	-1.28287	0.00132755	0.00892317	-0.772132	0.0458466	0.134313	-0.3761	0.331426	0.601948	0.242523	0.519429	0.79558	-0.835183	0.0305223	0.10698
Rg_000735	uncharacterized protein LOC105164793 [Sesamum indicum]	IPR019542_Enhancer of polycomb-like, N-terminal; IPR002999_Tudor domain	AT4G32620.1	.	Enhancer of polycomb-like transcription factor protein	0.35	1.28	3.7	6.34	7.46	6.22	9.89	10.26	4.66	2.11	3.24	2.43	4.97	4.85	4.97	3.56	5.94	0.89	0.479786	0.0393522	0.115205	0.996922	1.8289e-05	0.000237691	0.517136	0.0202159	0.0729123	-0.491063	0.0310764	0.116286	-0.648479	0.00459573	0.0344389	-0.582382	0.009873	0.0435147
Rg_000736	squamous cell carcinoma antigen recognized by T-cells 3 [Sesamum indicum]	IPR003107_HAT (Half-A-TPR) repeat; IPR011990_Tetratricopeptide-like helical domain superfamily	AT4G24270.3	EMB140	EMBRYO DEFECTIVE 140	0.08	0.28	0.62	2.05	1.34	1.93	1.39	1.43	1.19	0.46	0.47	0.79	1.73	1.23	0.95	0.9	1.76	0.24	0.874767	0.00646833	0.028965	0.730301	0.0247784	0.0903804	-0.144466	0.619129	0.783135	-0.727711	0.0167949	0.0719897	-0.609854	0.043003	0.181299	-0.602461	0.040818	0.133571
Rg_000737	Glycosyltransferase [Handroanthus impetiginosus]	.	AT4G10120.5	ATSPS4F	Sucrose-phosphate synthase family protein	0	0	0.02	0.84	0.74	0.82	0	0.19	0	0.52	0.54	0.45	1.13	0.56	0.33	1.83	2.08	0.1	5.2356	7.4357e-06	0.000111202	1.74552	0.158828	0.342318	-3.49008	1.10113e-05	0.000152333	0.228312	0.738359	0.911918	0.701901	0.30207	0.613077	-0.417839	0.541788	0.763627
Rg_000738	RNA-dependent-RNA-polymerase [Youcai mosaic virus]	IPR027417_P-loop containing nucleoside triphosphate hydrolase; IPR002588_Alphavirus-like methyltransferase (MT) domain; IPR027351_(+) RNA virus helicase core domain	.	.	.	244.04	357.23	1043.63	59.71	160.18	146.78	34.42	57.03	25.96	276.44	54.15	163.11	15.32	21.18	29.01	9.56	4.12	2065.57	-3.91781	0.0108296	0.0433594	-5.38466	0.000461735	0.00372045	-1.46685	0.340095	0.540184	1.38939	0.366182	0.637794	5.10075	0.000908189	0.00940281	-2.64107	0.0858827	0.232974
Rg_000739	RNA-directed DNA polymerase-like protein [Striga asiatica]	IPR000477_Reverse transcriptase domain; IPR026960_Reverse transcriptase zinc-binding domain; IPR036691_Endonuclease/exonuclease/phosphatase superfamily	AT1G43760.1	.	DNAse I-like superfamily protein	0.13	0.52	1.84	0.5	0.63	0.6	2.9	2.69	0	0.2	0.41	0.23	1.14	1.61	1.05	0.14	0.49	0.05	-1.82827	0.0347916	0.10513	-0.0263023	0.975605	1	1.80197	0.0364002	0.113178	-0.202616	0.817364	0.952504	-1.20913	0.177907	0.454858	0.986153	0.253471	0.489997
Rg_000740	transcription elongation factor SPT6 homolog [Sesamum indicum]	IPR041692_HHH domain 9; IPR028231_Transcription elongation factor Spt6, YqgF domain; IPR017072_Transcription elongation factor Spt6; IPR022967_RNA-binding domain, S1; IPR010994_RuvA domain 2-like; IPR032706_Transcription elongation factor Spt6, helix-hairpin-helix motif; IPR036860_SH2 domain superfamily; IPR012340_Nucleic acid-binding, OB-fold; IPR006641_YqgF/RNase H-like domain; IPR012337_Ribonu…	AT1G65440.1	GTB1	global transcription factor group B1	0.1	0.65	1.3	2.2	6.49	1.71	6.3	4.72	12.7	0.6	3.8	1.31	1.94	2.79	2.09	0.74	4.2	0.08	0.952336	0.183563	0.35285	2.505	0.000459629	0.00370564	1.55266	0.027638	0.0921332	-0.0954148	0.892774	0.990239	-1.3454	0.0593428	0.226259	-0.763607	0.28099	0.523265
Rg_000741	ubiquitin carboxyl-terminal hydrolase 26 isoform X1 [Sesamum indicum] XP_011099796.1 ubiquitin carboxyl-terminal hydrolase 26 isoform X1 [Sesamum indicum]	IPR038765_Papain-like cysteine peptidase superfamily; IPR001394_Peptidase C19, ubiquitin carboxyl-terminal hydrolase; IPR035927_DUSP-like superfamily; IPR006615_Peptidase C19, ubiquitin-specific peptidase, DUSP domain; IPR029071_Ubiquitin-like domain superfamily	AT3G49600.1	UBP26	ubiquitin-specific protease 26	0.67	2.62	7.56	9.69	9.63	9.97	8.54	9.14	6.61	6.1	7.78	6.21	8.43	8.36	8.38	7.79	15.22	1.95	0.0306202	0.865847	0.942667	0.00414991	0.981836	1	-0.0264703	0.880821	0.952693	0.338694	0.0551989	0.180732	0.0188106	0.915736	0.996048	-0.364653	0.039624	0.130624
Rg_000742	hypothetical protein F511_12717 [Dorcoceras hygrometricum]	IPR001878_Zinc finger, CCHC-type; IPR036875_Zinc finger, CCHC-type superfamily	AT4G23160.3	CRK8	cysteine-rich RECEPTOR-like kinase	0.39	1.52	4.03	7.3	4.8	7.69	11.94	11.36	10.2	2.83	2.59	3.11	3.61	4.25	4.57	2.67	7.3	1.28	0.307001	0.365622	0.559529	1.33352	8.20238e-05	0.000854615	1.02652	0.00200726	0.0119196	-0.306773	0.36085	0.632504	-0.375513	0.264034	0.570801	-0.805716	0.0163871	0.0656547
Rg_000743	uncharacterized protein ycf45 isoform X2 [Sesamum indicum]	.	AT5G50375.1	CPI1	cyclopropyl isomerase	0.25	1.05	2.13	4.59	4.3	2.99	4.62	6.02	4.02	2.19	3.46	2.64	4.44	4.04	3.77	1.78	3.91	0.34	0.255568	0.181651	0.350292	0.812205	2.06099e-05	0.000263246	0.556637	0.00151845	0.00948172	0.365271	0.0411166	0.144398	-0.851012	7.47194e-06	0.000159422	-0.0929397	0.602561	0.808746
Rg_000744	histone acetyltransferase HAC1 [Sesamum indicum]	IPR011011_Zinc finger, FYVE/PHD-type; IPR000433_Zinc finger, ZZ-type; IPR035898_TAZ domain superfamily; IPR013178_Histone acetyltransferase Rtt109/CBP; IPR000197_Zinc finger, TAZ-type; IPR019787_Zinc finger, PHD-finger	AT1G79000.2	HAC1	histone acetyltransferase of the CBP family 1	0.63	3.14	6.76	9.38	10.3	8.12	7.09	8.35	6.81	4.68	5.55	4.64	10.47	8.74	8.84	5.52	9.7	1.02	-0.068563	0.668522	0.816892	-0.13189	0.413992	0.635396	-0.0633266	0.683759	0.83189	-0.0116046	0.940999	1	-0.605044	0.000152921	0.0021592	-0.135447	0.383265	0.631063
Rg_000745	Multidrug resistance-associated protein/mitoxantrone resistance protein, ABC superfamily [Handroanthus impetiginosus]	IPR036640_ABC transporter type 1, transmembrane domain superfamily; IPR003439_ABC transporter-like; IPR027417_P-loop containing nucleoside triphosphate hydrolase; IPR003593_AAA+ ATPase domain; IPR011527_ABC transporter type 1, transmembrane domain	AT2G34660.2	ABCC2	multidrug resistance-associated protein 2	0.2	0.88	3.81	0.14	0.11	0.61	6.68	4.99	6.83	0	0.14	0	0	0	0	0.2	0	0	-3.63641	0.00270912	0.0146014	1.03728	0.387187	0.610823	4.67369	0.000111846	0.00109988	-1.98313	0.127605	0.329014	-2.12071	0.105007	0.330044	-6.52365	0.000111208	0.00094114
[truncated: 139,590 more rows]

## Sheet: Table S5
Table S5. GO analysis of up-regulated DEGs (Cutoff: FDR <0.01, p-value <0.01, FC >1.5).
[truncated: 1,221 more rows]

[truncated: 11 more sheets: Table S6, Table S7, Table S8, Table S9, Table S10, Table S11, Table S12, Table S13, Table S14, Table S15, Table S16]
